# Supplementary material for: Transient regulation of focal adhesion via Tensin3 is required for nascent oligodendrocyte differentiation
Source: eLife journal article supplement (doi:10.7554/elife.80273), 2022-10-10

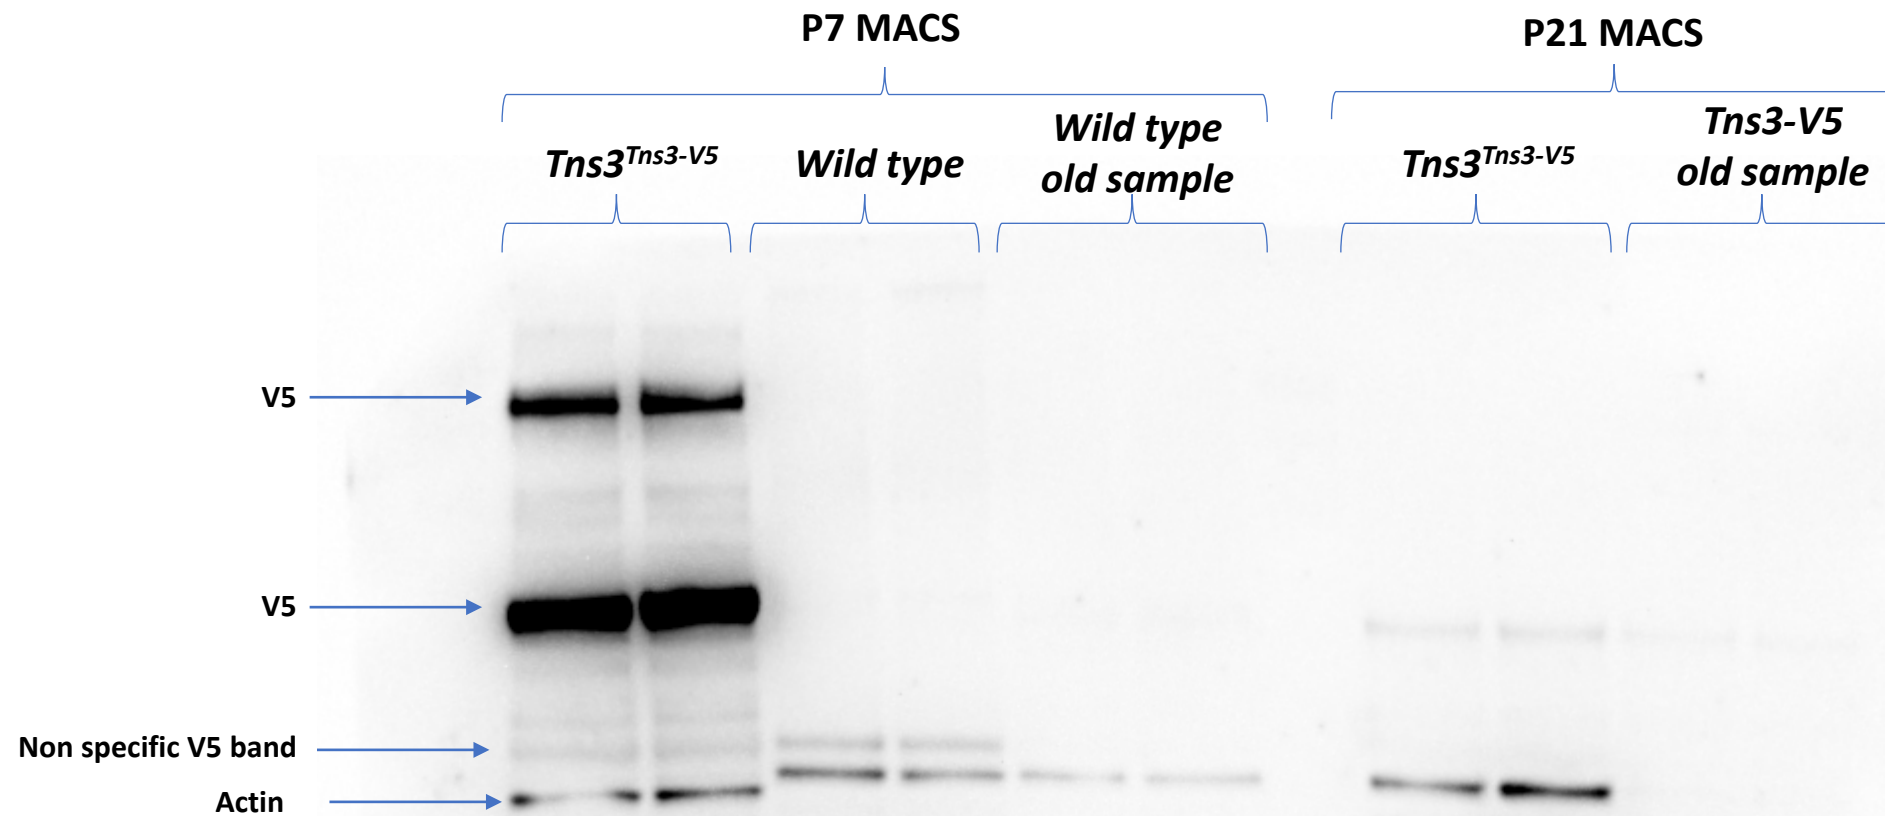

Note: Anti-V5 Western blot followed by anti-actin Western blot

Old sample: material of more than 4 months not giving signal

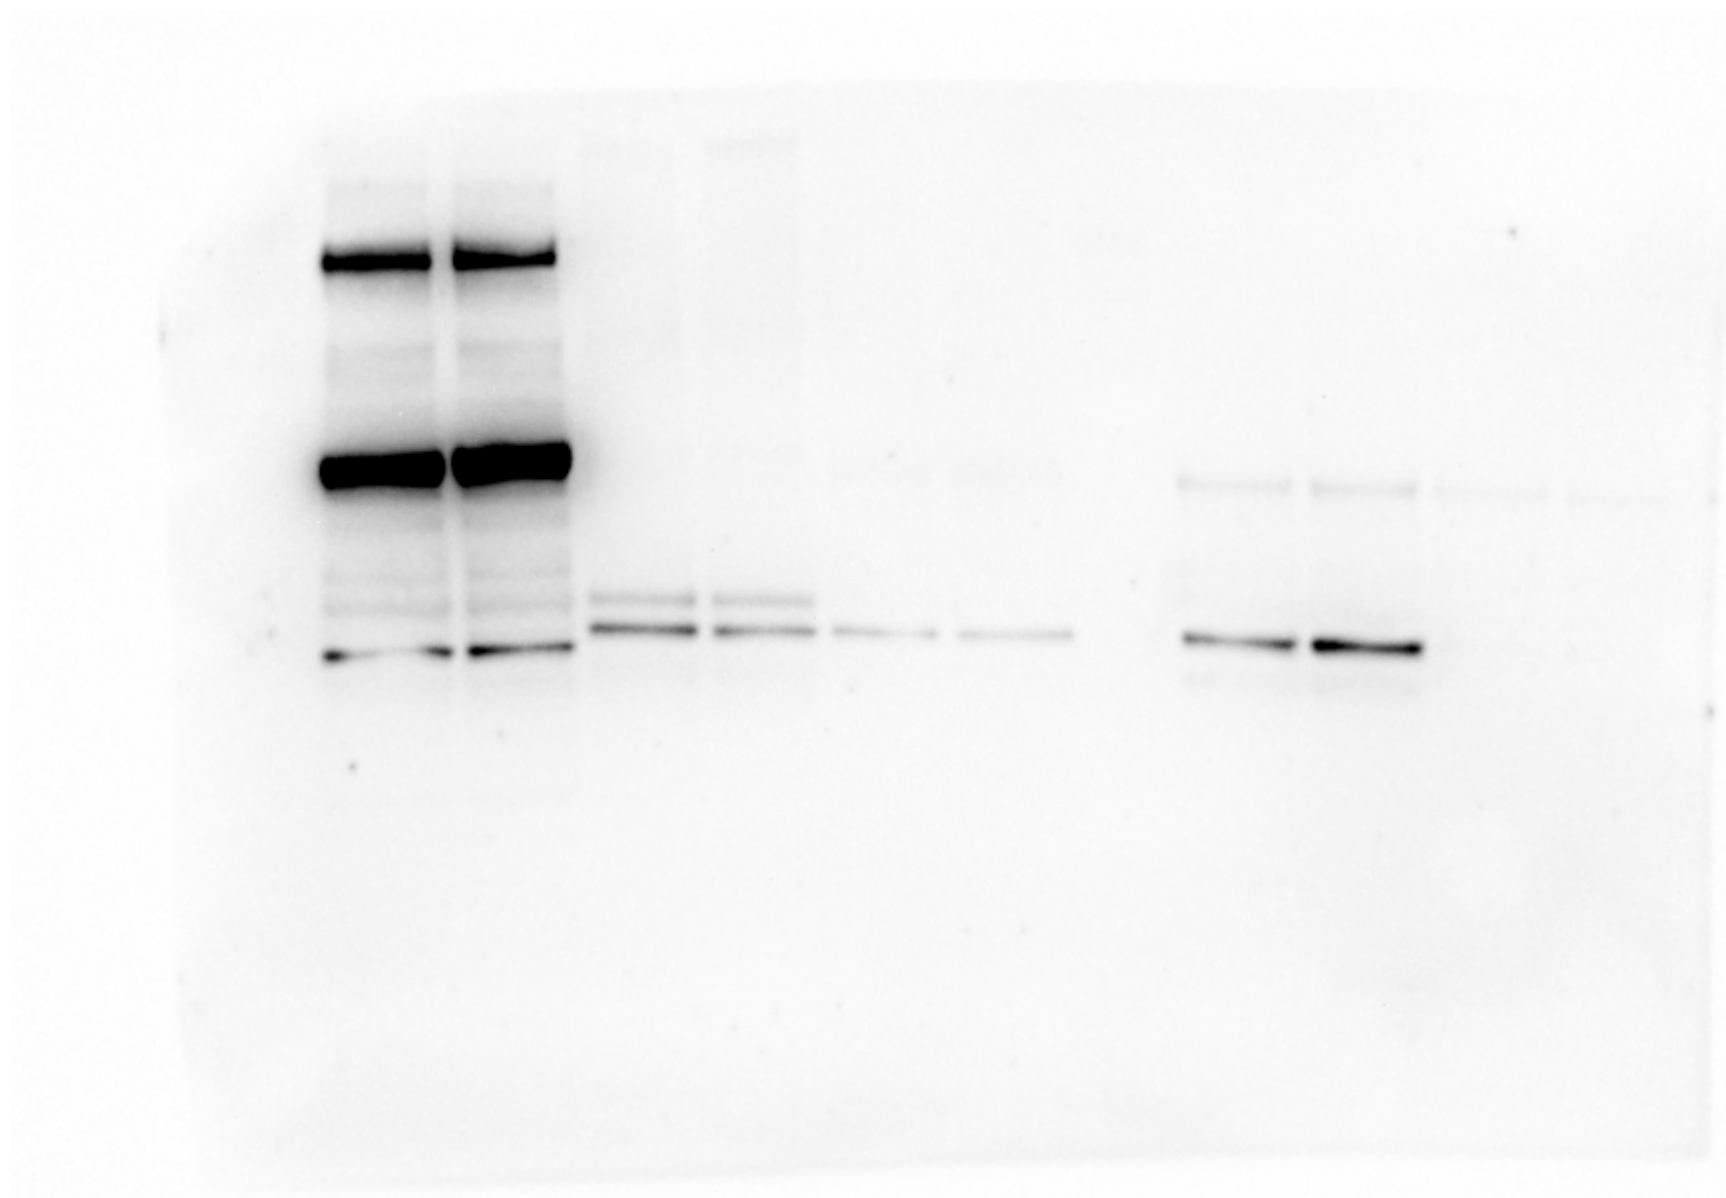

P14 MACS *Tns3*<sup>Tns3-V5</sup>

V5 →

V5 →

Anti-V5 Western blot

← Membrane cut to avoid non specific band at the level of the actin

Actin →

Anti-actin Western blot

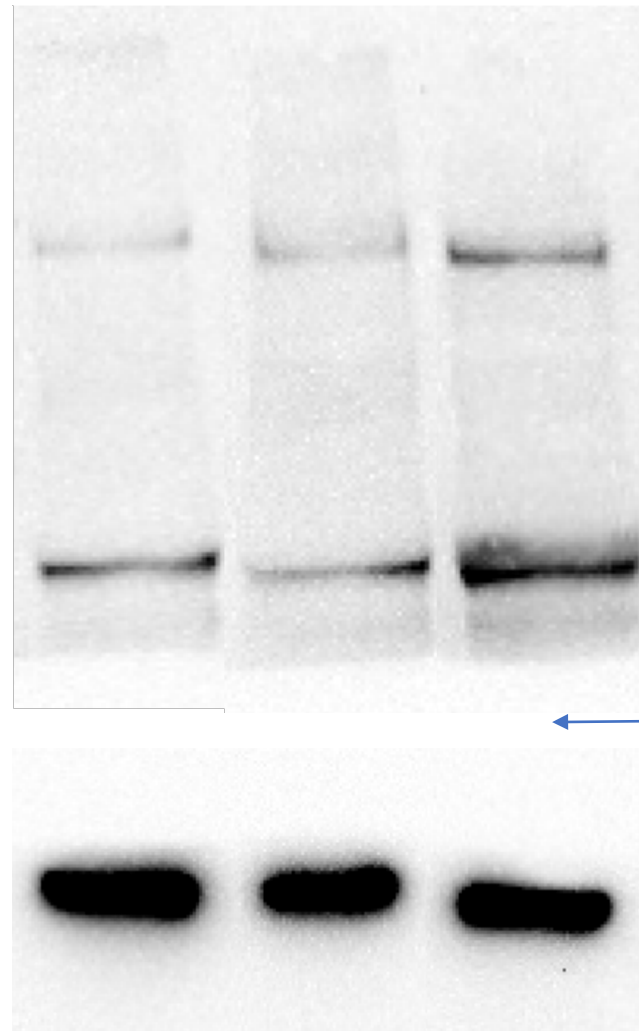

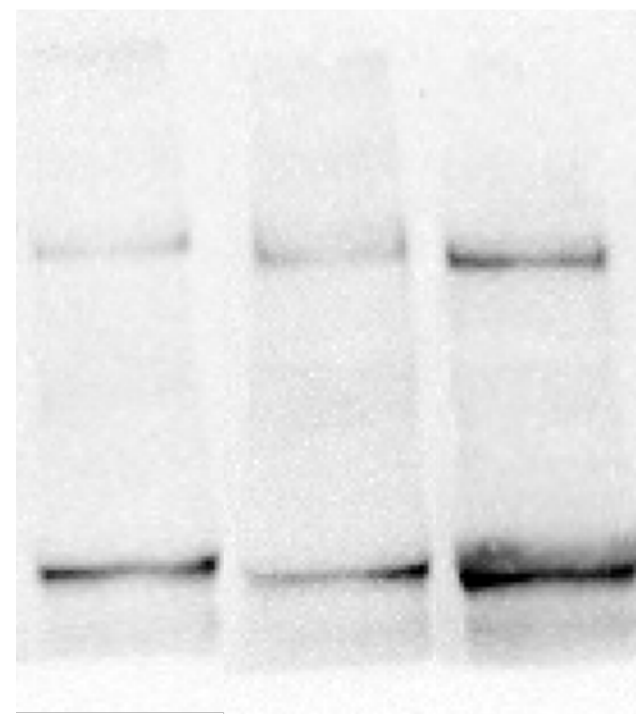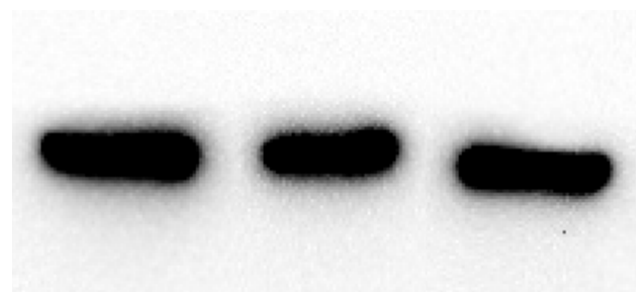

Supplement: fig2-figsupp2-data1 [file elife-80273-fig2-figsupp2-data1-v2.zip]
