# Supplementary material for: Transient regulation of focal adhesion via Tensin3 is required for nascent oligodendrocyte differentiation
Source: eLife journal article supplement (doi:10.7554/elife.80273), 2022-10-10
Supplement: fig3-figsupp3-data2 [file elife-80273-fig3-figsupp3-data2-v2.pdf]

# 1. gRNAs targeting Tns3 ATG (5') with efficiently cutting and Indel generation

## Mus musculus sequence found at [chr11:8549019-8549117](#)

Found 12 possible guide sequences in input (98 bp). Click on a PAM NGG match to show its guide sequence.

Shown below are the PAM site and the nucleotide at position -3 5' of it.

Colors **green**, **yellow** and **red** indicate high, medium and low specificity of the PAM's guide sequence in the genome.

```

0      10      20      30      40      50      60      70      80      90
ttcctcccttgagGACCGTGGTTCAGTCCAGCCATGGAGGACGCCAGCACTGGACCTACGTATGTCACCGAGCGTATCATCGCAGTGTCTT
CCT...c      CCG...g      CCA...c      CCA...g      CCA...a      CCT...c      CCG...c
CCC...g
CCT...c
CCA...g
c...TGG
t...AGG
  
```

|               | Position/<br>Strand | Guide Sequence + PAM<br>Restriction Enzymes                      | Specificity<br>Score | Efficacy Score | Prox.<br>GC | Out-of-<br>Frame<br>Score | Off-targets for<br>0-1-2-3-4<br>mismatches<br>+ next to PAM | Genome Browser links to matches sort<br><input type="checkbox"/> exons only <input type="checkbox"/> chr11 only |
|---------------|---------------------|------------------------------------------------------------------|----------------------|----------------|-------------|---------------------------|-------------------------------------------------------------|-----------------------------------------------------------------------------------------------------------------|
| <b>gRNA#2</b> | 60 / rev            | TACGCTCGGTGACATACGTA AGG<br>PCR primers<br>Restr. Enzymes: SnaBI | 98                   | 7              | -           | 64 %                      | 0-0-0-0-9<br>0-0-0-0-0<br>9 off-targets                     | 4:intron:Deaf17<br>4:intron:Ror2<br>4:intergenic:Ccdc13-Gm17163<br>show all...                                  |
| <b>gRNA#1</b> | 74 / rev            | GGACTGCGATGATACGCT CGG<br>PCR primers                            | 97                   | 68             | -           | 69 %                      | 0-0-0-2-34<br>0-0-0-0-0<br>36 off-targets                   | 4:intergenic:Gm11381-Mylk4<br>4:intergenic:Gm4487-Gm24073<br>4:intron:Diap1<br>show all...                      |
|               | 48 / rev            | CATACGTAAGTCCAGTCC TGG<br>PCR primers                            | 95                   | 19             | -           | 68 %                      | 0-0-0-1-24<br>0-0-0-0-0<br>25 off-targets                   | 3:intergenic:Pk3r1-Gm25808<br>4:intergenic:Bche-Gm6098<br>4:intergenic:Gm22684-Anxa1<br>show all...             |
|               | 56 / fw             | CATGGAGGACAGCCAGAAC TGG<br>PCR primers                           | 80                   | 12             | -           | 55 %                      | 0-0-3-10-135<br>0-0-0-0-1<br>148 off-targets                | 2:intron:Colec10<br>2:intron:Zfp7<br>3:exon:Zfp217<br>show all...                                               |
|               | 3 / rev             | GAACCAGGCTCTGCAAGGG AGG<br>PCR primers                           | 75                   | 3              | +           | 82 %                      | 0-0-0-21-78<br>0-0-0-2-1<br>99 off-targets                  | 3:intergenic:Dnm1-Ciz1<br>3:intergenic:Gm15336/Arhgap26-Gm15336<br>3:exon:Mmp25<br>show all...                  |

### gRNA #1

GGACTGCGATGATACGCT  
AGCGTATCATCGCAGTGTCC

RECOGNIZED SEQUENCE 2 (PAM on the - strand)  
forward sequence corresponding (+ strand)

**55% GC**

### gRNA #2

TACGCTCGGTGACATACGTA  
TACGTATGTCACCGAGCGTA

RECOGNIZED SEQUENCE 1 (PAM on the - strand)  
forward sequence corresponding (+ strand)

**50% GC**

### **gRNA #1 (25+25pb)**

Forward 5' - 3' CACCGGACTGCGATGATACGCT  
Reverse 3' - 5' CCTGTGACGCTACTATGCGACAAA  
Reverse 5' - 3' AAACAGCGTATCATCGCAGTGTCC

### **gRNA #2 (25+25pb)**

Forward 5' - 3' CACCGTACGCTCGGTGACATACGTA  
Reverse 3' - 5' CATGCGAGCCACTGTATGCATCAAA  
Reverse 5' - 3' AAACAGCGTATCATCGCAGTGTCC

## Genomic sequence and gRNA for Tns3

gacaggcgaggtggccttcagctcagctctacatgcagatcctttgggtggctgctgttcccagctttctccgaagccct  
cattagtgagtggttcacatcctttttctgttatccttttcttgacctcctcttccctccttgagGACCGTGGTTCCTGA  
GTCCAGCCATGGAGGACAGCCACGAACCTGGACCTTACGTATGTCACCGAGCGTATCATCGCAGTGTCCCTTCCCTGCCAG  
TTGTTTACAGAGGAGTCTACTTTGCACAGCCTGCAGGAAGTCACACGCATGCTCAAGTGTAAAGCATGGAGACAACCTACCTG  
gtgagtggggatgatagccacgggtgtgggtggatgggctggagggcaggagtcctcagaggactcgtgtgagggccagg  
gtgtccctgtgcttgccttgcttacacctgaggaatggttgggggctggaatctgactcatgagcttaggggcatg  
tcctctacccttctattgttagctttgctgtgtgtgtgacacgggctgtgacagttgactgtaggggtggctgctgct

### New Primers for PCR

**CCT** PAM in reverse strand

**CCCTxxxX** gRNA#1

**TCACCGXX** gRNA#2

## 2. gRNAs targeting Tns3 TGA (3') with efficiently cutting and Indel generation

### Tns3 last part of the cDNA region containing the stop codon.

```
4301 CCCTGAGTAT GACCTTGGTT CAAGAACCTC CTCCAGTGTC TACAGTGGTA
4351 CACTTCAAGG TGTGAGCCCA GGGCATCACC CTGACTGACA ATCAGAGAAA
4401 GCTCTTCTTC CGGAGGCATT ACCCGGTGAG CAGTGTGATT TTCTGTGCTT
4451 TGGATCCACA AGACAGGAAG TGGATCAAAG ATGGCCCTTC TTCTAAAGTC
4501 TTTGGATTTG TGGCCCGGAA ACAGGGCAGT GCTACAGACA ACGTATGCCA
4551 CCTGTTTGCA GAGCATGACC CCGAGCAACC TGCCAGTGCC ATTGTCAACT
4601 TTGTGTCAAA GGTGATGATT GGCTCCCCTA AGAAGATCTG Agccttctct
4651 agccaaacct gccagatgcc tcatagggcc ctcaacatgg cagtgggggtg
4701 aggcagggcc cccattogta ccagattgac aatcttcaca tccagactc
4751 aaagagga gaagaatag acaactcttc aaaccaagaa caaacaatgt
4801 caccactgac tggccttaaa gaagctgctc ttccgacaca cctatatagt
4851 caggcgcat ttgagtggat ggatcttggc cgggaaatg cctcatcagg
4901 gccccaagga caagggtgtg acaaggaggg agcatggaag acaaggctgt
```

### Query sequence for CRISPOR:

TTGTGTCAAAGGTCATGATTGGCTCCCCTAAGAAGATCTGAgccttctctagccaacctgccagatgcctcatagggcctcaacatggcagtgagggtga

**TCATGATTGGCTCCCCT** sequence also present in chr12:100150650-100150682> avoid to use it in the gRNA

1. Guide sequence: **GGCCCTATGAGGCATCTGGC** AGG
2. Guide sequence: **TATGAGGCATCTGGCAGGTT** TGG
3. Guide sequence: **TCTGGCAGGTTGGCTAGGA** AGG > more efficiently cutting gRNA

TTGTGTCAAAGGTCATGATTGGCTCCCCTAAGAAGATCTGAgccttctctagccaacctgccaacatggcagtgagggtgaggcag  
ggcccccatctgtaccagattgacaatcttcacattccagactcaacaagaggagaagaatagacaactcttcaaccaagaacaacaatgtcaccactgactgg  
ccttaaagaagctgctctccgacacacctatagtcaggcgcatcttgagtggatggatcttggcccgggaaatgcctcatcagggcccccaaggacaagggtgtg  
acaaggaggagcatggaagacaaggctgt

**Mus musculus (mm10) sequence found at chr11:8434434-8434534**

Found 16 possible guide sequences in input (100 bp). Click on a PAM NGG match to show its guide sequence.

Shown below are the PAM site and the expected cleavage position located ~3bp 5' of the PAM site.

Colors **green**, **yellow** and **red** indicate high, medium and low specificity of the PAM's guide sequence in the genome.

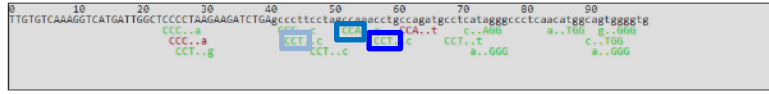

**Predicted guide sequences for PAMs**

Ranked by default from highest to lowest specificity score (Hsu et al., Nat Biotechnol 2013) as on <http://crispr.mit.edu>.

Please cite the source when you use a score: Fusi, Chari, Xu, Doench, Wang, Moreno-Mateos, Housden, Prox, GC, -GG, Out-of-Frame

Our recommendation: Use Fusi for mammals, Moreno-Mateos for Zebrafish. Click on a column title to rank by its score.

| Position/<br>Strand | Guide Sequence + PAM<br>Restriction Enzymes | Specificity<br>Score | Predicted Efficiency |       |      |        |      |               |         | Out-<br>of-<br>Frame | Off-targets for<br>0-1-2-3-4<br>mismatches<br>+ next to PAM | Genome Browser links to match<br>exons only chr11 only |                                                                                                              |
|---------------------|---------------------------------------------|----------------------|----------------------|-------|------|--------|------|---------------|---------|----------------------|-------------------------------------------------------------|--------------------------------------------------------|--------------------------------------------------------------------------------------------------------------|
|                     |                                             |                      | Fusi                 | Chari | Xu   | Doench | Wang | Moreno-Mateos | Housden |                      |                                                             |                                                        | Prox GC                                                                                                      |
| 88 / fw             | CCCTCTAGGCCCTCATA AGG<br>PCR primers        | 86                   | 60                   | 75    | -0.3 | 19     | 61   | 36            | 3       | -                    | 65                                                          | 0-0-2-5-77<br>0-0-0-0-0                                | 2 exon Spbar1<br>2 intron Clf<br>2 intron Rims3<br>show all...                                               |
| 69 / rev            | CCATTTAAGGCCCTATA AGG<br>PCR primers        | 85                   | 57                   | 87    | -0.1 | 17     | 51   | 51            | 5       | -                    | 70                                                          | 0-0-0-4-79<br>0-0-0-1-1                                | 2 exon Spbar1<br>2 intergenic Tcb17-Gm23926<br>4 intron Zfp19<br>show all...                                 |
| 76 / fw             | AACCTGCGAATGCTCATA AGG<br>PCR primers       | 79                   | 54                   | 30    | -0.2 | 30     | 34   | 58            | 5       | -                    | 82                                                          | 0-0-0-16-95<br>0-0-0-2-1                               | 3 intergenic mmo4-79-Gm6214<br>3 intergenic Tl8-Gm16499-Gm22910<br>3 intergenic Ncam2-Gm23955<br>show all... |
| 58 / rev            | CCCTCTAAGCCCTCATA AGG<br>PCR primers        | 77                   | 51                   | 75    | -0.2 | 17     | 55   | 22            | 4       | +                    | 65                                                          | 0-0-1-6-114<br>0-0-0-0-1                               | 3 intergenic Gm25914-Epha4<br>2 intron Csk10<br>4 intergenic Trn-Mrps14<br>show all...                       |
| 53 / rev            | TATGAGCCTCTGCAAGTT AGG<br>PCR primers       | 75                   | 37                   | 9     | -0.4 | 4      | 42   | 67            | 5       | -                    | 63                                                          | 0-0-0-10-107<br>0-0-0-1-2                              | 3 intergenic Zfp11-Gm1101<br>3 intergenic Gm22529-Gpr37<br>3 intergenic Gm26465-Gm5283<br>show all...        |
| 94 / fw             | AAGCCCTCAACAAGGAG AGG<br>PCR primers        | 74                   | 56                   | 67    | 0.8  | 29     | 89   | 57            | 7       | +                    | 61                                                          | 0-0-0-8-92<br>0-0-0-1-7                                | 4 intergenic Nc102-16-18594<br>3 intergenic Cacuso1-Gm8984<br>2 exon Arhgap9/Gat1<br>show all...             |
| 44 / rev            | TCTGCAGGTTGGCTAGGA AGG<br>PCR primers       | 66                   | 41                   | 60    | 0.0  | 1      | 43   | 48            | 6       | -                    | 71                                                          | 0-0-3-19-140<br>0-0-1-2-0                              | 2 intergenic Ptx1-H2afy<br>2 intergenic Gm16026-Sub1<br>2 exon Ejab4-V5<br>show all...                       |

**3. Guide sequence: TCTGGCAGGTTGGCTAGGA AGG > best gRNA cutting efficiency**

validation Primers

|                    |                     |           |
|--------------------|---------------------|-----------|
| guideRna44revLeft  | AGCCTTGCTTCCATGCTCC | Tm 60.035 |
| guideRna44revRight | TGCTTGGCACATCGTAACT | Tm 59.964 |

Genomic fragment with validation primers and guide sequence

Genomic sequence chr11:8434468-8434491 including primers, forward strand:

AGCCTTGCTTCCATGCTCC CTCCTTGACAGCCCTTGTCTTGGGGCCCTGATGAGGCATTTCCCGGCCAAGATCCATCCACTCAAATGCGCCTGACTAT ATAGGTGTGTCGGAAGAGCAGCTTCTTAAGGCCAGTCAGTGGTGACATTGTTGTCTTGGTTGAAGAGTTGCATATCTTCTCCTCTGTTGAGTCTG GAATGTGAAGATTGCAATCTGGTACGAATGGGGCCCTGCCTCACCCACTGCCATGTTGAGGGCCCTATGAGGCATCTGGCAGGTTGGCTAGGAAGG GCTCAGATCTTCTAGGGGAGCCAATCATGACCTTTGACACAAAGTTGACAATGGCACTGGCAGGTTGCTCGGGTTCATGCTCTGCAAACAGGTGGCATA C GTTGTCTGTAGCACTGCCCTGTTCCGGGCCACAAATCCAAGACTCTGCAAGAGACAAGTCTAGTCAGAGGAGCCAGTACCGTGTGCAGCAAGCACCAT GCATGCATGCAGGCTTCTTCTCCTCATGATAGCAACCTGGGAACAGTACAGACTGCCCTTGC AGGTTACGATGTGCCAAGCA

Sequence length: 588

Method: Primer3.2 with default settings, target length 500-700 bp

**Expression of guide RNA**

Summary of all primers explained below

|                            |                                                                              |
|----------------------------|------------------------------------------------------------------------------|
| guideRna44revT7sense       | TAGGTCTGGCAGGTTGGCTAGGA                                                      |
| guideRna44revT7antisense   | AAACTCTAGCCAAACCTGCCAGA                                                      |
| guideRNA44revT7PromSense   | TAATACGACTCACTATAGGTCTGGCAGGTTGGCTAGGAGTTTTAGAGCTAGAAATAGCAAG                |
| guideRNAallT7PromAntisense | AAAAGCACGACTCGGTGCCACTTTTCAAGTTGATAACGGACTAGCCTATTTTAACTGCTATTTCTAGCTCTAAAAC |
| guideRNA44revU6sense       | ACACCTCTGGCAGGTTGGCTAGGAG                                                    |
| guideRNA44revU6antisense   | AAAACTCTAGCCAAACCTGCCAGACG                                                   |
