# Supplementary material for: Transient regulation of focal adhesion via Tensin3 is required for nascent oligodendrocyte differentiation
Source: eLife. 2022 Oct 10;11:e80273. doi: 10.7554/eLife.80273 (PMC9596163; doi:10.7554/eLife.80273)
Supplement: Source data 1. [file elife-80273-data1.xlsx]

## Sheet: Statistics
Figure	Test used	n	Descriptive stats	P value	Comments
Fig. 1F	two-tailed unpaired Student’s t test	7 Ctrl and 5 iKO	mean ± s.e.m.	P = 0,0003
Fig. 1G	two-tailed unpaired Student’s t test	3 Ctrl and 3 iKO	mean ± s.e.m.	P = 0,006
Fig. 3D	One- way ANOVA; multiple comparisons with Turkey’s test	9 Ctrl, 4 gRNA#1 and 5 gRNA #2	mean ± s.e.m.	3 groups with a df of 15. For 5% error, the critical q 3,673 OPCs: qEmpty vs qgRNA#1= 1,801, qEmpty vs qsgRNA#2= 7,002, qsgRNA#1 vs qsgRNA#2= 8,064; Ols: qEmpty vs qgRNA#1= 6,542, qEmpty vs qsgRNA#2= 9,881, qsgRNA#1 vs qsgRNA#2= 2,296; Astrocytes: qEmpty vs qgRNA#1= 13,963, qEmpty vs qsgRNA#2= 10,363, qsgRNA#1 vs qsgRNA#2= 4,694	ANOVA: p value (OPCs): 0,0000338; p value (Ols): 0,00000193; p value (Astrocytes): 0,000117
Fig. 3E	two-tailed unpaired Student’s t test	3 Ctrl, 3 gRNA #2	mean ± s.e.m.	OPCs: P = 0.860 ; Ols: P = 0.026 ; Astrocytes: P =0.636
Fig. 3I	two-tailed unpaired Student’s t test	5 Ctrl and 4 gRNA 3'-5'	mean ± s.e.m.	OPCs: P = 0.486 ; Ols: P = 0.0016 ; Astrocytes: P =0.0269
Fig. 4D	two-tailed unpaired Student’s t test	Corpus Callosum and Fimbria: 5 Ctrl and 4 Tns3flox; Cortex: 7 Ctrl and 4 Tns3flox; Striatum: 4 Ctrl and 4 Tns3flox;	mean ± s.e.m.	Corpus Callosum: OPCs P = 0.689, Ols P = 0.00048; Fimbria: OPCs P = 0.684, Ols P = 0.0144; Cortex: OPCs P = 0.882, Ols P = 7.294 E-5; Striatum: OPCs P = 0.147, Ols P = 0.0071;
Fig. 4F	two-tailed unpaired Student’s t test	7 Ctrl, 8 Tns3 iKO	mean ± s.e.m.	Corpus Callosum: OPCs P = 0.803, iOls1 P = 0.109, iOls2-mOls P = 0.000936; Fimbria: OPCs P = 0.536, iOls1 P = 0.0302, iOls2-mOls P = 0.00042; Cortex: OPCs P = 0.759, iOls1 P = 0.0053, iOls2-mOls P = 0.0017; Striatum: OPCs P = 0.559, iOls1 P = 0.001, iOls2-mOls P =0.0274;
Fig. 5C	two-tailed unpaired Student’s t test	3 Ctrl, 4 Tns3 iKO	c	SVZ: P = 0.0450 ; Cortex: P = 0.0165 ; Dorsal: P = 0.02
Fig. 5F	two-tailed unpaired Student’s t test	4 Cre+ GFP-, 4 Cre+ GFP+	mean ± s.e.m.	24h diff: P = 0.606; 48h diff: P = 0.077; 72h diff: P = 0.00840
Fig. 5G	One- way ANOVA; multiple comparisons with Turkey’s test	4 Cre- Ctl, 6 Cre+ GFP-, 7 Cre+ GFP+	mean ± s.e.m.	3 groups with a df of 14. For 5% error, the critical q 3,701 qCre- vs qCre+GFP-= 0,104, qCre- vs qCre+GFP+ = 8,924, qCre+GFP- vs qCre+GFP+ = 11,057	ANOVA p value: 1,292 E-06
Fig. 6C	two-tailed unpaired Student’s t test	3 Ctrl, 3Tns3 iKO	mean ± s.e.m.	OPC CC1-: P = 0.0024; Ols CC1+: P = 0.0790
Fig. 7E	Differential expression tests	5 Ctrl, 3Tns3 iKO	LogFC	Olig2, P > 0.05; Pdgfra, P < 0.05; Sox8, P < 0.001; Sox10, P < 0.05; Sirt2, P < 0.05; Nkx2.2, P < 0.001; Gpr17, P < 0.01; Bcas1, P < 0.001; BMP, P < 0.01; CNP, P > 0.05; MOG, P > 0.05; Id2, P > 0.05; Id4, P > 0.05; Bmp4, P > 0.05;	using EdgeR quasi-likelihood pipeline from Chen & Smyth 2020
Fig. 7F	Differential expression tests	5 Ctrl, 3Tns3 iKO	LogFC	Ccna1, P < 0.05; Ccna2, P < 0.05; Ccnb1, P < 0.001; Ccnb2, P < 0.001; Ccnd1, P < 0.01; Ccnd2, P < 0.001; Ccne1, P < 0.05; Ccne2, P < 0.001; Cdk1, P < 0.001; Cdk2, P < 0.05; Cdk6, P < 0.05; Cdkn1a (P21), P < 0.05; Cdkn1b (P27), P > 0.05; Cdkn1c (P57), P < 0.01; Cdkn2a (P16), P > 0.05; Cdkn2b (P15), P < 0.01; Cdkn2c (P18), P < 0.001; Cdkn2d (P19), P > 0.05; Cdkn3, P < 0.01;	using EdgeR quasi-likelihood pipeline from Chen & Smyth 2020
Fig. 7G	Differential expression tests	5 Ctrl, 3Tns3 iKO	LogFC	Eda2R, P < 0,001; Pidd1, P < 0,001; Foxm1, P < 0,05; E2f7, P < 0,001; Brca2 < 0,05; Cdkn1a, < 0,001; Chek2 < 0,05; Aen < 0,05; Pmaip1 (Noxa), < 0,001; E2f1, P < 0,01; Atad5, P < 0,001; Bbc3 (Puma), P < 0,001; Sesn2, P < 0,001; Phlda3, P < 0,01; Apaf1, P < 0,001; Atm, P < 0,05; Tmem109, P < 0,05; Zfp385a, P < 0,05;	using EdgeR quasi-likelihood pipeline from Chen & Smyth 2020
Fig. S8E	two-tailed unpaired Student’s t test	3 Tns3bgeo/+ and 3 Tns3bgeo/bgeo	mean ± s.e.m.	Corpus Callosum Pdgfra P = 0,137, CC1 P = 0,419; Fimbria Pdgfra P = 0,629, CC1 P = 0,265
Fig. S8G	two-tailed unpaired Student’s t test	3 Tns3bgeo/+ and 3 Tns3bgeo/bgeo	mean ± s.e.m.	Corpus Callosum iOls1 P = 0,408, iOls2 P = 0,166, mOls P = 0,799; Fimbria iOls1 P = 0,285, iOls2 P = 0,222, mOls P = 0,528
Fig. S12C	two-tailed unpaired Student’s t test	5 Ctrl, 5 Tns3 iKO	mean ± s.e.m.	Corpus Callosum P = 0.0176; Cortex P = 0.00246; Fimbria P = 0.00157; Striatum P = 0.0116
Fig. S12D	two-tailed unpaired Student’s t test	5 Ctrl, 5 Tns3 iKO	mean ± s.e.m.	Corpus Callosum P = 0.0301; Cortex P = 0.218; Fimbria P = 0.693; Striatum P = 0.527
Fig. S13D	two-tailed unpaired Student’s t test	6 Ctrl, 5 Tns3 iKO	mean ± s.e.m.	Corpus Callosum P = 0.216; Fimbria P = 0.146
Fig. S15C	two-tailed unpaired Student’s t test	5 Ctrl, 3 Tns3 iKO	mean ± s.e.m.	P = 0,0135
Fig. S15E	two-tailed unpaired Student’s t test	3 Ctrl, 3 Tns3 iKO	mean ± s.e.m.	Pdgfra P = 0,290, CNPase P = 0,296
Fig. S15F	two-tailed unpaired Student’s t test	3 Ctrl, 3 Tns3 iKO	mean ± s.e.m.	P = 0,288
