# Supplementary material for: Transient regulation of focal adhesion via Tensin3 is required for nascent oligodendrocyte differentiation
Source: eLife. 2022 Oct 10;11:e80273. doi: 10.7554/eLife.80273 (PMC9596163; doi:10.7554/eLife.80273)
Supplement: Supplementary file 1. [file elife-80273-supp1.xlsx]

## Sheet: Content_table
Table	Content
Table 1	List of key regulators of oligodendrocyte differentiation bound by Olig2 in OPCs/iOLs by ChIP-seq
Table 2	List of protein coding genes commonly bound by Olig2, Chd7, and Chd8 by ChIP-seq in purified OPCs/iOLs
Table 3	Markers of different clusters shown in figure S2 comprising neural progenitors and oligodendroglial cells
Table 4	Gene Ontology Biological Processes enriched in downregulated genes in Tns3iKO OPCs/iOLs compared to controls
Table 5	Gene Ontology Biological Processes enriched in upregulated genes in Tns3iKO OPCs/iOLs compared to controls
Table 6	Statistics and expression levels (counts per million) of all genes detected in purified OPCs/iOLs, when comparing Tns3iKO and control cells

## Sheet: Table1_Olig2_ChIP-seq
List of key regulators of oligodendrocyte differentiation bound by Olig2 in OPCs/iOLs by ChIP-seq
A1Cf
A2M
A4Galt
Aaas
Aacs
Aagab
Aak1
Aamp
Aar2
Aars2
Aasdh
Aatk
Abca1
Abca13
Abca2
Abca3
Abca7
Abcb10
Abcb4
Abcb5
Abcb6			T
Abcb9
Abcc1
Abcc10
Abcc3
Abcc4
Abcc5
Abcc8
Abcc9
Abcd2
Abcf1
Abcf2
Abcg1
Abcg4
Abhd10
Abhd11
Abhd13
Abhd14B
Abhd15
Abhd17B
Abhd18
Abhd2
Abhd8
Abi2
Abi3
Abitram
Ablim1
Ablim2
Ablim3
Abr
Abracl
Abtb1
Abtb2
Acaa2
Acaca
Acacb
Acad8
Acads
Acan
Acap2
Acap3
Acat1
Acat2
Acbd3
Acbd4
Acbd5
Acbd6
Accs
Accsl
Ace
Ache
Acly
Aco1
Aco2
Acot11
Acot12
Acot13
Acot2
Acot7
Acot8
Acox1
Acp5
Acp6
Acr
Acsbg2
Acsf2
Acsf3
Acsl1
Acsl6
Acss1
Acss2
Acta1
Actb
Actg1
Actg2
Actl6A
Actn1
Actn2
Actn3
Actn4
Actr3
Actr3B
Actr5
Actr8
Actrt2
Actrt3
Acvr1B
Acvr1C
Acvr2B
Acvrl1
Acyp1
Ada
Adam11
Adam12
Adam15
Adam17
Adam18
Adam19
Adam22
Adam32
Adam33
Adam8
Adam9
Adamts1
Adamts13
Adamts14
Adamts17
Adamts18
Adamts19
Adamts2
Adamts20
Adamts3
Adamts4
Adamts5
Adamts7
Adamts9
Adamtsl2
Adamtsl3
Adamtsl5
Adap2
Adar
Adat1
Adck2
Adcy1
Adcy3
Adcy4
Adcy5
Adcy6
Adcy7
Adcy8
Adcy9
Adcyap1
Adcyap1R1
Add2
Add3
Adgb
Adgra1
Adgra2
Adgrb1
Adgrb2
Adgrb3
Adgre5
Adgrg1
Adgrg6
Adgrl1
Adgrl2
Adgrl3
Adgrv1
Adh5
Adhfe1
Adi1
Adig
Adipor1
Adipor2
Adk
Adm
Adnp2
Ado
Adora1
Adora2A
Adora2B
Adpgk
Adprm
Adra1A
Adra1B
Adra1D
Adra2A
Adra2B
Adra2C
Adrb1
Adrb3
Adrm1
Aebp1
Aebp2
Aen
Afap1
Afap1L1
Afap1L2
Afdn
Aff1
Aff3
Aff4
Afg3L2
Afm
Afmid
Afp
Aftph
Agap1
Agap2
Agap3
Agbl3
Agfg1
Agfg2
Agk
Agmo
Ago1
Ago2
Ago3
Agpat1
Agpat2
Agpat3
Agpat4
Agpat5
Agrn
Agtr2
Agtrap
Agxt
Ahcy
Ahcyl2
Ahdc1
Ahnak
Ahnak2
Ahsa1
Aicda
Aif1
Aif1L
Aifm3
Aim2
Aip
Aipl1
Aire
Ajap1
Ajm1
Ajuba
Ak1
Ak2
Ak3
Ak4
Ak5
Ak8
Ak9
Akain1
Akap1
Akap10
Akap12
Akap13
Akap5
Akap6
Akap8L
Akirin1
Akirin2
Akna
Akt1
Akt1S1
Akt2
Akt3
Aktip
Alad
Alas1
Alb
Alcam
Aldh16A1
Aldh1A2
Aldh1A3
Aldh1B1
Aldh1L2
Aldh3A1
Aldh3B1
Aldh4A1
Aldh9A1
Aldoa
Aldoc
Alg10B
Alg11
Alg12
Alg13
Alg14
Alk
Alkal2
Alkbh3
Alkbh4
Alkbh5
Alkbh6
Alox12
Alox15
Alox5Ap
Alpi
Alpk1
Alpl
Alx1
Alx3
Alx4
Alyref
Ambp
Ambra1
Amd1
Amdhd1
Amdhd2
Amelx
Amer2
Amer3
Amfr
Amh
Amhr2
Amigo1
Ammecr1L
Amn
Amn1
Amotl1
Amotl2
Ampd3
Amt
Amz1
Amz2
Anapc10
Anapc11
Anapc13
Anapc15
Anapc16
Anapc2
Anapc5
Ang
Angel1
Angptl2
Angptl4
Angptl6
Ank2
Ank3
Ankdd1A
Ankef1
Ankfy1
Ankhd1
Ankk1
Ankle1
Ankle2
Ankmy2
Ankra2
Ankrd10
Ankrd11
Ankrd13A
Ankrd13B
Ankrd13D
Ankrd16
Ankrd2
Ankrd22
Ankrd24
Ankrd27
Ankrd28
Ankrd33
Ankrd34A
Ankrd34B
Ankrd35
Ankrd37
Ankrd40
Ankrd42
Ankrd44
Ankrd45
Ankrd49
Ankrd52
Ankrd53
Ankrd54
Ankrd6
Ankrd60
Ankrd63
Ankrd7
Anks1B
Anks3
Ankzf1
Anln
Ano10
Ano4
Ano5
Ano6
Ano8
Anp32A
Anp32E
Anxa6
Aopep
Ap1Ar
Ap1G2
Ap1M1
Ap2B1
Ap2M1
Ap3B2
Ap3D1
Ap3M2
Ap3S1
Ap3S2
Ap4B1
Ap4M1
Ap5B1
Ap5S1
Apaf1
Apba1
Apba2
Apba3
Apbb1
Apbb2
Apbb3
Apc
Apc2
Apeh
Aph1A
Aplp1
Apmap
Apoa1
Apobec1
Apoc3
Apod
Apoe
Apoh
Apold1
App
Appl2
Aprt
Aqp1
Aqp2
Aqp3
Aqp5
Aqp6
Aqp7
Ar
Arap1
Arap3
Arc
Arcn1
Areg
Arf1
Arf4
Arf6
Arfgap1
Arfgap2
Arfgef1
Arfrp1
Arhgap1
Arhgap10
Arhgap11A
Arhgap12
Arhgap15
Arhgap17
Arhgap18
Arhgap19
Arhgap21
Arhgap22
Arhgap23
Arhgap24
Arhgap26
Arhgap27
Arhgap29
Arhgap31
Arhgap33
Arhgap35
Arhgap39
Arhgap40
Arhgap42
Arhgap44
Arhgap6
Arhgap9
Arhgdia
Arhgdig
Arhgef1
Arhgef10
Arhgef10L
Arhgef12
Arhgef15
Arhgef16
Arhgef17
Arhgef18
Arhgef19
Arhgef2
Arhgef25
Arhgef26
Arhgef28
Arhgef3
Arhgef33
Arhgef39
Arhgef4
Arhgef40
Arhgef6
Arid1A
Arid1B
Arid2
Arid3A
Arid3B
Arid3C
Arid4B
Arid5B
Arl10
Arl14
Arl14Ep
Arl15
Arl2
Arl2Bp
Arl3
Arl4A
Arl4C
Arl5C
Arl6Ip1
Arl6Ip4
Arl8A
Arl8B
Armc5
Armc6
Armc7
Armc8
Armc9
Arnt
Arnt2
Arntl
Arntl2
Arpc1B
Arpc3
Arpc5
Arpc5L
Arpin
Arpp19
Arpp21
Arrb1
Arrb2
Arrdc2
Arrdc3
Arrdc4
Arsa
Arsb
Arsg
Arsi
Arsj
Arsk
Art3
Artn
Arvcf
Arx
As3Mt
Asah1
Asah2
Asap1
Asap2
Asap3
Asb10
Asb13
Asb15
Asb16
Asb17
Asb18
Asb2
Asb3
Asb6
Asb8
Ascc1
Ascc2
Ascl1
Ascl2
Ascl5
Asf1B
Ash1L
Asic1
Asic2
Asic4
Aspdh
Aspg
Asphd1
Asphd2
Aspscr1
Asrgl1
Ass1
Aste1
Asxl1
Asxl2
Asxl3
Atad1
Atad2
Atad3A
Atad5
Atat1
Atcay
Atf1
Atf3
Atf5
Atf6B
Atf7
Atf7Ip
Atf7Ip2
Atg101
Atg16L2
Atg2A
Atg4B
Atg4C
Atg5
Atg7
Atg9B
Atl1
Atl2
Atn1
Atoh1
Atoh7
Atoh8
Atox1
Atp10A
Atp10D
Atp11A
Atp13A2
Atp1A1
Atp1A2
Atp1A3
Atp1A4
Atp1B1
Atp1B2
Atp1B3
Atp2A2
Atp2B1
Atp2B2
Atp2B4
Atp2C1
Atp2C2
Atp4A
Atp6V0B
Atp6V1A
Atp6V1B1
Atp6V1C1
Atp6V1F
Atp6V1G2
Atp6V1H
Atp8A2
Atp8B1
Atp8B2
Atp8B3
Atp9A
Atp9B
Atpaf2
Atpsckmt
Atraid
Atrnl1
Atxn1
Atxn2
Atxn2L
Atxn7
Atxn7L1
Atxn7L3B
Auh
Aup1
Aurkaip1
Aurkb
Auts2
Avil
Avp
Avpi1
Avpr1A
Axin1
Axin2
Axl
Azin1
Azin2
B3Galt1
B3Galt5
B3Galt6
B3Gat1
B3Gat2
B3Gat3
B3Gnt3
B3Gnt4
B3Gnt6
B3Gnt7
B3Gnt9
B3Gntl1
B4Galnt1
B4Galnt2
B4Galnt4
B4Galt1
B4Galt2
B4Galt3
B4Galt4
B4Galt5
B4Galt7
B4Gat1
B9D1
B9D2
Bace1
Bach2
Bad
Bag1
Bag2
Bag3
Bag5
Bag6
Bahcc1
Bahd1
Baiap2
Baiap2L1
Baiap2L2
Baiap3
Bambi
Banf2
Barhl1
Barhl2
Barx1
Barx2
Batf3
Baz1B
Baz2A
Baz2B
Bbc3
Bbip1
Bbs1
Bbs10
Bbs12
Bbs2
Bbs4
Bbx
Bcam
Bcan
Bcap29
Bcar1
Bcar3
Bcas1
Bcas2
Bcat1
Bcat2
Bcdin3D
Bckdk
Bcl10
Bcl11A
Bcl11B
Bcl2
Bcl2L1
Bcl2L11
Bcl2L12
Bcl2L2
Bcl6B
Bcl7A
Bcl7B
Bcl7C
Bcl9
Bcl9L
Bclaf1
Bcor
Bcs1L
Bdh1
Bdnf
Bean1
Becn1
Begain
Bend5
Bend6
Best1
Best3
Bex2
Bfar
Bglap
Bhlhb9
Bhlhe22
Bhlhe40
Bhlhe41
Bicc1
Bicd1
Bicd2
Bicdl1
Bicral
Bid
Bik
Bin3
Birc2
Birc3
Birc5
Birc6
Birc7
Blk
Bloc1S1
Bloc1S3
Bloc1S5
Blvrb
Blzf1
Bmf
Bmi1
Bmp2
Bmp3
Bmp4
Bmp5
Bmp8A
Bmp8B
Bmper
Bmpr1A
Bmpr1B
Bmpr2
Bms1
Bmt2
Bnc2
Bnip3
Bnip3L
Boc
Bod1
Bok
Bola1
Bola2
Bop1
Borcs5
Borcs6
Borcs7
Borcs8
Bpgm
Bphl
Bpi
Bpifb2
Bpifb3
Bpifb4
Bpifb6
Braf
Brat1
Brca1
Brd2
Brd3
Brd7
Brd8
Brdt
Brf2
Bri3Bp
Brinp1
Brinp2
Brk1
Brms1
Brox
Brpf1
Brpf3
Brsk2
Bscl2
Bsdc1
Bspry
Bst2
Bsx
Btaf1
Btbd1
Btbd10
Btbd11
Btbd16
Btbd17
Btbd19
Btbd2
Btd
Btf3
Btg1
Btg2
Bub1
Bub1B
Bub3
Bud13
Bves
Bysl
Bzw1
C1D
C1Ql1
C1Ql2
C1Ql3
C1Ql4
C1Qtnf1
C1Qtnf4
C1Qtnf6
C2Cd2L
C2Cd3
C2Cd4A
C2Cd4B
C2Cd4C
C2Cd4D
C3
C3Ar1
C8G
Cab39
Cabin1
Cables2
Cabp1
Cabp4
Cabp7
Cacfd1
Cachd1
Cacna1A
Cacna1B
Cacna1C
Cacna1D
Cacna1E
Cacna1G
Cacna1H
Cacna1I
Cacna2D2
Cacna2D3
Cacna2D4
Cacnb2
Cacnb3
Cacnb4
Cacng2
Cacng3
Cacng4
Cacng5
Cacng6
Cacng7
Cactin
Cacul1
Cadm1
Cadm2
Cadm4
Cadps
Cadps2
Calcoco1
Calcoco2
Calcr
Calhm1
Calhm2
Calhm6
Calm1
Calm2
Calm3
Caln1
Calr
Calu
Caly
Camk1
Camk1D
Camk1G
Camk2A
Camk2B
Camk2D
Camk2N1
Camk2N2
Camk4
Camkk1
Camkk2
Camkv
Camsap2
Camta1
Camta2
Cand1
Cand2
Cant1
Canx
Cap1
Cap2
Capn1
Capn12
Capn15
Capn5
Capn7
Caprin1
Caprin2
Caps2
Capzb
Card10
Card11
Card14
Card19
Carf
Carhsp1
Carm1
Carmil1
Carmil2
Carmil3
Carns1
Cars2
Cartpt
Casc3
Casd1
Caskin2
Casp14
Casp3
Casp7
Casp9
Casq2
Castor2
Casz1
Cav1
Cavin1
Cavin3
Cbarp
Cbfa2T2
Cbfa2T3
Cbfb
Cblb
Cbll1
Cbln1
Cbln2
Cbln4
Cbr3
Cbr4
Cbs
Cbwd1
Cbx1
Cbx2
Cbx3
Cbx4
Cbx5
Cbx6
Cbx7
Cbx8
Cby1
Cc2D1A
Ccar1
Ccar2
Ccdc102A
Ccdc103
Ccdc105
Ccdc106
Ccdc107
Ccdc110
Ccdc113
Ccdc115
Ccdc116
Ccdc117
Ccdc12
Ccdc121
Ccdc124
Ccdc126
Ccdc13
Ccdc134
Ccdc136
Ccdc137
Ccdc142
Ccdc146
Ccdc149
Ccdc15
Ccdc157
Ccdc158
Ccdc166
Ccdc167
Ccdc17
Ccdc171
Ccdc177
Ccdc18
Ccdc181
Ccdc184
Ccdc186
Ccdc187
Ccdc25
Ccdc27
Ccdc28A
Ccdc32
Ccdc33
Ccdc38
Ccdc40
Ccdc43
Ccdc47
Ccdc50
Ccdc51
Ccdc6
Ccdc61
Ccdc63
Ccdc65
Ccdc71L
Ccdc74A
Ccdc77
Ccdc8
Ccdc85A
Ccdc85B
Ccdc85C
Ccdc86
Ccdc88B
Ccdc88C
Ccdc93
Ccdc96
Ccdc97
Ccdc9B
Cchcr1
Cck
Ccl1
Ccl11
Ccl19
Ccl2
Ccl25
Ccl4
Ccl5
Ccl7
Ccm2
Ccm2L
Ccna1
Ccnb1Ip1
Ccnb2
Ccnd1
Ccnd3
Ccne1
Ccne2
Ccnf
Ccng1
Ccng2
Ccnh
Ccni
Ccnj
Ccnjl
Ccnk
Ccnl1
Ccnl2
Ccno
Ccnq
Ccnt1
Ccny
Ccnyl1
Ccp110
Ccpg1
Ccr6
Ccr7
Ccr8
Ccrl2
Ccs
Cct2
Cct3
Cct4
Cct6A
Cct7
Cd109
Cd151
Cd164
Cd164L2
Cd180
Cd2
Cd207
Cd247
Cd248
Cd276
Cd2Ap
Cd2Bp2
Cd300A
Cd300E
Cd300Lb
Cd300Lf
Cd320
Cd37
Cd38
Cd40
Cd63
Cd68
Cd7
Cd70
Cd80
Cd81
Cd82
Cd83
Cd9
Cd96
Cda
Cdadc1
Cdc123
Cdc14A
Cdc14B
Cdc16
Cdc20
Cdc23
Cdc25B
Cdc25C
Cdc26
Cdc34
Cdc37
Cdc37L1
Cdc42
Cdc42Ep1
Cdc42Ep3
Cdc42Ep4
Cdc42Se1
Cdc42Se2
Cdc45
Cdc7
Cdc73
Cdca3
Cdca4
Cdca5
Cdca7L
Cdca8
Cdcp1
Cdh1
Cdh10
Cdh11
Cdh13
Cdh15
Cdh18
Cdh2
Cdh20
Cdh22
Cdh23
Cdh24
Cdh3
Cdh4
Cdh6
Cdhr1
Cdhr2
Cdhr3
Cdk1
Cdk10
Cdk12
Cdk13
Cdk17
Cdk19
Cdk20
Cdk2Ap1
Cdk2Ap2
Cdk3
Cdk4
Cdk5
Cdk5R1
Cdk5R2
Cdk5Rap1
Cdk5Rap3
Cdk6
Cdk8
Cdk9
Cdkl1
Cdkl2
Cdkl3
Cdkn1B
Cdkn1C
Cdkn2A
Cdkn2Aip
Cdkn2Aipnl
Cdkn2B
Cdkn2C
Cdkn2D
Cdnf
Cdo1
Cdon
Cdr2L
Cds1
Cds2
Cdt1
Cdx2
Cdyl
Cebpa
Cebpb
Cebpg
Cebpz
Cecr2
Cela3B
Celf1
Celf3
Celf4
Celf5
Celf6
Celsr1
Celsr2
Cemip
Cend1
Cenpb
Cenpf
Cenpj
Cenpl
Cenpm
Cenpn
Cenpo
Cenpq
Cenps
Cenpt
Cenpv
Cep104
Cep120
Cep126
Cep131
Cep152
Cep162
Cep164
Cep170B
Cep19
Cep250
Cep44
Cep57
Cep57L1
Cep68
Cep70
Cep83
Cep85
Cep89
Cep95
Cep97
Cercam
Cerk
Cers2
Cers4
Cers5
Cers6
Cfap20
Cfap221
Cfap410
Cfap43
Cfap58
Cfap61
Cfap77
Cfap97
Cfap97D1
Cfap99
Cfb
Cfd
Cfl2
Cflar
Cggbp1
Cgn
Ch25H
Chac1
Chadl
Chaf1A
Chaf1B
Champ1
Chat
Chchd1
Chchd10
Chchd2
Chchd6
Chchd7
Chd1L
Chd3
Chd4
Chd5
Chd8
Chd9
Chek2
Chfr
Chgb
Chic2
Chid1
Chl1
Chmp5
Chmp6
Chn1
Chn2
Chodl
Chordc1
Chpf
Chpf2
Chpt1
Chrac1
Chrd
Chrdl2
Chrm1
Chrm3
Chrm4
Chrna4
Chrna5
Chrnb2
Chrnb4
Chrnd
Chrng
Chst1
Chst11
Chst12
Chst15
Chst2
Chst3
Chst5
Chst8
Chsy3
Chtf18
Chtop
Ciao2B
Ciapin1
Ciart
Cib1
Cic
Cidea
Cideb
Cilk1
Cilp2
Cip2A
Cipc
Cirbp
Cisd1
Cisd2
Cisd3
Cish
Cit
Cited2
Cited4
Ciz1
Ckap4
Ckap5
Ckb
Cklf
Ckm
Cks1B
Cks2
Clasp1
Clasrp
Clba1
Clca1
Clca2
Clcc1
Clcn2
Clcn4
Clcn6
Clcnka
Clcnkb
Cldn1
Cldn10
Cldn11
Cldn12
Cldn14
Cldn23
Cldn3
Cldn4
Cldn5
Clec11A
Clec4F
Clec4G
Clgn
Clic1
Clic4
Clic6
Clip2
Clip3
Clk1
Clk3
Clmp
Cln3
Cln5
Cln6
Cln8
Clnk
Clock
Clpb
Clptm1
Clptm1L
Clspn
Clstn1
Clstn2
Clstn3
Cltb
Cltc
Clybl
Cmas
Cmip
Cmklr1
Cmpk2
Cmss1
Cmtm3
Cmtm4
Cmtm5
Cmtm6
Cmtm8
Cmtr2
Cmya5
Cndp2
Cnfn
Cnga3
Cnga4
Cngb1
Cnih2
Cnih3
Cnih4
Cnksr3
Cnn1
Cnn2
Cnn3
Cnnm1
Cnnm2
Cnnm3
Cnnm4
Cnot1
Cnot10
Cnot3
Cnot7
Cnot9
Cnp
Cnppd1
Cnpy1
Cnpy2
Cnpy4
Cnr1
Cnst
Cntfr
Cntn1
Cntn2
Cntn3
Cntn5
Cntnap1
Cntnap4
Cntrob
Coa3
Coa5
Coa6
Coasy
Coch
Cog1
Cog2
Cog3
Cog4
Col11A1
Col11A2
Col16A1
Col18A1
Col1A1
Col24A1
Col25A1
Col26A1
Col27A1
Col2A1
Col4A1
Col4A2
Col4A5
Col4A6
Col6A2
Col6A3
Col7A1
Col8A1
Col9A2
Col9A3
Colca2
Colec11
Colec12
Colgalt2
Commd2
Commd3
Commd6
Commd7
Comp
Comtd1
Copb2
Copg1
Coprs
Cops3
Cops5
Cops7A
Cops7B
Cops8
Copz1
Copz2
Coq10A
Coq4
Coq5
Coq7
Coq9
Coro1A
Coro1B
Coro1C
Coro2A
Coro2B
Coro6
Coro7
Cort
Cotl1
Cox10
Cox14
Cox16
Cox18
Cox20
Cox4I1
Cox4I2
Cox5A
Cox5B
Cox6B1
Cox6B2
Cox7A2L
Cox7B2
Cox8A
Cpa1
Cpa2
Cpa4
Cpa5
Cpb2
Cpe
Cpeb1
Cpeb2
Cpeb3
Cped1
Cplane1
Cplx2
Cplx3
Cplx4
Cpm
Cpn2
Cpne1
Cpne2
Cpne3
Cpne5
Cpne6
Cpne7
Cpne8
Cpne9
Cpox
Cpped1
Cpq
Cpsf2
Cpsf3
Cpsf4
Cpsf4L
Cpsf6
Cpsf7
Cpt1A
Cpt2
Cptp
Cpvl
Cpxm1
Cpxm2
Cpz
Crabp1
Crabp2
Crat
Crb2
Crcp
Crct1
Creb1
Creb3
Creb3L1
Creb3L2
Creb5
Crebl2
Crebrf
Creg2
Creld1
Crh
Crhbp
Crhr1
Crip1
Crip2
Crip3
Cript
Crispld1
Crispld2
Crkl
Crlf1
Crmp1
Crnkl1
Crnn
Crocc
Crocc2
Crot
Crppa
Crtac1
Crtc1
Cry1
Cry2
Cryaa
Cryba2
Cryba4
Crybb2
Crybb3
Crybg1
Crybg2
Crybg3
Crygn
Cryz
Cs
Csdc2
Csf1R
Csf2
Csf2Ra
Csf3
Csgalnact1
Csk
Csmd1
Csmd2
Csmd3
Csnk1E
Csnk1G1
Csnk1G2
Csnk2A2
Cspg4
Cspg5
Cspp1
Csrnp1
Csrnp2
Csrp1
Csrp2
Cst3
Cstb
Cstf1
Cstf2T
Cstf3
Ctag2
Ctbp1
Ctbs
Ctc1
Ctcf
Ctcfl
Ctdp1
Ctdsp1
Ctdsp2
Cthrc1
Ctif
Ctnna1
Ctnna2
Ctnnal1
Ctnnb1
Ctnnbip1
Ctnnd2
Ctr9
Ctrb1
Ctsa
Ctsb
Ctsd
Ctsl
Ctss
Ctsw
Cttn
Cttnbp2
Cttnbp2Nl
Ctu2
Ctxn1
Cuedc1
Cuedc2
Cul1
Cul2
Cul3
Cul4A
Cul5
Cul7
Cul9
Cuta
Cux1
Cux2
Cwc15
Cwc22
Cwc25
Cwh43
Cx3Cl1
Cx3Cr1
Cxadr
Cxcl1
Cxcl10
Cxcl11
Cxcl12
Cxcl13
Cxcl14
Cxcl16
Cxcl2
Cxcl5
Cxcl9
Cxcr1
Cxcr2
Cxcr4
Cxxc1
Cxxc4
Cxxc5
Cyb561
Cyb561A3
Cyb561D2
Cyb5R1
Cyb5R4
Cyba
Cybb
Cybrd1
Cyc1
Cycs
Cyfip2
Cygb
Cyhr1
Cyld
Cyp11B1
Cyp11B2
Cyp17A1
Cyp1A1
Cyp1A2
Cyp1B1
Cyp26B1
Cyp27A1
Cyp27B1
Cyp2U1
Cyp46A1
Cyp7B1
Cyp8B1
Cys1
Cysltr2
Cysrt1
Cystm1
Cyth1
Cyth4
Cytl1
Daam1
Daam2
Dab1
Dab2Ip
Dach1
Dact3
Dag1
Dagla
Daglb
Dalrd3
Dand5
Dao
Dap
Dapk1
Dapk3
Dars2
Daxx
Dazap1
Dazap2
Dbh
Dbn1
Dbndd1
Dbndd2
Dbnl
Dbp
Dbx1
Dbx2
Dcaf11
Dcaf12
Dcaf12L2
Dcaf15
Dcaf4
Dcaf5
Dcaf8
Dcakd
Dcbld1
Dclk1
Dclre1A
Dcp1A
Dcp1B
Dcp2
Dcps
Dcst2
Dct
Dctd
Dctn2
Dctn3
Dctn4
Dctpp1
Dcun1D4
Dcun1D5
Dcxr
Ddah2
Ddb1
Ddhd1
Ddhd2
Ddias
Ddit3
Ddit4
Ddit4L
Ddn
Ddo
Ddost
Ddr1
Ddx11
Ddx19A
Ddx20
Ddx23
Ddx24
Ddx31
Ddx39B
Ddx3X
Ddx41
Ddx43
Ddx49
Ddx5
Ddx50
Ddx51
Ddx54
Ddx56
Ddx58
Ddx59
Ddx6
Ddx60
Dedd
Dedd2
Def6
Def8
Degs1
Dennd11
Dennd1A
Dennd2A
Dennd2D
Dennd3
Dennd4C
Dennd5A
Dennd5B
Dennd6A
Dennd6B
Depdc1B
Deptor
Derl2
Des
Desi1
Desi2
Det1
Dexi
Dffa
Dgat2
Dgcr2
Dgka
Dgkb
Dgkd
Dgke
Dgkg
Dgkh
Dgki
Dgkk
Dgkq
Dgkz
Dglucy
Dguok
Dhcr24
Dhh
Dhrs11
Dhrs13
Dhrs3
Dhrs7
Dhx16
Dhx30
Dhx34
Dhx35
Dhx36
Dhx37
Dhx58
Dhx8
Dhx9
Diaph1
Dido1
Dimt1
Dio3
Dip2B
Dipk1A
Dipk1C
Dipk2A
Diras1
Diras2
Dis3
Dis3L
Dis3L2
Disc1
Disp1
Disp3
Dixdc1
Dkk3
Dkkl1
Dlat
Dlc1
Dlec1
Dleu7
Dlg1
Dlg2
Dlg5
Dlgap1
Dlgap2
Dlgap3
Dlgap4
Dlgap5
Dlk1
Dlk2
Dll1
Dll3
Dll4
Dlst
Dlx1
Dlx2
Dlx3
Dlx4
Dlx5
Dmac2L
Dmap1
Dmbx1
Dmd
Dmp1
Dmpk
Dmrt1
Dmrt2
Dmrt3
Dmrta1
Dmrta2
Dmtn
Dmwd
Dmxl1
Dmxl2
Dnaaf5
Dnah14
Dnah2
Dnaja1
Dnaja3
Dnaja4
Dnajb1
Dnajb12
Dnajb2
Dnajb5
Dnajb8
Dnajc1
Dnajc10
Dnajc18
Dnajc19
Dnajc22
Dnajc27
Dnajc3
Dnajc30
Dnajc5
Dnajc6
Dnal1
Dnal4
Dner
Dnhd1
Dnlz
Dnm1
Dnm3
Dnmt1
Dnmt3A
Dnpep
Dnph1
Dntt
Dnttip2
Doc2A
Doc2B
Dock1
Dock2
Dock6
Dock9
Dohh
[truncated: 6,673 more rows]

## Sheet: Table2_Common_Olig2_Chd7_Chd8
List of protein coding genes commonly bound by Olig2, Chd7, and Chd8 by ChIP-seq in purified OPCs/iOLs
0610009B22Rik
1700012M20Rik
1700016H03Rik
1700028N14Rik
1700031P21Rik
1700055D18Rik
1700086L19Rik
1700125G22Rik
1810013L24Rik
1810026B05Rik
2010320M18Rik
2310043P16Rik
2610005L07Rik
2610035D17Rik
2900064B18Rik
2900092D14Rik
3110054G05Rik
3110056K07Rik
4831440E17Rik
4833447P13Rik
4930404I05Rik
4930413G21Rik
4930426I24Rik
4930442M18Rik
4930461C15Rik
4930509H03Rik
4930526I15Rik
4930534H18Rik
4930535L15Rik
4930539H15Rik
4930539J05Rik
4930553P13Rik
4930579G24Rik
4931415C17Rik
4931440J10Rik
4932422M17Rik
4933430I17Rik
4933433G15Rik
5830442K09Rik
9130213A22Rik
9130604C24Rik
9330133O14Rik
9430038I01Rik
9530057J20Rik
AA914427
Abcf1
Abhd11
Abtb1
Abtb2
Acap3
Acbd5
Acot8
Actb
Actr3
Adamts1
Add3
Adrm1
Agpat1
Ahsa1
Akap10
Aktip
Alcam
Aldh4a1
Alkbh5
Amz2
Ankrd24
Ankrd40
Ap3d1
Ap3m2
Apaf1
Apba1
App
Appl2
Arhgap35
Arhgef1
Arhgef12
Arid1a
Arid2
Arid4b
Arrb2
Arrdc2
Arrdc3
Asb15
Asxl1
Asxl2
Atf7ip
Atg2a
Atg4c
Atn1
Atp1a2
Atp5b
Atp5d
Atp5g1
Atp5g3
Atp5j
Atp6v1a
Atraid
Atxn2l
AV039307
B430305J03Rik
B930036N10Rik
Bag6
Baz1b
Bbs2
Bbx
BC031361
BC037039
BC037704
BC049715
Bcl10
Bcl7a
Bcs1l
Bdh1
BE691133
Bicral
Birc2
Birc6
Bloc1s1
Bmt2
Bola2
Bpgm
Brca1
Brinp2
Bud13
C030014O09Rik
C920006O11Rik
Cadm1
Calm3
Cap1
Car11
Carf
Casc3
Cbx3
Ccar1
Ccdc115
Ccdc151
Ccdc18
Ccnb1ip1
Ccng2
Ccnh
Ccni
Ccnk
Cct4
Cd164
Cd2bp2
Cd81
Cdc123
Cdc20
Cdc34
Cdh10
Cdh20
Cdk12
Cdk13
Cdk17
Cdk19os
Cdk20
Cdk5
Cdk8
Cdkn1b
Cdkn2aip
Cdkn2d
Cdt1
Cenpo
Cenps
Cep120
Cep57
Cep85
Cfap20
Cggbp1
Chordc1
Chpf
Cic
Cipc
Cited2
Clasp1
Clcn6
Clip2
Cltc
Cnga4
Cnksr3
Cnot3
Commd3
Copz1
Coq10a
Cox18
Cpe
Cpt1a
Crebl2
Crebrf
Crem
Csmd2
Ctnnb1
Cul4a
Cycs
Cyfip2
Cyp51
D2Ertd93e
D530037H12Rik
D630022N01Rik
D730044K07Rik
D730045B01Rik
Daglb
Dclre1a
Ddost
Ddx20
Ddx23
Ddx39b
Ddx50
Desi2
Dhx35
Dis3
Disp3
Dll1
Dnajb12
Dnajb5
Dnajc1
Dnajc3
Dnpep
Dpy19l4
Dscam
Dusp6
Eci2
Edem3
Edf1
Eed
Egr1
Eif1ad
Eif3b
Eif4a1
Eif4a2
Eif4g2
Eif5a
Ell
Elp5
Epc1
Epn1
Ermard
Esrra
Etohd2
Etv4
Etv5
Etv6
Exd2
Fads1
Fam118a
Fam193a
Fam228b
Fam76a
Fastkd1
Fat1
Fat4
Fbxl19
Fbxl22
Fchsd2
Fgfr1op
Fign
Fiz1
Fos
Foxo3
Fra10ac1
Fto
Fubp3
Fxr2
Fyco1
G3bp1
Galk2
Ganab
Gapvd1
Gar1
Gas1
Gdap1l1
Gdpd1
Gfpt1
Gga1
Gipc1
Glo1
Glrx5
Gm10199
Gm10433
Gm10658
Gm13275
Gm13276
Gm13277
Gm15477
Gm15559
Gm15688
Gm26588
Gm26596
Gm2a
Gm3005
Gm30698
Gm3667
Gm3764
Gm38550
Gm4123
Gm4419
Gm4890
Gm5113
Gm5785
Gm6410
Gm8098
Gm9861
Gmfg
Gna11
Gnb2
Gorasp2
Got1
Gpbp1
Gpn3
Gpr108
Gpr180
Grcc10
Gria2
Grk4
Grk5
Gssos1
Gtf2a1
Gtf2i
Gtse1
Gzf1
H2ac13
H2ac21
H2ac8
H2bc11
H2bc15
H3c3
H3c6
H3f3a
H4c8
H4f16
Habp4
Harbi1
Hbp1
Hdgf
Hepacam
Herc2
Hexim1
Hexim2
Hint2
Hist1h4n
Hivep1
Hmg20a
Hmgb1
Hmgcr
Hnrnpa3
Hnrnpk
Hnrnpul1
Hnrnpul2
Hsd17b12
Hspa13
Hspa8
Hsph1
Iffo2
Ift80
Ilf3
Ing1
Insig1
Ints3
Ints9
Irf2bpl
Irgq
Irs1
Itgb1
Jkamp
Jund
Katnal1
Katnb1
Kbtbd3
Kcnn2
Kctd15
Kctd7
Kdm3a
Kdm4a
Khsrp
Kifc3
Klhdc2
Klhl28
Kmt2a
Kpna3
Kptn
Lamtor1
Lats2
Leng8
Lins1
Lix1l
Lmbrd1
Lmo3
LOC105246531
LOC114841036
LOC115488529
Lpxn
Lrba
Lrch4
Lrfn2
Lrp12
Lrrc27
Lrrc4c
Lrrn2
Lsamp
Lsm7
Luc7l
Luc7l2
Luc7l3
Mafb
Magi1
Malat1
Maml2
Maml3
Map3k12
Mapk7
Mapre2
Mastl
Maz
Mbd3
Mboat4
Mboat7
Mdga2
Med12l
Med13
Med25
Men1
Mettl25
Mettl26
Mex3b
Mfsd2a
Mfsd8
Mib1
Mical3
Mir22hg
Mknk2
Mlec
Mnt
Morn1
Mpc2
Mpzl2
Mrpl39
Mrpl41
Mrps16
Mrps18b
Mterf1a
Mterf3
Mtf2
Mtmr4
Mtmr6
Mus81
Mxi1
Mydgf
Myh10
Nabp2
Nacc2
Nadk2
Napa
Napg
Nav1
Nbeal2
Ncl
Ncoa5
Ndc80
Ndufab1
Ndufs8
Ndufv2
Neat1
Nelfa
Neurl4
Nfatc2
Nktr
Nlk
Nmbr
Nmt2
Noc2l
Notch1
Nphp3
Nr1d1
Nr3c1
Nrg2
Nsfl1c
Ntrk3
Nufip2
Nup107
Nup214
Oard1
Oaz1
Opa3
Otud6b
P4ha1
P4hb
Pa2g4
Pabpc1
Pafah1b3
Pank2
Parp6
Patz1
Pcbp2
Pcdh17
Pcdh7
Pcdh9
Pcgf2
Pcmtd1
Pcnx3
Pcyox1l
Pde10a
Pdhb
Pdzd7
Peli1
Pfn2
Pgp
Phf12
Phf23
Phf7
Phykpl
Picalm
Pidd1
Pim3
Pin1
Pip5k1a
Pisd-ps1
Plekhg2
Plxdc1
Pmel
Pnkd
Pnrc2
Poc5
Poldip3
Polg
Polr2b
Por
Ppm1b
Ppp1r12a
Ppp1r14c
Ppp2r1a
Ppp3ca
Prcc
Prdx2
Prpf19
Psmd7
Pten
Ptpa
R3hdm1
Rab10
Rab18
Rab40c
Rab4b
Rack1
Rad1
Rad51ap1
Ralb
Ralbp1
Ranbp10
Ranbp2
Rangap1
Rap1gap
Rap2a
Rassf2
Rbfox2
Rbm39
Rbm5
Rbm6
Rc3h2
Rcn2
Repin1
Rfx4
Rgma
Rheb
Rhobtb2
Ric8b
Rin2
Riok1
Rmnd5a
Rnf103
Rnf114
Rnf126
Rnf151
Rnf181
Rnf20
Rnf40
Rnf44
Rnu3b4
Rock1
Rpgrip1
Rpl10a
Rpl13a
Rpl24
Rpl27
Rpl29
Rpl32
Rpl37
Rprd2
Rps19
Rps26
Rps6ka5
Rptor
Rsbn1
Rtn4
Rwdd1
Rwdd2a
S1pr1
Sars2
Sart3
Sash1
Scaf1
Scaf8
Scamp5
Scd2
Scrib
Scyl1
Sdccag8
Selenof
Selenot
Sem1
Senp3
Septin2
Septin9
Sertad3
Sesn1
Sesn3
Setd5
Setdb1
Sez6l
Sf1
Sf3a2
Sf3b2
Sfr1
Sft2d3
Sgta
Sh3bp5
Shisa4
Sirt2
Ska2
Slc1a4
Slc22a5
Slc25a25
Slc25a38
Slc25a39
Slc25a42
Slc25a47
Slc26a6
Slc35b1
Slc35c2
Slc38a9
Slitrk5
Slx4ip
Smad7
Smarca2
Smdt1
Smim12
Smim14
Snd1
Snhg5
Snrnp70
Snx17
Sorbs1
Sox11
Sp1
Spag7
Spink10
Spred1
Spred2
Sptlc2
Srf
Srgap2
Srrm2
Srsf10
Ss18l2
Stag1
Stat2
Stip1
Stk11
Stox2
Strn3
Sult2b1
Taok2
Tatdn2
Tax1bp3
Tbc1d10b
Tbc1d23
Tbc1d31
Tbcb
Tbccd1
Tcea1
Tceanc2
Tcf4
Tcta
Tecr
Tedc2
Tesk2
Tet1
Tial1
Tigd5
Timm13
Tle3
Tle4
Tm7sf3
Tma16
Tmco3
Tmed4
Tmem126a
Tmem139
Tmem168
Tmem198b
Tmem256
Tmem39b
Tmem43
Tmem87b
Tnik
Tnks2
Tnrc18
Tnrc6b
Tns3
Tpm1
Tpp2
Tppp2
Traf4
Trib2
Trim9
Trip12
Trmt1l
Trmt2a
Trp53
Tsc22d4
Tspyl4
Tssc4
Ttc14
Ttc23
Ttc41
Ttc5
Tuba1a
Tubal3
Txn1
Txn2
Txndc11
Txndc9
Ubap2
Ube2j2
Ube2ql1
Ubqln4
Ubtf
Ufm1
Ugdh
Ugt8a
Uqcc2
Usp2
Usp22
Utp14b
Uvssa
Vamp3
Vcpip1
Vps26c
Vps37b
Wbp4
Wdfy3
Wdpcp
Wdr45b
Wdr62
Wfs1
Wtap
Xpot
Ywhag
Zbtb18
Zbtb20
Zbtb7a
Zbtb8os
Zc3h10
Zcchc14
Zcchc17
Zcchc9
Zcwpw1
Zdhhc14
Zdhhc17
Zfp113
Zfp157
Zfp235
Zfp24
Zfp248
Zfp386
Zfp41
Zfp428
Zfp46
Zfp473
Zfp503
Zfp521
Zfp574
Zfp608
Zfp687
Zfp786
Zfp788
Zfp821
Zfp866
Zfp869
Zfpm2
Zkscan17
Znhit6
Zswim4
Zswim9
Zxdc

## Sheet: Table3_markers_OLglia_clusters
Markers of different clusters shown in figure S2 comprising neural progenitors and oligodendroglial cells
NSC	NPC	cycOPC	OPC	iOL1	iOL2	MFOL	MOL1	MOL2
Vim	Sox11	Mki67	Cspg4	Gpr17	Gpr17	Slc9a3r2	Mgst3	Neat1
Hes1	Sox4	Top2a	Pdgfra	Nkx2-2	Itpr2	Igsf8	Pmp22	Grm3
Id1	Dcx	Pcna	Ascl1	Itpr2	Bcas1	Cnp	Cnp	Il33
		Ascl1	Olig2	Bcas1	Tns3	Mag	Mag	Cnp
		Cspg4	Olig1	Tns3	Olig2	Mbp	Mbp	Mag
		Pdgfra	Sox10	Olig2	Olig1	Plp1	Plp1	Mbp
		Olig2		Olig1	Sox10	Mog	Mog	Plp1
		Olig1		Sox10		Olig1	Olig1	Mog
		Sox10				Sox10	Sox10	Olig1
						Olig2	Olig2	Sox10
								Olig2
	Bold	Cluster/Cell stage specific marker
	Plain	More shared mark in oligodendroglia
	NSC	Neural Stem Cell
	NPC	Neural Progenitor Cell
	cycOPC	cycling OPC
	OPC	Oligodendrocyte Precursor Cell
	iOL1	Immature Oligodendrocyte 1
	iOL2	Immature Oligodendrocyte 2
	MFOL	Myelin Forming Oligodendrocyte
	MOL1	Myelinating Oligodendrocyte 1
	MOL2	Myelinating Oligodendrocyte 2

## Sheet: Table4_GOs_downreg_p005
Gene Ontology Biological Processes enriched in downregulated genes in Tns3iKO OPCs/iOLs compared to controls
ID	Description	GeneRatio	BgRatio	pvalue	p.adjust	qvalue	geneID	Count
GO:0051961	negative regulation of nervous system development	41/770	362/23210	7.83763e-12	3.06292e-08	2.55472e-08	Cpe/Sox10/Sirt2/Sox8/Map4k4/Sema5a/Kank1/Gdi1/Fgfr3/Inppl1/Sema5b/Nkx2.2/Apbb1/Brinp1/Rgma/Daam2/Lrp4/Plxna3/Zfp365/Id2/Rufy3/Mt3/Sorl1/Bmerb1/Id3/Ntm/Cyth2/Bmp4/Hes5/Id4/Dixdc1/Cdk5/Lpar1/Cend1/Thy1/Gorasp1/Gdf11/Gli3/Slit1/Inpp5j/Ascl2	41
GO:0050768	negative regulation of neurogenesis	39/770	337/23210	1.31937e-11	3.06292e-08	2.55472e-08	Sox10/Sirt2/Sox8/Map4k4/Sema5a/Kank1/Gdi1/Fgfr3/Inppl1/Sema5b/Nkx2.2/Apbb1/Brinp1/Rgma/Daam2/Lrp4/Plxna3/Zfp365/Id2/Rufy3/Mt3/Sorl1/Bmerb1/Id3/Ntm/Cyth2/Bmp4/Hes5/Id4/Dixdc1/Cdk5/Lpar1/Thy1/Gorasp1/Gdf11/Gli3/Slit1/Inpp5j/Ascl2	39
GO:0010721	negative regulation of cell development	40/770	387/23210	2.33861e-10	3.61939e-07	3.01886e-07	Sox10/Sirt2/Sox8/Map4k4/Sema5a/Kank1/Gdi1/Fgfr3/Inppl1/Sema5b/Nkx2.2/Apbb1/Brinp1/Rgma/Daam2/Lrp4/Plxna3/Zfp365/Id2/Rufy3/Mt3/Sorl1/Bmerb1/Id3/Ntm/Cyth2/Npr2/Bmp4/Hes5/Id4/Dixdc1/Cdk5/Lpar1/Thy1/Gorasp1/Gdf11/Gli3/Slit1/Inpp5j/Ascl2	40
GO:0048709	oligodendrocyte differentiation	19/770	103/23210	1.13243e-09	1.31447e-06	1.09638e-06	Ntrk2/Sox10/Sirt2/Clu/Sox8/Wdr1/Fgfr3/Nkx2.2/Daam2/Zfp365/Mtor/Id2/Bmp4/Hes5/Id4/Cdk5/Hdac11/Gli3/Mir219a-2	19
GO:0045665	negative regulation of neuron differentiation	29/770	260/23210	1.30007e-08	1.20724e-05	1.00693e-05	Sox8/Map4k4/Sema5a/Kank1/Gdi1/Inppl1/Sema5b/Nkx2.2/Apbb1/Rgma/Lrp4/Plxna3/Zfp365/Id2/Rufy3/Id3/Ntm/Cyth2/Hes5/Id4/Dixdc1/Cdk5/Lpar1/Thy1/Gorasp1/Gdf11/Gli3/Slit1/Inpp5j	29
GO:0010001	glial cell differentiation	27/770	239/23210	3.14069e-08	2.43037e-05	2.02713e-05	Ntrk2/Sox10/Sirt2/Clu/Sox8/Wdr1/Fgfr3/Ptpn11/Nkx2.2/Daam2/Zfp365/Mtor/Id2/Mt3/Bmp4/Hes5/Agt/Id4/Cdk5/Bag1/Hdac11/Klf15/Lgi4/Pick1/Gli3/Mir219a-2/Ncmap	27
GO:0010769	regulation of cell morphogenesis involved in differentiation	32/770	343/23210	1.63408e-07	0.000108386	9.04025e-05	Ntrk2/Sema5a/Kank1/Plxnb1/Gdi1/Map1b/Mgll/Sema5b/Rnd2/Rgma/Lrp4/Lims2/Plxna3/Mfn1/Rufy3/Cul7/Cux2/Carmil1/Brsk1/Fbxo31/Dixdc1/Cdk5/L1cam/Ss18l2/Thy1/Gorasp1/Parp6/Pdpn/Rac3/Slit1/Ngf/Chrna3	32
GO:0006836	neurotransmitter transport	29/770	298/23210	2.55657e-07	0.000142813	0.000119117	Slc1a2/Atp1a2/Ntrk2/Gabbr1/Trim9/Abat/Pfn2/Grik5/Vamp2/Myo6/Asic1/Gipc1/Slc25a18/Pnkd/Syn2/Brsk1/Sept5/Stx2/Rab3a/Slc6a15/Slc5a7/Ddc/Stx1a/Adra1a/Ngf/Grm8/Cplx3/Nppa/Chrna3	29
GO:0045666	positive regulation of neuron differentiation	38/770	461/23210	2.8877e-07	0.000142813	0.000119117	Ntrk2/Fyn/Sema5a/Mmd2/Plxnb1/Gdi1/Map1b/Rnd2/Acsl6/Cacng7/Nkx2.2/Apbb1/Brinp1/Rgma/Plxna3/Mtor/Mfn1/Rufy3/Cul7/Cux2/Sh3gl3/Bmp4/Agt/Fbxo31/Dixdc1/Lpar1/L1cam/Ss18l2/Tenm3/Bcl6/Ddx56/Parp6/Rgs6/Syt3/Pcp4/Cpne6/Adra2c/Ngf	38
GO:0006091	generation of precursor metabolites and energy	34/770	389/23210	3.1721e-07	0.000142813	0.000119117	Aldoc/Acox1/Pygb/Taldo1/Pfkm/S100b/Mtor/Slc25a18/Irs2/Ddit4/Mt3/Pgm2/Ndufa7/Gpd1/Ogdhl/Jmjd8/Ndufv3/Ndufb9/Gys1/Ppargc1a/Ppp1r3c/Cisd1/Slc37a4/Coq10a/Phkg1/Pygm/Ppp1r1a/Chchd10/Dnajc15/Slc25a33/Ppp1r3g/Tefm/Fbp1/Aass	34
GO:0001505	regulation of neurotransmitter levels	33/770	373/23210	3.58377e-07	0.000142813	0.000119117	Slc1a2/Atp1a2/Ntrk2/Clu/Trim9/Abat/Pfn2/Grik5/Vamp2/Myo6/Dynll1/Asic1/Mtor/Gipc1/Aldh6a1/Pnkd/Syn2/Brsk1/Sept5/Agt/Stx2/Rab3a/Amt/Cyp2d22/Slc5a7/Ddc/Stx1a/Adra1a/Chdh/Ngf/Grm8/Cplx3/Chrna3	33
GO:0031345	negative regulation of cell projection organization	23/770	205/23210	3.69105e-07	0.000142813	0.000119117	Fyn/Map4k4/Sema5a/Kank1/Gdi1/Pfn2/Inppl1/Sema5b/Rgma/Lrp4/Plxna3/Zfp365/Rufy3/Ntm/Cyth2/Cdk5/Lpar1/Thy1/Gorasp1/Arhgap24/Slit1/Inpp5j/Mak	23
GO:0042063	gliogenesis	30/770	323/23210	4.35969e-07	0.000155708	0.000129873	Ntrk2/Sox10/Sirt2/Vcan/Clu/Sox8/Wdr1/Fgfr3/Ptpn11/Nkx2.2/Daam2/Zfp365/Mtor/Id2/Mt3/Bmerb1/Bmp4/Hes5/Agt/Id4/Cdk5/Bag1/Hdac11/Klf15/Lgi4/Pick1/Gli3/Mir219a-2/Ncmap/Ascl2	30
GO:0021782	glial cell development	16/770	111/23210	7.97276e-07	0.000264411	0.00022054	Ntrk2/Sox10/Sirt2/Clu/Fgfr3/Nkx2-2/Id2/Mt3/Hes5/Agt/Id4/Cdk5/Hdac11/Lgi4/Pick1/Ncmap	16
GO:0048713	regulation of oligodendrocyte differentiation	11/770	52/23210	8.70557e-07	0.000269466	0.000224756	Sirt2/Wdr1/Nkx2-2/Daam2/Zfp365/Mtor/Id2/Bmp4/Hes5/Id4/Mir219a-2	11
GO:0031346	positive regulation of cell projection organization	37/770	466/23210	1.02313e-06	0.0002969	0.000247638	Ntrk2/Fyn/Sema5a/Plxnb1/Gdi1/Map1b/Rnd2/Acsl6/Cacng7/Prkcq/Apbb1/Rgma/Dynll1/Plxna3/Mtor/Mfn1/Rufy3/Cul7/Kat2a/Cux2/Carmil1/Bmp4/Agt/Fbxo31/Dixdc1/Lpar1/L1cam/Ss18l2/Tenm3/Bcas3/Ddx56/Parp6/Fuz/Syt3/Pcp4/Cpne6/Ngf	37
GO:0006112	energy reserve metabolic process	14/770	88/23210	1.15138e-06	0.000308754	0.000257525	Pygb/Pfkm/S100b/Mtor/Irs2/Mt3/Pgm2/Gys1/Ppp1r3c/Slc37a4/Phkg1/Pygm/Ppp1r1a/Ppp1r3g	14
GO:0006631	fatty acid metabolic process	32/770	376/23210	1.25601e-06	0.000308754	0.000257525	Scd2/Fads2/Fads1/Acox1/Gpam/Tecr/Acsbg1/Mgll/Acsl6/Fabp5/Mtor/Slc27a4/Irs2/Pdk2/Acaa1a/Abhd16a/Acss2/Agt/Acot11/Pla2g3/Ppargc1a/Acsf2/Pex7/Pdpn/Cyp2d22/Ptges2/Echdc2/Prxl2b/Decr2/Cyp4f14/Pnpla3/Acat3	32
GO:0050808	synapse organization	36/770	451/23210	1.26348e-06	0.000308754	0.000257525	Sparcl1/Bcan/Tuba1a/Ntrk2/Ncan/Fyn/Ndrg2/Plxnb1/Lrrn1/C1ql1/Pfn2/Nrcam/Myo6/Apbb1/Lrp4/Wasf1/Zfp365/Mfn1/Cux2/Tnc/Epha5/Lhfpl4/Cdk5/L1cam/Drp2/Rab3a/Pin1/Cript/Pcdh8/Pick1/Chchd10/Pdzrn3/Ntng2/Nptx1/Dok7/Cntn5	36
GO:0010976	positive regulation of neuron projection development	31/770	362/23210	1.61239e-06	0.000374317	0.00031221	Ntrk2/Fyn/Sema5a/Plxnb1/Gdi1/Map1b/Rnd2/Acsl6/Cacng7/Apbb1/Rgma/Plxna3/Mtor/Mfn1/Rufy3/Cul7/Cux2/Bmp4/Agt/Fbxo31/Dixdc1/Lpar1/L1cam/Ss18l2/Tenm3/Ddx56/Parp6/Syt3/Pcp4/Cpne6/Ngf	31
GO:0006644	phospholipid metabolic process	30/770	348/23210	2.06673e-06	0.000456945	0.000381128	Agpat3/Serinc5/Fgfr3/Gpam/Inppl1/Prdx6/Acsl6/Pik3r2/Fabp5/Ptdss1/Gde1/Plppr2/Ip6k2/Pld2/Abhd16a/Smpd2/Pik3ip1/Mvk/Pla2g3/Pisd/Lcat/Acp6/Ptpmt1/Tmem150a/Mboat1/Inpp5j/Plppr3/Pnpla3/Pigz/Aspg	30
GO:0007264	small GTPase mediated signal transduction	37/770	485/23210	2.62235e-06	0.000553435	0.000461609	Gpr17/Map4k4/Adcyap1r1/Kank1/Dock9/Mmd2/Gdi1/Abr/Cdc42se2/Rnd2/Mras/Ralgds/Wasf1/Arhgef10l/Rtkn/Arhgef4/Cyth2/Rapgef3/Arhgef25/Lpar1/Bcl6/Rab3a/Rapgefl1/Rab33a/Rab4a/Arhgap24/Pdpn/Rhou/Rac3/Rasgrp2/Gm266/Adra1a/Rab40b/Obscn/Fbp1/Rerg/Ngf	37
GO:0034764	positive regulation of transmembrane transport	23/770	233/23210	3.43745e-06	0.000693916	0.000578781	Slc1a2/Clip3/Ank2/Acsl6/Ptpn11/Ehd3/Irs2/Car2/Bmp4/Rapgef3/Agt/Wnk2/Repin1/Hspa2/Thy1/Klf15/Kcne1l/Chchd10/Slc26a6/Kcnj11/Npsr1/Nppa/Htr3a	23
GO:0010770	positive regulation of cell morphogenesis involved in differentiation	20/770	185/23210	3.73986e-06	0.000698597	0.000582685	Ntrk2/Sema5a/Plxnb1/Gdi1/Map1b/Rnd2/Lims2/Plxna3/Mfn1/Rufy3/Cul7/Cux2/Carmil1/Fbxo31/Dixdc1/L1cam/Ss18l2/Parp6/Rac3/Ngf	20
GO:0007005	mitochondrion organization	35/770	454/23210	3.86426e-06	0.000698597	0.000582685	Hip1r/Sqstm1/Parp1/Map1lc3b/Atcay/Vat1/Tomm20/Mfn1/Wipi2/Kat2a/Fbxo7/Miga1/Poldip2/Letm1/Atg9a/Dap3/Cdk5/Myh14/Wipi1/Dctn6/Miga2/Ndufb9/Mpv17/Jtb/Rab3a/Ppargc1a/Cox14/Aars2/Cox19/Fam162a/Atpaf1/Chchd10/Dnajc15/Slc25a33/Nptx1	35
GO:0007269	neurotransmitter secretion	20/770	186/23210	4.06248e-06	0.000698597	0.000582685	Ntrk2/Trim9/Pfn2/Grik5/Vamp2/Myo6/Asic1/Gipc1/Pnkd/Syn2/Brsk1/Sept5/Stx2/Rab3a/Stx1a/Adra1a/Ngf/Grm8/Cplx3/Chrna3	20
GO:0099643	signal release from synapse	20/770	186/23210	4.06248e-06	0.000698597	0.000582685	Ntrk2/Trim9/Pfn2/Grik5/Vamp2/Myo6/Asic1/Gipc1/Pnkd/Syn2/Brsk1/Sept5/Stx2/Rab3a/Stx1a/Adra1a/Ngf/Grm8/Cplx3/Chrna3	20
GO:0015980	energy derivation by oxidation of organic compounds	24/770	255/23210	4.86181e-06	0.000806192	0.000672428	Pygb/Pfkm/S100b/Mtor/Slc25a18/Irs2/Mt3/Pgm2/Ndufa7/Gpd1/Ogdhl/Ndufv3/Ndufb9/Gys1/Ppargc1a/Ppp1r3c/Cisd1/Slc37a4/Coq10a/Phkg1/Pygm/Ppp1r1a/Dnajc15/Ppp1r3g	24
GO:0042552	myelination	18/770	159/23210	5.93001e-06	0.000944853	0.000788083	Mbp/Ntrk2/Sox10/Sirt2/Fyn/Clu/Bcas1/Pllp/Serinc5/Fgfr3/S100b/Mtor/Gal3st1/Hes5/Id4/Lgi4/Mir219a-2/Ncmap	18
GO:0010977	negative regulation of neuron projection development	19/770	175/23210	6.10502e-06	0.000944853	0.000788083	Map4k4/Sema5a/Kank1/Gdi1/Inppl1/Sema5b/Rgma/Lrp4/Plxna3/Zfp365/Rufy3/Ntm/Cyth2/Cdk5/Lpar1/Thy1/Gorasp1/Slit1/Inpp5j	19
GO:0048588	developmental cell growth	24/770	260/23210	6.77891e-06	0.00101531	0.000846846	Bcan/Sema5a/Cyfip2/Gdi1/Map1b/Dclk1/Mgll/Sema5b/Rnd2/Cacng7/Rgma/Wasf1/Plxna3/Mtor/Rufy3/Agt/Cdk5/L1cam/Pin1/Slit1/Syt3/Adra1a/Cpne6/Ngf	24
GO:0007272	ensheathment of neurons	18/770	162/23210	7.7142e-06	0.00102573	0.00085554	Mbp/Ntrk2/Sox10/Sirt2/Fyn/Clu/Bcas1/Pllp/Serinc5/Fgfr3/S100b/Mtor/Gal3st1/Hes5/Id4/Lgi4/Mir219a-2/Ncmap	18
GO:0008366	axon ensheathment	18/770	162/23210	7.7142e-06	0.00102573	0.00085554	Mbp/Ntrk2/Sox10/Sirt2/Fyn/Clu/Bcas1/Pllp/Serinc5/Fgfr3/S100b/Mtor/Gal3st1/Hes5/Id4/Lgi4/Mir219a-2/Ncmap	18
GO:0048715	negative regulation of oligodendrocyte differentiation	6/770	16/23210	7.87439e-06	0.00102573	0.00085554	Sirt2/Daam2/Id2/Bmp4/Hes5/Id4	6
GO:0014014	negative regulation of gliogenesis	10/770	53/23210	8.16088e-06	0.00102573	0.00085554	Sox10/Sirt2/Fgfr3/Daam2/Id2/Bmerb1/Bmp4/Hes5/Id4/Ascl2	10
GO:0032970	regulation of actin filament-based process	31/770	393/23210	8.67976e-06	0.00102573	0.00085554	Atp1a2/Sema5a/Kank1/Wdr1/Ank2/Hip1r/Pfn2/Rnd2/Fam107a/Prkcq/Pik3r2/Wasf1/Mtor/Rgcc/Arpc1a/Arhgef10l/Carmil1/Rapgef3/Epha5/Dixdc1/Lpar1/Bcas3/Pdpn/Rhou/Rac3/Pick1/Wnt4/Fzd10/Phpt1/Tac1/Mylk3	31
GO:0044264	cellular polysaccharide metabolic process	14/770	104/23210	8.7268e-06	0.00102573	0.00085554	Pygb/Pfkm/Mtor/Irs2/Pgm2/Gys1/Csgalnact1/Ppp1r3c/Slc37a4/Phkg1/B3gnt7/Pygm/Ppp1r1a/Ppp1r3g	14
GO:0042326	negative regulation of phosphorylation	34/770	452/23210	8.94954e-06	0.00102573	0.00085554	Sirt2/Ndrg2/Inppl1/Ptprt/Mapk8ip1/Pik3r2/Dynll1/Mtor/Irs2/Ddit4/Sorl1/Fbxo7/Ezr/Bmp4/Akt1s1/Wnk2/Bag1/Dusp26/Il18/Pik3ip1/Cdkn1c/Prkar1b/Thy1/Ppargc1a/Dbndd2/Pin1/Dnajc15/Dusp9/Inpp5j/Drd5/Kirrel2/Pcp4/Fbp1/Vps25	34
GO:0045685	regulation of glial cell differentiation	13/770	91/23210	9.41298e-06	0.00102573	0.00085554	Sirt2/Wdr1/Fgfr3/Nkx2-2/Daam2/Zfp365/Mtor/Id2/Bmp4/Hes5/Id4/Bag1/Mir219a-2	13
GO:0005977	glycogen metabolic process	12/770	78/23210	9.51186e-06	0.00102573	0.00085554	Pygb/Pfkm/Mtor/Irs2/Pgm2/Gys1/Ppp1r3c/Slc37a4/Phkg1/Pygm/Ppp1r1a/Ppp1r3g	12
GO:0006073	cellular glucan metabolic process	12/770	78/23210	9.51186e-06	0.00102573	0.00085554	Pygb/Pfkm/Mtor/Irs2/Pgm2/Gys1/Ppp1r3c/Slc37a4/Phkg1/Pygm/Ppp1r1a/Ppp1r3g	12
GO:0044042	glucan metabolic process	12/770	78/23210	9.51186e-06	0.00102573	0.00085554	Pygb/Pfkm/Mtor/Irs2/Pgm2/Gys1/Ppp1r3c/Slc37a4/Phkg1/Pygm/Ppp1r1a/Ppp1r3g	12
GO:0046879	hormone secretion	29/770	357/23210	9.65188e-06	0.00102573	0.00085554	Cpe/Gja1/Map4k4/Gabbr1/Abat/Vamp2/Ptpn11/Pfkm/Dynll1/Dio2/Scg5/Irs2/Adcy5/Pim3/Kdm5b/Agt/Hmgn3/Epha5/Mpc2/Selenom/Arntl/Pde1c/Stx1a/Ptpmt1/Kcnj11/Phpt1/Tac1/Cplx3/Nppa	29
GO:0051496	positive regulation of stress fiber assembly	10/770	54/23210	9.72046e-06	0.00102573	0.00085554	Pfn2/Prkcq/Mtor/Rgcc/Arhgef10l/Carmil1/Rapgef3/Lpar1/Wnt4/Tac1	10
GO:0014013	regulation of gliogenesis	17/770	150/23210	1.0532e-05	0.00108667	0.000906368	Sox10/Sirt2/Sox8/Wdr1/Fgfr3/Nkx2-2/Daam2/Zfp365/Mtor/Id2/Bmerb1/Bmp4/Hes5/Id4/Bag1/Mir219a-2/Ascl2	17
GO:0099003	vesicle-mediated transport in synapse	23/770	250/23210	1.10685e-05	0.0011172	0.000931831	Sirt2/Trim9/Pfn2/Grik5/Vamp2/Myo6/Gipc1/Syn2/Brsk1/Sh3gl3/Sept5/Cdk5/Stx2/Prkar1b/Rab3a/Ston2/Ddc/Pick1/Stx1a/Adra1a/Grm8/Cplx3/Chrna3	23
GO:0007015	actin filament organization	31/770	400/23210	1.23171e-05	0.00120059	0.00100139	Sema5a/Kank1/Wdr1/Hip1r/Pfn2/Inppl1/Rnd2/Efs/Fam107a/Prkcq/Pik3r2/Wasf1/Mtor/Rgcc/Arpc1a/Rufy3/Arhgef10l/Carmil1/Ezr/Rapgef3/Lpar1/Rhou/Gdpd2/Mical2/Rac3/Pick1/Shroom1/Wnt4/Tac1/Pakap/Myom3	31
GO:0009914	hormone transport	29/770	362/23210	1.25628e-05	0.00120059	0.00100139	Cpe/Gja1/Map4k4/Gabbr1/Abat/Vamp2/Ptpn11/Pfkm/Dynll1/Dio2/Scg5/Irs2/Adcy5/Pim3/Kdm5b/Agt/Hmgn3/Epha5/Mpc2/Selenom/Arntl/Pde1c/Stx1a/Ptpmt1/Kcnj11/Phpt1/Tac1/Cplx3/Nppa	29
GO:0060560	developmental growth involved in morphogenesis	24/770	270/23210	1.28061e-05	0.00120059	0.00100139	Bcan/Sema5a/Cyfip2/Gdi1/Map1b/Dclk1/Mgll/Sema5b/Rnd2/Cacng7/Rgma/Wasf1/Plxna3/Rufy3/Bmp4/Kdm5b/Tnc/Cdk5/L1cam/Fgf1/Slit1/Syt3/Cpne6/Ngf	24
GO:0051495	positive regulation of cytoskeleton organization	21/770	218/23210	1.31717e-05	0.00120059	0.00100139	Sema5a/Wdr1/Hip1r/Map1b/Pfn2/Prkcq/Wasf1/Plxna3/Mtor/Rgcc/Arpc1a/Arhgef10l/Carmil1/Rapgef3/Lpar1/Bcas3/Rac3/Pick1/Wnt4/Tac1/Mylk3	21
GO:0032956	regulation of actin cytoskeleton organization	28/770	344/23210	1.31877e-05	0.00120059	0.00100139	Sema5a/Kank1/Wdr1/Hip1r/Pfn2/Rnd2/Fam107a/Prkcq/Pik3r2/Wasf1/Mtor/Rgcc/Arpc1a/Arhgef10l/Carmil1/Rapgef3/Epha5/Dixdc1/Lpar1/Bcas3/Rhou/Rac3/Pick1/Wnt4/Fzd10/Phpt1/Tac1/Mylk3	28
GO:0099504	synaptic vesicle cycle	21/770	221/23210	1.62159e-05	0.00144789	0.00120766	Trim9/Pfn2/Grik5/Vamp2/Myo6/Gipc1/Syn2/Brsk1/Sh3gl3/Sept5/Cdk5/Stx2/Prkar1b/Rab3a/Ston2/Ddc/Stx1a/Adra1a/Grm8/Cplx3/Chrna3	21
GO:1902903	regulation of supramolecular fiber organization	28/770	349/23210	1.71801e-05	0.00150504	0.00125532	Clu/Sema5a/Kank1/Wdr1/Clip3/Map1a/Hip1r/Map1b/Pfn2/Camsap2/Prkcq/Pik3r2/Wasf1/Mtor/Rgcc/Arpc1a/Arhgef10l/Bmerb1/Slc39a12/Carmil1/Rapgef3/Lpar1/Rac3/Pick1/Wnt4/Inpp5j/Tac1/Mylk3	28
GO:0001558	regulation of cell growth	32/770	431/23210	2.11379e-05	0.00181747	0.00151591	Gja1/Sema5a/Sh3bp4/Gdi1/Map1b/Mgll/Sema5b/Rnd2/Cacng7/Fam107a/Apbb1/Rgma/Plxna3/Mtor/Rufy3/Ip6k2/Agt/Cdk5/L1cam/Bcl6/Gng4/Pin1/Creb3/Hbegf/Slit1/Slc25a33/Syt3/Fbp1/Cpne6/Rerg/Ngf/Nppa	32
GO:0014003	oligodendrocyte development	8/770	37/23210	2.32604e-05	0.0019636	0.0016378	Sox10/Clu/Fgfr3/Nkx2-2/Id2/Hes5/Id4/Hdac11	8
GO:0007265	Ras protein signal transduction	31/770	414/23210	2.40634e-05	0.00199511	0.00166408	Gpr17/Map4k4/Kank1/Mmd2/Abr/Cdc42se2/Rnd2/Mras/Wasf1/Arhgef10l/Rtkn/Arhgef4/Cyth2/Rapgef3/Arhgef25/Lpar1/Bcl6/Rab3a/Rab33a/Rab4a/Arhgap24/Pdpn/Rhou/Rac3/Gm266/Adra1a/Rab40b/Obscn/Fbp1/Rerg/Ngf	31
GO:0032535	regulation of cellular component size	30/770	397/23210	2.73192e-05	0.00221183	0.00184485	Aqp4/Sema5a/Kank1/Wdr1/Gdi1/Hip1r/Map1b/Pfn2/Mgll/Sema5b/Rnd2/Pik3r2/Rgma/Wasf1/Plxna3/Mtor/Arpc1a/Rufy3/Carmil1/Ezr/Rapgef3/Akt1s1/Cdk5/L1cam/Rac3/Pick1/Slit1/Pex11a/Sctr/Ngf	30
GO:0005976	polysaccharide metabolic process	14/770	115/23210	2.79286e-05	0.00221183	0.00184485	Pygb/Pfkm/Mtor/Irs2/Pgm2/Gys1/Csgalnact1/Ppp1r3c/Slc37a4/Phkg1/B3gnt7/Pygm/Ppp1r1a/Ppp1r3g	14
GO:0051588	regulation of neurotransmitter transport	18/770	178/23210	2.81065e-05	0.00221183	0.00184485	Ntrk2/Gabbr1/Abat/Pfn2/Grik5/Myo6/Asic1/Gipc1/Pnkd/Sept5/Rab3a/Stx1a/Adra1a/Ngf/Grm8/Cplx3/Nppa/Chrna3	18
GO:1902905	positive regulation of supramolecular fiber organization	19/770	195/23210	2.86248e-05	0.00221508	0.00184755	Sema5a/Wdr1/Hip1r/Map1b/Pfn2/Prkcq/Wasf1/Mtor/Rgcc/Arpc1a/Arhgef10l/Carmil1/Rapgef3/Lpar1/Rac3/Pick1/Wnt4/Tac1/Mylk3	19
GO:0016054	organic acid catabolic process	20/770	213/23210	3.04155e-05	0.00227773	0.00189981	Acox1/Abat/Mtor/Slc27a4/Irs2/Aldh6a1/Bcat1/Aldh1l1/Acaa1a/Abhd16a/Csad/Gstz1/Amt/Pex7/Prodh/Fah/Echdc2/Idnk/Acat3/Aass	20
GO:0046395	carboxylic acid catabolic process	20/770	213/23210	3.04155e-05	0.00227773	0.00189981	Acox1/Abat/Mtor/Slc27a4/Irs2/Aldh6a1/Bcat1/Aldh1l1/Acaa1a/Abhd16a/Csad/Gstz1/Amt/Pex7/Prodh/Fah/Echdc2/Idnk/Acat3/Aass	20
GO:0006520	cellular amino acid metabolic process	22/770	249/23210	3.18779e-05	0.00234935	0.00195955	Psat1/Abat/Atcay/Aldh6a1/Bcat1/Yars/Csad/Cbs/Mthfr/Plod2/Gstz1/Amt/Vars2/Asns/Cyp2d22/Ddc/Prodh/Aars2/Fah/Fars2/Aspg/Aass	22
GO:0046486	glycerolipid metabolic process	26/770	325/23210	3.56732e-05	0.00258798	0.00215858	Serinc5/Gpam/Inppl1/Mgll/Prdx6/Acsl6/Ptpn11/Pik3r2/Fabp5/Ptdss1/Sorl1/Ip6k2/Pld2/Abhd16a/Gpd1/Pla2g3/Pisd/Lcat/Acp6/Slc37a4/Ptpmt1/Tmem150a/Inpp5j/Slc22a4/Pnpla3/Pigz	26
GO:0046928	regulation of neurotransmitter secretion	15/770	133/23210	3.6412e-05	0.00260094	0.00216939	Ntrk2/Pfn2/Grik5/Myo6/Asic1/Gipc1/Pnkd/Sept5/Rab3a/Stx1a/Adra1a/Ngf/Grm8/Cplx3/Chrna3	15
GO:0032233	positive regulation of actin filament bundle assembly	10/770	64/23210	4.56411e-05	0.00320927	0.00267679	Pfn2/Prkcq/Mtor/Rgcc/Arhgef10l/Carmil1/Rapgef3/Lpar1/Wnt4/Tac1	10
GO:0044282	small molecule catabolic process	25/770	311/23210	4.63109e-05	0.00320927	0.00267679	Acox1/Abat/Pfkm/Mtor/Slc27a4/Irs2/Aldh6a1/Bcat1/Mt3/Pnkd/Aldh1l1/Pgm2/Acaa1a/Abhd16a/Csad/Gstz1/Amt/Pex7/Prodh/Fah/Echdc2/Idnk/Inpp5j/Acat3/Aass	25
GO:0007409	axonogenesis	33/770	470/23210	4.7942e-05	0.00327345	0.00273032	Ntrk2/Sema5a/Cyfip2/Plxnb1/Gdi1/Map1a/Fgfr3/Map1b/Dclk1/Nrcam/Mgll/Sema5b/Rnd2/Ptpn11/Apbb1/Rgma/Lrp4/Plxna3/Rufy3/Brsk1/Epha5/Dixdc1/Cdk5/L1cam/Thy1/Rab3a/Bmpr1b/Gli3/Slit1/Ntng2/Nptx1/Ngf/Cntn5	33
GO:1903305	regulation of regulated secretory pathway	18/770	186/23210	5.04183e-05	0.00339264	0.00282973	Trim9/Abr/Pfn2/Grik5/Vamp2/Myo6/Gipc1/Pld2/Sept5/Cdk5/Rab3a/Stx1a/Syt3/Adra1a/Grm8/Cplx3/Nppa/Chrna3	18
GO:0031032	actomyosin structure organization	19/770	204/23210	5.32476e-05	0.00353184	0.00294583	Wdr1/Pfn2/Epb41/Prkcq/Pik3r2/Csrp1/Epb41l1/Mtor/Rgcc/Arhgef10l/Rtkn/Carmil1/Rapgef3/Myh14/Lpar1/Wnt4/Tac1/Myom3/Mylk3	19
GO:0048011	neurotrophin TRK receptor signaling pathway	7/770	31/23210	5.64165e-05	0.00366949	0.00306065	Cyfip2/Ptpn11/Wasf1/Ddit4/Agt/Akt1s1/Ngf	7
GO:0050770	regulation of axonogenesis	19/770	205/23210	5.69036e-05	0.00366949	0.00306065	Ntrk2/Sema5a/Plxnb1/Gdi1/Map1b/Mgll/Sema5b/Rnd2/Rgma/Lrp4/Plxna3/Rufy3/Brsk1/Dixdc1/Cdk5/L1cam/Thy1/Slit1/Ngf	19
GO:0034765	regulation of ion transmembrane transport	33/770	478/23210	6.64382e-05	0.00422565	0.00352453	Atp1a2/Fyn/Gja1/Wdr1/Ahcyl1/Ank2/Acsl6/Vamp2/Cacng7/Ehd3/Kcna2/Mtor/Irs2/Bmp4/Rapgef3/1810037I17Rik/Agt/Shisa9/Wnk2/Kcnq2/Hspa2/Thy1/Ppargc1a/Kcne1l/Slc31a2/Chchd10/Kcnj3/Kcnj11/Npsr1/Ngf/Mettl21c/Nppa/Htr3a	33
GO:0050771	negative regulation of axonogenesis	10/770	67/23210	6.83318e-05	0.00428736	0.003576	Sema5a/Gdi1/Sema5b/Rgma/Lrp4/Plxna3/Rufy3/Cdk5/Thy1/Slit1	10
GO:0090407	organophosphate biosynthetic process	30/770	421/23210	8.01633e-05	0.00491942	0.00410319	Adcyap1r1/Agpat3/Serinc5/Gpam/Inppl1/Parp1/Acsl6/Fabp5/Ptdss1/Ak3/Adcy5/Ip6k2/Pld2/Pdk2/Npr2/Acss2/Adk/Mvk/Mpc2/Ppargc1a/Pisd/Lcat/Aprt/Flad1/Ptpmt1/Mboat1/Pnpla3/Pigz/Gucy2e/Nppa	30
GO:0042593	glucose homeostasis	22/770	265/23210	8.10563e-05	0.00491942	0.00410319	Aqp4/Map4k4/Sesn3/Ptpn11/Pfkm/Pik3r2/Dynll1/Fabp5/Smarcb1/Adcy5/Pim3/Pdk2/Hmgn3/Epha5/Mpc2/Klf15/Slc37a4/Pde1c/Ptpmt1/Ppp1r3g/Phpt1/Fcor	22
GO:1990138	neuron projection extension	18/770	193/23210	8.15843e-05	0.00491942	0.00410319	Bcan/Sema5a/Cyfip2/Gdi1/Map1b/Dclk1/Mgll/Sema5b/Cacng7/Wasf1/Plxna3/Rufy3/Cdk5/L1cam/Slit1/Syt3/Cpne6/Ngf	18
GO:0033500	carbohydrate homeostasis	22/770	266/23210	8.56681e-05	0.00509945	0.00425335	Aqp4/Map4k4/Sesn3/Ptpn11/Pfkm/Pik3r2/Dynll1/Fabp5/Smarcb1/Adcy5/Pim3/Pdk2/Hmgn3/Epha5/Mpc2/Klf15/Slc37a4/Pde1c/Ptpmt1/Ppp1r3g/Phpt1/Fcor	22
GO:0030900	forebrain development	28/770	386/23210	0.000101461	0.00596307	0.00497368	Slc1a2/Bcan/Ntrk2/Kif1a/Fyn/Sema5a/Mfsd2a/Fgfr3/Dclk1/Plxna3/Id2/Atat1/Kat2a/Bmerb1/Bmp4/Hes5/Id4/Epha5/Dixdc1/Cdk5/Rac3/Gli3/Slit1/Emx2/Wnt4/Otx1/Gli1/Jakmip1	28
GO:0006882	cellular zinc ion homeostasis	6/770	24/23210	0.000105455	0.00612032	0.00510483	Mt3/Slc39a12/Mt1/Mt2/Slc39a13/Atp7b	6
GO:0010771	negative regulation of cell morphogenesis involved in differentiation	12/770	99/23210	0.000107352	0.00615352	0.00513253	Sema5a/Kank1/Gdi1/Sema5b/Rgma/Lrp4/Plxna3/Rufy3/Cdk5/Thy1/Gorasp1/Slit1	12
GO:0110020	regulation of actomyosin structure organization	12/770	100/23210	0.00011837	0.00670232	0.00559027	Pfn2/Prkcq/Pik3r2/Mtor/Rgcc/Arhgef10l/Carmil1/Rapgef3/Lpar1/Wnt4/Tac1/Mylk3	12
GO:0044242	cellular lipid catabolic process	18/770	199/23210	0.000120729	0.00675354	0.00563299	Sirt2/Acox1/Mgll/Neu4/Prdx6/Mtor/Slc27a4/Irs2/Mt3/Sorl1/Pld2/Acaa1a/Abhd16a/Smpd2/Pex7/Echdc2/Pnpla3/Acat3	18
GO:0045686	negative regulation of glial cell differentiation	7/770	35/23210	0.00012855	0.00710546	0.00592652	Sirt2/Fgfr3/Daam2/Id2/Bmp4/Hes5/Id4	7
GO:0033559	unsaturated fatty acid metabolic process	12/770	101/23210	0.000130343	0.0071198	0.00593848	Scd2/Fads1/Acox1/Mgll/Fabp5/Abhd16a/Pdpn/Cyp2d22/Ptges2/Prxl2b/Decr2/Cyp4f14	12
GO:0055069	zinc ion homeostasis	6/770	25/23210	0.000134882	0.00728161	0.00607344	Mt3/Slc39a12/Mt1/Mt2/Slc39a13/Atp7b	6
GO:0016358	dendrite development	23/770	294/23210	0.000137908	0.00728161	0.00607344	Ntrk2/Fyn/Map1a/Map1b/Dclk1/Camsap2/Myo6/Lrp4/Zfp365/Mtor/Mfn1/Cul7/Cux2/Cyth2/Epha5/Fbxo31/Cdk5/Lpar1/Ss18l2/Gorasp1/Parp6/Klhl1/Chrna3	23
GO:0045055	regulated exocytosis	21/770	256/23210	0.00013801	0.00728161	0.00607344	Trim9/Abr/Pfn2/Grik5/Vamp2/Myo6/Gipc1/Syn2/Pld2/Sept5/Cdk5/Stx2/Rab3a/Pla2g3/Stx1a/Syt3/Adra1a/Grm8/Cplx3/Nppa/Chrna3	21
GO:0043254	regulation of protein-containing complex assembly	29/770	414/23210	0.000140791	0.00734488	0.00612621	Sirt2/Clu/Sept8/Kank1/Thra/Clip3/Trim9/Hip1r/Map1b/Pfn2/Camsap2/Parp1/Ptpn11/Pik3r2/Wasf1/Mtor/Arpc1a/Atat1/Sorl1/Slc39a12/Carmil1/Rab3a/Lcat/Rac3/Pick1/Stx1a/Rpl13a/Dnajc15/Inpp5j	29
GO:0007422	peripheral nervous system development	10/770	73/23210	0.000143194	0.0073872	0.00616151	Ntrk2/Sox10/Sirt2/Sox8/Agt/Cdk5/Bag1/Lgi4/Ngf/Ncmap	10
GO:0046883	regulation of hormone secretion	23/770	296/23210	0.000152419	0.00770133	0.00642353	Gja1/Map4k4/Gabbr1/Abat/Ptpn11/Pfkm/Dynll1/Scg5/Irs2/Adcy5/Pim3/Kdm5b/Agt/Hmgn3/Epha5/Mpc2/Arntl/Pde1c/Ptpmt1/Kcnj11/Phpt1/Tac1/Nppa	23
GO:0050796	regulation of insulin secretion	17/770	185/23210	0.0001526	0.00770133	0.00642353	Gja1/Map4k4/Abat/Ptpn11/Pfkm/Dynll1/Irs2/Adcy5/Pim3/Hmgn3/Epha5/Mpc2/Arntl/Pde1c/Ptpmt1/Kcnj11/Phpt1	17
GO:0051492	regulation of stress fiber assembly	11/770	88/23210	0.000156221	0.00779929	0.00650523	Pfn2/Prkcq/Pik3r2/Mtor/Rgcc/Arhgef10l/Carmil1/Rapgef3/Lpar1/Wnt4/Tac1	11
GO:0030072	peptide hormone secretion	22/770	278/23210	0.000162246	0.00801393	0.00668425	Cpe/Gja1/Map4k4/Gabbr1/Abat/Ptpn11/Pfkm/Dynll1/Dio2/Irs2/Adcy5/Pim3/Hmgn3/Epha5/Mpc2/Arntl/Pde1c/Stx1a/Ptpmt1/Kcnj11/Phpt1/Cplx3	22
GO:0042391	regulation of membrane potential	30/770	439/23210	0.000167743	0.0081982	0.00683795	Ntrk2/Gja1/Wdr1/Ank2/Abat/Nrcam/Grik5/Parp1/Ntsr2/Asic1/Ehd3/Kcna2/Cux2/Cdk5/Gabrb1/Kcnq2/Igsf11/Myh14/Kcnt1/Kcne1l/Stx1a/Chchd10/Slc25a33/Adra1a/Kcnj11/Tac1/Cldn19/Nppa/Htr3a/Chrna3	30
GO:0044262	cellular carbohydrate metabolic process	22/770	279/23210	0.000170766	0.00825902	0.00688868	Adcyap1r1/Pygb/Pfkm/Mtor/Irs2/Ddit4/Pdk2/Pgm2/Gnptg/Gys1/Csgalnact1/Ppargc1a/Ppp1r3c/Slc37a4/Phkg1/B3gnt7/Pygm/Ppp1r1a/Idnk/Ppp1r3g/Inpp5j/Fbp1	22
GO:0030073	insulin secretion	19/770	223/23210	0.00017365	0.00831191	0.0069328	Gja1/Map4k4/Abat/Ptpn11/Pfkm/Dynll1/Irs2/Adcy5/Pim3/Hmgn3/Epha5/Mpc2/Arntl/Pde1c/Stx1a/Ptpmt1/Kcnj11/Phpt1/Cplx3	19
GO:0006650	glycerophospholipid metabolic process	19/770	225/23210	0.000194867	0.00918684	0.00766256	Serinc5/Gpam/Inppl1/Prdx6/Pik3r2/Fabp5/Ptdss1/Ip6k2/Pld2/Abhd16a/Pla2g3/Pisd/Lcat/Acp6/Ptpmt1/Tmem150a/Inpp5j/Pnpla3/Pigz	19
GO:0001503	ossification	27/770	381/23210	0.000195886	0.00918684	0.00766256	Gja1/Sox8/Gabbr1/Thra/Plxnb1/Fgfr3/Inppl1/Lrp4/Trp53inp2/Id2/Ank/Id3/Npr2/Bmp4/Cbs/Id4/Csgalnact1/Bmpr1b/Pex7/Gdpd2/Gli3/Zbtb16/Wnt4/Fhl2/Gli1/Tac1/Atp6v0a4	27
GO:0016053	organic acid biosynthetic process	22/770	282/23210	0.000198744	0.0092277	0.00769664	Scd2/Fads2/Fads1/Psat1/Abat/Tecr/Acsbg1/Mgll/Fabp5/Bcat1/Acss2/Agt/Csad/Cbs/Mthfr/Plod2/Acot11/Asns/Ptges2/Prxl2b/Decr2/Aass	22
GO:0048284	organelle fusion	13/770	122/23210	0.000210614	0.009682	0.00807556	Sept8/Trim9/Grik5/Vamp2/Vat1/Mfn1/Miga1/Stx2/Miga2/Rab3a/Stx1a/Syt3/Cplx3	13
GO:0031644	regulation of nervous system process	16/770	173/23210	0.000219368	0.00996174	0.00830888	Sox10/Abat/Mgll/Tmem100/Fabp5/S100b/Mtor/Cux2/Agt/Shisa9/Igsf11/Stx1a/Fgfbp3/Nptx1/Adra2c/Ncmap	16
GO:0016079	synaptic vesicle exocytosis	14/770	139/23210	0.000221502	0.00996174	0.00830888	Trim9/Pfn2/Grik5/Vamp2/Myo6/Gipc1/Sept5/Stx2/Rab3a/Stx1a/Adra1a/Grm8/Cplx3/Chrna3	14
GO:0008361	regulation of cell size	18/770	209/23210	0.000223136	0.00996174	0.00830888	Aqp4/Sema5a/Gdi1/Map1b/Mgll/Sema5b/Rnd2/Rgma/Plxna3/Mtor/Rufy3/Rapgef3/Akt1s1/Cdk5/L1cam/Slit1/Sctr/Ngf	18

## Sheet: Table5_GOs_upreg_p005
Gene Ontology Biological Processes enriched in upregulated genes in Tns3iKO OPCs/iOLs compared to controls
ID	Description	GeneRatio	BgRatio	pvalue	p.adjust	qvalue	geneID	Count
GO:0006281	double-strand break repair	64/1197	220/23210	8.22615e-31	2.7208e-28	1.92881e-28	Rad21/Nsd2/Nucks1/Dek/Smchd1/Mcm6/Rpa1/H2afx/Mcm5/Mcm2/Mcm7/Atm/Slf2/Mcm4/Lig1/Foxm1/Mcm3/Rnf168/Rfwd3/Rnf169/Recql/Mre11a/Rad50/Timeless/Pola1/Rbbp8/Ddx11/Spidr/Xrcc2/Brca2/Rpa2/Was/Mms22l/Blm/Tonsl/Dna2/Fignl1/Slf1/Polq/Rad54l/Cdc45/Rad51ap1/Chek1/Esco2/Chek2/Rad51/Usp51/Recql4/Gins2/Gen1/Cdca5/Mcm8/Trip13/Parpbp/Rad54b/Rmi2/Brip1/Rad51c/Cgas/Eme1/Tex15/Rad51b/Aunip/Radx	64
GO:0007346	G2/M transition of mitotic cell cycle	36/1197	110/23210	8.56436e-20	1.13306e-17	8.03247e-18	Ccnd1/Calm2/Rad21/Lmnb1/Ccng1/Topbp1/Ccna2/Ctc1/Cenpf/Atm/Foxm1/Cdk2/Ccnb1/Cdk1/Cdkn1a/Cdc25b/Mre11a/Plk1/Skp2/Birc5/Dtl/Clspn/Kif14/Blm/Donson/Cdc25c/Ticrr/Mastl/Chek1/Fbxo5/Chek2/Cdc6/Rad51c/Rad51b/Orc1/Cdkn2b	36
GO:0044770	positive regulation of cell adhesion	63/1197	411/23210	7.74265e-15	5.25309e-13	3.72399e-13	Sirpa/P2ry12/Flna/Tpm1/Vsir/Vcam1/Lims1/Nckap1l/Nfkbiz/Bmp7/Iqgap1/Tgfbr2/Afdn/Mdk/Ccr5/Il6ra/Atm/Ets1/Tgfb1/Dock8/Piezo1/Tek/Efnb2/Ptprc/Syk/Ikzf1/Apbb1ip/Cdk6/Vav1/Rreb1/Ptpn6/Cyth3/Hes1/Npnt/Zfhx3/Itga4/Vit/Adam19/Itgb2/Efnb1/Cd86/Ccdc88b/Ptafr/Malt1/Blm/Sash3/Icosl/Emilin1/Il1rl2/Fmn1/Disc1/Ripk2/Ret/Ceacam1/Cass4/Itgb3/Il7r/Foxf1/Ccr2/Il2rg/Btnl2/Cd28/Spta1	63
GO:0045786	positive regulation of cell-cell adhesion	40/1197	242/23210	6.30035e-11	2.62531e-09	1.86112e-09	Sirpa/Vsir/Vcam1/Nckap1l/Nfkbiz/Bmp7/Tgfbr2/Afdn/Mdk/Ccr5/Il6ra/Ets1/Tgfb1/Dock8/Piezo1/Efnb2/Ptprc/Syk/Ikzf1/Hes1/Itga4/Adam19/Itgb2/Efnb1/Cd86/Ccdc88b/Ptafr/Malt1/Blm/Sash3/Icosl/Il1rl2/Ripk2/Ceacam1/Il7r/Ccr2/Il2rg/Btnl2/Cd28/Spta1	40
GO:0006302	regulation of cell adhesion mediated by integrin	11/1197	41/23210	4.95375e-06	9.19834e-05	6.52084e-05	P2ry12/Nckap1l/Lyn/Piezo1/Syk/Ptpn6/Cyp1b1/Epha2/Ret/Lpxn/Itgb3	11
GO:0000724	regulation of actin cytoskeleton organization	38/1197	344/23210	8.72408e-06	0.000149896	0.000106263	Csf1r/Rhob/Flna/Tpm1/Tgfbr1/Wasf2/Cotl1/Eln/Akap13/Nckap1l/Rock2/Rhoq/Evl/Pam/Vasp/Mdk/Mef2c/Cd2ap/Stmn1/Tgfb1/Tek/Pecam1/Phldb2/Hcls1/Arhgdib/Myo1f/Baiap2/Ect2/Was/Tmod1/Sh3bp1/Fmn1/Kank4/Plekhh2/Synpo/Itgb3/Met/Spta1	38
GO:0000086	ERK1 and ERK2 cascade	35/1197	323/23210	2.92392e-05	0.000433429	0.000307264	Pdgfra/Csf1r/Jun/Sirpa/Zfp36l2/Trf/Rap1b/Dusp6/Spry1/Dab2ip/Lyn/Akap12/Esr1/Sema7a/Ctsh/Tgfb1/Cflar/Tiam1/Tek/P2ry6/Ptprc/Syk/Ptpn6/Npnt/Pdgfb/Iqgap3/Gpr183/Tnfrsf11a/Rras/Emilin1/Fam83d/Pde8a/Epha2/Ripk2/Itgb3	35
GO:0045785	intrinsic apoptotic signaling pathway in response to DNA damage by p53 class mediator	10/1197	43/23210	5.16663e-05	0.000688711	0.000488237	Zfp385a/Tmem109/Cdkn1a/Phlda3/Aen/Atad5/Brca2/Bbc3/Chek2/Pmaip1	10
GO:0009314	reactive oxygen species metabolic process	31/1197	288/23210	9.23494e-05	0.0011209	0.000794624	Sirpa/Cx3cr1/Rock2/Tgfbr2/Mapk14/Sh3pxd2a/Esr1/Gpx3/Tgfb1/Foxm1/Cd34/Cflar/Syk/Itgam/Vav1/Fbln5/Cdkn1a/Pdgfb/Prdx4/Sesn2/Itgb2/Prcp/Dhfr/Cyp1b1/Rab27a/Pon3/Fancc/Ncf4/Met/Ulbp1/Raet1b	31
GO:0071478	integrin-mediated signaling pathway	14/1197	89/23210	0.000177695	0.00196729	0.00139464	Flna/Itgb5/Lims1/Adam15/Zyx/Sema7a/Syk/Vav1/Fyb/Itga4/Itgb2/Itga8/Itgb3/Madcam1	14
GO:0007159	signal transduction by p53 class mediator	18/1197	135/23210	0.00020265	0.0022021	0.0015611	Zfp385a/Atm/Foxm1/Tmem109/Cdkn1a/Phlda3/Sesn2/Aen/Atad5/Brca2/Eda2r/Bbc3/E2f1/Chek2/Pidd1/E2f7/Pmaip1/Tfap4	18
GO:0002573	cellular response to oxidative stress	27/1197	268/23210	0.00072007	0.00629853	0.00446512	Pdgfra/Fos/Jun/Rhob/Epas1/Sirpa/Hnrnpd/Trp53inp1/Mtr/Cflar/Fbln5/Stat6/Sesn2/Ect2/Foxp1/Dhfr/Cyp1b1/Fancd2/Melk/Btk/Prr5l/Fancc/Pde8a/Vrk2/Met/Ddias/Hspb1	27
GO:0022409	negative regulation of cell cycle process	62/1197	225/23210	1.98674e-28	5.25691e-26	3.7267e-26	Ccnd1/Zfp36l2/Rad21/Smc1a/Bmp7/Smc3/Cdk5rap2/Dab2ip/Ccng1/Topbp1/Gas1/Esr1/Atm/Cep192/Ccnb1/Msh6/Rfwd3/Cdk1/Cdkn1a/Rbl1/Jade1/Cenpe/Bub1b/Mre11a/Mad2l1/Plk1/Kifc1/Aurkb/Anapc15/Dact1/Bub1/Lrrk1/Birc5/Ccnf/Rpa2/Dtl/Mdm1/Cdt1/Clspn/Cast/Blm/Ttk/Nek2/Pttg1/Donson/Ticrr/Mtbp/Ndc80/Chek1/Fbxo5/Chek2/Pidd1/Recql4/Cdc6/E2f7/Gen1/Trip13/Tfap4/Spdl1/Haspin/Orc1/Cdkn2b	62
GO:0002366	positive regulation of cell cycle process	57/1197	249/23210	7.19439e-22	1.08779e-19	7.71152e-20	Ccnd1/Rad21/Ccnd2/Rock2/Lmnb1/Dab2ip/Racgap1/Lrp5/Slf2/Tgfb1/Ccnb1/Nusap1/Cdk1/Nup62/Cdkn1a/Pdgfb/Ube2c/Cenpe/Crlf3/Spag5/Ect2/Cdc25b/Mad2l1/Kif23/Atad5/Fen1/Larp7/Aurkb/Birc5/Plk4/Ddx11/Kif20b/Dbf4/Dtl/Cdt1/Sgo2a/Kif14/Cdc25c/Slf1/Mtbp/Ndc80/Cenpj/Fam83d/Cdc45/Fbxo5/Pidd1/Edn3/Cdc6/E2f7/Ccne1/Gen1/Cdca5/Met/Rad51c/Rad51b/Orc1/Cd28	57
GO:0022407	DNA integrity checkpoint	32/1197	111/23210	6.10714e-16	5.12999e-14	3.63673e-14	Ccnd1/Top2a/Mapk14/Ccng1/Topbp1/Cdc5l/Atm/Rfwd3/Cdk1/Cdkn1a/Mre11a/Timeless/Plk1/Tipin/Map3k20/Rpa2/Dtl/Cdt1/Clspn/Blm/Dna2/Donson/Ticrr/Wdr76/E2f1/Chek1/Chek2/Pidd1/Cdc6/Eme1/Stk33/Orc1	32
GO:0009411	DNA repair	113/1197	464/23210	2.73053e-45	1.80625e-42	1.28048e-42	Rad21/Nsd2/Nucks1/Ssrp1/Smc1a/Smc3/Dek/Supt16/Smchd1/Pcna/Topbp1/Mdc1/Mcm6/Rpa1/Cdc5l/H2afx/Smc4/Mcm5/Rfc1/Mcm2/Mcm7/Atm/Smc2/Slf2/Mcm4/Usp1/Lig1/Uhrf1/Foxm1/Mcm3/Paxip1/Cdk2/Rnf168/Msh6/Rfwd3/Pold1/Gtf2h2/Pold3/Rnf169/Pole/Recql/Kif22/Pclaf/Mre11a/Chaf1a/Rad50/Timeless/Wdhd1/Fen1/Hmga1/Pola1/Rbbp8/Ddx11/Spidr/Fanca/Polh/Xrcc2/Brca2/Rpa2/Dtl/Clspn/Was/Mms22l/Blm/Tonsl/Fancd2/Uchl5/Dna2/Pttg1/Polk…	113
GO:0104004	regulation of mitotic cell cycle	115/1197	493/23210	4.52662e-44	2.39549e-41	1.6982e-41	Lgmn/Btg2/Ccnd1/Zfp36l2/Rad21/Mki67/Ccnd2/Top2a/Smc1a/Lmnb1/Bmp7/Ttc28/Smc3/Cdk5rap2/Btg1/Iqgap1/Stag1/Lrp5/Ccng1/Plk2/Topbp1/Ctc1/Gas1/Cenpf/Tpx2/Esr1/Atm/Kif11/Slf2/Tgfb1/Cep192/Cdk2/Ccnb1/Incenp/Tacc3/Nusap1/Rfwd3/Ptpn6/Cdk1/Hes1/Nup62/Cdkn1a/Pdgfb/Ube2c/Rbl1/Jade1/Cenpe/Cdc25b/Bub1b/Mre11a/Mad2l1/Rad50/Plk1/Atad5/Tipin/Larp7/Aurkb/Anapc15/Dact1/Bub1/Birc5/Kntc1/Wee1/Kif20b/Map3k20/Dbf4/Brca2/…	115
GO:1903037	cell cycle phase transition	99/1197	393/23210	4.20651e-41	2.02371e-38	1.43464e-38	Ccnd1/Zfp36l2/Calm2/Rad21/Ccnd2/Lmnb1/Cdk5rap2/Nasp/Ccng1/Plk2/Topbp1/Ccna2/Ctc1/Gas1/Cenpf/Atm/Tgfb1/Foxm1/Cep192/Paxip1/Usp37/Cdk2/Ccnb1/Tacc3/Ptprc/Nfatc1/Ccng2/Rfwd3/Ptpn6/Cdkn2c/Cdk1/Cdkn1a/Ube2c/Rbl1/Jade1/Pole/Cenpe/Crlf3/Ctdp1/Cdc25b/Bub1b/Iqgap3/Slbp/Mre11a/Mad2l1/Timeless/Plk1/Atad5/Tipin/Larp7/Ccnb2/Skp2/Aurkb/Anapc15/Dact1/Bub1/Lrrk1/Birc5/Rbbp8/Tcf19/Ccnf/Dbf4/Rpa2/Dtl/Cdt1/Clspn/Kif…	99
GO:0007015	negative regulation of cell cycle	97/1197	452/23210	5.01209e-34	1.89457e-31	1.34309e-31	Rhob/Btg2/Ccnd1/Zfp36l2/Rad21/Top2a/Smc1a/Bmp7/Smc3/Cdk5rap2/Btg1/Dab2ip/Pmp22/Mapk14/Ccng1/Plk2/Topbp1/Cdc5l/Gas1/Esr1/Trp53inp1/Atm/Ets1/Tgfb1/Foxm1/Cep192/Ccnb1/Cdk6/Msh6/Rfwd3/Cdkn2c/Cdk1/Cdkn1a/Rbl1/Jade1/Cenpe/Crlf3/Bub1b/Mre11a/Mad2l1/Timeless/Plk1/Prr11/Tipin/Kifc1/Aurkb/Anapc15/Dact1/Bub1/Lrrk1/Birc5/Kntc1/Wee1/Ccnf/Map3k20/Rpa2/Dtl/Mdm1/Cdt1/Clspn/Cast/Zwilch/Blm/Ttk/Nek2/Dna2/Pttg1/Don…	97
GO:1902107	double-strand break repair via homologous recombination	45/1197	127/23210	4.57613e-26	9.31419e-24	6.60297e-24	Nucks1/Smchd1/Mcm6/Rpa1/H2afx/Mcm5/Mcm2/Mcm7/Atm/Mcm4/Mcm3/Rfwd3/Recql/Mre11a/Timeless/Rbbp8/Spidr/Xrcc2/Brca2/Rpa2/Was/Mms22l/Blm/Tonsl/Fignl1/Polq/Rad54l/Cdc45/Rad51ap1/Chek1/Rad51/Usp51/Recql4/Gins2/Gen1/Mcm8/Parpbp/Rad54b/Rmi2/Rad51c/Cgas/Tex15/Rad51b/Aunip/Radx	45
GO:0045637	response to radiation	59/1197	395/23210	1.77237e-13	1.00853e-11	7.14965e-12	Egr1/Jun/Rhob/Junb/Jund/Ccnd1/Ccnd2/Nucks1/Fmr1/Mapk14/Pcna/Topbp1/H2afx/Trp53inp1/Atm/Usp1/N4bp1/Rnf168/Ptprc/Msh6/Tmem109/Rfwd3/Pold1/Cdkn1a/Pbk/Pold3/Ect2/Aen/Pclaf/Casp7/Tipin/Aurkb/Bmf/Spidr/Map3k20/Polh/Xrcc2/Brca2/Dtl/Blm/Fancd2/Sfrp2/Polk/Fignl1/Ticrr/Primpol/Bbc3/Rad54l/Apobec1/Rad18/Rad51ap1/Chek1/Chek2/Rad51/Synpo/Pmaip1/Rad54b/Ddias/Trpm1	59
GO:0043062	cellular response to radiation	34/1197	154/23210	4.14945e-13	2.28739e-11	1.62156e-11	Egr1/Rhob/Ccnd2/Nucks1/Fmr1/Mapk14/Pcna/H2afx/Trp53inp1/Atm/N4bp1/Rnf168/Tmem109/Pold1/Cdkn1a/Pbk/Pold3/Ect2/Aurkb/Bmf/Spidr/Map3k20/Polh/Blm/Sfrp2/Polk/Fignl1/Bbc3/Rad51ap1/Chek1/Chek2/Rad51/Ddias/Trpm1	34
GO:0007050	leukocyte cell-cell adhesion	49/1197	319/23210	7.21012e-12	3.34701e-10	2.37275e-10	Sirpa/Cx3cr1/Vsir/Msn/Vcam1/Nckap1l/Nfkbiz/Bmp7/Selplg/Tgfbr2/Mdk/Il6ra/Ets1/Tgfb1/Dock8/Pecam1/Efnb2/Ptprc/Syk/Ikzf1/Itgam/Ptpn6/Hes1/Stk10/Itga4/Gcnt1/Itgb2/Rac2/Efnb1/Cd86/Ccdc88b/Ptafr/Nt5e/Malt1/Blm/Sash3/Icosl/Il1rl2/Tnfaip8l2/Ripk2/Ceacam1/Il7r/Ccr2/Il2rg/Btnl2/Cd28/Spta1/Madcam1/Btla	49
GO:0033628	myeloid leukocyte differentiation	38/1197	216/23210	2.82973e-11	1.2376e-09	8.77351e-10	Fos/Csf1r/Jun/Junb/Trf/Sp3/Tgfbr2/Inpp5d/Mapk14/Sh3pxd2a/Lyn/Mef2c/Trib1/Lbr/Tgfb1/Tmem64/Spi1/Ikzf1/Nfatc1/Cdk6/Itgam/Hcls1/Ubash3b/Klf10/Inpp4b/Casp8/Lrrk1/Tal1/Gpr183/Tnfrsf11a/Cbfa2t3/Hhex/Relb/Epha2/Ceacam1/Itgb3/Irf4/Efna4	38
GO:0032956	leukocyte activation involved in immune response	42/1197	269/23210	1.34854e-10	5.32574e-09	3.7755e-09	Cx3cr1/Nsd2/Nfkbiz/Lcp1/Mdk/Lyn/Tgfb1/Dock11/Paxip1/Dock2/Rnf168/Ptprc/Syk/Apbb1ip/Itgam/Msh6/Stat6/Myo1f/Cd180/Plcl2/Itgb2/Rac2/Atad5/Ptafr/Foxp1/Malt1/Gpr183/Icosl/Rab27a/Btk/Relb/Ripk2/Ung/Exo1/Enpp3/Foxf1/Ccr2/Adora3/Irf4/Slamf6/Cd28/Gapt	42
GO:0031589	regulation of cell-cell adhesion	50/1197	394/23210	4.13526e-09	1.36774e-07	9.69609e-08	Sirpa/Vsir/Vcam1/Nckap1l/Nfkbiz/Bmp7/Tgfbr2/Mapk14/Afdn/Mdk/Lyn/Sh2b3/Ccr5/Il6ra/Ets1/Tgfb1/Dock8/Jag1/Akna/Piezo1/Efnb2/Ptprc/Syk/Ikzf1/Ptpn6/Hes1/Ubash3b/Itga4/Adam19/Itgb2/Efnb1/Cd86/Ccdc88b/Ptafr/Malt1/Blm/Bmp6/Sash3/Icosl/Il1rl2/Tnfaip8l2/Ripk2/Ceacam1/Il7r/Ccr2/Il2rg/Btnl2/Cd28/Spta1/Btla	50
GO:0070371	response to UV	26/1197	137/23210	7.24656e-09	2.33834e-07	1.65768e-07	Ccnd1/Fmr1/Pcna/Trp53inp1/Usp1/N4bp1/Rnf168/Msh6/Pold1/Cdkn1a/Pbk/Pold3/Pclaf/Casp7/Tipin/Aurkb/Bmf/Polh/Brca2/Dtl/Polk/Primpol/Rad18/Chek1/Pmaip1/Ddias	26
GO:0032147	cellular response to environmental stimulus	40/1197	292/23210	1.75433e-08	5.46112e-07	3.87147e-07	Actb/Egr1/Rhob/Ccnd2/Nucks1/Fmr1/Mapk14/Pcna/Sipa1/H2afx/Trp53inp1/Atm/N4bp1/Piezo1/Rnf168/Tmem109/Pold1/Cdkn1a/Pbk/Pold3/Ect2/Rcsd1/Aurkb/Bmf/Spidr/Map3k20/Polh/Blm/Sfrp2/Polk/Fignl1/Bbc3/Rad51ap1/Chek1/Relb/Chek2/Rad51/Ddias/Capn3/Trpm1	40
GO:0032970	regulation of leukocyte cell-cell adhesion	38/1197	287/23210	9.83225e-08	2.68208e-06	1.90136e-06	Sirpa/Vsir/Vcam1/Nckap1l/Nfkbiz/Tgfbr2/Mdk/Il6ra/Ets1/Tgfb1/Dock8/Efnb2/Ptprc/Syk/Ikzf1/Ptpn6/Hes1/Itga4/Itgb2/Efnb1/Cd86/Ccdc88b/Ptafr/Malt1/Blm/Sash3/Icosl/Il1rl2/Tnfaip8l2/Ripk2/Ceacam1/Il7r/Ccr2/Il2rg/Btnl2/Cd28/Spta1/Btla	38
GO:0033630	actin filament organization	46/1197	400/23210	3.27886e-07	8.22356e-06	5.82981e-06	Rhob/Sirpa/Flna/Tpm1/Myh10/Actn4/Trf/Tgfbr1/Itgb5/Tpm3/Wasf2/Cotl1/Eln/Nckap1l/Rock2/Rhoq/Evl/Lcp1/Zyx/Vasp/Cd2ap/Stmn1/Cgnl1/Pecam1/Sh3kbp1/Myo1b/Phldb2/Hcls1/Diaph2/Rflnb/Baiap2/Rac2/Cap2/Was/Tmod1/Diaph3/Sh3bp1/Fmn1/Kank4/Plekhh2/Synpo/Cass4/Met/Rflna/Espn/Spta1	46
GO:0042771	positive regulation of leukocyte differentiation	26/1197	168/23210	5.1408e-07	1.21451e-05	8.60988e-06	Fos/Csf1r/Jun/Vsir/Nckap1l/Nfkbiz/Tgfbr2/Inpp5d/Mdk/Trib1/Tgfb1/Tmem64/Ptprc/Syk/Ikzf1/Hcls1/Klf10/Casp8/Malt1/Sash3/Il1rl2/Ripk2/Itgb3/Il7r/Ccr2/Il2rg	26
GO:0006978	regulation of myeloid cell differentiation	30/1197	215/23210	7.00546e-07	1.57089e-05	1.11362e-05	Fos/Csf1r/Zfp36/Jun/Nfkbia/Nckap1l/Inpp5d/Mapk14/Hmgb2/Lyn/Mef2c/Trib1/Ets1/Tgfb1/Jag1/Lmo2/Tmem64/Rcor1/Spi1/Ikzf1/Cdk6/Ncapg2/Hcls1/Ubash3b/Klf10/Inpp4b/Casp8/Tal1/Ceacam1/Itgb3	30
GO:0072593	extracellular structure organization	34/1197	272/23210	1.73625e-06	3.53395e-05	2.50527e-05	Pdgfra/Mmp15/Lamc1/Ctss/Tgfbr1/Eln/Plod1/Pmp22/Lcp1/Col18a1/Vwa1/Qsox1/Col5a2/Ets1/Tgfb1/Cflar/Tnfrsf1b/Fbln5/Npnt/Phldb2/B4galt1/Aebp1/Prdx4/Vit/Col23a1/Itga8/Cyp1b1/Sfrp2/Emilin1/Postn/Col2a1/Itgb3/Lum/Foxf1	34
GO:0030168	cell cycle arrest	22/1197	138/23210	2.28886e-06	4.51964e-05	3.20404e-05	Ccnd1/Dab2ip/Pmp22/Gas1/Trp53inp1/Atm/Tgfb1/Foxm1/Cdkn2c/Cdkn1a/Crlf3/Prr11/Map3k20/Cast/Mtbp/Chek2/Pidd1/Tfap4/Ddias/Cdkn3/Cdkn2b/Irf6	22
GO:0007160	cell-substrate adhesion	37/1197	339/23210	1.49205e-05	0.000244457	0.000173299	Sirpa/Lamc1/Flna/Actn4/Srgap2/Itgb5/Vcam1/Lims1/Adam15/Iqgap1/Zyx/Mdk/Nid2/Fndc3b/Jag1/Tiam1/Tek/Pecam1/Cdk6/Rreb1/Npnt/Phldb2/Parvg/Itga4/Vit/Itgb2/Rac2/Itga8/Bcl2l11/Kif14/Emilin1/Postn/Fmn1/Disc1/Cass4/Itgb3/Foxf1	37
GO:0007229	activation of protein kinase activity	29/1197	248/23210	3.47013e-05	0.0005006	0.000354883	Trf/Tgfbr1/Grm5/Dab2ip/Tgfbr2/Tpx2/Il6ra/Map3k3/Ptprc/Syk/Pdgfb/Stk10/Ect2/Iqgap3/Map3k20/Clspn/Bora/Kif14/Malt1/Map3k14/Mdfic/Map3k8/Ripk2/Ret/Tlr1/Itgb3/Met/Map4k1/Lpar2	29
GO:0072331	regulation of actin filament-based process	40/1197	393/23210	3.48112e-05	0.0005006	0.000354883	Csf1r/Rhob/Flna/Tpm1/Myh9/Tgfbr1/Wasf2/Cotl1/Eln/Akap13/Nckap1l/Rock2/Rhoq/Evl/Pam/Vasp/Mdk/Mef2c/Cd2ap/Stmn1/Tgfb1/Tek/Pecam1/Phldb2/Hcls1/Arhgdib/Myo1f/Baiap2/Ect2/Was/Tmod1/Sh3bp1/Fmn1/Kank4/Plekhh2/Synpo/Gja5/Itgb3/Met/Spta1	40
GO:0070372	positive regulation of cell adhesion mediated by integrin	7/1197	20/23210	4.08365e-05	0.000568702	0.000403161	P2ry12/Nckap1l/Piezo1/Syk/Ptpn6/Ret/Itgb3	7
GO:2000377	DNA damage response, signal transduction by p53 class mediator resulting in transcription of p21 class mediator	6/1197	15/23210	6.2168e-05	0.000805981	0.000571372	Zfp385a/Foxm1/Cdkn1a/Brca2/Chek2/Tfap4	6
GO:2000146	platelet activation	13/1197	76/23210	0.000126023	0.00147221	0.00104367	Pdgfra/P2ry12/Evl/Entpd1/Lyn/Sh2b3/Syk/Ptpn6/Pdgfb/Ubash3b/Ceacam1/Itgb3/P2rx1	13
GO:0030330	cell-matrix adhesion	24/1197	204/23210	0.000144659	0.00165089	0.00117034	Sirpa/Itgb5/Vcam1/Lims1/Adam15/Iqgap1/Zyx/Nid2/Jag1/Tiam1/Tek/Pecam1/Cdk6/Npnt/Phldb2/Itga4/Itgb2/Itga8/Bcl2l11/Emilin1/Postn/Fmn1/Disc1/Itgb3	24
GO:0008625	regulation of ERK1 and ERK2 cascade	31/1197	306/23210	0.000275227	0.00286352	0.00202999	Pdgfra/Csf1r/Jun/Sirpa/Rap1b/Dusp6/Spry1/Dab2ip/Lyn/Akap12/Esr1/Sema7a/Tgfb1/Cflar/Tiam1/Tek/P2ry6/Ptprc/Syk/Ptpn6/Npnt/Pdgfb/Gpr183/Tnfrsf11a/Rras/Emilin1/Fam83d/Pde8a/Epha2/Ripk2/Itgb3	31
GO:0072332	regulation of reactive oxygen species metabolic process	23/1197	200/23210	0.000275421	0.00286352	0.00202999	Sirpa/Cx3cr1/Rock2/Tgfbr2/Mapk14/Esr1/Tgfb1/Foxm1/Cd34/Cflar/Syk/Itgam/Fbln5/Cdkn1a/Pdgfb/Itgb2/Prcp/Dhfr/Cyp1b1/Rab27a/Pon3/Ulbp1/Raet1b	23
GO:0062197	negative regulation of cell motility	29/1197	281/23210	0.000313676	0.00321078	0.00227617	Rhob/Abhd2/Cx3cr1/Tpm1/Srgap2/Adam15/Evl/Dab2ip/Igfbp3/Afdn/Mef2c/Trib1/Ccr5/Trp53inp1/Tgfb1/Jag1/Phldb2/Arhgdib/Pdgfb/Ldlrad4/Erdr1/Was/Cyp1b1/Rras/Sfrp2/Emilin1/Podn/Adora3/Ccdc125	29
GO:0034599	DNA damage response, signal transduction by p53 class mediator	11/1197	63/23210	0.000341139	0.00339343	0.00240566	Zfp385a/Atm/Foxm1/Cdkn1a/Sesn2/Brca2/Chek2/Pidd1/E2f7/Pmaip1/Tfap4	11
GO:0070588	extrinsic apoptotic signaling pathway via death domain receptors	12/1197	75/23210	0.000430727	0.00411445	0.0029168	Rock2/Sort1/Dab2ip/Hmgb2/Cflar/Casp8ap2/Casp8/Sfrp2/Itprip/Pidd1/Tnfrsf23/Tnfrsf10b	12
GO:0030038	intrinsic apoptotic signaling pathway by p53 class mediator	12/1197	77/23210	0.000551238	0.00499512	0.00354112	Zfp385a/Tmem109/Cdkn1a/Phlda3/Aen/Atad5/Brca2/Eda2r/Bbc3/E2f1/Chek2/Pmaip1	12
GO:0006260	cellular response to chemical stress	31/1197	322/23210	0.000657931	0.00586157	0.00415536	Pdgfra/Fos/Jun/Rhob/Epas1/Sirpa/Hnrnpd/Trp53inp1/Atm/Mtr/Cflar/Fbln5/Stat6/Sesn2/Ect2/Rcsd1/Foxp1/Dhfr/Cyp1b1/Fancd2/Melk/Btk/Prr5l/Fancc/Pde8a/Relb/Vrk2/Met/Ddias/Hspb1/Capn3	31
GO:0000280	calcium ion transmembrane transport	28/1197	283/23210	0.000769772	0.00670006	0.00474977	P2ry12/Atp2b1/Tspan13/Tpcn1/Fmr1/Asph/Lyn/Ano6/Ccr5/Tgfb1/Slc25a25/P2ry6/Ptprc/Itpr1/Pik3cg/Ptpn6/Aplnr/Ubash3b/Itpr3/Plcb2/Atp2a3/Trpv2/Tlr9/Bbc3/Itgb3/Tmem37/Gpr35/Capn3	28
GO:0007059	contractile actin filament bundle assembly	14/1197	103/23210	0.000820734	0.00705085	0.00499846	Tpm1/Tgfbr1/Itgb5/Wasf2/Eln/Rock2/Evl/Zyx/Stmn1/Phldb2/Was/Kank4/Synpo/Met	14
GO:0048285	DNA replication	93/1197	242/23210	2.14626e-56	1.1358e-52	8.05187e-53	Jun/Nucks1/Ssrp1/Smc1a/Smc3/Supt16/Rrm1/Nasp/Pcna/Ccna2/Mcm6/Ctc1/Rpa1/Mcm5/Rfc1/Mcm2/Mcm7/Mcm4/Lig1/Mcm3/Usp37/Rfc2/Cdk2/Rrm2/Msh6/Rfwd3/Cdk1/Rbms1/Pold1/Pold3/Pole/Recql/Prim2/Fam111a/Pclaf/Slbp/Mre11a/Chaf1a/Timeless/Wdhd1/Atad5/Fen1/Pola2/Tipin/Pola1/Ddx11/Rfc3/Prim1/Polh/Rfc5/Dbf4/Brca2/Rpa2/Dtl/Cdt1/Mms22l/Blm/Tonsl/Dna2/Polk/Donson/Ticrr/Primpol/Chtf18/Pif1/Polq/Mcm10/Cdc45/Rfc4/Chaf1b/Ccn…	93
GO:0006261	nuclear division	114/1197	408/23210	2.631e-52	6.96164e-49	4.93521e-49	Flna/Rad21/Mki67/Top2a/Smc1a/Bmp7/Smc3/Ncapd2/Cdk5rap2/Racgap1/Stag1/Lrp5/Topbp1/Smc4/Tpx2/Esr1/Atm/Kif11/Smc2/Slf2/Aspm/Tgfb1/Cep192/Ndc1/Ccnb1/Incenp/Tacc3/Nusap1/Ncapd3/Cenpc1/Knstrn/Cdc20/Nup62/Espl1/Pdgfb/Ube2c/Mybl1/Cenpe/Spag5/Ctdp1/Ncaph/Kif22/Cdc25b/Bub1b/Cdca8/Mre11a/Nuf2/Mad2l1/Kif23/Kif18b/Plk1/Kif2c/Aaas/Kifc1/Aurkb/Anapc15/Bub1/Lrrk1/Birc5/Ncapg/Kif20b/Fanca/Brca2/Cdt1/Bora/Sgo2a/Ki…	114
GO:0098813	chromosome segregation	100/1197	315/23210	1.41327e-51	2.49301e-48	1.76733e-48	Rad21/Mki67/Hjurp/Top2a/Smc1a/Smc3/Ncapd2/Cdk5rap2/Racgap1/Stag1/Smc4/Cenpf/Atm/Smc2/Slf2/Cep192/Ndc1/Ccnb1/Incenp/Tacc3/Nusap1/Ncapd3/Cenpc1/Knstrn/Cdc20/Nup62/Espl1/Cenpe/Spag5/Ect2/Ncaph/Kif22/Bub1b/Cdca8/Mre11a/Nuf2/Mad2l1/Kif23/Knl1/Kif18b/Plk1/Fen1/Kif2c/Aurkb/Anapc15/Bub1/Cenpq/Lrrk1/Birc5/Pmf1/Ncapg/Ddx11/Brca2/Cdt1/Sgo2a/Cdca2/Spc25/Kif14/Dsn1/Ttk/Fancd2/Kif4/Nek2/Pttg1/Slf1/Psrc1/Chtf18…	100
GO:0140014	organelle fission	116/1197	455/23210	1.07803e-48	1.42623e-45	1.01108e-45	Flna/Rad21/Mki67/Top2a/Smc1a/Bmp7/Smc3/Ncapd2/Cdk5rap2/Racgap1/Stag1/Lrp5/Topbp1/Smc4/Tpx2/Esr1/March5/Atm/Kif11/Smc2/Slf2/Aspm/Tgfb1/Cep192/Ndc1/Ccnb1/Incenp/Tacc3/Nusap1/Ncapd3/Cenpc1/Knstrn/Cdc20/Nup62/Espl1/Pdgfb/Ube2c/Mybl1/Cenpe/Spag5/Ctdp1/Ncaph/Kif22/Cdc25b/Bub1b/Cdca8/Mre11a/Nuf2/Mad2l1/Kif23/Kif18b/Plk1/Kif2c/Aaas/Kifc1/Aurkb/Anapc15/Bub1/Lrrk1/Birc5/Ncapg/Kif20b/Fanca/Brca2/Cdt1/Bora/S…	116
GO:0000819	DNA-dependent DNA replication	65/1197	133/23210	9.54485e-48	1.01023e-44	7.16165e-45	Nucks1/Smc1a/Smc3/Pcna/Mcm6/Rpa1/Mcm5/Mcm2/Mcm7/Mcm4/Lig1/Mcm3/Rfc2/Cdk2/Msh6/Rfwd3/Pold1/Pold3/Pole/Recql/Prim2/Slbp/Mre11a/Timeless/Wdhd1/Atad5/Pola2/Tipin/Pola1/Ddx11/Rfc3/Prim1/Rfc5/Dbf4/Brca2/Cdt1/Mms22l/Blm/Tonsl/Dna2/Donson/Ticrr/Primpol/Chtf18/Polq/Mcm10/Cdc45/Rfc4/Ccne2/Fbxo5/Chek2/Rad51/Mgme1/Recql4/Cdc6/E2f7/Ccne1/Gen1/Mcm8/Gins1/Eme1/Cenps/Pole2/Dscc1/Orc1	65
GO:0044772	nuclear chromosome segregation	86/1197	256/23210	1.15455e-46	8.72837e-44	6.18767e-44	Rad21/Top2a/Smc1a/Smc3/Ncapd2/Cdk5rap2/Racgap1/Stag1/Smc4/Cenpf/Atm/Smc2/Slf2/Cep192/Ndc1/Ccnb1/Incenp/Tacc3/Nusap1/Ncapd3/Cenpc1/Knstrn/Cdc20/Nup62/Espl1/Cenpe/Spag5/Ect2/Ncaph/Kif22/Bub1b/Cdca8/Mre11a/Nuf2/Mad2l1/Kif23/Knl1/Kif18b/Plk1/Fen1/Kif2c/Aurkb/Anapc15/Bub1/Cenpq/Lrrk1/Birc5/Ncapg/Ddx11/Brca2/Cdt1/Sgo2a/Kif14/Dsn1/Ttk/Fancd2/Kif4/Nek2/Pttg1/Slf1/Psrc1/Ndc80/Fam83d/Kif18a/Ccne2/Esco2/Fbx…	86
GO:0000070	mitotic nuclear division	86/1197	256/23210	1.15455e-46	8.72837e-44	6.18767e-44	Flna/Rad21/Mki67/Smc1a/Bmp7/Smc3/Ncapd2/Cdk5rap2/Racgap1/Stag1/Lrp5/Smc4/Tpx2/Esr1/Atm/Kif11/Smc2/Slf2/Tgfb1/Cep192/Ccnb1/Incenp/Tacc3/Nusap1/Ncapd3/Cenpc1/Knstrn/Cdc20/Nup62/Espl1/Pdgfb/Ube2c/Cenpe/Spag5/Ctdp1/Ncaph/Kif22/Bub1b/Cdca8/Nuf2/Mad2l1/Kif23/Kif18b/Plk1/Kif2c/Aaas/Kifc1/Aurkb/Anapc15/Bub1/Birc5/Ncapg/Kif20b/Cdt1/Bora/Kif14/Dsn1/Ttk/Kif4/Nek2/Pttg1/Slf1/Mtbp/Psrc1/Aurka/Ndc80/Kifc5b/Kif…	86
GO:0006310	sister chromatid segregation	71/1197	178/23210	1.56942e-44	9.22821e-42	6.54202e-42	Rad21/Top2a/Smc1a/Smc3/Ncapd2/Cdk5rap2/Racgap1/Stag1/Smc4/Atm/Smc2/Slf2/Cep192/Ccnb1/Incenp/Tacc3/Nusap1/Ncapd3/Cenpc1/Knstrn/Cdc20/Nup62/Espl1/Cenpe/Spag5/Ncaph/Kif22/Bub1b/Cdca8/Mre11a/Nuf2/Mad2l1/Kif23/Kif18b/Plk1/Fen1/Kif2c/Aurkb/Anapc15/Bub1/Lrrk1/Birc5/Ncapg/Ddx11/Cdt1/Sgo2a/Kif14/Dsn1/Ttk/Kif4/Nek2/Pttg1/Slf1/Psrc1/Ndc80/Kif18a/Esco2/Fbxo5/Recql4/Sgo1/Cdc6/Nsl1/Gen1/Cdca5/Trip13/Rmi2/Cenpk…	71
GO:0045930	mitotic cell cycle phase transition	91/1197	355/23210	1.72618e-38	7.61247e-36	5.39659e-36	Ccnd1/Zfp36l2/Calm2/Rad21/Ccnd2/Lmnb1/Cdk5rap2/Nasp/Ccng1/Plk2/Topbp1/Ccna2/Ctc1/Cenpf/Atm/Tgfb1/Foxm1/Cep192/Usp37/Cdk2/Ccnb1/Tacc3/Nfatc1/Ccng2/Rfwd3/Ptpn6/Cdkn2c/Cdk1/Cdkn1a/Ube2c/Rbl1/Jade1/Pole/Cenpe/Crlf3/Ctdp1/Cdc25b/Bub1b/Iqgap3/Mre11a/Mad2l1/Plk1/Atad5/Larp7/Ccnb2/Skp2/Aurkb/Anapc15/Dact1/Bub1/Birc5/Rbbp8/Tcf19/Ccnf/Dbf4/Rpa2/Dtl/Cdt1/Clspn/Kif14/Blm/Ttk/Donson/Cdc25c/Ticrr/Mtbp/Mastl/Nd…	91
GO:0000075	mitotic sister chromatid segregation	59/1197	144/23210	5.68881e-38	2.31578e-35	1.64169e-35	Rad21/Smc1a/Ncapd2/Cdk5rap2/Racgap1/Smc4/Atm/Smc2/Slf2/Cep192/Ccnb1/Incenp/Tacc3/Nusap1/Ncapd3/Cenpc1/Knstrn/Cdc20/Nup62/Espl1/Cenpe/Spag5/Ncaph/Kif22/Bub1b/Cdca8/Nuf2/Mad2l1/Kif23/Kif18b/Plk1/Kif2c/Aurkb/Anapc15/Bub1/Birc5/Ncapg/Cdt1/Kif14/Dsn1/Ttk/Kif4/Nek2/Pttg1/Slf1/Psrc1/Ndc80/Kif18a/Fbxo5/Sgo1/Cdc6/Nsl1/Gen1/Cdca5/Trip13/Cenpk/Spdl1/Haspin/Dscc1	59
GO:0007093	DNA recombination	74/1197	280/23210	2.08924e-32	7.37085e-30	5.22531e-30	Nsd2/Nucks1/Top2a/Smchd1/Hmgb2/Topbp1/Mcm6/Rpa1/H2afx/Mcm5/Mcm2/Mcm7/Atm/Tgfb1/Mcm4/Lig1/Mcm3/Paxip1/Rnf168/Ptprc/Msh6/Rfwd3/Stat6/Recql/Mre11a/Rad50/Timeless/Atad5/Foxp1/Rbbp8/Spidr/Xrcc2/Brca2/Rpa2/Was/Tcf7/Mms22l/Blm/Tonsl/Uchl5/Icosl/Fignl1/Chtf18/Pif1/Polq/Rad54l/Rad18/Cdc45/Rad51ap1/Chek1/Rad51/Usp51/Ung/Exo1/Recql4/Gins2/Gen1/Mcm8/Trip13/Ankle1/Parpbp/Rad54b/Rmi2/Psmc3ip/Brip1/Rad51c/Cgas/…	74
GO:0010948	negative regulation of mitotic cell cycle	64/1197	233/23210	3.20323e-29	9.97146e-27	7.06892e-27	Btg2/Ccnd1/Zfp36l2/Rad21/Top2a/Bmp7/Cdk5rap2/Btg1/Ccng1/Plk2/Topbp1/Gas1/Esr1/Atm/Tgfb1/Cep192/Ccnb1/Rfwd3/Cdk1/Cdkn1a/Rbl1/Jade1/Cenpe/Bub1b/Mre11a/Mad2l1/Plk1/Tipin/Aurkb/Anapc15/Dact1/Bub1/Birc5/Kntc1/Wee1/Map3k20/Rpa2/Cdt1/Clspn/Zwilch/Blm/Ttk/Pttg1/Donson/Ticrr/Mtbp/Ndc80/Chek1/Fbxo5/Stil/Chek2/Pidd1/Cdc6/E2f7/Gen1/Trip13/Spdl1/Ddias/Eme1/Haspin/Btg3/Stk33/Orc1/Cdkn2b	64
GO:1901987	cell cycle checkpoint	56/1197	178/23210	4.69504e-29	1.38034e-26	9.78545e-27	Ccnd1/Top2a/Cdk5rap2/Mapk14/Ccng1/Plk2/Topbp1/Cdc5l/Atm/Tgfb1/Cep192/Ccnb1/Rfwd3/Cdk1/Cdkn1a/Cenpe/Bub1b/Mre11a/Mad2l1/Timeless/Plk1/Tipin/Aurkb/Anapc15/Bub1/Birc5/Kntc1/Wee1/Map3k20/Rpa2/Dtl/Cdt1/Clspn/Zwilch/Blm/Ttk/Dna2/Donson/Ticrr/Mtbp/Aurka/Wdr76/Ndc80/E2f1/Chek1/Stil/Chek2/Pidd1/Cdc6/Gen1/Trip13/Spdl1/Eme1/Stk33/Orc1/Cdkn2b	56
GO:1901990	mitotic cell cycle checkpoint	48/1197	130/23210	1.16608e-28	3.24784e-26	2.30244e-26	Ccnd1/Top2a/Cdk5rap2/Ccng1/Plk2/Topbp1/Atm/Tgfb1/Cep192/Ccnb1/Rfwd3/Cdk1/Cdkn1a/Cenpe/Bub1b/Mre11a/Mad2l1/Plk1/Tipin/Aurkb/Anapc15/Bub1/Birc5/Kntc1/Wee1/Map3k20/Rpa2/Cdt1/Clspn/Zwilch/Blm/Ttk/Donson/Ticrr/Mtbp/Ndc80/Chek1/Stil/Chek2/Pidd1/Cdc6/Gen1/Trip13/Spdl1/Eme1/Stk33/Orc1/Cdkn2b	48
GO:0051983	regulation of cell cycle phase transition	70/1197	289/23210	3.52798e-28	8.8905e-26	6.30261e-26	Ccnd1/Zfp36l2/Rad21/Ccnd2/Lmnb1/Cdk5rap2/Ccng1/Topbp1/Ctc1/Gas1/Cenpf/Atm/Tgfb1/Cep192/Paxip1/Cdk2/Ccnb1/Rfwd3/Ptpn6/Cdk1/Cdkn1a/Ube2c/Rbl1/Jade1/Cenpe/Cdc25b/Bub1b/Mre11a/Mad2l1/Plk1/Atad5/Larp7/Aurkb/Anapc15/Dact1/Bub1/Lrrk1/Birc5/Dbf4/Rpa2/Dtl/Cdt1/Clspn/Kif14/Blm/Ttk/Donson/Cdc25c/Ticrr/Mtbp/Ndc80/E2f1/Fam83d/Cdc45/Chek1/Fbxo5/Pidd1/Cdc6/E2f7/Ccne1/Gen1/Cdca5/Trip13/Tfap4/Rad51c/Spdl1/Haspin/…	70
GO:0007051	regulation of mitotic cell cycle phase transition	66/1197	258/23210	4.07238e-28	9.79592e-26	6.94448e-26	Ccnd1/Zfp36l2/Rad21/Ccnd2/Lmnb1/Cdk5rap2/Ccng1/Topbp1/Ctc1/Cenpf/Atm/Tgfb1/Cep192/Cdk2/Ccnb1/Rfwd3/Ptpn6/Cdk1/Cdkn1a/Ube2c/Rbl1/Jade1/Cenpe/Cdc25b/Bub1b/Mre11a/Mad2l1/Plk1/Atad5/Larp7/Aurkb/Anapc15/Dact1/Bub1/Birc5/Dbf4/Rpa2/Dtl/Cdt1/Clspn/Kif14/Blm/Ttk/Donson/Cdc25c/Ticrr/Mtbp/Ndc80/E2f1/Cdc45/Chek1/Fbxo5/Pidd1/Cdc6/E2f7/Ccne1/Gen1/Cdca5/Trip13/Tfap4/Rad51c/Spdl1/Haspin/Rad51b/Orc1/Cdkn2b	66
GO:0000725	regulation of chromosome segregation	41/1197	102/23210	2.25589e-26	5.1905e-24	3.67963e-24	Rad21/Mki67/Cdk5rap2/Racgap1/Atm/Slf2/Cep192/Ccnb1/Tacc3/Knstrn/Cenpe/Spag5/Ect2/Bub1b/Mad2l1/Plk1/Fen1/Kif2c/Aurkb/Anapc15/Bub1/Lrrk1/Birc5/Ddx11/Cdt1/Sgo2a/Ttk/Nek2/Pttg1/Slf1/Chtf18/Ndc80/Rad18/Fbxo5/Recql4/Cdc6/Gen1/Cdca5/Trip13/Rmi2/Spdl1	41
GO:0007088	spindle organization	51/1197	165/23210	3.63087e-26	8.00606e-24	5.67562e-24	Tubb5/Flna/Myh9/Smc1a/Smc3/Tacc1/Racgap1/Stag1/Plk2/Stmn1/Tpx2/Kif11/Aspm/Cep192/Ccnb1/Tacc3/Knstrn/Cdc20/Nup62/Espl1/Cenpe/Spag5/Nuf2/Kif23/Plk1/Aaas/Kifc1/Aurkb/Haus6/Birc5/Wdr62/Bora/Spc25/Kif4/Nek2/Psrc1/Cep72/Aurka/Haus8/Ndc80/Kifc5b/Cenpj/Mybl2/Fbxo5/Stil/Chek2/Haus3/Haus4/Ccsap/Cenpw/Aunip	51
GO:1903046	recombinational repair	45/1197	127/23210	4.57613e-26	9.31419e-24	6.60297e-24	Nucks1/Smchd1/Mcm6/Rpa1/H2afx/Mcm5/Mcm2/Mcm7/Atm/Mcm4/Mcm3/Rfwd3/Recql/Mre11a/Timeless/Rbbp8/Spidr/Xrcc2/Brca2/Rpa2/Was/Mms22l/Blm/Tonsl/Fignl1/Polq/Rad54l/Cdc45/Rad51ap1/Chek1/Rad51/Usp51/Recql4/Gins2/Gen1/Mcm8/Parpbp/Rad54b/Rmi2/Rad51c/Cgas/Tex15/Rad51b/Aunip/Radx	45
GO:0051321	regulation of mitotic nuclear division	48/1197	162/23210	8.39124e-24	1.64468e-21	1.16594e-21	Rad21/Mki67/Smc1a/Bmp7/Smc3/Cdk5rap2/Stag1/Lrp5/Esr1/Atm/Kif11/Slf2/Tgfb1/Cep192/Ccnb1/Tacc3/Nusap1/Nup62/Pdgfb/Ube2c/Cenpe/Bub1b/Mad2l1/Plk1/Aurkb/Anapc15/Bub1/Birc5/Kif20b/Cdt1/Bora/Ttk/Nek2/Pttg1/Slf1/Mtbp/Ndc80/Chek1/Fbxo5/Edn3/Cdc6/Ccsap/Gen1/Cdca5/Trip13/Met/Spdl1/Cd28	48
GO:1902850	meiotic cell cycle process	52/1197	198/23210	5.55344e-23	1.0496e-20	7.44078e-21	Myh9/Top2a/Ncapd2/Topbp1/Smc4/Atm/Smc2/Aspm/Ndc1/Ncapd3/Cenpc1/Msh6/Cdc20/Espl1/Mybl1/Ncaph/Cdc25b/Bub1b/Mre11a/Nuf2/Rad50/Plk1/Bub1/Lrrk1/Fanca/Brca2/Sgo2a/Ttk/Fancd2/Pttg1/Cdc25c/Fignl1/Aurka/Chtf18/Mastl/Rad54l/Kif18a/Ccne2/Fbxo5/Cks2/Rad51/Sgo1/Ccne1/Syce2/Trip13/Rad54b/Psmc3ip/Brip1/Rad51c/Eme1/Cenps/Tex15	52
GO:0051783	meiotic cell cycle	66/1197	314/23210	6.26681e-23	1.14358e-20	8.10704e-21	Myh9/Rad21/Mki67/Top2a/Smc1a/Smc3/Ncapd2/Sun2/Topbp1/Rpa1/H2afx/Smc4/Atm/Smc2/Aspm/Ndc1/Cdk2/Ncapd3/Cenpc1/Msh6/Cdc20/Espl1/Mybl1/Ncaph/Cdc25b/Bub1b/Mre11a/Nuf2/Rad50/Plk1/Bub1/Lrrk1/Rbbp8/Fanca/Brca2/Sgo2a/Pkmyt1/Mns1/Ttk/Fancd2/Nek2/Pttg1/Cdc25c/Fignl1/Aurka/Chtf18/Mastl/Rad54l/Kif18a/Ccne2/Fbxo5/Cks2/Rad51/Exo1/Sgo1/Ccne1/Syce2/Trip13/Rad54b/Psmc3ip/Brip1/Rad51c/Eme1/Cenps/Tex15/Ccna1	66
GO:1901988	microtubule cytoskeleton organization involved in mitosis	42/1197	130/23210	1.28085e-22	2.25942e-20	1.60174e-20	Flna/Spry1/Smc1a/Smc3/Cdk5rap2/Tacc1/Racgap1/Stag1/Plk2/Stmn1/Tpx2/Kif11/Cep192/Ccnb1/Tacc3/Nusap1/Cdc20/Nup62/Cenpa/Cenpe/Nuf2/Mad2l1/Kif23/Plk1/Aaas/Kifc1/Aurkb/Birc5/Wdr62/Bora/Spc25/Kif4/Nek2/Psrc1/Aurka/Ndc80/Kifc5b/Mybl2/Stil/Chek2/Ccsap/Spdl1	42
GO:0045787	regulation of nuclear division	51/1197	194/23210	1.38193e-22	2.35908e-20	1.67239e-20	Rad21/Mki67/Smc1a/Bmp7/Smc3/Cdk5rap2/Stag1/Lrp5/Esr1/Atm/Kif11/Slf2/Tgfb1/Cep192/Ccnb1/Tacc3/Nusap1/Cdc20/Nup62/Pdgfb/Ube2c/Cenpe/Bub1b/Mad2l1/Plk1/Aurkb/Anapc15/Bub1/Lrrk1/Birc5/Kif20b/Cdt1/Bora/Sgo2a/Ttk/Nek2/Pttg1/Slf1/Mtbp/Ndc80/Chek1/Fbxo5/Edn3/Cdc6/Ccsap/Gen1/Cdca5/Trip13/Met/Spdl1/Cd28	51
GO:1901991	negative regulation of cell cycle phase transition	46/1197	158/23210	1.64013e-22	2.71236e-20	1.92283e-20	Ccnd1/Zfp36l2/Rad21/Cdk5rap2/Ccng1/Topbp1/Gas1/Atm/Cep192/Ccnb1/Rfwd3/Cdk1/Cdkn1a/Rbl1/Jade1/Cenpe/Bub1b/Mre11a/Mad2l1/Plk1/Aurkb/Anapc15/Dact1/Bub1/Lrrk1/Birc5/Rpa2/Dtl/Cdt1/Clspn/Blm/Ttk/Donson/Ticrr/Ndc80/Chek1/Fbxo5/Pidd1/Cdc6/E2f7/Gen1/Trip13/Spdl1/Haspin/Orc1/Cdkn2b	46
GO:0090068	positive regulation of cell cycle	69/1197	349/23210	2.56329e-22	4.11058e-20	2.91405e-20	Lgmn/Ccnd1/Rad21/Ccnd2/Rock2/Lmnb1/Dab2ip/Racgap1/Lrp5/Slf2/Tgfb1/Ccnb1/Nusap1/Cdk1/Hes1/Nup62/Cdkn1a/Pdgfb/Ube2c/Cenpe/Crlf3/Spag5/Ect2/Cdc25b/Mad2l1/Kif23/Atad5/Fen1/Larp7/Aurkb/Birc5/Plk4/Ddx11/Kif20b/Dbf4/Brca2/Dtl/Cdt1/Sgo2a/Cast/Bcl2l11/Kif14/Tal1/Cdc25c/Slf1/Mtbp/Psrc1/Aurka/Ndc80/Cenpj/Fam83d/Cdc45/Chek1/Fbxo5/Stil/Chek2/Pidd1/Edn3/Cdc6/E2f7/Ccne1/Gen1/Cdca5/Tfap4/Met/Rad51c/Rad51b/Orc1/C…	69
GO:0044786	negative regulation of mitotic cell cycle phase transition	43/1197	141/23210	5.20872e-22	8.10723e-20	5.74734e-20	Ccnd1/Zfp36l2/Rad21/Cdk5rap2/Ccng1/Topbp1/Atm/Cep192/Ccnb1/Rfwd3/Cdk1/Cdkn1a/Rbl1/Jade1/Cenpe/Bub1b/Mre11a/Mad2l1/Plk1/Aurkb/Anapc15/Dact1/Bub1/Birc5/Rpa2/Cdt1/Clspn/Blm/Ttk/Donson/Ticrr/Ndc80/Chek1/Fbxo5/Pidd1/Cdc6/E2f7/Gen1/Trip13/Spdl1/Haspin/Orc1/Cdkn2b	43
GO:0140013	cell cycle DNA replication	26/1197	48/23210	2.35234e-21	3.45793e-19	2.45138e-19	Smc1a/Smc3/Pcna/Mcm6/Mcm5/Mcm2/Mcm7/Mcm4/Lig1/Mcm3/Msh6/Slbp/Mre11a/Atad5/Pola1/Dbf4/Brca2/Cdt1/Dna2/Donson/Cdc45/Fbxo5/Chek2/Rad51/E2f7/Gins1	26
GO:0033045	meiotic nuclear division	47/1197	179/23210	6.80339e-21	9.73069e-19	6.89823e-19	Top2a/Topbp1/Smc4/Atm/Smc2/Aspm/Ndc1/Ncapd3/Cenpc1/Cdc20/Espl1/Mybl1/Ncaph/Cdc25b/Bub1b/Mre11a/Nuf2/Plk1/Bub1/Lrrk1/Fanca/Brca2/Sgo2a/Ttk/Fancd2/Pttg1/Fignl1/Aurka/Chtf18/Mastl/Rad54l/Kif18a/Ccne2/Fbxo5/Cks2/Rad51/Sgo1/Ccne1/Syce2/Trip13/Rad54b/Psmc3ip/Brip1/Rad51c/Eme1/Cenps/Tex15	47
GO:0007052	regulation of sister chromatid segregation	32/1197	81/23210	1.32109e-20	1.83979e-18	1.30426e-18	Rad21/Cdk5rap2/Atm/Slf2/Cep192/Ccnb1/Tacc3/Cenpe/Bub1b/Mad2l1/Plk1/Fen1/Aurkb/Anapc15/Bub1/Lrrk1/Birc5/Ddx11/Cdt1/Sgo2a/Ttk/Pttg1/Slf1/Ndc80/Fbxo5/Recql4/Cdc6/Gen1/Cdca5/Trip13/Rmi2/Spdl1	32
GO:0044839	mitotic spindle organization	36/1197	105/23210	1.44719e-20	1.96373e-18	1.39212e-18	Flna/Smc1a/Smc3/Tacc1/Racgap1/Stag1/Plk2/Stmn1/Tpx2/Kif11/Cep192/Ccnb1/Tacc3/Cdc20/Nup62/Cenpe/Nuf2/Kif23/Plk1/Aaas/Kifc1/Aurkb/Birc5/Wdr62/Bora/Spc25/Kif4/Nek2/Psrc1/Aurka/Ndc80/Kifc5b/Mybl2/Stil/Chek2/Ccsap	36
GO:0051985	cell cycle G2/M phase transition	38/1197	127/23210	2.74417e-19	3.54199e-17	2.51097e-17	Ccnd1/Calm2/Rad21/Lmnb1/Ccng1/Topbp1/Ccna2/Ctc1/Cenpf/Atm/Foxm1/Paxip1/Cdk2/Ccnb1/Cdk1/Cdkn1a/Cdc25b/Mre11a/Plk1/Atad5/Skp2/Birc5/Dtl/Clspn/Kif14/Blm/Donson/Cdc25c/Ticrr/Mastl/Chek1/Fbxo5/Chek2/Cdc6/Rad51c/Rad51b/Orc1/Cdkn2b	38
GO:0051052	negative regulation of chromosome segregation	24/1197	48/23210	9.82327e-19	1.23773e-16	8.77447e-17	Rad21/Cdk5rap2/Atm/Cep192/Ccnb1/Cenpe/Bub1b/Mad2l1/Plk1/Aurkb/Anapc15/Bub1/Lrrk1/Birc5/Cdt1/Ttk/Pttg1/Chtf18/Ndc80/Fbxo5/Recql4/Gen1/Trip13/Spdl1	24
GO:0045839	regulation of DNA metabolic process	65/1197	366/23210	1.50704e-18	1.85471e-16	1.31483e-16	Nsd2/Hnrnpd/Dnmt1/Nucks1/Dek/Igfbp3/Smchd1/Pcna/Ctc1/Dcp2/Atm/Slf2/Tgfb1/Usp1/Foxm1/Paxip1/Rfc2/Cdk2/Rnf168/Ptprc/Spi1/Msh6/Stat6/Cdkn1a/Apaf1/Pdgfb/Rnf169/Mre11a/Rad50/Timeless/Tinf2/Atad5/Aurkb/Ddx11/Spidr/Rfc3/Rfc5/Rpa2/Cdt1/Was/Cyp1b1/Blm/Nek2/Fignl1/Slf1/Ticrr/Chtf18/Pif1/Polq/Mis18a/Rad18/Rad51ap1/Rfc4/Chek1/Rad51/Usp51/Ankle1/Parpbp/Rmi2/Cgas/Tex15/Dscc1/Aunip/Radx/Cd28	65
GO:0006275	negative regulation of mitotic nuclear division	25/1197	54/23210	2.0203e-18	2.42987e-16	1.72257e-16	Rad21/Bmp7/Cdk5rap2/Esr1/Atm/Cep192/Ccnb1/Cenpe/Bub1b/Mad2l1/Plk1/Aurkb/Anapc15/Bub1/Birc5/Cdt1/Ttk/Pttg1/Mtbp/Ndc80/Chek1/Fbxo5/Gen1/Trip13/Spdl1	25
GO:1905819	regulation of DNA replication	34/1197	107/23210	2.57777e-18	3.03146e-16	2.14905e-16	Jun/Nucks1/Smc1a/Smc3/Pcna/Ccna2/Ctc1/Usp37/Rfc2/Cdk2/Msh6/Cdk1/Mre11a/Timeless/Atad5/Tipin/Rfc3/Rfc5/Dbf4/Brca2/Cdt1/Blm/Dna2/Donson/Ticrr/Chtf18/Rfc4/Esco2/Fbxo5/Chek2/E2f7/Gmnn/Met/Dscc1	34
GO:0051304	negative regulation of chromosome separation	22/1197	42/23210	7.45946e-18	8.58162e-16	6.08364e-16	Rad21/Cdk5rap2/Atm/Cep192/Ccnb1/Cenpe/Bub1b/Mad2l1/Plk1/Aurkb/Anapc15/Bub1/Lrrk1/Birc5/Cdt1/Ttk/Pttg1/Ndc80/Fbxo5/Gen1/Trip13/Spdl1	22
GO:2000816	chromosome separation	31/1197	93/23210	1.69483e-17	1.9083e-15	1.35282e-15	Rad21/Top2a/Ncapd2/Cdk5rap2/Atm/Cep192/Ccnb1/Tacc3/Ncapd3/Espl1/Cenpe/Ncaph/Bub1b/Mad2l1/Plk1/Aurkb/Anapc15/Bub1/Lrrk1/Birc5/Cdt1/Ttk/Pttg1/Ndc80/Fbxo5/Cdc6/Gen1/Trip13/Spdl1/Eme1/Cenps	31
GO:0033046	negative regulation of mitotic sister chromatid separation	21/1197	40/23210	3.95474e-17	4.3601e-15	3.09094e-15	Rad21/Cdk5rap2/Atm/Cep192/Ccnb1/Cenpe/Bub1b/Mad2l1/Plk1/Aurkb/Anapc15/Bub1/Birc5/Cdt1/Ttk/Pttg1/Ndc80/Fbxo5/Gen1/Trip13/Spdl1	21
GO:0051784	negative regulation of sister chromatid segregation	22/1197	45/23210	5.15017e-17	5.56218e-15	3.94312e-15	Rad21/Cdk5rap2/Atm/Cep192/Ccnb1/Cenpe/Bub1b/Mad2l1/Plk1/Aurkb/Anapc15/Bub1/Birc5/Cdt1/Ttk/Pttg1/Ndc80/Fbxo5/Recql4/Gen1/Trip13/Spdl1	22
GO:0031577	negative regulation of nuclear division	26/1197	66/23210	5.79706e-17	6.1356e-15	4.34962e-15	Rad21/Bmp7/Cdk5rap2/Esr1/Atm/Cep192/Ccnb1/Cenpe/Bub1b/Mad2l1/Plk1/Aurkb/Anapc15/Bub1/Lrrk1/Birc5/Cdt1/Ttk/Pttg1/Mtbp/Ndc80/Chek1/Fbxo5/Gen1/Trip13/Spdl1	26
GO:1902100	spindle checkpoint	21/1197	41/23210	7.71527e-17	7.85177e-15	5.56624e-15	Cdk5rap2/Atm/Cep192/Ccnb1/Cenpe/Bub1b/Mad2l1/Plk1/Aurkb/Anapc15/Bub1/Birc5/Cdt1/Ttk/Mtbp/Aurka/Ndc80/Stil/Gen1/Trip13/Spdl1	21
GO:0033260	negative regulation of metaphase/anaphase transition of cell cycle	21/1197	41/23210	7.71527e-17	7.85177e-15	5.56624e-15	Rad21/Cdk5rap2/Atm/Cep192/Ccnb1/Cenpe/Bub1b/Mad2l1/Plk1/Aurkb/Anapc15/Bub1/Lrrk1/Birc5/Cdt1/Ttk/Ndc80/Fbxo5/Gen1/Trip13/Spdl1	21
GO:0006270	nuclear DNA replication	20/1197	37/23210	1.04377e-16	1.0422e-14	7.3883e-15	Pcna/Mcm6/Mcm5/Mcm2/Mcm7/Mcm4/Lig1/Mcm3/Slbp/Atad5/Pola1/Dbf4/Brca2/Cdt1/Dna2/Donson/Cdc45/Chek2/Rad51/Gins1	20
GO:0045005	DNA replication initiation	18/1197	29/23210	1.18573e-16	1.16202e-14	8.23771e-15	Mcm6/Mcm5/Mcm2/Mcm7/Mcm4/Mcm3/Cdk2/Pola2/Pola1/Cdt1/Ticrr/Mcm10/Cdc45/Ccne2/Cdc6/Ccne1/Mcm8/Orc1	18
GO:0007098	DNA-dependent DNA replication maintenance of fidelity	20/1197	38/23210	2.09715e-16	2.01784e-14	1.43048e-14	Nucks1/Pcna/Rfwd3/Pold1/Pole/Mre11a/Timeless/Tipin/Ddx11/Brca2/Mms22l/Blm/Tonsl/Dna2/Donson/Primpol/Rad51/Gen1/Eme1/Cenps	20
GO:0033048	centrosome cycle	34/1197	122/23210	2.3643e-16	2.23426e-14	1.5839e-14	Xpo1/Rock2/Cdk5rap2/Plk2/Bnip2/Kif11/Cep192/Cdk2/Cntln/Nup62/Pclaf/Plk1/Kifc1/Haus6/Cep135/Plk4/Ccnf/Xrcc2/Brca2/Wdr62/Mdm1/Cep152/Sass6/Nek2/Cep72/Aurka/Haus8/Cenpj/Chek1/Stil/Haus3/Haus4/Sgo1/Gen1	34
GO:0061982	negative regulation of mitotic sister chromatid segregation	21/1197	43/23210	2.73143e-16	2.53592e-14	1.79775e-14	Rad21/Cdk5rap2/Atm/Cep192/Ccnb1/Cenpe/Bub1b/Mad2l1/Plk1/Aurkb/Anapc15/Bub1/Birc5/Cdt1/Ttk/Pttg1/Ndc80/Fbxo5/Gen1/Trip13/Spdl1	21
GO:0051225	meiosis I cell cycle process	33/1197	116/23210	3.32137e-16	2.9834e-14	2.11498e-14	Top2a/Topbp1/Atm/Ndc1/Cenpc1/Msh6/Espl1/Mybl1/Cdc25b/Mre11a/Plk1/Brca2/Sgo2a/Fancd2/Pttg1/Cdc25c/Aurka/Chtf18/Rad54l/Ccne2/Fbxo5/Cks2/Rad51/Ccne1/Syce2/Trip13/Rad54b/Psmc3ip/Brip1/Rad51c/Eme1/Cenps/Tex15	33
GO:0045841	spindle assembly	31/1197	102/23210	3.32616e-16	2.9834e-14	2.11498e-14	Tubb5/Flna/Smc1a/Smc3/Racgap1/Stag1/Tpx2/Kif11/Aspm/Cep192/Cdc20/Spag5/Kif23/Plk1/Aaas/Kifc1/Aurkb/Haus6/Birc5/Kif4/Nek2/Aurka/Haus8/Kifc5b/Mybl2/Fbxo5/Chek2/Haus3/Haus4/Ccsap/Cenpw	31
GO:0071174	negative regulation of mitotic metaphase/anaphase transition	20/1197	39/23210	4.0969e-16	3.55422e-14	2.51964e-14	Rad21/Cdk5rap2/Atm/Cep192/Ccnb1/Cenpe/Bub1b/Mad2l1/Plk1/Aurkb/Anapc15/Bub1/Birc5/Cdt1/Ttk/Ndc80/Fbxo5/Gen1/Trip13/Spdl1	20
GO:0045132	mitotic spindle checkpoint	20/1197	39/23210	4.0969e-16	3.55422e-14	2.51964e-14	Cdk5rap2/Atm/Cep192/Ccnb1/Cenpe/Bub1b/Mad2l1/Plk1/Aurkb/Anapc15/Bub1/Birc5/Cdt1/Ttk/Mtbp/Ndc80/Stil/Gen1/Trip13/Spdl1	20
GO:0031570	meiotic chromosome segregation	30/1197	97/23210	5.84119e-16	4.98574e-14	3.53446e-14	Top2a/Smc4/Atm/Smc2/Ndc1/Ncapd3/Cenpc1/Espl1/Ncaph/Bub1b/Mre11a/Nuf2/Plk1/Bub1/Lrrk1/Brca2/Sgo2a/Ttk/Fancd2/Pttg1/Ccne2/Sgo1/Ccne1/Syce2/Trip13/Brip1/Rad51c/Eme1/Cenps/Tex15	30
GO:0045931	positive regulation of mitotic cell cycle	39/1197	166/23210	8.62934e-16	7.05382e-14	5.00056e-14	Lgmn/Ccnd1/Ccnd2/Lmnb1/Lrp5/Slf2/Tgfb1/Ccnb1/Nusap1/Cdk1/Hes1/Nup62/Pdgfb/Ube2c/Cenpe/Cdc25b/Mad2l1/Larp7/Birc5/Kif20b/Dbf4/Brca2/Dtl/Cdt1/Tal1/Cdc25c/Slf1/Mtbp/Ndc80/Cdc45/Fbxo5/Edn3/Ccne1/Gen1/Cdca5/Met/Rad51c/Rad51b/Cd28	39
GO:0090329	regulation of DNA-dependent DNA replication	22/1197	50/23210	8.66399e-16	7.05382e-14	5.00056e-14	Smc1a/Smc3/Rfc2/Cdk2/Msh6/Mre11a/Timeless/Tipin/Rfc3/Rfc5/Dbf4/Brca2/Cdt1/Blm/Donson/Ticrr/Chtf18/Rfc4/Fbxo5/Chek2/E2f7/Dscc1	22
GO:0033047	regulation of mitotic sister chromatid segregation	25/1197	67/23210	1.05194e-15	8.43466e-14	5.97946e-14	Rad21/Cdk5rap2/Atm/Slf2/Cep192/Ccnb1/Tacc3/Cenpe/Bub1b/Mad2l1/Plk1/Aurkb/Anapc15/Bub1/Birc5/Cdt1/Ttk/Pttg1/Slf1/Ndc80/Fbxo5/Cdc6/Gen1/Trip13/Spdl1	25
GO:0010965	regulation of mitotic sister chromatid separation	23/1197	56/23210	1.22023e-15	9.638e-14	6.83253e-14	Rad21/Cdk5rap2/Atm/Cep192/Ccnb1/Tacc3/Cenpe/Bub1b/Mad2l1/Plk1/Aurkb/Anapc15/Bub1/Birc5/Cdt1/Ttk/Pttg1/Ndc80/Fbxo5/Cdc6/Gen1/Trip13/Spdl1	23
GO:1905818	regulation of chromosome separation	24/1197	62/23210	1.47283e-15	1.14621e-13	8.12563e-14	Rad21/Cdk5rap2/Atm/Cep192/Ccnb1/Tacc3/Cenpe/Bub1b/Mad2l1/Plk1/Aurkb/Anapc15/Bub1/Lrrk1/Birc5/Cdt1/Ttk/Pttg1/Ndc80/Fbxo5/Cdc6/Gen1/Trip13/Spdl1	24
GO:1902749	regulation of cell cycle G2/M phase transition	29/1197	94/23210	1.9236e-15	1.46817e-13	1.04081e-13	Ccnd1/Rad21/Lmnb1/Ccng1/Topbp1/Ctc1/Cenpf/Atm/Paxip1/Cdk2/Ccnb1/Cdk1/Cdc25b/Mre11a/Plk1/Atad5/Dtl/Clspn/Kif14/Blm/Donson/Cdc25c/Ticrr/Chek1/Fbxo5/Cdc6/Rad51c/Rad51b/Orc1	29
GO:0031023	microtubule organizing center organization	34/1197	130/23210	1.94203e-15	1.46817e-13	1.04081e-13	Xpo1/Rock2/Cdk5rap2/Plk2/Bnip2/Kif11/Cep192/Cdk2/Cntln/Nup62/Pclaf/Plk1/Kifc1/Haus6/Cep135/Plk4/Ccnf/Xrcc2/Brca2/Wdr62/Mdm1/Cep152/Sass6/Nek2/Cep72/Aurka/Haus8/Cenpj/Chek1/Stil/Haus3/Haus4/Sgo1/Gen1	34
GO:0044784	metaphase/anaphase transition of cell cycle	23/1197	58/23210	3.06955e-15	2.28789e-13	1.62192e-13	Rad21/Cdk5rap2/Atm/Cep192/Ccnb1/Tacc3/Cenpe/Bub1b/Mad2l1/Plk1/Aurkb/Anapc15/Bub1/Lrrk1/Birc5/Cdt1/Ttk/Ndc80/Fbxo5/Cdc6/Gen1/Trip13/Spdl1	23
GO:0010212	response to ionizing radiation	33/1197	125/23210	3.72959e-15	2.74125e-13	1.94331e-13	Egr1/Rhob/Ccnd2/Nucks1/Mapk14/Topbp1/H2afx/Atm/Rnf168/Ptprc/Tmem109/Rfwd3/Cdkn1a/Ect2/Aen/Spidr/Map3k20/Xrcc2/Brca2/Blm/Fancd2/Sfrp2/Fignl1/Ticrr/Bbc3/Rad54l/Apobec1/Rad51ap1/Chek2/Rad51/Pmaip1/Rad54b/Ddias	33
GO:0007127	meiosis I	31/1197	111/23210	4.62531e-15	3.33457e-13	2.36393e-13	Top2a/Topbp1/Atm/Ndc1/Cenpc1/Espl1/Mybl1/Cdc25b/Mre11a/Plk1/Brca2/Sgo2a/Fancd2/Pttg1/Aurka/Chtf18/Rad54l/Ccne2/Fbxo5/Cks2/Rad51/Ccne1/Syce2/Trip13/Rad54b/Psmc3ip/Brip1/Rad51c/Eme1/Cenps/Tex15	31
GO:0033044	regulation of chromosome organization	58/1197	354/23210	4.66286e-15	3.33457e-13	2.36393e-13	H3f3b/Rad21/Mki67/Hnrnpd/Dnmt1/Top2a/Cdk5rap2/Fmr1/Ctc1/Mcm2/Dcp2/Atm/Slf2/Tgfb1/Cep192/Paxip1/Ccnb1/Tacc3/Spi1/Gtf2h2/Atad2/Cenpe/Resf1/Bub1b/Mre11a/Mad2l1/Rad50/Wdhd1/Tinf2/Plk1/Fen1/Aurkb/Anapc15/Bub1/Phf19/Lrrk1/Birc5/Ddx11/Cdt1/Sgo2a/Tal1/Ttk/Nek2/Pttg1/Slf1/Pif1/Ndc80/Apobec1/Cdc45/Chek1/Fbxo5/Recql4/Cdc6/Gen1/Cdca5/Trip13/Rmi2/Spdl1	58
GO:1902099	regulation of metaphase/anaphase transition of cell cycle	22/1197	54/23210	6.24857e-15	4.40899e-13	3.1256e-13	Rad21/Cdk5rap2/Atm/Cep192/Ccnb1/Cenpe/Bub1b/Mad2l1/Plk1/Aurkb/Anapc15/Bub1/Lrrk1/Birc5/Cdt1/Ttk/Ndc80/Fbxo5/Cdc6/Gen1/Trip13/Spdl1	22
GO:0010389	regulation of G2/M transition of mitotic cell cycle	26/1197	78/23210	6.7129e-15	4.6743e-13	3.31368e-13	Ccnd1/Rad21/Lmnb1/Ccng1/Topbp1/Ctc1/Cenpf/Atm/Cdk2/Ccnb1/Cdk1/Cdc25b/Mre11a/Dtl/Clspn/Kif14/Blm/Donson/Cdc25c/Ticrr/Chek1/Fbxo5/Cdc6/Rad51c/Rad51b/Orc1	26
GO:0051306	mitotic sister chromatid separation	23/1197	60/23210	7.38679e-15	5.07674e-13	3.59898e-13	Rad21/Cdk5rap2/Atm/Cep192/Ccnb1/Tacc3/Cenpe/Bub1b/Mad2l1/Plk1/Aurkb/Anapc15/Bub1/Birc5/Cdt1/Ttk/Pttg1/Ndc80/Fbxo5/Cdc6/Gen1/Trip13/Spdl1	23
GO:0007091	metaphase/anaphase transition of mitotic cell cycle	22/1197	55/23210	9.9105e-15	6.63878e-13	4.70633e-13	Rad21/Cdk5rap2/Atm/Cep192/Ccnb1/Tacc3/Cenpe/Bub1b/Mad2l1/Plk1/Aurkb/Anapc15/Bub1/Birc5/Cdt1/Ttk/Ndc80/Fbxo5/Cdc6/Gen1/Trip13/Spdl1	22
GO:2000779	regulation of double-strand break repair	25/1197	73/23210	1.08277e-14	7.16252e-13	5.07762e-13	Nsd2/Dek/Smchd1/Slf2/Foxm1/Rnf169/Timeless/Ddx11/Spidr/Rpa2/Was/Blm/Fignl1/Slf1/Polq/Rad51ap1/Chek1/Rad51/Usp51/Parpbp/Rmi2/Cgas/Tex15/Aunip/Radx	25
GO:0070661	leukocyte proliferation	55/1197	331/23210	1.30228e-14	8.50821e-13	6.0316e-13	Csf1r/Vsir/Msn/Vcam1/Nckap1l/Slc39a10/Tgfbr2/Inpp5d/Lyn/Mef2c/Il6ra/Atm/Tgfb1/Dock8/Dock2/Tnfrsf1b/Ptprc/Syk/Itgam/Ptpn6/Hes1/Cdkn1a/Cd180/Plcl2/Itgb2/Rac2/Hprt/Efnb1/Cd86/Ccdc88b/Atad5/Hells/Elf4/Malt1/Blm/Sash3/Gpr183/Tnfrsf13b/Icosl/Tlr9/Btk/Hhex/Ripk2/Enpp3/Ceacam1/Il7r/Ccr2/Slamf6/Cd79a/Btnl2/Ikzf3/Cd28/Spta1/Btla/Gapt	55
GO:0007062	sister chromatid cohesion	22/1197	56/23210	1.55336e-14	1.00249e-12	7.10678e-13	Rad21/Smc1a/Smc3/Stag1/Slf2/Cdc20/Kif22/Bub1b/Mre11a/Fen1/Bub1/Ddx11/Sgo2a/Pttg1/Slf1/Esco2/Recql4/Sgo1/Cdca5/Rad51c/Haspin/Dscc1	22
GO:0030071	regulation of mitotic metaphase/anaphase transition	21/1197	51/23210	1.99947e-14	1.27484e-12	9.03755e-13	Rad21/Cdk5rap2/Atm/Cep192/Ccnb1/Cenpe/Bub1b/Mad2l1/Plk1/Aurkb/Anapc15/Bub1/Birc5/Cdt1/Ttk/Ndc80/Fbxo5/Cdc6/Gen1/Trip13/Spdl1	21
GO:0030099	myeloid cell differentiation	61/1197	401/23210	2.96654e-14	1.86892e-12	1.32491e-12	Fos/Csf1r/Zfp36/Jun/Epas1/Junb/Myh9/Trf/Nfkbia/Wasf2/Nckap1l/Sp1/Ptbp3/Sp3/Tgfbr2/Inpp5d/Mapk14/Sh3pxd2a/Pip4k2a/Hmgb2/Lyn/Zfp385a/Mef2c/Trib1/Sh2b3/Arid4a/Ets1/Lbr/Tgfb1/Jag1/Lmo2/Tmem64/Rcor1/Spi1/Ikzf1/Nfatc1/Cdk6/Itgam/Ptpn6/Ncapg2/Hcls1/Ubash3b/Pknox1/Klf10/Inpp4b/Fli1/Casp8/Lrrk1/Tal1/Gpr183/Tnfrsf11a/Lyar/Cbfa2t3/Hhex/Relb/Epha2/Ceacam1/Itgb3/Clec5a/Irf4/Efna4	61
GO:0046651	lymphocyte proliferation	52/1197	308/23210	3.57599e-14	2.22637e-12	1.57831e-12	Vsir/Msn/Vcam1/Nckap1l/Slc39a10/Tgfbr2/Inpp5d/Lyn/Mef2c/Il6ra/Atm/Tgfb1/Dock8/Dock2/Tnfrsf1b/Ptprc/Syk/Itgam/Ptpn6/Hes1/Cdkn1a/Cd180/Plcl2/Itgb2/Rac2/Hprt/Efnb1/Cd86/Ccdc88b/Atad5/Hells/Elf4/Malt1/Blm/Sash3/Gpr183/Tnfrsf13b/Icosl/Tlr9/Btk/Ripk2/Ceacam1/Il7r/Ccr2/Slamf6/Cd79a/Btnl2/Ikzf3/Cd28/Spta1/Btla/Gapt	52
GO:0034508	centromere complex assembly	16/1197	28/23210	3.84299e-14	2.36478e-12	1.67643e-12	H3f3b/Hjurp/Nasp/Cenpc1/Cenpa/Cenpe/Hells/Mis18a/Cenpi/Cenpn/Cenpk/Cenph/Oip5/Cenps/Cenpw/Cenpp	16
GO:0007094	mitotic spindle assembly checkpoint	18/1197	37/23210	4.08338e-14	2.4556e-12	1.74081e-12	Cdk5rap2/Atm/Cep192/Ccnb1/Cenpe/Bub1b/Mad2l1/Plk1/Aurkb/Anapc15/Bub1/Birc5/Cdt1/Ttk/Ndc80/Gen1/Trip13/Spdl1	18
GO:0071173	spindle assembly checkpoint	18/1197	37/23210	4.08338e-14	2.4556e-12	1.74081e-12	Cdk5rap2/Atm/Cep192/Ccnb1/Cenpe/Bub1b/Mad2l1/Plk1/Aurkb/Anapc15/Bub1/Birc5/Cdt1/Ttk/Ndc80/Gen1/Trip13/Spdl1	18
GO:0032943	mononuclear cell proliferation	52/1197	310/23210	4.6748e-14	2.77041e-12	1.96399e-12	Vsir/Msn/Vcam1/Nckap1l/Slc39a10/Tgfbr2/Inpp5d/Lyn/Mef2c/Il6ra/Atm/Tgfb1/Dock8/Dock2/Tnfrsf1b/Ptprc/Syk/Itgam/Ptpn6/Hes1/Cdkn1a/Cd180/Plcl2/Itgb2/Rac2/Hprt/Efnb1/Cd86/Ccdc88b/Atad5/Hells/Elf4/Malt1/Blm/Sash3/Gpr183/Tnfrsf13b/Icosl/Tlr9/Btk/Ripk2/Ceacam1/Il7r/Ccr2/Slamf6/Cd79a/Btnl2/Ikzf3/Cd28/Spta1/Btla/Gapt	52
GO:0071900	regulation of protein serine/threonine kinase activity	63/1197	427/23210	4.71159e-14	2.77041e-12	1.96399e-12	Actb/Csf1r/Ccnd1/Trf/Tgfbr1/Ccnd2/Akap13/Dusp6/Spry1/Bmp7/Grm5/Dab2ip/Iqgap1/Pmp22/Lrp5/Lyn/Ccng1/Trib1/Ccna2/Sh2b3/Rgs2/Heg1/Tgfb1/Tiam1/Ccnb1/Ptprc/Syk/Ccng2/Pik3cg/Magi3/Ptpn6/Cdkn2c/Nup62/Cdkn1a/Pdgfb/Sesn2/Iqgap3/Plk1/Ccnb2/Ccnf/Map3k20/Blm/Tnfrsf11a/Pik3r5/Mdfic/Sfrp2/Tlr9/Psrc1/Hhex/Ccne2/Stil/Ripk2/Ret/Edn3/Cdc6/Ccne1/Ceacam1/Tfap4/Met/Map4k1/Lpar2/Cdkn2b/Ccna1	63
GO:2001251	negative regulation of chromosome organization	34/1197	144/23210	5.17245e-14	3.00798e-12	2.1324e-12	H3f3b/Rad21/Dnmt1/Top2a/Cdk5rap2/Ctc1/Mcm2/Dcp2/Atm/Cep192/Ccnb1/Spi1/Atad2/Cenpe/Bub1b/Mad2l1/Rad50/Tinf2/Plk1/Aurkb/Anapc15/Bub1/Birc5/Cdt1/Ttk/Pttg1/Pif1/Ndc80/Apobec1/Fbxo5/Recql4/Gen1/Trip13/Spdl1	34
GO:0034502	protein localization to chromosome	26/1197	85/23210	6.85577e-14	3.94356e-12	2.79565e-12	Rad21/Rpa1/Esr1/Slf2/Cdk1/Cenpa/Bub1b/Knl1/Tinf2/Plk1/Aurkb/Cenpq/Spidr/Brca2/Rpa2/Cdt1/Ttk/Slf1/Mtbp/Ndc80/Esco2/Cdca5/Mcm8/Spdl1/Haspin/Tex15	26
GO:0000018	regulation of DNA recombination	28/1197	103/23210	2.0387e-13	1.14774e-11	8.13654e-12	Nsd2/Smchd1/Tgfb1/Paxip1/Ptprc/Msh6/Stat6/Rad50/Timeless/Atad5/Spidr/Rpa2/Was/Blm/Fignl1/Polq/Rad18/Rad51ap1/Chek1/Rad51/Usp51/Ankle1/Parpbp/Rmi2/Cgas/Tex15/Radx/Cd28	28
GO:0090307	mitotic spindle assembly	21/1197	57/23210	2.7679e-13	1.54186e-11	1.09305e-11	Flna/Smc1a/Smc3/Racgap1/Stag1/Tpx2/Kif11/Cep192/Cdc20/Kif23/Plk1/Aaas/Kifc1/Aurkb/Birc5/Kif4/Nek2/Kifc5b/Mybl2/Chek2/Ccsap	21
GO:2001020	regulation of response to DNA damage stimulus	40/1197	209/23210	5.22145e-13	2.84865e-11	2.01945e-11	Nsd2/Dek/Fmr1/Smchd1/Pcna/Zfp385a/Atm/Slf2/Usp1/Foxm1/Paxip1/Rnf168/Rfwd3/Rnf169/Timeless/Atad5/Ddx11/Spidr/Rpa2/Was/Blm/Fignl1/Slf1/Wdr76/Polq/Rad51ap1/Chek1/Fbxo5/Chek2/Rad51/Usp51/Pmaip1/Ankle1/Parpbp/Rmi2/Cgas/Ddias/Tex15/Aunip/Radx	40
GO:0000079	regulation of cyclin-dependent protein serine/threonine kinase activity	23/1197	72/23210	6.78136e-13	3.66194e-11	2.596e-11	Actb/Ccnd1/Ccnd2/Ccng1/Ccna2/Ccnb1/Ccng2/Cdkn2c/Cdkn1a/Pdgfb/Plk1/Ccnb2/Ccnf/Blm/Psrc1/Hhex/Ccne2/Stil/Cdc6/Ccne1/Tfap4/Cdkn2b/Ccna1	23
GO:0022616	DNA strand elongation	13/1197	20/23210	9.4713e-13	5.01221e-11	3.55323e-11	Nucks1/Pcna/Mcm7/Mcm4/Lig1/Mcm3/Pold3/Pole/Mre11a/Rad50/Pola1/Dna2/Gins1	13
GO:0051383	kinetochore organization	13/1197	20/23210	9.4713e-13	5.01221e-11	3.55323e-11	Smc4/Smc2/Cenpc1/Cenpa/Cenpe/Nuf2/Cdt1/Ndc80/Cenpn/Cenpk/Cenph/Cenps/Cenpw	13
GO:0042110	T cell activation	66/1197	491/23210	9.83272e-13	5.15196e-11	3.6523e-11	Egr1/Sirpa/Zfp36l2/Myh9/Vsir/Msn/Vcam1/Nckap1l/Nfkbiz/Cxadr/Sp3/Tgfbr2/Lcp1/Mdk/Il6ra/Tgfb1/Dock8/Dock2/Tnfrsf1b/Nfatc3/Efnb2/Ptprc/Syk/Ikzf1/Apbb1ip/Cdk6/Itgam/Vav1/Ptpn6/Hes1/Stat6/Itgb2/Rac2/Efnb1/Pknox1/Cd86/Ccdc88b/Foxp1/Fanca/Elf4/Was/Tcf7/Malt1/Blm/Sash3/Fancd2/Gpr183/Icosl/Il1rl2/Rab27a/Clec4a2/Tnfaip8l2/Relb/Ripk2/Ceacam1/Il7r/Cgas/Ccr2/Irf4/Il2rg/Slamf6/Btnl2/Cd28/Spta1/Cd2/Btla	66
GO:0010639	negative regulation of organelle organization	58/1197	401/23210	1.13413e-12	5.88412e-11	4.17134e-11	H3f3b/Tpm1/Rad21/Dnmt1/Wasf2/Top2a/Bmp7/Cdk5rap2/Evl/Ctc1/Stmn1/Mcm2/Esr1/Dcp2/Atm/Cep192/Pecam1/Ccnb1/Spi1/Ckap2/Phldb2/Atad2/Cenpe/Bub1b/Mad2l1/Rad50/Tinf2/Plk1/Kifc1/Aurkb/Anapc15/Bub1/Lrrk1/Birc5/Ccnf/Mdm1/Cdt1/Was/Tmod1/Ttk/Nek2/Pttg1/Mtbp/Pif1/Mid1/Ndc80/Apobec1/Chek1/Fbxo5/Kank4/Recql4/Plekhh2/Gen1/Trip13/Met/Spdl1/Espn/Spta1	58
GO:1902969	mitotic DNA replication	11/1197	14/23210	2.07115e-12	1.06413e-10	7.54378e-11	Mcm6/Mcm2/Mcm4/Lig1/Mcm3/Pola1/Brca2/Cdc45/Chek2/Rad51/Gins1	11
GO:1904029	regulation of cyclin-dependent protein kinase activity	23/1197	76/23210	2.43655e-12	1.23983e-10	8.78935e-11	Actb/Ccnd1/Ccnd2/Ccng1/Ccna2/Ccnb1/Ccng2/Cdkn2c/Cdkn1a/Pdgfb/Plk1/Ccnb2/Ccnf/Blm/Psrc1/Hhex/Ccne2/Stil/Cdc6/Ccne1/Tfap4/Cdkn2b/Ccna1	23
GO:0051310	metaphase plate congression	20/1197	57/23210	2.95498e-12	1.48931e-10	1.0558e-10	Cenpf/Ccnb1/Cenpc1/Nup62/Cenpe/Spag5/Kif22/Cdca8/Nuf2/Kif2c/Cenpq/Brca2/Cdt1/Kif14/Psrc1/Ndc80/Fam83d/Kif18a/Cdca5/Spdl1	20
GO:0008608	attachment of spindle microtubules to kinetochore	15/1197	30/23210	3.32757e-12	1.64575e-10	1.1667e-10	Racgap1/Ccnb1/Cenpc1/Knstrn/Cenpe/Spag5/Ect2/Nuf2/Knl1/Kif2c/Brca2/Cdt1/Nek2/Ndc80/Sgo1	15
GO:0031297	replication fork processing	15/1197	30/23210	3.32757e-12	1.64575e-10	1.1667e-10	Nucks1/Pcna/Rfwd3/Mre11a/Ddx11/Brca2/Mms22l/Blm/Tonsl/Dna2/Primpol/Rad51/Gen1/Eme1/Cenps	15
GO:0071103	DNA conformation change	42/1197	241/23210	3.55774e-12	1.74329e-10	1.23585e-10	H3f3b/Dnmt1/Hjurp/Top2a/Ncapd2/Nasp/Smchd1/Mcm6/Rpa1/Smc4/Mcm2/Mcm7/Smc2/Mcm4/Ccnb1/Nusap1/Ncapd3/Cdk1/Ncapg2/Gtf2h2/Ncaph/Recql/Resf1/Mre11a/Chaf1a/Rad50/Hat1/Ncapg/Hells/Ddx11/Blm/Pif1/Mis18a/Apobec1/Hhex/Chaf1b/Rad51/Asf1b/Recql4/Cdca5/Oip5/Cenpp	42
GO:0044774	mitotic DNA integrity checkpoint	21/1197	64/23210	3.77405e-12	1.83232e-10	1.29896e-10	Ccnd1/Top2a/Ccng1/Topbp1/Atm/Rfwd3/Cdk1/Cdkn1a/Mre11a/Tipin/Rpa2/Clspn/Blm/Donson/Ticrr/Chek2/Pidd1/Cdc6/Eme1/Stk33/Orc1	21
GO:0044843	cell cycle G1/S phase transition	36/1197	185/23210	4.55388e-12	2.19083e-10	1.55311e-10	Ccnd1/Ccnd2/Nasp/Plk2/Ccna2/Gas1/Usp37/Cdk2/Nfatc1/Rfwd3/Ptpn6/Cdkn2c/Cdkn1a/Rbl1/Jade1/Pole/Crlf3/Iqgap3/Larp7/Skp2/Dact1/Rbbp8/Tcf19/Dbf4/Rpa2/Kif14/Mtbp/E2f1/Fam83d/Cdc45/Ccne2/Pidd1/E2f7/Ccne1/Haspin/Cdkn2b	36
GO:0071897	DNA biosynthetic process	34/1197	167/23210	4.74653e-12	2.26294e-10	1.60423e-10	Hnrnpd/Pcna/Ctc1/Rpa1/Dcp2/Atm/Lig1/Rfc2/Pold1/Cdkn1a/Pdgfb/Pold3/Pole/Pclaf/Rad50/Tinf2/Aurkb/Pola1/Rfc3/Polh/Rfc5/Dtl/Cyp1b1/Nek2/Lin9/Polk/Tk1/Primpol/Chtf18/Pif1/Rfc4/Chek1/Pole2/Dscc1	34
GO:0006282	regulation of DNA repair	28/1197	117/23210	6.11705e-12	2.89031e-10	2.04898e-10	Nsd2/Dek/Smchd1/Pcna/Slf2/Usp1/Foxm1/Rnf168/Rnf169/Timeless/Ddx11/Spidr/Rpa2/Was/Blm/Fignl1/Slf1/Polq/Rad51ap1/Chek1/Rad51/Usp51/Parpbp/Rmi2/Cgas/Tex15/Aunip/Radx	28
GO:0030098	lymphocyte differentiation	56/1197	395/23210	6.32042e-12	2.95997e-10	2.09837e-10	Egr1/Zfp36l2/Vsir/Nckap1l/Nfkbiz/Sp3/Irf2bp2/Tgfbr2/Inpp5d/Mdk/Atm/Tgfb1/Dock11/Dock2/Nfatc3/Ptprc/Syk/Spi1/Ikzf1/Nfam1/Nfatc1/Cdk6/Pou2f2/Vav1/Ptpn6/Lyl1/Stat6/Plcl2/Pknox1/Foxp1/Cmtm7/Hells/Fanca/Tcf7/Malt1/Blm/Sash3/Fancd2/Gpr183/Il1rl2/Tlr9/Btk/Hhex/Relb/Ripk2/Il7r/Ccr2/Irf4/Il2rg/Cd79b/Slamf6/Cd79a/Ms4a1/Ikzf3/Ly6d/Cd28	56
GO:0032508	DNA duplex unwinding	15/1197	32/23210	1.10068e-11	5.06504e-10	3.59068e-10	Top2a/Mcm6/Rpa1/Mcm2/Mcm7/Mcm4/Gtf2h2/Recql/Mre11a/Rad50/Ddx11/Blm/Pif1/Rad51/Recql4	15
GO:0000281	mitotic cytokinesis	21/1197	68/23210	1.41392e-11	6.45039e-10	4.57278e-10	Rhob/Myh10/Rock2/Racgap1/Stmn1/Incenp/Nusap1/Ckap2/Nup62/Cenpa/Ect2/Anln/Kif23/Plk1/Kif20a/Birc5/Kif20b/Brca2/Cdt1/Kif4/Cep55	21
GO:0051303	establishment of chromosome localization	22/1197	75/23210	1.46033e-11	6.60517e-10	4.6825e-10	Cenpf/Atm/Ccnb1/Cenpc1/Nup62/Cenpe/Spag5/Kif22/Cdca8/Nuf2/Kif2c/Cenpq/Birc5/Brca2/Cdt1/Kif14/Psrc1/Ndc80/Fam83d/Kif18a/Cdca5/Spdl1	22
GO:0042113	B cell activation	56/1197	405/23210	1.72934e-11	7.75565e-10	5.4981e-10	Zfp36l2/Nsd2/Nckap1l/Slc39a10/Sp3/Irf2bp2/Inpp5d/Lyn/Mef2c/Atm/Tgfb1/Pik3cd/Dock11/Paxip1/Rnf168/Ptprc/Syk/Ikzf1/Nfam1/Nfatc1/Pou2f2/Msh6/Ptpn6/Lyl1/Stat6/Cdkn1a/Cd180/Plcl2/Cd86/Atad5/Skap2/Foxp1/Cmtm7/Blnk/Malt1/Sash3/Gpr183/Tnfrsf13b/Icosl/Tlr9/Btk/Hhex/Ung/Exo1/Bank1/Il7r/Samsn1/Il2rg/Cd79b/Fcrl1/Cd79a/Ms4a1/Ikzf3/Cd28/Btla/Gapt	56
GO:0050000	chromosome localization	22/1197	76/23210	1.95601e-11	8.69848e-10	6.16648e-10	Cenpf/Atm/Ccnb1/Cenpc1/Nup62/Cenpe/Spag5/Kif22/Cdca8/Nuf2/Kif2c/Cenpq/Birc5/Brca2/Cdt1/Kif14/Psrc1/Ndc80/Fam83d/Kif18a/Cdca5/Spdl1	22
GO:0010569	regulation of double-strand break repair via homologous recombination	17/1197	44/23210	2.10939e-11	9.3024e-10	6.59461e-10	Smchd1/Timeless/Spidr/Rpa2/Was/Blm/Fignl1/Polq/Rad51ap1/Chek1/Rad51/Usp51/Parpbp/Rmi2/Cgas/Tex15/Radx	17
GO:0006271	DNA strand elongation involved in DNA replication	10/1197	13/23210	3.18417e-11	1.3812e-09	9.79153e-10	Pcna/Mcm7/Mcm4/Lig1/Mcm3/Pold3/Pole/Pola1/Dna2/Gins1	10
GO:0071479	cellular response to ionizing radiation	20/1197	64/23210	3.39056e-11	1.45877e-09	1.03414e-09	Egr1/Rhob/Ccnd2/Nucks1/Mapk14/H2afx/Atm/Tmem109/Cdkn1a/Ect2/Spidr/Map3k20/Blm/Sfrp2/Fignl1/Bbc3/Rad51ap1/Chek2/Rad51/Ddias	20
GO:0070192	chromosome organization involved in meiotic cell cycle	21/1197	71/23210	3.55479e-11	1.51709e-09	1.07549e-09	Ncapd2/Smc4/Atm/Smc2/Ndc1/Ncapd3/Ncaph/Bub1b/Mre11a/Rad50/Bub1/Sgo2a/Fancd2/Ccne2/Rad51/Ccne1/Syce2/Trip13/Brip1/Rad51c/Tex15	21
GO:0070507	regulation of microtubule cytoskeleton organization	36/1197	199/23210	4.1144e-11	1.74187e-09	1.23484e-09	Xpo1/Smc1a/Rock2/Smc3/Cdk5rap2/Stag1/Plk2/Stmn1/Tpx2/Kif11/Clip1/Cep192/Tacc3/Ckap2/Phldb2/Nup62/Spag5/Plk1/Kifc1/Plk4/Ccnf/Mdm1/Bora/Nek2/Cep70/Psrc1/Mid1/Cenpj/Kif18a/Chek1/Stil/Ska3/Ccsap/Gen1/Met/Ska1	36
GO:0000082	G1/S transition of mitotic cell cycle	33/1197	171/23210	4.45096e-11	1.8694e-09	1.32525e-09	Ccnd1/Ccnd2/Nasp/Plk2/Usp37/Cdk2/Nfatc1/Rfwd3/Ptpn6/Cdkn2c/Cdkn1a/Rbl1/Jade1/Pole/Crlf3/Iqgap3/Larp7/Skp2/Dact1/Rbbp8/Tcf19/Dbf4/Rpa2/Kif14/Mtbp/E2f1/Cdc45/Ccne2/Pidd1/E2f7/Ccne1/Haspin/Cdkn2b	33
GO:0001667	ameboidal-type cell migration	55/1197	407/23210	6.41629e-11	2.65274e-09	1.88056e-09	Sparc/Jun/Lgmn/Rhob/P2ry12/Myh9/Srgap2/Tgfbr1/Wasf2/Rock2/Sp1/Bmp7/Evl/Dab2ip/Tgfbr2/Pmp22/Lrp5/Akap12/Mef2c/Plk2/Sema7a/Ctsh/Adgra2/Ets1/Map3k3/Tgfb1/Paxip1/Tek/Pecam1/Efnb2/Rreb1/Arhgdib/Pdgfb/Itga4/Sema3g/Itgb2/Anln/Efnb1/Prcp/Nanos1/Cyp1b1/Clec14a/Sema3c/Prr5l/Sh3bp1/Epha2/Ret/Edn3/Ceacam1/Itgb3/Ccbe1/Met/Hspb1/Pkn3/Lefty1	55
GO:0051656	establishment of organelle localization	50/1197	350/23210	6.5148e-11	2.67258e-09	1.89463e-09	Picalm/Myh9/Myh10/Actn4/Xpo1/Spry1/Exoc4/Cdk5rap2/Tacc1/Sun2/Lyn/Cenpf/Atm/Ccnb1/Tacc3/Syk/Nusap1/Cenpc1/Nup62/Cenpa/Itga4/Cenpe/Spag5/Rac2/Kif22/Cdca8/Nuf2/Mad2l1/Kif23/Plk1/Kif2c/Kifc1/Cenpq/Birc5/Brca2/Cdt1/Kif14/Psrc1/Rab27a/Ndc80/Btk/Fam83d/Kif18a/Hhex/Cdca5/Spdl1/Foxf1/Adora3/Mreg/Cdh3	50
GO:1901989	positive regulation of cell cycle phase transition	24/1197	96/23210	7.32923e-11	2.98356e-09	2.11509e-09	Ccnd1/Ccnd2/Lmnb1/Tgfb1/Ccnb1/Cdk1/Ube2c/Cenpe/Cdc25b/Atad5/Larp7/Birc5/Dbf4/Dtl/Cdt1/Cdc25c/Mtbp/Fam83d/Cdc45/Fbxo5/Ccne1/Cdca5/Rad51c/Rad51b	24
GO:0051298	centrosome duplication	20/1197	67/23210	8.63856e-11	3.48971e-09	2.47391e-09	Xpo1/Rock2/Cdk5rap2/Plk2/Cep192/Cdk2/Nup62/Kifc1/Cep135/Plk4/Ccnf/Brca2/Wdr62/Mdm1/Cep152/Sass6/Cep72/Cenpj/Stil/Gen1	20
GO:1901992	positive regulation of mitotic cell cycle phase transition	22/1197	83/23210	1.31649e-10	5.27793e-09	3.74161e-09	Ccnd1/Ccnd2/Lmnb1/Tgfb1/Ccnb1/Cdk1/Ube2c/Cenpe/Cdc25b/Larp7/Birc5/Dbf4/Dtl/Cdt1/Cdc25c/Mtbp/Cdc45/Fbxo5/Ccne1/Cdca5/Rad51c/Rad51b	22
GO:0071459	protein localization to chromosome, centromeric region	12/1197	22/23210	1.34088e-10	5.32574e-09	3.7755e-09	Cdk1/Cenpa/Bub1b/Knl1/Aurkb/Cenpq/Cdt1/Ttk/Mtbp/Ndc80/Spdl1/Haspin	12
GO:0070663	regulation of leukocyte proliferation	39/1197	238/23210	1.4221e-10	5.57462e-09	3.95193e-09	Vsir/Vcam1/Nckap1l/Slc39a10/Tgfbr2/Inpp5d/Lyn/Mef2c/Il6ra/Atm/Tgfb1/Tnfrsf1b/Ptprc/Syk/Ptpn6/Hes1/Cdkn1a/Rac2/Efnb1/Cd86/Ccdc88b/Atad5/Blm/Sash3/Gpr183/Tnfrsf13b/Icosl/Tlr9/Btk/Hhex/Ripk2/Enpp3/Ceacam1/Ccr2/Btnl2/Ikzf3/Cd28/Spta1/Btla	39
GO:0033674	positive regulation of kinase activity	60/1197	476/23210	1.52046e-10	5.91636e-09	4.1942e-09	Pdgfra/Csf1r/Egr1/Ccnd1/Trf/Tgfbr1/Ccnd2/Akap13/Lmo4/Grm5/Dab2ip/Iqgap1/Tgfbr2/Lyn/Tpx2/Il6ra/Map3k3/Tgfb1/Tiam1/Tek/Ptprc/Syk/Pik3cg/Magi3/Ncapg2/Cdkn1a/Pdgfb/Stk10/Nab2/Cenpe/Ect2/Cdc25b/Iqgap3/Mre11a/Rad50/Map3k20/Clspn/Bora/Kif14/Malt1/Map3k14/Tal1/Tnfrsf11a/Pik3r5/Mdfic/Tlr9/Psrc1/Map3k8/Stil/Ripk2/Ret/Tlr1/Edn3/Cdc6/Ceacam1/Cass4/Itgb3/Met/Map4k1/Lpar2	60
GO:0002263	cell activation involved in immune response	42/1197	273/23210	2.16276e-10	8.35427e-09	5.92247e-09	Cx3cr1/Nsd2/Nfkbiz/Lcp1/Mdk/Lyn/Tgfb1/Dock11/Paxip1/Dock2/Rnf168/Ptprc/Syk/Apbb1ip/Itgam/Msh6/Stat6/Myo1f/Cd180/Plcl2/Itgb2/Rac2/Atad5/Ptafr/Foxp1/Malt1/Gpr183/Icosl/Rab27a/Btk/Relb/Ripk2/Ung/Exo1/Enpp3/Foxf1/Ccr2/Adora3/Irf4/Slamf6/Cd28/Gapt	42
GO:0032392	DNA geometric change	15/1197	38/23210	2.2462e-10	8.61367e-09	6.10636e-09	Top2a/Mcm6/Rpa1/Mcm2/Mcm7/Mcm4/Gtf2h2/Recql/Mre11a/Rad50/Ddx11/Blm/Pif1/Rad51/Recql4	15
GO:0000077	DNA damage checkpoint	24/1197	101/23210	2.29309e-10	8.73025e-09	6.189e-09	Ccnd1/Mapk14/Ccng1/Cdc5l/Atm/Rfwd3/Cdk1/Cdkn1a/Mre11a/Plk1/Tipin/Map3k20/Rpa2/Dtl/Clspn/Blm/Donson/Wdr76/E2f1/Chek1/Chek2/Pidd1/Eme1/Stk33	24
GO:1903039	positive regulation of leukocyte cell-cell adhesion	35/1197	203/23210	3.01516e-10	1.13973e-08	8.07973e-09	Sirpa/Vsir/Vcam1/Nckap1l/Nfkbiz/Tgfbr2/Mdk/Il6ra/Ets1/Tgfb1/Dock8/Efnb2/Ptprc/Syk/Ikzf1/Hes1/Itga4/Itgb2/Efnb1/Cd86/Ccdc88b/Ptafr/Malt1/Blm/Sash3/Icosl/Il1rl2/Ripk2/Ceacam1/Il7r/Ccr2/Il2rg/Btnl2/Cd28/Spta1	35
GO:0032886	regulation of microtubule-based process	38/1197	235/23210	3.62899e-10	1.36203e-08	9.65562e-09	Xpo1/Smc1a/Rock2/Smc3/Cdk5rap2/Tacc1/Stag1/Plk2/Stmn1/Tpx2/Kif11/Clip1/Cep192/Tacc3/Ckap2/Phldb2/Nup62/Spag5/Plk1/Kifc1/Plk4/Ccnf/Mdm1/Bora/Nek2/Cep70/Psrc1/Mid1/Cenpj/Kif18a/Chek1/Stil/Ska3/Ccsap/Gen1/Met/Ska1/Dnah11	38
GO:0050670	regulation of lymphocyte proliferation	37/1197	225/23210	3.79297e-10	1.41355e-08	1.00209e-08	Vsir/Vcam1/Nckap1l/Slc39a10/Tgfbr2/Inpp5d/Lyn/Mef2c/Il6ra/Atm/Tgfb1/Tnfrsf1b/Ptprc/Syk/Ptpn6/Hes1/Cdkn1a/Rac2/Efnb1/Cd86/Ccdc88b/Atad5/Blm/Sash3/Gpr183/Tnfrsf13b/Icosl/Tlr9/Btk/Ripk2/Ceacam1/Ccr2/Btnl2/Ikzf3/Cd28/Spta1/Btla	37
GO:0000910	cytokinesis	30/1197	157/23210	4.33383e-10	1.60382e-08	1.13697e-08	Rhob/Myh9/Myh10/Rock2/Racgap1/Plk2/Stmn1/Prc1/Incenp/Nusap1/Ckap2/Nup62/Cenpa/Ect2/Cdc25b/Anln/Kif23/Plk1/Kif20a/Aurkb/Birc5/Kif20b/Brca2/Cdt1/Kif14/Kif4/Aurka/Cep55/Cdc6/E2f7	30
GO:0051054	positive regulation of DNA metabolic process	35/1197	206/23210	4.55223e-10	1.67294e-08	1.18598e-08	Nsd2/Hnrnpd/Igfbp3/Smchd1/Pcna/Atm/Slf2/Tgfb1/Foxm1/Paxip1/Rfc2/Cdk2/Rnf168/Ptprc/Stat6/Pdgfb/Mre11a/Rad50/Timeless/Atad5/Aurkb/Ddx11/Spidr/Rfc3/Rfc5/Was/Cyp1b1/Blm/Nek2/Slf1/Chtf18/Rfc4/Rad51/Dscc1/Cd28	35
GO:0032944	regulation of mononuclear cell proliferation	37/1197	227/23210	4.90385e-10	1.78974e-08	1.26877e-08	Vsir/Vcam1/Nckap1l/Slc39a10/Tgfbr2/Inpp5d/Lyn/Mef2c/Il6ra/Atm/Tgfb1/Tnfrsf1b/Ptprc/Syk/Ptpn6/Hes1/Cdkn1a/Rac2/Efnb1/Cd86/Ccdc88b/Atad5/Blm/Sash3/Gpr183/Tnfrsf13b/Icosl/Tlr9/Btk/Ripk2/Ceacam1/Ccr2/Btnl2/Ikzf3/Cd28/Spta1/Btla	37
GO:1903706	regulation of hemopoiesis	53/1197	407/23210	5.59147e-10	2.02671e-08	1.43677e-08	Fos/Csf1r/Zfp36/Jun/Zfp36l2/Vsir/Nfkbia/Nckap1l/Nfkbiz/Tgfbr2/Inpp5d/Mapk14/Mdk/Hmgb2/Lyn/Mef2c/Trib1/Ets1/Tgfb1/Jag1/Lmo2/Tmem64/Rcor1/Ptprc/Syk/Spi1/Ikzf1/Nfam1/Cdk6/Ptpn6/Ncapg2/Hes1/Hcls1/Ubash3b/Klf10/Inpp4b/Casp8/Fanca/Malt1/Sash3/Tal1/Fancd2/Il1rl2/Tlr9/Ripk2/Ceacam1/Itgb3/Ankle1/Il7r/Ccr2/Il2rg/Ikzf3/Cd28	53
GO:0048872	homeostasis of number of cells	45/1197	315/23210	5.86156e-10	2.11016e-08	1.49593e-08	Zfp36/Epas1/Nckap1l/Sp1/Zbtb18/Ptbp3/Sp3/Ildr2/Inpp5d/Mapk14/Afdn/Hmgb2/Lyn/Mef2c/Sh2b3/Rpa1/Slc40a1/Arid4a/Ets1/Tgfb1/Pik3cd/Dock11/Lmo2/Rcor1/Spi1/Ikzf1/Cdk6/Ncapg2/Hcls1/Pknox1/Ccnb2/Bcl2l11/Sash3/Tal1/Gpr183/Tnfrsf13b/Lyar/Fancc/Ceacam1/Pmaip1/Il7r/Ccr2/Tex15/Spta1/Gapt	45
GO:0050673	epithelial cell proliferation	54/1197	425/23210	9.48393e-10	3.39115e-08	2.40404e-08	Sparc/Zfp36/Jun/Ccnd1/Mki67/Tgfbr1/Ccnd2/Igfbp4/Lims1/Sp1/Dab2ip/Igfbp3/Cxadr/Mdk/Hmgb2/Mef2c/Gas1/Suz12/Esr1/Rps6ka1/Tgfb1/Uhrf1/Cd34/Cflar/Tek/Sav1/Efnb2/Itpr1/Cdk6/Rreb1/Aplnr/Hes1/Stat6/B4galt1/Pdgfb/Itga4/Iqgap3/Tinf2/Foxp1/Birc5/Tcf19/Brca2/Bmp6/Sfrp2/Epha2/Ceacam1/Bmp5/Itgb3/Lgr5/Cdh3/Cdkn2b/Klk8/Irf6/Ehf	54
GO:0065004	protein-DNA complex assembly	31/1197	172/23210	1.00893e-09	3.58338e-08	2.54031e-08	H3f3b/Hjurp/Nasp/Mcm6/Mcm5/Mcm2/Esr1/Mcm7/Mcm4/Mcm3/Ikzf1/Cenpc1/Cenpa/Cenpe/Chaf1a/Hat1/Hells/Cdt1/Mis18a/Cenpi/Cenpn/Cdc45/Chaf1b/Rad51/Asf1b/Cenpk/Cenph/Oip5/Cenps/Cenpw/Cenpp	31
GO:0061640	cytoskeleton-dependent cytokinesis	22/1197	92/23210	1.12689e-09	3.97567e-08	2.81841e-08	Rhob/Myh10/Rock2/Racgap1/Stmn1/Incenp/Nusap1/Ckap2/Nup62/Cenpa/Ect2/Anln/Kif23/Plk1/Kif20a/Aurkb/Birc5/Kif20b/Brca2/Cdt1/Kif4/Cep55	22
GO:0007080	mitotic metaphase plate congression	15/1197	42/23210	1.1788e-09	4.13125e-08	2.92871e-08	Ccnb1/Cenpc1/Nup62/Cenpe/Kif22/Cdca8/Nuf2/Kif2c/Cdt1/Kif14/Psrc1/Ndc80/Kif18a/Cdca5/Spdl1	15
GO:0006268	DNA unwinding involved in DNA replication	9/1197	13/23210	1.4851e-09	5.17049e-08	3.66544e-08	Mcm6/Rpa1/Mcm2/Mcm7/Mcm4/Recql/Blm/Rad51/Recql4	9
GO:0034501	protein localization to kinetochore	10/1197	17/23210	1.79022e-09	6.19207e-08	4.38965e-08	Cdk1/Knl1/Aurkb/Cenpq/Cdt1/Ttk/Mtbp/Ndc80/Spdl1/Haspin	10
GO:0060249	anatomical structure homeostasis	51/1197	398/23210	2.07134e-09	7.11787e-08	5.04597e-08	Csf1r/Epas1/Ctss/Trf/Hnrnpd/Cxadr/Ildr2/Tmem119/Inpp5d/Pcna/Ctc1/Rpa1/Ptgs1/Dcp2/Ctsh/Atm/Tgfb1/Cd34/Tmem64/Syk/Ubash3b/Rac2/Mre11a/Rad50/Tinf2/Aurkb/Nanos1/Lrrk1/Brca2/Rpa2/Mdm1/Blm/Sash3/Tnfrsf11a/Nek2/Dna2/Tlr9/Pif1/Col2a1/Ccne2/Rad51/Recql4/Ccne1/Ceacam1/Itgb3/Rad51c/P2rx1/Ccr2/Cdh3/Tex15/Pthlh	51
GO:0030183	B cell differentiation	28/1197	149/23210	2.43662e-09	8.3191e-08	5.89753e-08	Zfp36l2/Nckap1l/Sp3/Irf2bp2/Inpp5d/Atm/Dock11/Ptprc/Syk/Ikzf1/Nfam1/Nfatc1/Pou2f2/Ptpn6/Lyl1/Plcl2/Foxp1/Cmtm7/Malt1/Gpr183/Tlr9/Btk/Hhex/Il2rg/Cd79b/Cd79a/Ms4a1/Ikzf3	28
GO:0007099	centriole replication	14/1197	38/23210	2.63421e-09	8.93606e-08	6.33491e-08	Cdk5rap2/Plk2/Cep192/Cdk2/Nup62/Cep135/Plk4/Wdr62/Mdm1/Cep152/Sass6/Cep72/Cenpj/Stil	14
GO:0045860	positive regulation of protein kinase activity	54/1197	438/23210	2.80973e-09	9.47077e-08	6.71397e-08	Csf1r/Egr1/Ccnd1/Trf/Tgfbr1/Ccnd2/Akap13/Grm5/Dab2ip/Iqgap1/Tgfbr2/Tpx2/Il6ra/Map3k3/Tgfb1/Tiam1/Ptprc/Syk/Pik3cg/Magi3/Ncapg2/Cdkn1a/Pdgfb/Stk10/Nab2/Cenpe/Ect2/Cdc25b/Iqgap3/Map3k20/Clspn/Bora/Kif14/Malt1/Map3k14/Tal1/Tnfrsf11a/Pik3r5/Mdfic/Tlr9/Psrc1/Map3k8/Stil/Ripk2/Ret/Tlr1/Edn3/Cdc6/Ceacam1/Cass4/Itgb3/Met/Map4k1/Lpar2	54
GO:0098534	centriole assembly	14/1197	39/23210	3.91469e-09	1.31117e-07	9.29512e-08	Cdk5rap2/Plk2/Cep192/Cdk2/Nup62/Cep135/Plk4/Wdr62/Mdm1/Cep152/Sass6/Cep72/Cenpj/Stil	14
GO:0000076	DNA replication checkpoint	9/1197	14/23210	3.96699e-09	1.32034e-07	9.36006e-08	Topbp1/Timeless/Tipin/Cdt1/Clspn/Dna2/Ticrr/Cdc6/Orc1	9
GO:0007264	small GTPase mediated signal transduction	57/1197	485/23210	5.98151e-09	1.9661e-07	1.3938e-07	Jun/Rhob/Gdi2/Rasa3/Dnmt1/Wasf2/Akap13/Rap1b/Spry1/Rab8b/Rock2/Rhoq/Spata13/Cyth4/Dab2ip/Plk2/Cd2ap/Sipa1/Rapgef5/Bnip2/Stmn1/Heg1/Rasgrp3/Foxm1/Dock8/Tiam1/Dock11/Cgnl1/Dock2/Pecam1/Arhgap19/Vav1/Arhgap30/Cyth3/Arhgef6/Arhgdib/Nup62/Baiap2/Ect2/Rac2/Iqgap3/Cdon/Was/Rab32/Kif14/Rras/Lpar6/Rab27a/Sh3bp1/Psd4/Arhgef39/Rab39/Met/Gpr35/Lpar2/P2ry10b/Ccdc125	57
GO:0000727	double-strand break repair via break-induced replication	8/1197	11/23210	7.02218e-09	2.29391e-07	1.62619e-07	Mcm6/Mcm5/Mcm2/Mcm7/Mcm4/Mcm3/Cdc45/Gins2	8
GO:0051302	regulation of cell division	28/1197	156/23210	7.08466e-09	2.30012e-07	1.63059e-07	Txnip/Zbtb18/Racgap1/Mdk/Plk2/Prc1/Aspm/Tgfb1/Incenp/Nup62/Pdgfb/Rbl1/Ect2/Cdc25b/Kif23/Kif18b/Plk1/Kif20a/Aurkb/Kif20b/Brca2/Kif14/Blm/Tal1/Sfrp2/Aurka/Cdc6/E2f7	28
GO:2000104	negative regulation of DNA-dependent DNA replication	10/1197	19/23210	7.73305e-09	2.4802e-07	1.75825e-07	Smc1a/Smc3/Msh6/Mre11a/Timeless/Tipin/Brca2/Donson/Fbxo5/Chek2	10
GO:0050870	positive regulation of T cell activation	31/1197	187/23210	8.15976e-09	2.5999e-07	1.84311e-07	Sirpa/Vsir/Vcam1/Nckap1l/Nfkbiz/Tgfbr2/Mdk/Il6ra/Tgfb1/Dock8/Efnb2/Ptprc/Syk/Ikzf1/Hes1/Efnb1/Cd86/Ccdc88b/Malt1/Blm/Sash3/Icosl/Il1rl2/Ripk2/Ceacam1/Il7r/Ccr2/Il2rg/Btnl2/Cd28/Spta1	31
GO:0046631	alpha-beta T cell activation	28/1197	157/23210	8.20451e-09	2.5999e-07	1.84311e-07	Vsir/Nckap1l/Nfkbiz/Tgfbr2/Il6ra/Tgfb1/Dock2/Ptprc/Syk/Ikzf1/Stat6/Foxp1/Elf4/Tcf7/Malt1/Blm/Sash3/Gpr183/Clec4a2/Relb/Ripk2/Ceacam1/Ccr2/Irf4/Il2rg/Slamf6/Cd28/Btla	28
GO:0044773	mitotic DNA damage checkpoint	16/1197	56/23210	1.33722e-08	4.21224e-07	2.98612e-07	Ccnd1/Ccng1/Atm/Rfwd3/Cdk1/Cdkn1a/Mre11a/Tipin/Rpa2/Clspn/Blm/Donson/Chek2/Pidd1/Eme1/Stk33	16
GO:0071214	cellular response to abiotic stimulus	40/1197	292/23210	1.75433e-08	5.46112e-07	3.87147e-07	Actb/Egr1/Rhob/Ccnd2/Nucks1/Fmr1/Mapk14/Pcna/Sipa1/H2afx/Trp53inp1/Atm/N4bp1/Piezo1/Rnf168/Tmem109/Pold1/Cdkn1a/Pbk/Pold3/Ect2/Rcsd1/Aurkb/Bmf/Spidr/Map3k20/Polh/Blm/Sfrp2/Polk/Fignl1/Bbc3/Rad51ap1/Chek1/Relb/Chek2/Rad51/Ddias/Capn3/Trpm1	40
GO:0042098	T cell proliferation	32/1197	205/23210	2.1023e-08	6.50605e-07	4.61224e-07	Vsir/Msn/Vcam1/Nckap1l/Tgfbr2/Il6ra/Tgfb1/Dock8/Dock2/Tnfrsf1b/Ptprc/Syk/Itgam/Ptpn6/Hes1/Itgb2/Rac2/Efnb1/Cd86/Ccdc88b/Elf4/Malt1/Blm/Sash3/Icosl/Ripk2/Ceacam1/Ccr2/Btnl2/Cd28/Spta1/Btla	32
GO:1902105	regulation of leukocyte differentiation	40/1197	294/23210	2.12819e-08	6.53096e-07	4.62989e-07	Fos/Csf1r/Jun/Zfp36l2/Vsir/Nckap1l/Nfkbiz/Tgfbr2/Inpp5d/Mdk/Lyn/Trib1/Tgfb1/Tmem64/Ptprc/Syk/Ikzf1/Nfam1/Cdk6/Ptpn6/Hcls1/Ubash3b/Klf10/Inpp4b/Casp8/Fanca/Malt1/Sash3/Tal1/Fancd2/Il1rl2/Tlr9/Ripk2/Ceacam1/Itgb3/Il7r/Ccr2/Il2rg/Ikzf3/Cd28	40
GO:1901342	regulation of vasculature development	44/1197	341/23210	2.13503e-08	6.53096e-07	4.62989e-07	Sparc/Egr1/Rhob/Cx3cr1/Adam10/Dnmt1/Rock2/Sp1/Bmp7/Pde3b/Adam12/Btg1/Dab2ip/Tgfbr2/Mdk/Plk2/Il6ra/Ctsh/Adgra2/Ets1/Map3k3/Cd34/Cflar/Tek/Nfatc3/Efnb2/Nfatc1/Aplnr/Pdgfb/Itgb2/Cyp1b1/Rras/Sfrp2/Ecscr/Emilin1/Hhex/Epha2/Cysltr1/Ceacam1/Itgb3/Ccbe1/Hspb1/Ccr2/Adm	44
GO:0046605	regulation of centrosome cycle	16/1197	58/23210	2.32856e-08	7.08205e-07	5.02057e-07	Xpo1/Rock2/Cdk5rap2/Plk2/Kif11/Cep192/Nup62/Kifc1/Plk4/Ccnf/Mdm1/Nek2/Cenpj/Chek1/Stil/Gen1	16
GO:0070665	positive regulation of leukocyte proliferation	26/1197	145/23210	2.47434e-08	7.4824e-07	5.30439e-07	Vcam1/Nckap1l/Slc39a10/Tgfbr2/Lyn/Mef2c/Il6ra/Ptprc/Syk/Hes1/Cdkn1a/Efnb1/Cd86/Ccdc88b/Atad5/Blm/Sash3/Gpr183/Icosl/Tlr9/Ripk2/Ceacam1/Ccr2/Btnl2/Cd28/Spta1	26
GO:0090130	tissue migration	39/1197	285/23210	2.71686e-08	8.1691e-07	5.7912e-07	Sparc/Jun/Lgmn/Rhob/Myh9/Tgfbr1/Rock2/Sp1/Evl/Dab2ip/Tgfbr2/Mef2c/Plk2/Ctsh/Adgra2/Ets1/Map3k3/Tgfb1/Paxip1/Tek/Pecam1/Efnb2/Rreb1/Pdgfb/Itgb2/Anln/Prcp/Nanos1/Cyp1b1/Clec14a/Sh3bp1/Epha2/Ceacam1/Itgb3/Ccbe1/Met/Hspb1/Foxf1/Pkn3	39
GO:0050671	positive regulation of lymphocyte proliferation	25/1197	136/23210	2.73669e-08	8.18224e-07	5.80051e-07	Vcam1/Nckap1l/Slc39a10/Tgfbr2/Mef2c/Il6ra/Ptprc/Syk/Hes1/Cdkn1a/Efnb1/Cd86/Ccdc88b/Atad5/Blm/Sash3/Gpr183/Icosl/Tlr9/Ripk2/Ceacam1/Ccr2/Btnl2/Cd28/Spta1	25
GO:0046777	protein autophosphorylation	35/1197	240/23210	2.77023e-08	8.236e-07	5.83863e-07	Pdgfra/Csf1r/Jun/Tgfbr1/Iqgap1/Mapk14/Mknk2/Lyn/Atm/Map3k3/Cdkl5/Stk17b/Tek/Ptprc/Syk/Sla/Pdgfb/Stk10/Vrk1/Mre11a/Rad50/Ttk/Mvp/Pask/Nek2/Enpp1/Melk/Btk/Chek2/Mapkapk3/Vrk2/Met/Map4k1/Stk33/Blk	35
GO:1903708	positive regulation of hemopoiesis	32/1197	208/23210	2.99668e-08	8.85945e-07	6.2806e-07	Fos/Csf1r/Jun/Vsir/Nckap1l/Nfkbiz/Tgfbr2/Inpp5d/Mapk14/Mdk/Hmgb2/Trib1/Ets1/Tgfb1/Jag1/Tmem64/Rcor1/Ptprc/Syk/Ikzf1/Hcls1/Klf10/Casp8/Malt1/Sash3/Tal1/Il1rl2/Ripk2/Itgb3/Il7r/Ccr2/Il2rg	32
GO:1902750	negative regulation of cell cycle G2/M phase transition	15/1197	52/23210	3.29038e-08	9.67373e-07	6.85785e-07	Rad21/Ccng1/Topbp1/Atm/Cdk1/Mre11a/Plk1/Dtl/Clspn/Blm/Donson/Ticrr/Chek1/Cdc6/Orc1	15
GO:0051640	organelle localization	56/1197	497/23210	3.56871e-08	1.0434e-06	7.39685e-07	Picalm/Myh9/Myh10/Actn4/Xpo1/Spry1/Rab8b/Mef2a/Exoc4/Cdk5rap2/Tacc1/Sun2/Lyn/Cenpf/Atm/Aspm/Ccnb1/Tacc3/Syk/Nusap1/Cenpc1/Esyt1/Pik3cg/Nup62/Cenpa/Itga4/Cenpe/Spag5/Rac2/Kif22/Cdca8/Nuf2/Mad2l1/Kif23/Plk1/Kif2c/Kifc1/Cenpq/Birc5/Brca2/Cdt1/Kif14/Psrc1/Rab27a/Aurka/Ndc80/Btk/Fam83d/Kif18a/Hhex/Cdca5/Spdl1/Foxf1/Adora3/Mreg/Cdh3	56
GO:0032946	positive regulation of mononuclear cell proliferation	25/1197	138/23210	3.70265e-08	1.07662e-06	7.63229e-07	Vcam1/Nckap1l/Slc39a10/Tgfbr2/Mef2c/Il6ra/Ptprc/Syk/Hes1/Cdkn1a/Efnb1/Cd86/Ccdc88b/Atad5/Blm/Sash3/Gpr183/Icosl/Tlr9/Ripk2/Ceacam1/Ccr2/Btnl2/Cd28/Spta1	25
GO:0010631	epithelial cell migration	38/1197	281/23210	5.61068e-08	1.6225e-06	1.15021e-06	Sparc/Jun/Lgmn/Rhob/Myh9/Tgfbr1/Rock2/Sp1/Evl/Dab2ip/Tgfbr2/Mef2c/Plk2/Ctsh/Adgra2/Ets1/Map3k3/Tgfb1/Paxip1/Tek/Pecam1/Efnb2/Rreb1/Pdgfb/Itgb2/Anln/Prcp/Nanos1/Cyp1b1/Clec14a/Sh3bp1/Epha2/Ceacam1/Itgb3/Ccbe1/Met/Hspb1/Pkn3	38
GO:0051984	positive regulation of chromosome segregation	11/1197	28/23210	6.25319e-08	1.79847e-06	1.27496e-06	Rad21/Slf2/Ccnb1/Cenpe/Fen1/Ddx11/Cdt1/Sgo2a/Slf1/Rad18/Cdc6	11
GO:0048771	tissue remodeling	30/1197	193/23210	6.34676e-08	1.81552e-06	1.28705e-06	Csf1r/Epas1/Ctss/Flna/Trf/Rock2/Tmem119/Inpp5d/Lrp5/Mdk/Mef2c/Jag1/Tmem64/Nfatc3/Syk/B4galt1/Ubash3b/Itga4/Rac2/Inpp4b/Lrrk1/Tnfrsf11a/Enpp1/Sema3c/Epha2/Ceacam1/Gja5/Itgb3/Ccr2/Efna4	30
GO:1901976	regulation of cell cycle checkpoint	12/1197	34/23210	6.38473e-08	1.81656e-06	1.28779e-06	Cdk5rap2/Ccnb1/Rfwd3/Mad2l1/Anapc15/Rpa2/Cdt1/Aurka/Wdr76/Ndc80/Chek2/Gen1	12
GO:0071824	protein-DNA complex subunit organization	32/1197	215/23210	6.65031e-08	1.882e-06	1.33418e-06	H3f3b/Hjurp/Supt16/Nasp/Mcm6/Mcm5/Mcm2/Esr1/Mcm7/Mcm4/Mcm3/Ikzf1/Cenpc1/Cenpa/Cenpe/Chaf1a/Hat1/Hells/Cdt1/Mis18a/Cenpi/Cenpn/Cdc45/Chaf1b/Rad51/Asf1b/Cenpk/Cenph/Oip5/Cenps/Cenpw/Cenpp	32
GO:0090132	epithelium migration	38/1197	283/23210	6.77905e-08	1.90823e-06	1.35277e-06	Sparc/Jun/Lgmn/Rhob/Myh9/Tgfbr1/Rock2/Sp1/Evl/Dab2ip/Tgfbr2/Mef2c/Plk2/Ctsh/Adgra2/Ets1/Map3k3/Tgfb1/Paxip1/Tek/Pecam1/Efnb2/Rreb1/Pdgfb/Itgb2/Anln/Prcp/Nanos1/Cyp1b1/Clec14a/Sh3bp1/Epha2/Ceacam1/Itgb3/Ccbe1/Met/Hspb1/Pkn3	38
GO:0002699	positive regulation of immune effector process	36/1197	261/23210	7.53073e-08	2.1086e-06	1.49482e-06	Nsd2/Nfkbiz/Mapk14/Lyn/Sema7a/Tgfb1/Paxip1/Tek/Ptprc/Syk/Itgam/Vav1/Stat6/Itgb2/Rac2/Atad5/Ptafr/Foxp1/Malt1/Sash3/Tlr9/Btk/Ripk2/Enpp3/Ceacam1/Foxf1/Ccr2/Adora3/Ulbp1/Slamf6/Raet1a/Raet1b/Raet1c/Raet1d/H2-Q10/Cd28	36
GO:0010972	negative regulation of G2/M transition of mitotic cell cycle	13/1197	41/23210	7.79724e-08	2.17174e-06	1.53958e-06	Rad21/Ccng1/Topbp1/Atm/Cdk1/Mre11a/Clspn/Blm/Donson/Ticrr/Chek1/Cdc6/Orc1	13
GO:0009611	response to wounding	55/1197	496/23210	8.09734e-08	2.24351e-06	1.59046e-06	Pdgfra/Zfp36/Jun/Abhd2/P2ry12/Zfp36l2/Flna/Tpm1/Myh9/Myh10/Evl/Entpd1/Cxadr/AI506816/Inpp5f/Mapk14/Lcp1/Mdk/Lyn/Bcl9/Sh2b3/Ano6/Tgfb1/Mtr/Pros1/Cd34/Cflar/Lyst/Pecam1/Elk3/Syk/Rreb1/Ptpn6/Kremen1/Phldb2/B4galt1/Cdkn1a/Pdgfb/Ubash3b/Prcp/Dhfr/Rtn4rl1/Sdc1/Rab27a/Aurka/Tfpi/Ceacam1/Itgb3/Procr/P2rx1/Foxf1/Ccr2/Adm/Capn3/Klk8	55
GO:0007143	female meiotic nuclear division	12/1197	35/23210	9.26053e-08	2.55243e-06	1.80946e-06	Top2a/Atm/Ncaph/Cdc25b/Plk1/Sgo2a/Ttk/Aurka/Mastl/Fbxo5/Trip13/Rad51c	12
GO:0000731	DNA synthesis involved in DNA repair	11/1197	29/23210	9.60506e-08	2.63368e-06	1.86705e-06	Pcna/Pold1/Pold3/Pole/Pclaf/Pola1/Polh/Dtl/Polk/Primpol/Pole2	11
GO:0043542	endothelial cell migration	30/1197	199/23210	1.27288e-07	3.4544e-06	2.44888e-06	Sparc/Lgmn/Rhob/Myh9/Tgfbr1/Rock2/Sp1/Dab2ip/Mef2c/Plk2/Adgra2/Ets1/Map3k3/Tgfb1/Paxip1/Tek/Pecam1/Efnb2/Pdgfb/Itgb2/Prcp/Cyp1b1/Clec14a/Sh3bp1/Epha2/Ceacam1/Itgb3/Ccbe1/Met/Hspb1	30
GO:1902751	positive regulation of cell cycle G2/M phase transition	11/1197	30/23210	1.44593e-07	3.90401e-06	2.76762e-06	Ccnd1/Lmnb1/Ccnb1/Cdk1/Cdc25b/Atad5/Dtl/Cdc25c/Fbxo5/Rad51c/Rad51b	11
GO:0010824	regulation of centrosome duplication	13/1197	43/23210	1.4698e-07	3.9483e-06	2.79901e-06	Xpo1/Rock2/Cdk5rap2/Plk2/Cep192/Nup62/Kifc1/Plk4/Ccnf/Mdm1/Cenpj/Stil/Gen1	13
GO:0050863	regulation of T cell activation	39/1197	304/23210	1.55915e-07	4.16719e-06	2.95418e-06	Sirpa/Vsir/Vcam1/Nckap1l/Nfkbiz/Tgfbr2/Mdk/Il6ra/Tgfb1/Dock8/Tnfrsf1b/Efnb2/Ptprc/Syk/Ikzf1/Ptpn6/Hes1/Rac2/Efnb1/Cd86/Ccdc88b/Fanca/Malt1/Blm/Sash3/Fancd2/Icosl/Il1rl2/Tnfaip8l2/Ripk2/Ceacam1/Il7r/Cgas/Ccr2/Il2rg/Btnl2/Cd28/Spta1/Btla	39
GO:0048732	gland development	52/1197	467/23210	1.59867e-07	4.25134e-06	3.01384e-06	Pdgfra/Jun/Ccnd1/Mki67/Tgfbr1/Msn/Lims1/Lmo4/Sp1/Bmp7/Sp3/Tgfbr2/Lrp5/Mdk/Ctc1/Esr1/Rps6ka1/Atm/Tgfb1/Foxm1/Cflar/Frzb/Nfatc3/Ikzf1/Itpr1/Rreb1/Gsx1/Man2a1/Hes1/Stat6/B4galt1/Pdgfb/Lama1/Iqgap3/Ccnb2/Brca2/Bcl2l11/Tnfrsf11a/Sema3c/Aurka/Hhex/Epha2/E2f7/Ceacam1/Met/Rarb/Foxf1/Tyr/Irf6/Plag1/Pthlh/Rln1	52
GO:0044818	mitotic G2/M transition checkpoint	11/1197	31/23210	2.13681e-07	5.65401e-06	4.00821e-06	Ccng1/Topbp1/Atm/Cdk1/Mre11a/Clspn/Blm/Donson/Ticrr/Cdc6/Orc1	11
GO:0002285	lymphocyte activation involved in immune response	29/1197	193/23210	2.2052e-07	5.80594e-06	4.11592e-06	Nsd2/Nfkbiz/Lcp1/Mdk/Tgfb1/Dock11/Paxip1/Rnf168/Ptprc/Apbb1ip/Msh6/Stat6/Cd180/Plcl2/Atad5/Foxp1/Malt1/Gpr183/Icosl/Rab27a/Relb/Ripk2/Ung/Exo1/Ccr2/Irf4/Slamf6/Cd28/Gapt	29
GO:0007076	mitotic chromosome condensation	8/1197	15/23210	2.27383e-07	5.92764e-06	4.20219e-06	Ncapd2/Smc4/Smc2/Nusap1/Ncapd3/Ncaph/Ncapg/Cdca5	8
GO:0051382	kinetochore assembly	8/1197	15/23210	2.27383e-07	5.92764e-06	4.20219e-06	Cenpc1/Cenpa/Cenpe/Cenpn/Cenpk/Cenph/Cenps/Cenpw	8
GO:0030218	erythrocyte differentiation	23/1197	131/23210	2.32449e-07	6.03001e-06	4.27477e-06	Zfp36/Epas1/Nckap1l/Sp1/Ptbp3/Sp3/Inpp5d/Mapk14/Hmgb2/Lyn/Sh2b3/Arid4a/Ets1/Lmo2/Rcor1/Spi1/Ikzf1/Cdk6/Ncapg2/Hcls1/Pknox1/Tal1/Lyar	23
GO:0042100	B cell proliferation	21/1197	112/23210	2.45701e-07	6.34268e-06	4.49642e-06	Nckap1l/Slc39a10/Inpp5d/Lyn/Mef2c/Atm/Ptprc/Cdkn1a/Cd180/Plcl2/Atad5/Sash3/Gpr183/Tnfrsf13b/Tlr9/Btk/Il7r/Cd79a/Ikzf3/Btla/Gapt	21
GO:0050867	positive regulation of cell activation	51/1197	461/23210	2.56863e-07	6.59864e-06	4.67788e-06	Sirpa/Nsd2/Vsir/Vcam1/Nckap1l/Slc39a10/Nfkbiz/Tgfbr2/Inpp5d/Mdk/Mef2c/Rps6ka1/Il6ra/Tgfb1/Dock8/Lyst/Paxip1/Efnb2/Ptprc/Syk/Ikzf1/Itgam/Hes1/Stat6/Cdkn1a/Pdgfb/Itgb2/Efnb1/Cd86/Ccdc88b/Atad5/Ptafr/Malt1/Blm/Sash3/Gpr183/Icosl/Il1rl2/Tlr9/Ripk2/Ceacam1/Il7r/Ccr2/Adora3/Capn3/Il2rg/Ulbp1/Btnl2/Raet1b/Cd28/Spta1	51
GO:0031055	chromatin remodeling at centromere	7/1197	11/23210	2.6214e-07	6.70167e-06	4.75092e-06	H3f3b/Hjurp/Nasp/Hells/Mis18a/Oip5/Cenpp	7
GO:0051785	positive regulation of nuclear division	17/1197	77/23210	2.99719e-07	7.62555e-06	5.40587e-06	Lrp5/Slf2/Tgfb1/Nusap1/Nup62/Pdgfb/Ube2c/Cenpe/Birc5/Cdt1/Sgo2a/Slf1/Fbxo5/Edn3/Cdca5/Met/Cd28	17
GO:0002703	regulation of leukocyte mediated immunity	34/1197	253/23210	3.21576e-07	8.1425e-06	5.77234e-06	Nsd2/Vsir/Lyn/Tgfb1/Paxip1/Tnfrsf1b/Ptprc/Syk/Itgam/Vav1/Ptpn6/Stat6/Itgb2/Rac2/Atad5/Ptafr/Was/Malt1/Sash3/Tlr9/Btk/Ceacam1/Il7r/Foxf1/Ccr2/Adora3/Ulbp1/Slamf6/Raet1a/Raet1b/Raet1c/Raet1d/H2-Q10/Cd28	34
GO:0030888	regulation of B cell proliferation	16/1197	69/23210	3.25948e-07	8.21388e-06	5.82294e-06	Nckap1l/Slc39a10/Inpp5d/Lyn/Mef2c/Atm/Ptprc/Cdkn1a/Atad5/Sash3/Gpr183/Tnfrsf13b/Tlr9/Btk/Ikzf3/Btla	16
GO:0045143	homologous chromosome segregation	15/1197	61/23210	3.34483e-07	8.31025e-06	5.89127e-06	Atm/Ndc1/Cenpc1/Espl1/Mre11a/Plk1/Brca2/Fancd2/Pttg1/Ccne2/Ccne1/Syce2/Trip13/Brip1/Tex15	15
GO:0045840	positive regulation of mitotic nuclear division	15/1197	61/23210	3.34483e-07	8.31025e-06	5.89127e-06	Lrp5/Slf2/Tgfb1/Nusap1/Nup62/Pdgfb/Ube2c/Cenpe/Birc5/Cdt1/Slf1/Edn3/Cdca5/Met/Cd28	15
GO:0002262	myeloid cell homeostasis	27/1197	176/23210	3.74119e-07	9.25159e-06	6.55859e-06	Zfp36/Epas1/Nckap1l/Sp1/Ptbp3/Sp3/Inpp5d/Mapk14/Hmgb2/Lyn/Sh2b3/Arid4a/Ets1/Pik3cd/Lmo2/Rcor1/Spi1/Ikzf1/Cdk6/Ncapg2/Hcls1/Pknox1/Bcl2l11/Tal1/Lyar/Fancc/Ccr2	27
GO:0050900	leukocyte migration	41/1197	340/23210	4.07851e-07	1.00388e-05	7.11668e-06	Lgmn/Sirpa/Cx3cr1/P2ry12/Adam10/Msn/Vcam1/Nckap1l/Cxadr/Selplg/Mapk14/Mdk/Lyn/Ano6/Mtus1/Tgfb1/Dock8/Cd34/Lyst/Camk1d/Pecam1/Syk/Itgam/Vav1/B4galt1/Pdgfb/Stk10/Itga4/Gcnt1/Itgb2/Rac2/Ptafr/Gpr183/Emilin1/Il16/Edn3/Itgb3/Ccr2/Adora3/Gpr35/Madcam1	41
GO:0090231	regulation of spindle checkpoint	8/1197	16/23210	4.34133e-07	1.05873e-05	7.50546e-06	Cdk5rap2/Ccnb1/Mad2l1/Anapc15/Cdt1/Aurka/Ndc80/Gen1	8
GO:0097329	response to antimetabolite	8/1197	16/23210	4.34133e-07	1.05873e-05	7.50546e-06	Fmr1/Cdk6/Timeless/Dhfr/Ddx11/Spidr/Blm/Rad51	8
GO:0032465	regulation of cytokinesis	17/1197	79/23210	4.42913e-07	1.07518e-05	7.62212e-06	Racgap1/Plk2/Prc1/Incenp/Nup62/Ect2/Cdc25b/Kif23/Plk1/Kif20a/Aurkb/Kif20b/Brca2/Kif14/Aurka/Cdc6/E2f7	17
GO:0030261	chromosome condensation	13/1197	47/23210	4.66206e-07	1.12292e-05	7.96056e-06	H3f3b/Top2a/Ncapd2/Smc4/Smc2/Ccnb1/Nusap1/Ncapd3/Cdk1/Ncapg2/Ncaph/Ncapg/Cdca5	13
GO:0032200	telomere organization	22/1197	126/23210	4.66823e-07	1.12292e-05	7.96056e-06	H3f3b/Hnrnpd/Pcna/Ctc1/Rpa1/Dcp2/Atm/Mre11a/Rad50/Tinf2/Aurkb/Brca2/Rpa2/Blm/Nek2/Dna2/Pif1/Ccne2/Rad51/Recql4/Ccne1/Rad51c	22
GO:0030217	T cell differentiation	35/1197	269/23210	4.75179e-07	1.13785e-05	8.06639e-06	Egr1/Zfp36l2/Vsir/Nckap1l/Nfkbiz/Sp3/Tgfbr2/Mdk/Tgfb1/Dock2/Nfatc3/Ptprc/Syk/Ikzf1/Cdk6/Vav1/Stat6/Pknox1/Foxp1/Fanca/Tcf7/Malt1/Blm/Sash3/Fancd2/Gpr183/Il1rl2/Relb/Ripk2/Il7r/Ccr2/Irf4/Il2rg/Slamf6/Cd28	35
GO:0010971	positive regulation of G2/M transition of mitotic cell cycle	10/1197	27/23210	4.83357e-07	1.15222e-05	8.16825e-06	Ccnd1/Lmnb1/Ccnb1/Cdk1/Cdc25b/Dtl/Cdc25c/Fbxo5/Rad51c/Rad51b	10
GO:0046633	alpha-beta T cell proliferation	12/1197	40/23210	4.87827e-07	1.15766e-05	8.20682e-06	Vsir/Tgfbr2/Dock2/Ptprc/Syk/Elf4/Blm/Ripk2/Ceacam1/Ccr2/Cd28/Btla	12
GO:0042102	positive regulation of T cell proliferation	19/1197	98/23210	5.30291e-07	1.24724e-05	8.84191e-06	Vcam1/Nckap1l/Tgfbr2/Il6ra/Ptprc/Syk/Hes1/Efnb1/Cd86/Ccdc88b/Blm/Sash3/Icosl/Ripk2/Ceacam1/Ccr2/Btnl2/Cd28/Spta1	19
GO:0002312	B cell activation involved in immune response	17/1197	80/23210	5.35643e-07	1.25426e-05	8.89162e-06	Nsd2/Tgfb1/Dock11/Paxip1/Rnf168/Ptprc/Msh6/Stat6/Cd180/Plcl2/Atad5/Gpr183/Icosl/Ung/Exo1/Cd28/Gapt	17
GO:0030316	osteoclast differentiation	20/1197	108/23210	5.81386e-07	1.35537e-05	9.60844e-06	Fos/Csf1r/Junb/Trf/Inpp5d/Mapk14/Sh3pxd2a/Tgfb1/Tmem64/Nfatc1/Ubash3b/Klf10/Inpp4b/Lrrk1/Gpr183/Tnfrsf11a/Epha2/Ceacam1/Itgb3/Efna4	20
GO:0051988	regulation of attachment of spindle microtubules to kinetochore	7/1197	12/23210	6.00985e-07	1.39492e-05	9.88878e-06	Racgap1/Ccnb1/Knstrn/Cenpe/Spag5/Ect2/Nek2	7
GO:1902806	regulation of cell cycle G1/S phase transition	22/1197	128/23210	6.17855e-07	1.42781e-05	1.0122e-05	Ccnd1/Ccnd2/Gas1/Rfwd3/Ptpn6/Cdkn1a/Rbl1/Jade1/Larp7/Dact1/Dbf4/Rpa2/Kif14/Mtbp/E2f1/Fam83d/Cdc45/Pidd1/E2f7/Ccne1/Haspin/Cdkn2b	22
GO:0050678	regulation of epithelial cell proliferation	42/1197	358/23210	6.21217e-07	1.42934e-05	1.01328e-05	Sparc/Zfp36/Jun/Ccnd1/Tgfbr1/Ccnd2/Lims1/Sp1/Dab2ip/Cxadr/Mdk/Hmgb2/Mef2c/Gas1/Suz12/Esr1/Tgfb1/Uhrf1/Cflar/Tek/Sav1/Efnb2/Itpr1/Cdk6/Rreb1/Aplnr/Hes1/B4galt1/Pdgfb/Itga4/Iqgap3/Tinf2/Foxp1/Birc5/Brca2/Bmp6/Sfrp2/Ceacam1/Bmp5/Itgb3/Cdh3/Cdkn2b	42
GO:0045639	positive regulation of myeloid cell differentiation	19/1197	99/23210	6.2485e-07	1.43148e-05	1.01479e-05	Fos/Csf1r/Jun/Nckap1l/Inpp5d/Mapk14/Hmgb2/Trib1/Ets1/Tgfb1/Jag1/Tmem64/Rcor1/Ikzf1/Hcls1/Klf10/Casp8/Tal1/Itgb3	19
GO:0042770	signal transduction in response to DNA damage	18/1197	90/23210	6.49194e-07	1.48083e-05	1.04979e-05	Mapk14/Zfp385a/Cdc5l/Atm/Foxm1/Cdkn1a/Sesn2/Plk1/Atad5/Brca2/Dtl/Chek1/Chek2/Pidd1/E2f7/Pmaip1/Tfap4/Stk33	18
GO:0001819	positive regulation of cytokine production	49/1197	449/23210	6.57981e-07	1.49444e-05	1.05943e-05	Csf1r/Egr1/Unc93b1/Rock2/Mapk14/Atp6ap2/Mdk/Hmgb2/Akap12/Ifngr1/Ccr5/Sema7a/Heg1/Il6ra/Tgfb1/Cd34/Tek/Ptprc/Syk/Nfam1/Tlr7/Ccdc88b/Ptafr/Casp8/Tmem173/Cyp1b1/Malt1/Sash3/Icosl/Il1rl2/Tlr9/Postn/Ripk2/Tlr1/Ccbe1/Ticam2/Clec5a/Cgas/Hspb1/Lum/Ccr2/Irf4/Nlrp1b/Ulbp1/Slamf6/Btnl2/Raet1b/Cd28/Cd2	49
GO:0007063	regulation of sister chromatid cohesion	9/1197	22/23210	6.76803e-07	1.53062e-05	1.08508e-05	Rad21/Slf2/Fen1/Bub1/Ddx11/Sgo2a/Slf1/Recql4/Cdca5	9
GO:0002274	myeloid leukocyte activation	30/1197	215/23210	7.00546e-07	1.57089e-05	1.11362e-05	Jun/Cx3cr1/Adam10/Nampt/Tgfbr2/Lyn/Ifngr1/Atm/Tgfb1/Dock2/Syk/Spi1/Itgam/Tlr7/Myo1f/Itgb2/Rac2/Lcp2/Ptafr/Tlr9/Btk/Relb/Tlr1/Enpp3/Foxf1/Ccr2/Adora3/Irf4/Ulbp1/Raet1b	30
GO:1904018	positive regulation of vasculature development	29/1197	204/23210	7.2288e-07	1.61413e-05	1.14428e-05	Egr1/Rhob/Cx3cr1/Sp1/Adam12/Btg1/Tgfbr2/Mdk/Plk2/Il6ra/Ctsh/Ets1/Map3k3/Cd34/Cflar/Tek/Efnb2/Aplnr/Pdgfb/Itgb2/Cyp1b1/Rras/Sfrp2/Cysltr1/Ceacam1/Itgb3/Ccbe1/Hspb1/Adm	29
GO:0007163	establishment or maintenance of cell polarity	30/1197	216/23210	7.74141e-07	1.72133e-05	1.22027e-05	Rhob/Myh9/Msn/Rap1b/Lims1/Spry1/Nckap1l/Exoc4/Rhoq/Cdk5rap2/Dock8/Dock2/Tek/Cyth3/Hes1/Parvg/Cenpa/Lama1/Spag5/Mad2l1/Plk1/Cap2/Kif2c/Wee1/Kif20b/BC034090/Ndc80/Sh3bp1/Spdl1/Foxf1	30
GO:0002381	immunoglobulin production involved in immunoglobulin mediated immune response	15/1197	65/23210	8.0987e-07	1.78576e-05	1.26595e-05	Nsd2/Tgfb1/Paxip1/Rnf168/Ptprc/Pou2f2/Msh6/Stat6/Atad5/Icosl/Btk/Ung/Exo1/Cd28/Gapt	15
GO:0033627	cell adhesion mediated by integrin	15/1197	65/23210	8.0987e-07	1.78576e-05	1.26595e-05	P2ry12/Itgb5/Nckap1l/Lyn/Piezo1/Syk/Ptpn6/Npnt/Itga4/Itgb2/Cyp1b1/Epha2/Ret/Lpxn/Itgb3	15
GO:0008156	negative regulation of DNA replication	11/1197	35/23210	8.70206e-07	1.91084e-05	1.35463e-05	Smc1a/Smc3/Msh6/Mre11a/Timeless/Tipin/Brca2/Donson/Fbxo5/Chek2/Gmnn	11
GO:0045862	positive regulation of proteolysis	39/1197	325/23210	8.79117e-07	1.92243e-05	1.36284e-05	Lgmn/Picalm/Myh9/Vsir/Rock2/Fmr1/Dab2ip/Asph/Mapk14/Edem1/Lyn/Trib1/Plk2/Ctsh/Herpud1/Tnfrsf1b/Syk/Apaf1/Casp8ap2/Plk1/Cln6/Casp8/Bcl2l11/Malt1/Sfrp2/Ecscr/Bbc3/Aurka/Cbfa2t3/Disc1/Ripk2/Pidd1/Ret/Pmaip1/Ccbe1/Tfap4/P2rx1/Capn3/Nlrp1b	39
GO:0046849	bone remodeling	19/1197	102/23210	1.00807e-06	2.19534e-05	1.55631e-05	Csf1r/Ctss/Trf/Tmem119/Inpp5d/Lrp5/Mdk/Tmem64/Syk/Ubash3b/Rac2/Inpp4b/Lrrk1/Tnfrsf11a/Enpp1/Epha2/Ceacam1/Itgb3/Efna4	19
GO:0010332	response to gamma radiation	13/1197	50/23210	1.01789e-06	2.20638e-05	1.56413e-05	Egr1/H2afx/Atm/Ptprc/Tmem109/Cdkn1a/Map3k20/Xrcc2/Brca2/Fancd2/Apobec1/Chek2/Ddias	13
GO:0034101	erythrocyte homeostasis	23/1197	142/23210	1.02147e-06	2.20638e-05	1.56413e-05	Zfp36/Epas1/Nckap1l/Sp1/Ptbp3/Sp3/Inpp5d/Mapk14/Hmgb2/Lyn/Sh2b3/Arid4a/Ets1/Lmo2/Rcor1/Spi1/Ikzf1/Cdk6/Ncapg2/Hcls1/Pknox1/Tal1/Lyar	23
GO:0002200	somatic diversification of immune receptors	16/1197	75/23210	1.08784e-06	2.34018e-05	1.65899e-05	Nsd2/Atm/Tgfb1/Paxip1/Rnf168/Ptprc/Msh6/Stat6/Atad5/Foxp1/Tcf7/Icosl/Polq/Ung/Exo1/Cd28	16
GO:0061351	neural precursor cell proliferation	27/1197	186/23210	1.14186e-06	2.44644e-05	1.73432e-05	Cx3cr1/Plxnb2/Pou3f3/Btg2/Flna/Trf/Sall1/Lims1/Tacc1/Racgap1/Afdn/Mdk/Lyn/Ccr5/Aspm/Tgfb1/Daglb/Akna/Tacc3/Cip2a/Cdon/Dct/Kif14/Melk/Shcbp1/Disc1/Hhex	27
GO:0002562	somatic diversification of immune receptors via germline recombination within a single locus	15/1197	67/23210	1.2256e-06	2.60477e-05	1.84656e-05	Nsd2/Atm/Tgfb1/Paxip1/Rnf168/Ptprc/Msh6/Stat6/Atad5/Foxp1/Tcf7/Icosl/Ung/Exo1/Cd28	15
GO:0016444	somatic cell DNA recombination	15/1197	67/23210	1.2256e-06	2.60477e-05	1.84656e-05	Nsd2/Atm/Tgfb1/Paxip1/Rnf168/Ptprc/Msh6/Stat6/Atad5/Foxp1/Tcf7/Icosl/Ung/Exo1/Cd28	15
GO:0002696	positive regulation of leukocyte activation	48/1197	446/23210	1.27153e-06	2.69158e-05	1.9081e-05	Sirpa/Nsd2/Vsir/Vcam1/Nckap1l/Slc39a10/Nfkbiz/Tgfbr2/Inpp5d/Mdk/Mef2c/Il6ra/Tgfb1/Dock8/Lyst/Paxip1/Efnb2/Ptprc/Syk/Ikzf1/Itgam/Hes1/Stat6/Cdkn1a/Itgb2/Efnb1/Cd86/Ccdc88b/Atad5/Ptafr/Malt1/Blm/Sash3/Gpr183/Icosl/Il1rl2/Tlr9/Ripk2/Ceacam1/Il7r/Ccr2/Adora3/Il2rg/Ulbp1/Btnl2/Raet1b/Cd28/Spta1	48
GO:0051251	positive regulation of lymphocyte activation	44/1197	394/23210	1.3086e-06	2.75901e-05	1.9559e-05	Sirpa/Nsd2/Vsir/Vcam1/Nckap1l/Slc39a10/Nfkbiz/Tgfbr2/Inpp5d/Mdk/Mef2c/Il6ra/Tgfb1/Dock8/Lyst/Paxip1/Efnb2/Ptprc/Syk/Ikzf1/Hes1/Stat6/Cdkn1a/Efnb1/Cd86/Ccdc88b/Atad5/Malt1/Blm/Sash3/Gpr183/Icosl/Il1rl2/Tlr9/Ripk2/Ceacam1/Il7r/Ccr2/Il2rg/Ulbp1/Btnl2/Raet1b/Cd28/Spta1	44
GO:0000723	telomere maintenance	21/1197	124/23210	1.4182e-06	2.96722e-05	2.10351e-05	Hnrnpd/Pcna/Ctc1/Rpa1/Dcp2/Atm/Mre11a/Rad50/Tinf2/Aurkb/Brca2/Rpa2/Blm/Nek2/Dna2/Pif1/Ccne2/Rad51/Recql4/Ccne1/Rad51c	21
GO:2000045	regulation of G1/S transition of mitotic cell cycle	20/1197	114/23210	1.41857e-06	2.96722e-05	2.10351e-05	Ccnd1/Ccnd2/Rfwd3/Ptpn6/Cdkn1a/Rbl1/Jade1/Larp7/Dact1/Dbf4/Rpa2/Kif14/Mtbp/E2f1/Cdc45/Pidd1/E2f7/Ccne1/Haspin/Cdkn2b	20
GO:0006323	DNA packaging	28/1197	200/23210	1.52268e-06	3.17245e-05	2.249e-05	H3f3b/Dnmt1/Hjurp/Top2a/Ncapd2/Nasp/Smchd1/Smc4/Mcm2/Smc2/Ccnb1/Nusap1/Ncapd3/Cdk1/Ncapg2/Ncaph/Resf1/Chaf1a/Hat1/Ncapg/Hells/Mis18a/Apobec1/Chaf1b/Asf1b/Cdca5/Oip5/Cenpp	28
GO:0043405	regulation of MAP kinase activity	36/1197	295/23210	1.54202e-06	3.20014e-05	2.26863e-05	Trf/Tgfbr1/Akap13/Dusp6/Spry1/Bmp7/Grm5/Dab2ip/Iqgap1/Lyn/Trib1/Sh2b3/Rgs2/Tgfb1/Tiam1/Ptprc/Syk/Pik3cg/Magi3/Ptpn6/Nup62/Pdgfb/Iqgap3/Map3k20/Tnfrsf11a/Pik3r5/Mdfic/Sfrp2/Tlr9/Ripk2/Ret/Edn3/Ceacam1/Met/Map4k1/Lpar2	36
GO:0030198	extracellular matrix organization	34/1197	271/23210	1.59668e-06	3.30064e-05	2.33988e-05	Pdgfra/Mmp15/Lamc1/Ctss/Tgfbr1/Eln/Plod1/Pmp22/Lcp1/Col18a1/Vwa1/Qsox1/Col5a2/Ets1/Tgfb1/Cflar/Tnfrsf1b/Fbln5/Npnt/Phldb2/B4galt1/Aebp1/Prdx4/Vit/Col23a1/Itga8/Cyp1b1/Sfrp2/Emilin1/Postn/Col2a1/Itgb3/Lum/Foxf1	34
GO:0051056	regulation of small GTPase mediated signal transduction	33/1197	259/23210	1.60446e-06	3.30381e-05	2.34212e-05	Rasa3/Akap13/Spry1/Spata13/Cyth4/Dab2ip/Cd2ap/Sipa1/Bnip2/Stmn1/Heg1/Foxm1/Tiam1/Cgnl1/Dock2/Arhgap19/Vav1/Cyth3/Arhgef6/Arhgdib/Nup62/Ect2/Cdon/Kif14/Lpar6/Sh3bp1/Psd4/Arhgef39/Met/Gpr35/Lpar2/P2ry10b/Ccdc125	33
GO:0007064	mitotic sister chromatid cohesion	9/1197	24/23210	1.61983e-06	3.31277e-05	2.34848e-05	Smc1a/Slf2/Cdc20/Pttg1/Slf1/Sgo1/Cdca5/Haspin/Dscc1	9
GO:0061756	leukocyte adhesion to vascular endothelial cell	11/1197	37/23210	1.62133e-06	3.31277e-05	2.34848e-05	Cx3cr1/Vcam1/Selplg/Mdk/Ets1/Itga4/Gcnt1/Itgb2/Ptafr/Ccr2/Madcam1	11
GO:0046635	positive regulation of alpha-beta T cell activation	15/1197	69/23210	1.82367e-06	3.68353e-05	2.61131e-05	Nckap1l/Nfkbiz/Tgfbr2/Il6ra/Ptprc/Syk/Ikzf1/Malt1/Blm/Sash3/Ripk2/Ceacam1/Ccr2/Il2rg/Cd28	15
GO:0048146	positive regulation of fibroblast proliferation	15/1197	69/23210	1.82367e-06	3.68353e-05	2.61131e-05	Pdgfra/Jun/Rps3a1/Ccna2/Ctc1/Esr1/Tgfb1/Fndc3b/Ccnb1/Cdk6/Cdkn1a/Pdgfb/E2f1/Cdc6/Itgb3	15
GO:0007265	Ras protein signal transduction	45/1197	414/23210	2.07726e-06	4.17979e-05	2.96312e-05	Jun/Rhob/Rasa3/Dnmt1/Wasf2/Akap13/Rap1b/Spry1/Rab8b/Rock2/Rhoq/Spata13/Cyth4/Dab2ip/Plk2/Stmn1/Heg1/Rasgrp3/Foxm1/Tiam1/Dock2/Pecam1/Vav1/Cyth3/Arhgef6/Arhgdib/Nup62/Baiap2/Ect2/Rac2/Iqgap3/Was/Rab32/Kif14/Rras/Lpar6/Rab27a/Psd4/Arhgef39/Rab39/Met/Gpr35/Lpar2/P2ry10b/Ccdc125	45
GO:0048145	regulation of fibroblast proliferation	19/1197	107/23210	2.14151e-06	4.29275e-05	3.04319e-05	Pdgfra/Jun/Rps3a1/Dab2ip/Ccna2/Ctc1/Esr1/Trp53inp1/Tgfb1/Fndc3b/Morc3/Ccnb1/Cdk6/Cdkn1a/Pdgfb/E2f1/Cdc6/Pmaip1/Itgb3	19
GO:0006284	base-excision repair	11/1197	38/23210	2.17587e-06	4.34517e-05	3.08036e-05	Pcna/Rpa1/Lig1/Pold1/Pole/Hmga1/Rpa2/Dna2/Polq/Neil3/Ung	11
GO:0042129	regulation of T cell proliferation	25/1197	170/23210	2.21263e-06	4.40196e-05	3.12062e-05	Vsir/Vcam1/Nckap1l/Tgfbr2/Il6ra/Tgfb1/Tnfrsf1b/Ptprc/Syk/Ptpn6/Hes1/Rac2/Efnb1/Cd86/Ccdc88b/Blm/Sash3/Icosl/Ripk2/Ceacam1/Ccr2/Btnl2/Cd28/Spta1/Btla	25
GO:0031032	actomyosin structure organization	28/1197	204/23210	2.26513e-06	4.48954e-05	3.1827e-05	Pdgfra/Tpm1/Myh9/Myh10/Tgfbr1/Itgb5/Wasf2/Eln/Akap13/Mef2a/Rock2/Evl/Racgap1/Zyx/Mef2c/Stmn1/Cflar/Phldb2/Ect2/Anln/Kif23/Foxp1/Was/Tmod1/Kank4/Synpo/Met/Capn3	28
GO:0090266	regulation of mitotic cell cycle spindle assembly checkpoint	7/1197	14/23210	2.37666e-06	4.65826e-05	3.30231e-05	Cdk5rap2/Ccnb1/Mad2l1/Anapc15/Cdt1/Ndc80/Gen1	7
GO:1903504	regulation of mitotic spindle checkpoint	7/1197	14/23210	2.37666e-06	4.65826e-05	3.30231e-05	Cdk5rap2/Ccnb1/Mad2l1/Anapc15/Cdt1/Ndc80/Gen1	7
GO:0022612	gland morphogenesis	23/1197	150/23210	2.70125e-06	5.27492e-05	3.73947e-05	Mki67/Msn/Lims1/Bmp7/Tgfbr2/Lrp5/Mdk/Esr1/Rps6ka1/Tgfb1/Cflar/Itpr1/Stat6/B4galt1/Pdgfb/Lama1/Sema3c/Epha2/Ceacam1/Met/Plag1/Pthlh/Rln1	23
GO:0048144	fibroblast proliferation	19/1197	109/23210	2.85386e-06	5.55243e-05	3.9362e-05	Pdgfra/Jun/Rps3a1/Dab2ip/Ccna2/Ctc1/Esr1/Trp53inp1/Tgfb1/Fndc3b/Morc3/Ccnb1/Cdk6/Cdkn1a/Pdgfb/E2f1/Cdc6/Pmaip1/Itgb3	19
GO:0031572	G2 DNA damage checkpoint	10/1197	32/23210	2.91827e-06	5.65696e-05	4.01031e-05	Ccng1/Atm/Cdk1/Mre11a/Plk1/Dtl/Clspn/Blm/Donson/Chek1	10
GO:0060562	epithelial tube morphogenesis	42/1197	380/23210	2.9504e-06	5.69836e-05	4.03965e-05	Pdgfra/Rhob/Plxnb2/Sall1/Spry1/Lmo4/Rock2/Bmp7/Tgfbr2/Lrp5/Vasp/Mdk/Mef2c/Esr1/Ctsh/Tgfb1/Tek/Nfatc3/Efnb2/Nfatc1/Hes1/Npnt/B4galt1/Apaf1/Lama1/Timeless/Casp8/Kif20b/Sfrp2/Fmn1/Hhex/Stil/Epha2/Ret/Bmp5/Lgr5/Met/Wnt6/Foxf1/Adm/Tbx6/Pthlh	42
GO:0032875	regulation of DNA endoreduplication	6/1197	10/23210	3.26224e-06	6.27773e-05	4.45038e-05	Smc1a/Smc3/Msh6/Mre11a/Fbxo5/E2f7	6
GO:0001933	negative regulation of protein phosphorylation	44/1197	408/23210	3.30532e-06	6.33759e-05	4.49281e-05	Actb/Jun/Sirpa/Ppp1r15a/Dusp6/Spry1/Bmp7/Dab2ip/Dnajc10/Igfbp3/Inpp5f/Lrp5/Lyn/Trib1/Sh2b3/Rgs2/Suz12/Heg1/Tgfb1/Foxm1/Pecam1/Ccnb1/Ptprc/Ptpn6/Cdkn2c/Nup62/Cdkn1a/Ubash3b/Pbk/Ldlrad4/Plk1/Dact1/Lrrk1/Mvp/Sfrp2/Emilin1/Enpp1/Prr5l/Hhex/Ceacam1/Tfap4/Samsn1/Met/Hspb1	44
GO:0072012	glomerulus vasculature development	9/1197	26/23210	3.52488e-06	6.73417e-05	4.77395e-05	Pdgfra/Egr1/Bmp7/Il6ra/Cflar/Tek/Hes1/Pdgfb/Itgb3	9
GO:0001889	liver development	20/1197	121/23210	3.69468e-06	7.03319e-05	4.98593e-05	Jun/Ccnd1/Mki67/Lims1/Sp1/Sp3/Mdk/Rps6ka1/Foxm1/Cflar/Frzb/Itpr1/Man2a1/Hes1/Aurka/Hhex/E2f7/Ceacam1/Met/Rarb	20
GO:0007131	reciprocal meiotic recombination	12/1197	48/23210	4.14826e-06	7.86831e-05	5.57797e-05	Top2a/Topbp1/Chtf18/Rad54l/Rad51/Trip13/Rad54b/Psmc3ip/Brip1/Rad51c/Eme1/Cenps	12
GO:0046632	alpha-beta T cell differentiation	19/1197	112/23210	4.32835e-06	8.18058e-05	5.79933e-05	Nckap1l/Nfkbiz/Tgfbr2/Tgfb1/Syk/Ikzf1/Stat6/Foxp1/Tcf7/Malt1/Blm/Sash3/Gpr183/Relb/Ripk2/Ccr2/Irf4/Il2rg/Slamf6	19
GO:0016445	somatic diversification of immunoglobulins	14/1197	65/23210	4.49958e-06	8.47395e-05	6.00731e-05	Nsd2/Tgfb1/Paxip1/Rnf168/Ptprc/Msh6/Stat6/Atad5/Foxp1/Icosl/Polq/Ung/Exo1/Cd28	14
GO:0097327	response to antineoplastic agent	15/1197	74/23210	4.60616e-06	8.6439e-05	6.12779e-05	Egr1/Hnrnpd/Adam15/Fmr1/Tgfb1/Cdk6/Pdgfb/Timeless/Dhfr/Ddx11/Spidr/Blm/Rad51/Tfap4/Map4k1	15
GO:0042060	wound healing	40/1197	361/23210	4.74324e-06	8.8697e-05	6.28786e-05	Pdgfra/P2ry12/Flna/Tpm1/Myh9/Myh10/Evl/Entpd1/Cxadr/Mapk14/Mdk/Lyn/Bcl9/Sh2b3/Ano6/Tgfb1/Pros1/Cd34/Cflar/Lyst/Pecam1/Elk3/Syk/Rreb1/Ptpn6/Phldb2/B4galt1/Cdkn1a/Pdgfb/Ubash3b/Prcp/Sdc1/Rab27a/Tfpi/Ceacam1/Itgb3/Procr/P2rx1/Ccr2/Capn3	40
GO:0043254	regulation of protein-containing complex assembly	44/1197	414/23210	4.82944e-06	8.99909e-05	6.37959e-05	H3f3b/P2ry12/Tpm1/Hjurp/Msn/Cotl1/Eln/Lmo4/Nckap1l/Cdk5rap2/Evl/Dab2ip/Lcp1/Vasp/Stmn1/Esr1/Atm/Slf2/Tgfb1/Clip1/Piezo1/Pecam1/Syk/Ikzf1/Hcls1/Ldlrad4/Baiap2/Dact1/Bmf/Spidr/Cdt1/Was/Bcl2l11/Kif14/Tmod1/Tal1/Slf1/Psrc1/Bbc3/Fmn1/Kank4/Met/Lefty1/Spta1	44
GO:0061437	renal system vasculature development	9/1197	27/23210	5.04564e-06	9.30366e-05	6.59551e-05	Pdgfra/Egr1/Bmp7/Il6ra/Cflar/Tek/Hes1/Pdgfb/Itgb3	9
GO:0061440	kidney vasculature development	9/1197	27/23210	5.04564e-06	9.30366e-05	6.59551e-05	Pdgfra/Egr1/Bmp7/Il6ra/Cflar/Tek/Hes1/Pdgfb/Itgb3	9
GO:0035825	homologous recombination	12/1197	49/23210	5.23731e-06	9.59025e-05	6.79867e-05	Top2a/Topbp1/Chtf18/Rad54l/Rad51/Trip13/Rad54b/Psmc3ip/Brip1/Rad51c/Eme1/Cenps	12
GO:0045646	regulation of erythrocyte differentiation	12/1197	49/23210	5.23731e-06	9.59025e-05	6.79867e-05	Zfp36/Nckap1l/Inpp5d/Mapk14/Hmgb2/Lyn/Ets1/Lmo2/Spi1/Cdk6/Ncapg2/Tal1	12
GO:0007292	female gamete generation	22/1197	145/23210	5.27238e-06	9.62118e-05	6.8206e-05	H3f3b/Hexb/Top2a/Mdk/Atm/Aspm/Nrip1/Ccnb1/Diaph2/Ncaph/Cdc25b/Plk1/Brca2/Sgo2a/Ttk/Aurka/Mastl/Fbxo5/Lgr5/Mcm8/Trip13/Rad51c	22
GO:0061008	hepaticobiliary system development	20/1197	124/23210	5.43196e-06	9.87833e-05	7.0029e-05	Jun/Ccnd1/Mki67/Lims1/Sp1/Sp3/Mdk/Rps6ka1/Foxm1/Cflar/Frzb/Itpr1/Man2a1/Hes1/Aurka/Hhex/E2f7/Ceacam1/Met/Rarb	20
GO:0046634	regulation of alpha-beta T cell activation	18/1197	104/23210	5.74074e-06	0.000104041	7.37563e-05	Vsir/Nckap1l/Nfkbiz/Tgfbr2/Il6ra/Tgfb1/Ptprc/Syk/Ikzf1/Malt1/Blm/Sash3/Ripk2/Ceacam1/Ccr2/Il2rg/Cd28/Btla	18
GO:0061572	actin filament bundle organization	24/1197	168/23210	5.85648e-06	0.000105776	7.49864e-05	Rhob/Flna/Tpm1/Myh10/Actn4/Tgfbr1/Itgb5/Wasf2/Eln/Rock2/Evl/Lcp1/Zyx/Stmn1/Myo1b/Phldb2/Rflnb/Baiap2/Was/Kank4/Synpo/Met/Rflna/Espn	24
GO:0016447	somatic recombination of immunoglobulin gene segments	13/1197	58/23210	6.16258e-06	0.00011055	7.83708e-05	Nsd2/Tgfb1/Paxip1/Rnf168/Ptprc/Msh6/Stat6/Atad5/Foxp1/Icosl/Ung/Exo1/Cd28	13
GO:0032835	glomerulus development	13/1197	58/23210	6.16258e-06	0.00011055	7.83708e-05	Pdgfra/Egr1/Basp1/Bmp7/Mef2c/Il6ra/Jag1/Cflar/Tek/Hes1/Pdgfb/Ret/Itgb3	13
GO:0045740	positive regulation of DNA replication	11/1197	42/23210	6.40022e-06	0.00011404	8.08449e-05	Jun/Pcna/Ctc1/Cdk2/Cdk1/Atad5/Dbf4/Cdt1/Dna2/E2f7/Met	11
GO:0090224	regulation of spindle organization	11/1197	42/23210	6.40022e-06	0.00011404	8.08449e-05	Smc1a/Smc3/Stag1/Tpx2/Tacc3/Nup62/Spag5/Plk1/Bora/Psrc1/Ccsap	11
GO:0042023	DNA endoreduplication	6/1197	11/23210	6.86235e-06	0.000121457	8.61025e-05	Smc1a/Smc3/Msh6/Mre11a/Fbxo5/E2f7	6
GO:0045876	positive regulation of sister chromatid cohesion	6/1197	11/23210	6.86235e-06	0.000121457	8.61025e-05	Rad21/Slf2/Fen1/Ddx11/Sgo2a/Slf1	6
GO:0019985	translesion synthesis	7/1197	16/23210	7.23084e-06	0.000127552	9.04235e-05	Pcna/Pclaf/Polh/Dtl/Polk/Primpol/Pole2	7
GO:0021987	cerebral cortex development	18/1197	106/23210	7.57004e-06	0.000133092	9.43508e-05	Cx3cr1/Pou3f3/P2ry12/Srgap2/Tra2b/Zbtb18/Mboat7/Dab2ip/Tacc1/Sun2/Afdn/Mdk/Aspm/Tacc3/Cdon/Wdr62/Kif14/Disc1	18
GO:0045619	regulation of lymphocyte differentiation	25/1197	182/23210	7.6569e-06	0.000134173	9.51174e-05	Zfp36l2/Vsir/Nckap1l/Nfkbiz/Tgfbr2/Inpp5d/Mdk/Tgfb1/Ptprc/Syk/Ikzf1/Nfam1/Ptpn6/Fanca/Malt1/Sash3/Fancd2/Il1rl2/Tlr9/Ripk2/Il7r/Ccr2/Il2rg/Ikzf3/Cd28	25
GO:0002697	regulation of immune effector process	44/1197	422/23210	7.8807e-06	0.000137639	9.75744e-05	Nsd2/Vsir/Cfh/Nfkbiz/Mapk14/Lyn/Sema7a/Tgfb1/Paxip1/Tek/Tnfrsf1b/Ptprc/Syk/Itgam/Vav1/Ptpn6/Stat6/Itgb2/Rac2/Atad5/Ptafr/Foxp1/Tmem173/Was/Malt1/Sash3/Tlr9/Btk/Ripk2/Enpp3/Ceacam1/Il7r/Cgas/Foxf1/Ccr2/Adora3/Ulbp1/Slamf6/Raet1a/Raet1b/Raet1c/Raet1d/H2-Q10/Cd28	44
GO:0046599	regulation of centriole replication	8/1197	22/23210	8.16875e-06	0.000141325	0.000100188	Cdk5rap2/Plk2/Cep192/Nup62/Plk4/Mdm1/Cenpj/Stil	8
GO:0046641	positive regulation of alpha-beta T cell proliferation	8/1197	22/23210	8.16875e-06	0.000141325	0.000100188	Tgfbr2/Ptprc/Syk/Blm/Ripk2/Ceacam1/Ccr2/Cd28	8
GO:0030010	establishment of cell polarity	21/1197	138/23210	8.17187e-06	0.000141325	0.000100188	Myh9/Msn/Rap1b/Spry1/Exoc4/Cdk5rap2/Dock8/Dock2/Cyth3/Hes1/Cenpa/Lama1/Spag5/Mad2l1/Plk1/Wee1/Kif20b/Ndc80/Sh3bp1/Spdl1/Foxf1	21
GO:0018105	peptidyl-serine phosphorylation	36/1197	318/23210	8.66322e-06	0.000149335	0.000105866	Tgfbr1/Ppp1r15a/Rock2/Tgfbr2/Inpp5f/Mapk14/Mknk2/Plk2/Atm/Tgfb1/Morc3/Tek/Cdk2/Ccnb1/Syk/Cdk1/Hcls1/Pdgfb/Pbk/Vrk1/Plcl2/Plk1/Stk32b/Aurkb/Clspn/Ttk/Sfrp2/Mastl/Ripk2/Chek2/Ret/Mapkapk3/Vrk2/Met/Pkn3/Map4k1	36
GO:0060348	bone development	29/1197	231/23210	9.00175e-06	0.000154166	0.000109291	Sparc/Nsd2/Wasf2/Akap13/Tmem119/Tgfbr2/Lrp5/Pip4k2a/Zfp385a/Mef2c/Ctc1/Sh2b3/Ano6/Vwa1/Ptprc/Ptpn6/Rflnb/Nab2/Vit/Fli1/Tifab/Lrrk1/Bmp6/Tal1/Sfrp2/Col2a1/Rarb/Rflna/Pthlh	29
GO:0034644	cellular response to UV	15/1197	78/23210	9.08995e-06	0.000155174	0.000110005	Fmr1/Pcna/Trp53inp1/N4bp1/Rnf168/Pold1/Cdkn1a/Pbk/Pold3/Aurkb/Bmf/Polh/Polk/Chek1/Ddias	15
GO:0042326	negative regulation of phosphorylation	46/1197	452/23210	9.31569e-06	0.000158516	0.000112375	Actb/Jun/Sirpa/Ppp1r15a/Dusp6/Spry1/Bmp7/Dab2ip/Dnajc10/Igfbp3/Inpp5f/Lrp5/Lyn/Trib1/Sh2b3/Rgs2/Suz12/Heg1/Tgfb1/Foxm1/Pecam1/Ccnb1/Ptprc/Ptpn6/Cdkn2c/Nup62/Cdkn1a/Ubash3b/Pbk/Ldlrad4/Plk1/Dact1/Lrrk1/Mvp/Sfrp2/Emilin1/Enpp1/Cbfa2t3/Prr5l/Hhex/Ceacam1/Tfap4/Samsn1/Met/Hspb1/Cdkn2b	46
GO:0001655	urogenital system development	38/1197	346/23210	9.9701e-06	0.000169108	0.000119883	Pdgfra/Egr1/Pou3f3/Basp1/Tgfbr1/Sall1/Spry1/Bmp7/Mef2c/Odc1/Cenpf/Esr1/Il6ra/Tgfb1/Jag1/Cflar/Tek/Efnb2/Hes1/Npnt/Pdgfb/Gcnt1/Nup107/Itga8/Timeless/Hells/Bcl2l11/Bmp6/Fmn1/Cep55/Ret/Itgb3/Lgr5/Rarb/Wnt6/Foxf1/Plag1/Rln1	38
GO:0010952	positive regulation of peptidase activity	23/1197	162/23210	1.0091e-05	0.000170613	0.00012095	Lgmn/Picalm/Vsir/Rock2/Asph/Mapk14/Lyn/Ctsh/Syk/Apaf1/Casp8ap2/Casp8/Bcl2l11/Malt1/Sfrp2/Bbc3/Ripk2/Pidd1/Ret/Pmaip1/Tfap4/P2rx1/Nlrp1b	23
GO:0090192	regulation of glomerulus development	7/1197	17/23210	1.17444e-05	0.000197935	0.000140319	Egr1/Bmp7/Il6ra/Cflar/Pdgfb/Ret/Itgb3	7
GO:0046640	regulation of alpha-beta T cell proliferation	10/1197	37/23210	1.24472e-05	0.000207552	0.000147137	Vsir/Tgfbr2/Ptprc/Syk/Blm/Ripk2/Ceacam1/Ccr2/Cd28/Btla	10
GO:0002204	somatic recombination of immunoglobulin genes involved in immune response	12/1197	53/23210	1.25111e-05	0.000207552	0.000147137	Nsd2/Tgfb1/Paxip1/Rnf168/Ptprc/Msh6/Stat6/Atad5/Icosl/Ung/Exo1/Cd28	12
GO:0002208	somatic diversification of immunoglobulins involved in immune response	12/1197	53/23210	1.25111e-05	0.000207552	0.000147137	Nsd2/Tgfb1/Paxip1/Rnf168/Ptprc/Msh6/Stat6/Atad5/Icosl/Ung/Exo1/Cd28	12
GO:0030219	megakaryocyte differentiation	12/1197	53/23210	1.25111e-05	0.000207552	0.000147137	Wasf2/Sp1/Sp3/Pip4k2a/Hmgb2/Zfp385a/Mef2c/Sh2b3/Rcor1/Ptpn6/Fli1/Tal1	12
GO:0045190	isotype switching	12/1197	53/23210	1.25111e-05	0.000207552	0.000147137	Nsd2/Tgfb1/Paxip1/Rnf168/Ptprc/Msh6/Stat6/Atad5/Icosl/Ung/Exo1/Cd28	12
GO:0032103	positive regulation of response to external stimulus	42/1197	403/23210	1.27153e-05	0.000210279	0.00014907	Lgmn/P2ry12/Ctss/Adam10/Nfkbia/Nckap1l/Nfkbiz/Mapk14/Mdk/Hmgb2/Ano6/Ccr5/Ets1/Ly86/Tgfb1/Tiam1/Camk1d/Vav1/Pik3cg/Pdgfb/Cd180/Rac2/Tmem173/Bmp6/Tnfrsf11a/Il16/Tlr9/Btk/Ripk2/Edn3/Met/Cgas/Hspb1/Ccr2/Adora3/Ulbp1/Slamf6/Raet1a/Raet1b/Raet1c/Raet1d/Cd28	42
GO:0072124	regulation of glomerular mesangial cell proliferation	6/1197	12/23210	1.31237e-05	0.000216357	0.000153379	Egr1/Bmp7/Il6ra/Cflar/Pdgfb/Itgb3	6
GO:0035710	CD4-positive, alpha-beta T cell activation	17/1197	100/23210	1.32517e-05	0.000217788	0.000154393	Vsir/Nckap1l/Nfkbiz/Tgfbr2/Tgfb1/Stat6/Foxp1/Malt1/Sash3/Gpr183/Relb/Ripk2/Ceacam1/Ccr2/Irf4/Il2rg/Slamf6	17
GO:2001022	positive regulation of response to DNA damage stimulus	17/1197	101/23210	1.51777e-05	0.000247902	0.000175742	Fmr1/Smchd1/Pcna/Zfp385a/Atm/Slf2/Foxm1/Paxip1/Rnf168/Timeless/Ddx11/Spidr/Was/Blm/Slf1/Pmaip1/Ankle1	17
GO:0006289	nucleotide-excision repair	12/1197	54/23210	1.53365e-05	0.000249725	0.000177034	Rpa1/Pold1/Gtf2h2/Pold3/Pole/Rbbp8/Brca2/Rpa2/Polk/Fancc/Neil3/Brip1	12
GO:0051053	negative regulation of DNA metabolic process	19/1197	122/23210	1.55124e-05	0.000251814	0.000178515	Smchd1/Ctc1/Dcp2/Atm/Msh6/Rnf169/Rad50/Tinf2/Blm/Pif1/Polq/Rad18/Chek1/Ankle1/Parpbp/Rmi2/Cgas/Aunip/Radx	19
GO:0001894	tissue homeostasis	29/1197	238/23210	1.60072e-05	0.000259052	0.000183646	Csf1r/Epas1/Ctss/Trf/Cxadr/Ildr2/Tmem119/Inpp5d/Rpa1/Ptgs1/Ctsh/Cd34/Tmem64/Syk/Ubash3b/Rac2/Nanos1/Lrrk1/Mdm1/Sash3/Tnfrsf11a/Tlr9/Col2a1/Ceacam1/Itgb3/Ccr2/Cdh3/Tex15/Pthlh	29
GO:0032506	cytokinetic process	10/1197	38/23210	1.61155e-05	0.00025922	0.000183765	Myh9/Racgap1/Nup62/Ect2/Anln/Kif23/Kif20a/Aurkb/Kif20b/Cep55	10
GO:0060236	regulation of mitotic spindle organization	10/1197	38/23210	1.61155e-05	0.00025922	0.000183765	Smc1a/Smc3/Stag1/Tpx2/Tacc3/Nup62/Plk1/Bora/Psrc1/Ccsap	10
GO:0001503	ossification	40/1197	381/23210	1.71099e-05	0.000273039	0.000193562	H3f3b/Junb/Jund/Atp2b1/Sort1/Sp1/Bmp7/Igfbp3/Sp3/Tmem119/Mapk14/Lrp5/Mdk/Mef2c/Ano6/Bmp2k/Clic1/Tgfb1/Fndc3b/Jag1/Tmem64/Nfatc1/Cdk6/Kremen1/Npnt/Rflnb/Nab2/Klf10/Bmp6/Tnfrsf11a/Sfrp2/Fignl1/Enpp1/Col2a1/Fbxo5/Epha2/Bmp5/Clec5a/Rflna/Pthlh	40
GO:0072001	renal system development	34/1197	302/23210	1.7129e-05	0.000273039	0.000193562	Pdgfra/Egr1/Pou3f3/Basp1/Tgfbr1/Sall1/Spry1/Bmp7/Mef2c/Odc1/Cenpf/Il6ra/Tgfb1/Jag1/Cflar/Tek/Efnb2/Hes1/Npnt/Pdgfb/Gcnt1/Nup107/Itga8/Timeless/Bcl2l11/Bmp6/Fmn1/Cep55/Ret/Itgb3/Lgr5/Rarb/Wnt6/Foxf1	34
GO:0006301	postreplication repair	8/1197	24/23210	1.71294e-05	0.000273039	0.000193562	Pcna/Pclaf/Polh/Dtl/Polk/Primpol/Rad18/Pole2	8
GO:2000781	positive regulation of double-strand break repair	9/1197	31/23210	1.80037e-05	0.000286112	0.000202829	Smchd1/Slf2/Foxm1/Timeless/Ddx11/Spidr/Was/Blm/Slf1	9
GO:0010594	regulation of endothelial cell migration	22/1197	157/23210	1.92434e-05	0.000304899	0.000216147	Sparc/Lgmn/Rhob/Rock2/Sp1/Dab2ip/Mef2c/Plk2/Adgra2/Ets1/Map3k3/Tgfb1/Tek/Pdgfb/Prcp/Sh3bp1/Epha2/Ceacam1/Itgb3/Ccbe1/Met/Hspb1	22
GO:0018209	peptidyl-serine modification	37/1197	343/23210	1.93475e-05	0.000305633	0.000216668	Tgfbr1/Ppp1r15a/Rock2/Tgfbr2/Inpp5f/Mapk14/Mknk2/Plk2/Atm/Tgfb1/Morc3/Tek/Cdk2/Ccnb1/Syk/Cdk1/Hcls1/Pdgfb/Pbk/Vrk1/Plcl2/Plk1/Stk32b/Aurkb/Clspn/Galnt4/Ttk/Sfrp2/Mastl/Ripk2/Chek2/Ret/Mapkapk3/Vrk2/Met/Pkn3/Map4k1	37
GO:0072006	nephron development	21/1197	146/23210	1.9774e-05	0.00031144	0.000220785	Pdgfra/Egr1/Pou3f3/Basp1/Sall1/Bmp7/Mef2c/Il6ra/Tgfb1/Jag1/Cflar/Tek/Hes1/Npnt/Pdgfb/Nup107/Timeless/Fmn1/Ret/Itgb3/Wnt6	21
GO:0002639	positive regulation of immunoglobulin production	11/1197	47/23210	2.05427e-05	0.000322588	0.000228688	Nsd2/Tgfb1/Paxip1/Ptprc/Stat6/Atad5/Foxp1/Sash3/Tlr9/Ceacam1/Cd28	11
GO:0071902	positive regulation of protein serine/threonine kinase activity	32/1197	279/23210	2.06716e-05	0.000323652	0.000229442	Csf1r/Ccnd1/Trf/Tgfbr1/Ccnd2/Akap13/Grm5/Dab2ip/Iqgap1/Tgfb1/Tiam1/Ptprc/Syk/Pik3cg/Magi3/Pdgfb/Iqgap3/Map3k20/Tnfrsf11a/Pik3r5/Mdfic/Tlr9/Psrc1/Stil/Ripk2/Ret/Edn3/Cdc6/Ceacam1/Met/Map4k1/Lpar2	32
GO:0018108	peptidyl-tyrosine phosphorylation	35/1197	319/23210	2.24903e-05	0.000351087	0.000248891	Pdgfra/Csf1r/Grm5/Iqgap1/Inpp5f/Lyn/Sh2b3/Suz12/Il6ra/Tgfb1/Tek/Pecam1/Ptprc/Syk/Sla/Ptpn6/Ncapg2/Hes1/Hcls1/Pdgfb/Itgb2/Lrrk1/Wee1/Bmp6/Tal1/Ttk/Mvp/Sfrp2/Btk/Ripk2/Bank1/Cass4/Itgb3/Samsn1/Blk	35
GO:0045123	cellular extravasation	13/1197	65/23210	2.29259e-05	0.000356834	0.000252965	Sirpa/Cx3cr1/Vcam1/Selplg/Mdk/Pecam1/Itgam/Itga4/Gcnt1/Itgb2/Ptafr/Ccr2/Madcam1	13
GO:0051315	attachment of mitotic spindle microtubules to kinetochore	6/1197	13/23210	2.33064e-05	0.000358539	0.000254174	Cenpc1/Cenpe/Nuf2/Kif2c/Cdt1/Ndc80	6
GO:0072110	glomerular mesangial cell proliferation	6/1197	13/23210	2.33064e-05	0.000358539	0.000254174	Egr1/Bmp7/Il6ra/Cflar/Pdgfb/Itgb3	6
GO:0072711	cellular response to hydroxyurea	6/1197	13/23210	2.33064e-05	0.000358539	0.000254174	Fmr1/Timeless/Ddx11/Spidr/Blm/Rad51	6
GO:0090193	positive regulation of glomerulus development	6/1197	13/23210	2.33064e-05	0.000358539	0.000254174	Egr1/Il6ra/Cflar/Pdgfb/Ret/Itgb3	6
GO:0045577	regulation of B cell differentiation	9/1197	32/23210	2.39067e-05	0.000366707	0.000259964	Zfp36l2/Nckap1l/Inpp5d/Syk/Nfam1/Ptpn6/Tlr9/Il2rg/Ikzf3	9
GO:0010165	response to X-ray	8/1197	25/23210	2.40538e-05	0.000366838	0.000260057	Ccnd2/Nucks1/Atm/Xrcc2/Brca2/Blm/Sfrp2/Pmaip1	8
GO:0090344	negative regulation of cell aging	8/1197	25/23210	2.40538e-05	0.000366838	0.000260057	Nampt/Plk2/March5/Map3k3/Foxm1/Cdk6/Rbl1/Fbxo5	8
GO:0045765	regulation of angiogenesis	34/1197	307/23210	2.41328e-05	0.000366986	0.000260162	Sparc/Rhob/Cx3cr1/Rock2/Sp1/Pde3b/Adam12/Btg1/Dab2ip/Tgfbr2/Mdk/Plk2/Ctsh/Adgra2/Ets1/Map3k3/Cd34/Tek/Aplnr/Itgb2/Cyp1b1/Rras/Sfrp2/Ecscr/Emilin1/Hhex/Epha2/Cysltr1/Ceacam1/Itgb3/Ccbe1/Hspb1/Ccr2/Adm	34
GO:0003206	cardiac chamber morphogenesis	21/1197	148/23210	2.43755e-05	0.000369614	0.000262025	Tpm1/Nsd2/Tgfbr1/Bmp7/Tgfbr2/Mef2c/Heg1/Tgfb1/Jag1/Tek/Sav1/Nfatc1/Hes1/Sfrp2/Sema3c/Adgrg6/Bmp5/Gja5/Rarb/Foxf1/Dnah11	21
GO:0051653	spindle localization	11/1197	48/23210	2.54168e-05	0.000383941	0.000272182	Myh9/Spry1/Cdk5rap2/Aspm/Nusap1/Cenpa/Spag5/Mad2l1/Plk1/Ndc80/Spdl1	11
GO:0002706	regulation of lymphocyte mediated immunity	25/1197	195/23210	2.5538e-05	0.000383941	0.000272182	Nsd2/Vsir/Tgfb1/Paxip1/Tnfrsf1b/Ptprc/Vav1/Ptpn6/Stat6/Atad5/Was/Malt1/Sash3/Btk/Ceacam1/Il7r/Ccr2/Ulbp1/Slamf6/Raet1a/Raet1b/Raet1c/Raet1d/H2-Q10/Cd28	25
GO:0003205	cardiac chamber development	25/1197	195/23210	2.5538e-05	0.000383941	0.000272182	Tpm1/Nsd2/Myh10/Tgfbr1/Sall1/Lmo4/Bmp7/Tgfbr2/Mef2c/Heg1/Tgfb1/Jag1/Tek/Sav1/Nfatc1/Hes1/Sfrp2/Sema3c/Adgrg6/Bmp5/Gja5/Rarb/Foxf1/Dnah11/Tbx6	25
GO:0045911	positive regulation of DNA recombination	10/1197	40/23210	2.63011e-05	0.000394292	0.00027952	Nsd2/Tgfb1/Paxip1/Ptprc/Stat6/Timeless/Atad5/Was/Blm/Cd28	10
GO:0045582	positive regulation of T cell differentiation	16/1197	95/23210	2.66056e-05	0.00039773	0.000281957	Vsir/Nckap1l/Nfkbiz/Tgfbr2/Mdk/Tgfb1/Ptprc/Syk/Ikzf1/Malt1/Sash3/Il1rl2/Ripk2/Il7r/Ccr2/Il2rg	16
GO:0018212	peptidyl-tyrosine modification	35/1197	322/23210	2.7398e-05	0.000408423	0.000289537	Pdgfra/Csf1r/Grm5/Iqgap1/Inpp5f/Lyn/Sh2b3/Suz12/Il6ra/Tgfb1/Tek/Pecam1/Ptprc/Syk/Sla/Ptpn6/Ncapg2/Hes1/Hcls1/Pdgfb/Itgb2/Lrrk1/Wee1/Bmp6/Tal1/Ttk/Mvp/Sfrp2/Btk/Ripk2/Bank1/Cass4/Itgb3/Samsn1/Blk	35
GO:0051098	regulation of binding	41/1197	403/23210	2.82125e-05	0.000419383	0.000297307	Actb/Jun/Hjurp/Tgfbr1/Nucks1/Adam15/Fmr1/Dab2ip/Hmgb2/Mef2c/Plk2/Stmn1/Tgfb1/Ifit2/Tiam1/Hes1/Pdgfb/Ubash3b/Itga4/Plcl2/Plk1/Cdon/Larp7/Tmem173/Aurkb/Dut/Dact1/Ddx11/Cdt1/Blm/Nek2/Ckmt1/Aurka/Disc1/E2f1/Ripk2/Cdca5/Tfap4/Met/Irf4/Spta1	41
GO:0031334	positive regulation of protein-containing complex assembly	27/1197	221/23210	2.95388e-05	0.000436646	0.000309545	P2ry12/Msn/Nckap1l/Cdk5rap2/Evl/Lcp1/Vasp/Esr1/Atm/Slf2/Tgfb1/Clip1/Piezo1/Syk/Ikzf1/Baiap2/Bmf/Spidr/Cdt1/Was/Bcl2l11/Tal1/Slf1/Psrc1/Bbc3/Fmn1/Met	27
GO:0032467	positive regulation of cytokinesis	9/1197	33/23210	3.13739e-05	0.000462481	0.00032786	Racgap1/Nup62/Ect2/Cdc25b/Kif23/Aurkb/Kif20b/Kif14/Cdc6	9
GO:0007568	aging	29/1197	247/23210	3.21964e-05	0.000473286	0.00033552	Picalm/Grm5/Nampt/Pmp22/Inpp5d/Mapk14/Plk2/Ctc1/March5/Atm/Map3k3/Foxm1/Morc3/Nuak1/Cdk6/Msh6/Cdk1/Nup62/Cdkn1a/Rbl1/Zfp217/Brca2/Bbc3/Rad54l/Fbxo5/Chek2/Rad54b/Cgas/Cdkn2b	29
GO:0044380	protein localization to cytoskeleton	12/1197	58/23210	3.2953e-05	0.000483068	0.000342454	Cep192/Nup62/Spag5/Anln/Kif20b/Ttk/Cep72/Aurka/Mid1/Disc1/Fam83d/Stil	12
GO:2000780	negative regulation of double-strand break repair	8/1197	26/23210	3.31778e-05	0.000485019	0.000343837	Smchd1/Rnf169/Polq/Parpbp/Rmi2/Cgas/Aunip/Radx	8
GO:0060485	mesenchyme development	31/1197	273/23210	3.35802e-05	0.000489549	0.000347049	Flna/Tgfbr1/Exoc4/Bmp7/Adam15/Dab2ip/Tgfbr2/Mdk/Mef2c/Sema7a/Tgfb1/Jag1/Akna/Tiam1/Frzb/Nfatc1/Hes1/Phldb2/Rflnb/Itga4/Ldlrad4/Sema3g/Efnb1/Sfrp2/Sema3c/Fam83d/Ret/Edn3/Bmp5/Foxf1/Bnc2	31
GO:0071241	cellular response to inorganic substance	27/1197	223/23210	3.46657e-05	0.0005006	0.000354883	Fos/Jun/Lgmn/Junb/Jund/Trf/Hnrnpd/Mef2a/Fmr1/Iqgap1/Asph/Mef2c/Slc40a1/Adcy7/Mtr/Cflar/Nfatc3/Ect2/Cpne8/Timeless/Ddx11/Spidr/Blm/Bmp6/Rad51/Syt15/Capn3	27
GO:0010595	positive regulation of endothelial cell migration	16/1197	97/23210	3.47055e-05	0.0005006	0.000354883	Sparc/Lgmn/Rhob/Rock2/Sp1/Plk2/Adgra2/Ets1/Map3k3/Tgfb1/Tek/Pdgfb/Itgb3/Ccbe1/Met/Hspb1	16
GO:0071277	cellular response to calcium ion	14/1197	77/23210	3.47761e-05	0.0005006	0.000354883	Fos/Jun/Lgmn/Junb/Jund/Mef2a/Iqgap1/Asph/Mef2c/Nfatc3/Ect2/Cpne8/Syt15/Capn3	14
GO:0045621	positive regulation of lymphocyte differentiation	17/1197	108/23210	3.72189e-05	0.000533774	0.0003784	Vsir/Nckap1l/Nfkbiz/Tgfbr2/Inpp5d/Mdk/Tgfb1/Ptprc/Syk/Ikzf1/Malt1/Sash3/Il1rl2/Ripk2/Il7r/Ccr2/Il2rg	17
GO:0030865	cortical cytoskeleton organization	11/1197	50/23210	3.82216e-05	0.000546673	0.000387544	Nckap1l/Rock2/Rhoq/Racgap1/Fmnl3/Fmnl1/Ect2/Anln/Kif23/Was/Synpo	11
GO:2000278	regulation of DNA biosynthetic process	18/1197	119/23210	3.84615e-05	0.00054862	0.000388925	Hnrnpd/Ctc1/Dcp2/Atm/Rfc2/Cdkn1a/Pdgfb/Tinf2/Aurkb/Rfc3/Rfc5/Cyp1b1/Nek2/Chtf18/Pif1/Rfc4/Chek1/Dscc1	18
GO:0072710	response to hydroxyurea	6/1197	14/23210	3.90037e-05	0.000554859	0.000393348	Fmr1/Timeless/Ddx11/Spidr/Blm/Rad51	6
GO:0008347	glial cell migration	12/1197	59/23210	3.94431e-05	0.000559172	0.000396405	Hexb/P2ry12/Vim/Srgap2/Mboat7/Dab2ip/Pmp22/Sun2/Tiam1/Gpr183/Disc1/Ccr2	12
GO:0071482	cellular response to light stimulus	16/1197	98/23210	3.95182e-05	0.000559172	0.000396405	Fmr1/Pcna/Trp53inp1/N4bp1/Rnf168/Pold1/Cdkn1a/Pbk/Pold3/Aurkb/Bmf/Polh/Polk/Chek1/Ddias/Trpm1	16
GO:0010950	positive regulation of endopeptidase activity	21/1197	153/23210	4.03507e-05	0.000568537	0.000403045	Lgmn/Picalm/Vsir/Rock2/Asph/Lyn/Syk/Apaf1/Casp8ap2/Casp8/Bcl2l11/Malt1/Sfrp2/Bbc3/Ripk2/Pidd1/Ret/Pmaip1/Tfap4/P2rx1/Nlrp1b	21
GO:0002260	lymphocyte homeostasis	14/1197	78/23210	4.03949e-05	0.000568537	0.000403045	Nckap1l/Lyn/Mef2c/Slc40a1/Tgfb1/Pik3cd/Dock11/Ccnb2/Bcl2l11/Tnfrsf13b/Ceacam1/Pmaip1/Spta1/Gapt	14
GO:0010632	regulation of epithelial cell migration	27/1197	225/23210	4.05834e-05	0.000568702	0.000403161	Sparc/Jun/Lgmn/Rhob/Rock2/Sp1/Evl/Dab2ip/Tgfbr2/Mef2c/Plk2/Ctsh/Adgra2/Ets1/Map3k3/Tgfb1/Tek/Rreb1/Pdgfb/Prcp/Sh3bp1/Epha2/Ceacam1/Itgb3/Ccbe1/Met/Hspb1	27
GO:1903035	negative regulation of response to wounding	15/1197	88/23210	4.07455e-05	0.000568702	0.000403161	Pdgfra/Inpp5f/Mdk/Sh2b3/Pros1/Cd34/Kremen1/Phldb2/Cdkn1a/Pdgfb/Ubash3b/Rtn4rl1/Tfpi/Ceacam1/Klk8	15
GO:0035855	megakaryocyte development	7/1197	20/23210	4.08365e-05	0.000568702	0.000403161	Wasf2/Pip4k2a/Zfp385a/Sh2b3/Ptpn6/Fli1/Tal1	7
GO:0030866	cortical actin cytoskeleton organization	10/1197	42/23210	4.15582e-05	0.000577234	0.00040921	Nckap1l/Rock2/Rhoq/Racgap1/Fmnl3/Fmnl1/Ect2/Anln/Kif23/Was	10
GO:0050920	regulation of chemotaxis	26/1197	213/23210	4.17914e-05	0.000578922	0.000410407	Pdgfra/Lgmn/P2ry12/Adam10/Nckap1l/Mapk14/Mdk/Lyn/Ano6/Sema7a/Mtus1/Adgra2/Tgfb1/Tiam1/Camk1d/Efnb2/Pdgfb/Sema3g/Rac2/Gpr183/Il16/Sema3c/Edn3/Met/Hspb1/Ccr2	26
GO:0051017	actin filament bundle assembly	22/1197	165/23210	4.19564e-05	0.000578922	0.000410407	Rhob/Flna/Tpm1/Myh10/Actn4/Tgfbr1/Itgb5/Wasf2/Eln/Rock2/Evl/Lcp1/Zyx/Stmn1/Myo1b/Phldb2/Baiap2/Was/Kank4/Synpo/Met/Espn	22
GO:0042035	regulation of cytokine biosynthetic process	17/1197	109/23210	4.2008e-05	0.000578922	0.000410407	Egr1/Zfp36/Cx3cr1/Inpp5d/Akap12/Ube2j1/Ptprc/Syk/Tlr7/Ptafr/Icosl/Tlr9/Tlr1/Hspb1/Ccr2/Irf4/Cd28	17
GO:0040013	negative regulation of locomotion	34/1197	316/23210	4.36224e-05	0.00059961	0.000425073	Rhob/Abhd2/Cx3cr1/Tpm1/Srgap2/Grm5/Adam15/Evl/Dab2ip/Igfbp3/Afdn/Mef2c/Trib1/Ccr5/Sema7a/Trp53inp1/Tgfb1/Arrdc3/Jag1/Phldb2/Arhgdib/Pdgfb/Ldlrad4/Sema3g/Erdr1/Was/Cyp1b1/Rras/Sfrp2/Emilin1/Sema3c/Podn/Adora3/Ccdc125	34
GO:0045738	negative regulation of DNA repair	8/1197	27/23210	4.50229e-05	0.000615662	0.000436452	Smchd1/Rnf169/Polq/Parpbp/Rmi2/Cgas/Aunip/Radx	8
GO:0050901	leukocyte tethering or rolling	8/1197	27/23210	4.50229e-05	0.000615662	0.000436452	Cx3cr1/Vcam1/Selplg/Itga4/Gcnt1/Ptafr/Ccr2/Madcam1	8
GO:0007140	male meiotic nuclear division	11/1197	51/23210	4.64802e-05	0.000633095	0.000448811	Atm/Mybl1/Fanca/Brca2/Sgo2a/Fignl1/Chtf18/Kif18a/Trip13/Rad51c/Tex15	11
GO:0010634	positive regulation of epithelial cell migration	20/1197	143/23210	4.65371e-05	0.000633095	0.000448811	Sparc/Jun/Lgmn/Rhob/Rock2/Sp1/Tgfbr2/Plk2/Ctsh/Adgra2/Ets1/Map3k3/Tgfb1/Tek/Rreb1/Pdgfb/Itgb3/Ccbe1/Met/Hspb1	20
GO:0046850	regulation of bone remodeling	12/1197	60/23210	4.70121e-05	0.000637917	0.000452229	Csf1r/Trf/Tmem119/Inpp5d/Mdk/Tmem64/Syk/Ubash3b/Inpp4b/Tnfrsf11a/Ceacam1/Itgb3	12
GO:0001776	leukocyte homeostasis	17/1197	110/23210	4.73342e-05	0.000640646	0.000454164	Nckap1l/Lyn/Mef2c/Sh2b3/Slc40a1/Tgfb1/Pik3cd/Dock11/Ccnb2/Bcl2l11/Gpr183/Tnfrsf13b/Ceacam1/Pmaip1/Ccr2/Spta1/Gapt	17
GO:0007569	cell aging	21/1197	155/23210	4.9006e-05	0.000661581	0.000469005	Nampt/Mapk14/Plk2/Ctc1/March5/Atm/Map3k3/Foxm1/Morc3/Nuak1/Cdk6/Cdk1/Nup62/Cdkn1a/Rbl1/Zfp217/Brca2/Fbxo5/Chek2/Cgas/Cdkn2b	21
GO:0002460	adaptive immune response based on somatic recombination of immune receptors built from immunoglobulin superfamily domains	43/1197	441/23210	4.97987e-05	0.000670572	0.000475379	Nsd2/Vsir/Nfkbiz/Inpp5d/Mef2c/Il6ra/Ctsh/Tgfb1/Jag1/Lyst/Paxip1/Rnf168/Tnfrsf1b/Ptprc/Pou2f2/Msh6/Ptpn6/Stat6/Hprt/Atad5/Was/Malt1/Sash3/Icosl/Rab27a/Btk/Relb/Klhl6/Ripk2/Ung/Exo1/Il7r/Ccr2/Irf4/Ulbp1/Slamf6/Raet1a/Raet1b/Raet1c/Raet1d/H2-Q10/Cd28/Gapt	43
GO:0097193	intrinsic apoptotic signaling pathway	32/1197	292/23210	5.07781e-05	0.000682025	0.000483498	Serinc3/Ivns1abp/Dab2ip/Dnajc10/Zfp385a/Atm/Herpud1/Tnfrsf1b/Itpr1/Msh6/Tmem109/Cdkn1a/Apaf1/Phlda3/Aen/Atad5/Bub1/Hells/Brca2/Bcl2l11/Cyp1b1/Rtkn2/Eda2r/Fignl1/Melk/Bbc3/E2f1/Epha2/Chek2/Pmaip1/Ddias/Hspb1	32
GO:0002705	positive regulation of leukocyte mediated immunity	23/1197	179/23210	5.11354e-05	0.000685085	0.000485667	Nsd2/Tgfb1/Paxip1/Ptprc/Syk/Itgam/Vav1/Stat6/Itgb2/Atad5/Ptafr/Malt1/Sash3/Btk/Adora3/Ulbp1/Slamf6/Raet1a/Raet1b/Raet1c/Raet1d/H2-Q10/Cd28	23
GO:0051293	establishment of spindle localization	10/1197	43/23210	5.16663e-05	0.000688711	0.000488237	Myh9/Spry1/Cdk5rap2/Nusap1/Cenpa/Spag5/Mad2l1/Plk1/Ndc80/Spdl1	10
GO:2001021	negative regulation of response to DNA damage stimulus	13/1197	70/23210	5.21664e-05	0.000693629	0.000491724	Smchd1/Zfp385a/Rnf169/Atad5/Polq/Fbxo5/Chek2/Parpbp/Rmi2/Cgas/Ddias/Aunip/Radx	13
GO:0071901	negative regulation of protein serine/threonine kinase activity	17/1197	111/23210	5.32487e-05	0.000706246	0.000500668	Dusp6/Spry1/Bmp7/Dab2ip/Lrp5/Lyn/Sh2b3/Rgs2/Heg1/Ptpn6/Cdkn2c/Nup62/Cdkn1a/Plk1/Sfrp2/Hhex/Tfap4	17
GO:0072698	protein localization to microtubule cytoskeleton	11/1197	52/23210	5.62269e-05	0.000743882	0.000527349	Cep192/Nup62/Spag5/Kif20b/Ttk/Cep72/Aurka/Mid1/Disc1/Fam83d/Stil	11
GO:0048762	mesenchymal cell differentiation	26/1197	217/23210	5.7394e-05	0.000757429	0.000536953	Flna/Tgfbr1/Bmp7/Adam15/Dab2ip/Tgfbr2/Mdk/Mef2c/Sema7a/Tgfb1/Jag1/Akna/Tiam1/Frzb/Nfatc1/Hes1/Phldb2/Rflnb/Ldlrad4/Sema3g/Efnb1/Sfrp2/Sema3c/Fam83d/Ret/Edn3	26
GO:0034446	substrate adhesion-dependent cell spreading	16/1197	101/23210	5.76723e-05	0.000759209	0.000538215	Lamc1/Flna/Actn4/Srgap2/Lims1/Mdk/Fndc3b/Tek/Rreb1/Parvg/Itga4/Itga8/Kif14/Postn/Cass4/Itgb3	16
GO:0001822	kidney development	31/1197	281/23210	5.83062e-05	0.000765649	0.00054278	Pdgfra/Egr1/Pou3f3/Basp1/Tgfbr1/Sall1/Spry1/Bmp7/Mef2c/Odc1/Cenpf/Il6ra/Tgfb1/Jag1/Cflar/Tek/Efnb2/Hes1/Npnt/Pdgfb/Gcnt1/Nup107/Itga8/Timeless/Bcl2l11/Bmp6/Fmn1/Ret/Itgb3/Rarb/Wnt6	31
GO:0007095	mitotic G2 DNA damage checkpoint	7/1197	21/23210	5.85325e-05	0.000766718	0.000543538	Ccng1/Atm/Cdk1/Mre11a/Clspn/Blm/Donson	7
GO:0008630	intrinsic apoptotic signaling pathway in response to DNA damage	17/1197	112/23210	5.98063e-05	0.000781469	0.000553995	Zfp385a/Atm/Tnfrsf1b/Msh6/Tmem109/Cdkn1a/Phlda3/Aen/Atad5/Brca2/Bcl2l11/Bbc3/E2f1/Epha2/Chek2/Pmaip1/Ddias	17
GO:0036297	interstrand cross-link repair	8/1197	28/23210	6.01937e-05	0.000782665	0.000554843	Nucks1/Msh6/Rfwd3/Fanca/Fancc/Rad51ap1/Rad51/Mcm8	8
GO:0051307	meiotic chromosome separation	8/1197	28/23210	6.01937e-05	0.000782665	0.000554843	Top2a/Ncapd3/Espl1/Ncaph/Lrrk1/Ttk/Eme1/Cenps	8
GO:0043367	CD4-positive, alpha-beta T cell differentiation	14/1197	81/23210	6.22915e-05	0.000805981	0.000571372	Nckap1l/Nfkbiz/Tgfb1/Stat6/Foxp1/Malt1/Sash3/Gpr183/Relb/Ripk2/Ccr2/Irf4/Il2rg/Slamf6	14
GO:0007599	hemostasis	21/1197	158/23210	6.51052e-05	0.000840333	0.000595725	Pdgfra/P2ry12/Evl/Entpd1/Lyn/Zfp385a/Sh2b3/Ano6/Pros1/Cd34/Lyst/Syk/Ptpn6/Pdgfb/Ubash3b/Rab27a/Tfpi/Ceacam1/Itgb3/Procr/P2rx1	21
GO:0045598	regulation of fat cell differentiation	19/1197	135/23210	6.54362e-05	0.000842298	0.000597118	Zfp36/Zfp36l2/Sort1/Mapk14/Lrp5/Zfp385a/Tgfb1/Fndc3b/Jag1/Frzb/Tmem64/Sav1/Hes1/Dact1/Sfrp2/Enpp1/E2f1/Nucb2/Ptprq	19
GO:0006469	negative regulation of protein kinase activity	24/1197	194/23210	6.55757e-05	0.000842298	0.000597118	Actb/Dusp6/Spry1/Bmp7/Dab2ip/Lrp5/Lyn/Trib1/Sh2b3/Rgs2/Heg1/Ptprc/Ptpn6/Cdkn2c/Nup62/Cdkn1a/Ubash3b/Plk1/Mvp/Sfrp2/Hhex/Ceacam1/Tfap4/Hspb1	24
GO:2001252	positive regulation of chromosome organization	23/1197	182/23210	6.63541e-05	0.000850232	0.000602742	Rad21/Hnrnpd/Dnmt1/Fmr1/Atm/Slf2/Tgfb1/Paxip1/Ccnb1/Gtf2h2/Cenpe/Resf1/Mre11a/Rad50/Fen1/Aurkb/Phf19/Ddx11/Cdt1/Sgo2a/Tal1/Nek2/Slf1	23
GO:2000516	positive regulation of CD4-positive, alpha-beta T cell activation	9/1197	36/23210	6.65962e-05	0.000851273	0.00060348	Nckap1l/Nfkbiz/Tgfbr2/Malt1/Sash3/Ripk2/Ceacam1/Ccr2/Il2rg	9
GO:2000177	regulation of neural precursor cell proliferation	17/1197	113/23210	6.70659e-05	0.000855212	0.000606273	Cx3cr1/Btg2/Flna/Trf/Sall1/Lims1/Afdn/Mdk/Lyn/Ccr5/Aspm/Tgfb1/Cip2a/Cdon/Dct/Shcbp1/Disc1	17
GO:0043406	positive regulation of MAP kinase activity	26/1197	220/23210	7.23387e-05	0.000920232	0.000652367	Trf/Tgfbr1/Akap13/Grm5/Dab2ip/Iqgap1/Tgfb1/Tiam1/Ptprc/Syk/Pik3cg/Magi3/Pdgfb/Iqgap3/Map3k20/Tnfrsf11a/Pik3r5/Mdfic/Tlr9/Ripk2/Ret/Edn3/Ceacam1/Met/Map4k1/Lpar2	26
GO:0033314	mitotic DNA replication checkpoint	5/1197	10/23210	7.33316e-05	0.000926183	0.000656585	Topbp1/Clspn/Ticrr/Cdc6/Orc1	5
GO:0060710	chorio-allantoic fusion	5/1197	10/23210	7.33316e-05	0.000926183	0.000656585	Vcam1/Bmp7/Erf/Itga4/Bmp5	5
GO:1901724	positive regulation of cell proliferation involved in kidney development	5/1197	10/23210	7.33316e-05	0.000926183	0.000656585	Egr1/Il6ra/Cflar/Pdgfb/Itgb3	5
GO:0002761	regulation of myeloid leukocyte differentiation	18/1197	125/23210	7.45705e-05	0.000939589	0.000666089	Fos/Csf1r/Jun/Inpp5d/Lyn/Trib1/Tgfb1/Tmem64/Ikzf1/Cdk6/Hcls1/Ubash3b/Klf10/Inpp4b/Casp8/Tal1/Ceacam1/Itgb3	18
GO:0048608	reproductive structure development	43/1197	449/23210	7.53176e-05	0.000946747	0.000671164	Pdgfra/Epas1/H3f3b/Junb/Ccnd1/Flna/Tgfbr1/Vcam1/Sp1/Bmp7/Erf/Sp3/Mapk14/Hmgb2/Esr1/Arid4a/Atm/Aspm/Nrip1/Hes1/Pdgfb/Prdx4/Itga4/Nup107/Tifab/Plk4/Ccnf/Fanca/Brca2/Tcf7/Bcl2l11/Bmp6/Sfrp2/Kif18a/E2f7/Bmp5/Brip1/Met/Adm/Tex15/Plag1/Umodl1/Rln1	43
GO:0051348	negative regulation of transferase activity	28/1197	246/23210	7.58235e-05	0.000950848	0.00067407	Actb/Zfp36/Dusp6/Spry1/Bmp7/Dab2ip/Lrp5/Lyn/Trib1/Sh2b3/Rgs2/Heg1/Ptprc/Ptpn6/Cdkn2c/Nup62/Cdkn1a/Ubash3b/Mad2l1/Plk1/Mvp/Sfrp2/Pif1/Hhex/Fbxo5/Ceacam1/Tfap4/Hspb1	28
GO:0061138	morphogenesis of a branching epithelium	26/1197	221/23210	7.80454e-05	0.000976398	0.000692183	Pdgfra/Sall1/Spry1/Bmp7/Tgfbr2/Lrp5/Mdk/Esr1/Ctsh/Tgfb1/Tek/Nfatc3/Nfatc1/Npnt/B4galt1/Pdgfb/Lama1/Timeless/Sfrp2/Sema3c/Hhex/Epha2/Met/Wnt6/Foxf1/Adm	26
GO:0048754	branching morphogenesis of an epithelial tube	23/1197	184/23210	7.86304e-05	0.000981397	0.000695727	Pdgfra/Sall1/Spry1/Bmp7/Tgfbr2/Lrp5/Mdk/Esr1/Ctsh/Tgfb1/Tek/Nfatc3/Nfatc1/Npnt/B4galt1/Lama1/Timeless/Sfrp2/Hhex/Epha2/Met/Wnt6/Foxf1	23
GO:0071480	cellular response to gamma radiation	8/1197	29/23210	7.93839e-05	0.000981541	0.000695829	Egr1/H2afx/Atm/Tmem109/Cdkn1a/Map3k20/Chek2/Ddias	8
GO:0072395	signal transduction involved in cell cycle checkpoint	8/1197	29/23210	7.93839e-05	0.000981541	0.000695829	Cdc5l/Atm/Cdkn1a/Plk1/Dtl/Chek1/Chek2/Pidd1	8
GO:0072401	signal transduction involved in DNA integrity checkpoint	8/1197	29/23210	7.93839e-05	0.000981541	0.000695829	Cdc5l/Atm/Cdkn1a/Plk1/Dtl/Chek1/Chek2/Pidd1	8
GO:0072422	signal transduction involved in DNA damage checkpoint	8/1197	29/23210	7.93839e-05	0.000981541	0.000695829	Cdc5l/Atm/Cdkn1a/Plk1/Dtl/Chek1/Chek2/Pidd1	8
GO:0060326	cell chemotaxis	32/1197	299/23210	7.99819e-05	0.00098597	0.000698969	Pdgfra/Lgmn/Cx3cr1/Adam10/Vcam1/Nckap1l/Cxadr/Mapk14/Mdk/Hmgb2/Lyn/Ano6/Ccr5/Mtus1/Lyst/Tiam1/Camk1d/Syk/Bin2/Itgam/Vav1/Pdgfb/Itgb2/Rac2/Gpr183/Il16/Epha2/Edn3/Met/Hspb1/Ccr2/Gpr35	32
GO:0002456	T cell mediated immunity	19/1197	137/23210	8.01147e-05	0.00098597	0.000698969	Vsir/Ctsh/Jag1/Lyst/Tnfrsf1b/Ptprc/Hprt/Was/Malt1/Sash3/Rab27a/Il7r/Ccr2/Ulbp1/Raet1a/Raet1b/Raet1c/Raet1d/H2-Q10	19
GO:0021537	telencephalon development	28/1197	247/23210	8.14014e-05	0.00099948	0.000708547	Csf1r/Cx3cr1/Pou3f3/Btg2/P2ry12/Myh10/Srgap2/Sall1/Tra2b/Zbtb18/Mboat7/Dab2ip/Tacc1/Sun2/Afdn/Mdk/Sema7a/Aspm/Tacc3/Hes1/Hprt/Cdon/Wdr62/Rtn4rl1/Kif14/Uchl5/Disc1/Rarb	28
GO:0050727	regulation of inflammatory response	35/1197	340/23210	8.36196e-05	0.00102434	0.00072617	Zfp36/Sirpa/Cx3cr1/Ctss/Nfkbia/Nfkbiz/Pmp22/Mapk14/Mdk/Lyn/Ccr5/Esr1/Sema7a/Adcy7/Atm/Ets1/Akna/Tnfrsf1b/Pik3cg/Pbk/Nt5e/Tmem173/Fanca/Fancd2/Tnfrsf11a/Il1rl2/Tlr9/Btk/Tnfaip8l2/Enpp3/Tnfaip6/Foxf1/Ccr2/Adora3/Cd28	35
GO:0045766	positive regulation of angiogenesis	23/1197	185/23210	8.54972e-05	0.00104492	0.000740761	Rhob/Cx3cr1/Sp1/Adam12/Btg1/Tgfbr2/Mdk/Plk2/Ctsh/Ets1/Map3k3/Cd34/Tek/Aplnr/Itgb2/Cyp1b1/Rras/Sfrp2/Cysltr1/Itgb3/Ccbe1/Hspb1/Adm	23
GO:1902807	negative regulation of cell cycle G1/S phase transition	12/1197	64/23210	9.12228e-05	0.00111233	0.000788547	Ccnd1/Gas1/Rfwd3/Cdkn1a/Rbl1/Jade1/Dact1/Rpa2/Pidd1/E2f7/Haspin/Cdkn2b	12
GO:0061458	reproductive system development	43/1197	453/23210	9.21064e-05	0.00112052	0.000794355	Pdgfra/Epas1/H3f3b/Junb/Ccnd1/Flna/Tgfbr1/Vcam1/Sp1/Bmp7/Erf/Sp3/Mapk14/Hmgb2/Esr1/Arid4a/Atm/Aspm/Nrip1/Hes1/Pdgfb/Prdx4/Itga4/Nup107/Tifab/Plk4/Ccnf/Fanca/Brca2/Tcf7/Bcl2l11/Bmp6/Sfrp2/Kif18a/E2f7/Bmp5/Brip1/Met/Adm/Tex15/Plag1/Umodl1/Rln1	43
GO:0034103	regulation of tissue remodeling	14/1197	84/23210	9.38927e-05	0.00113641	0.000805618	Csf1r/Trf/Rock2/Tmem119/Inpp5d/Mdk/Tmem64/Syk/B4galt1/Ubash3b/Inpp4b/Tnfrsf11a/Ceacam1/Itgb3	14
GO:0042108	positive regulation of cytokine biosynthetic process	13/1197	74/23210	9.50096e-05	0.00113641	0.000805618	Egr1/Akap12/Ptprc/Syk/Tlr7/Ptafr/Icosl/Tlr9/Tlr1/Hspb1/Ccr2/Irf4/Cd28	13
GO:0045453	bone resorption	13/1197	74/23210	9.50096e-05	0.00113641	0.000805618	Csf1r/Ctss/Trf/Tmem119/Inpp5d/Tmem64/Syk/Ubash3b/Rac2/Lrrk1/Tnfrsf11a/Ceacam1/Itgb3	13
GO:0042772	DNA damage response, signal transduction resulting in transcription	6/1197	16/23210	9.51303e-05	0.00113641	0.000805618	Zfp385a/Foxm1/Cdkn1a/Brca2/Chek2/Tfap4	6
GO:0072109	glomerular mesangium development	6/1197	16/23210	9.51303e-05	0.00113641	0.000805618	Egr1/Bmp7/Il6ra/Cflar/Pdgfb/Itgb3	6
GO:1901722	regulation of cell proliferation involved in kidney development	6/1197	16/23210	9.51303e-05	0.00113641	0.000805618	Egr1/Bmp7/Il6ra/Cflar/Pdgfb/Itgb3	6
GO:1904996	positive regulation of leukocyte adhesion to vascular endothelial cell	6/1197	16/23210	9.51303e-05	0.00113641	0.000805618	Mdk/Ets1/Itga4/Itgb2/Ptafr/Ccr2	6
GO:0051271	negative regulation of cellular component movement	33/1197	316/23210	0.000100199	0.00119426	0.00084663	Rhob/Abhd2/Cx3cr1/Tpm1/Actn4/Srgap2/Adam15/Evl/Dab2ip/Igfbp3/Afdn/Mef2c/Trib1/Ccr5/Sema7a/Trp53inp1/Tgfb1/Jag1/Phldb2/Arhgdib/Pdgfb/Ldlrad4/Sema3g/Erdr1/Was/Cyp1b1/Rras/Sfrp2/Emilin1/Sema3c/Podn/Adora3/Ccdc125	33
GO:0050730	regulation of peptidyl-tyrosine phosphorylation	29/1197	263/23210	0.000100466	0.00119475	0.000846979	Pdgfra/Csf1r/Grm5/Iqgap1/Inpp5f/Lyn/Sh2b3/Suz12/Il6ra/Tgfb1/Pecam1/Ptprc/Syk/Ptpn6/Ncapg2/Hes1/Hcls1/Pdgfb/Itgb2/Lrrk1/Bmp6/Tal1/Mvp/Sfrp2/Ripk2/Bank1/Cass4/Itgb3/Samsn1	29
GO:0034724	DNA replication-independent nucleosome organization	8/1197	30/23210	0.000103383	0.00122668	0.000869614	Hjurp/Supt16/Nasp/Hat1/Mis18a/Asf1b/Oip5/Cenpp	8
GO:0030851	granulocyte differentiation	9/1197	38/23210	0.000105069	0.00124391	0.000881824	Sp3/Inpp5d/Trib1/Lbr/Spi1/Ikzf1/Hcls1/Cbfa2t3/Ceacam1	9
GO:0002275	myeloid cell activation involved in immune response	14/1197	85/23210	0.000107144	0.00126564	0.00089723	Cx3cr1/Lyn/Dock2/Syk/Itgam/Myo1f/Itgb2/Rac2/Ptafr/Btk/Enpp3/Foxf1/Ccr2/Adora3	14
GO:0032680	regulation of tumor necrosis factor production	21/1197	164/23210	0.000112019	0.00132027	0.000935961	Zfp36/Sirpa/Cx3cr1/Vsir/Akap12/Ifngr1/Ube2j1/Ccr5/Cd34/Ptprc/Syk/Ptpn6/Ptafr/Sash3/Tlr9/Clec4a2/Ripk2/Tlr1/Hspb1/Ccr2/Cd2	21
GO:0046931	pore complex assembly	7/1197	23/23210	0.000112694	0.00132528	0.000939511	Adam10/Nup153/Afdn/Nup205/Ano6/Ndc1/Nup107	7
GO:0002685	regulation of leukocyte migration	24/1197	201/23210	0.000114905	0.00134828	0.000955819	Lgmn/P2ry12/Adam10/Msn/Nckap1l/Mapk14/Mdk/Lyn/Ano6/Mtus1/Tgfb1/Dock8/Camk1d/Pecam1/Stk10/Itga4/Rac2/Ptafr/Emilin1/Edn3/Itgb3/Ccr2/Adora3/Madcam1	24
GO:0043393	regulation of protein binding	27/1197	240/23210	0.000122999	0.00144007	0.00102089	Actb/Tgfbr1/Adam15/Dab2ip/Mef2c/Plk2/Stmn1/Ifit2/Tiam1/Hes1/Pdgfb/Ubash3b/Itga4/Plcl2/Plk1/Cdon/Tmem173/Aurkb/Dut/Dact1/Ddx11/Ckmt1/Aurka/Disc1/Ripk2/Met/Spta1	27
GO:0003158	endothelium development	17/1197	119/23210	0.000129245	0.00150652	0.001068	Rhob/Tgfbr1/Msn/Rap1b/Rock2/Btg1/Afdn/Col18a1/Slc40a1/Heg1/Jag1/Pecam1/Pdgfb/Col23a1/Bmp6/Ceacam1/Met	17
GO:0046578	regulation of Ras protein signal transduction	26/1197	228/23210	0.000130644	0.00151949	0.00107719	Rasa3/Akap13/Spry1/Spata13/Cyth4/Dab2ip/Stmn1/Heg1/Foxm1/Tiam1/Dock2/Vav1/Cyth3/Arhgef6/Arhgdib/Nup62/Ect2/Kif14/Lpar6/Psd4/Arhgef39/Met/Gpr35/Lpar2/P2ry10b/Ccdc125	26
GO:1903555	regulation of tumor necrosis factor superfamily cytokine production	21/1197	166/23210	0.000133269	0.00154663	0.00109643	Zfp36/Sirpa/Cx3cr1/Vsir/Akap12/Ifngr1/Ube2j1/Ccr5/Cd34/Ptprc/Syk/Ptpn6/Ptafr/Sash3/Tlr9/Clec4a2/Ripk2/Tlr1/Hspb1/Ccr2/Cd2	21
GO:0050854	regulation of antigen receptor-mediated signaling pathway	11/1197	57/23210	0.000135617	0.00157043	0.0011133	Slc39a10/Lyn/Usp12/Ptprc/Nfam1/Ptpn6/Plcl2/Malt1/Lpxn/Kcnn4/Btnl2	11
GO:0021915	neural tube development	23/1197	191/23210	0.000139109	0.00160372	0.0011369	Plxnb2/Sall1/Lmo4/Rock2/Bmp7/Atp6ap2/Vasp/Gas1/Ssbp3/Tgfb1/Hes1/Apaf1/Casp8/Dact1/Kif20b/Tcf7/Sfrp2/Sema3c/Stil/Epha2/Bmp5/Inka1/Adm	23
GO:0045910	negative regulation of DNA recombination	10/1197	48/23210	0.000139401	0.00160372	0.0011369	Smchd1/Msh6/Blm/Polq/Rad18/Ankle1/Parpbp/Rmi2/Cgas/Radx	10
GO:0090342	regulation of cell aging	10/1197	48/23210	0.000139401	0.00160372	0.0011369	Nampt/Plk2/March5/Map3k3/Foxm1/Nuak1/Cdk6/Rbl1/Fbxo5/Cgas	10
GO:2000042	negative regulation of double-strand break repair via homologous recombination	6/1197	17/23210	0.000140614	0.00161416	0.0011443	Smchd1/Polq/Parpbp/Rmi2/Cgas/Radx	6
GO:0031109	microtubule polymerization or depolymerization	17/1197	120/23210	0.000143462	0.0016433	0.00116496	Cdk5rap2/Stmn1/Clip1/Cep192/Ckap2/Kif18b/Kif2c/Psrc1/Mid1/Cenpj/Kif18a/Fbxo5/Ska3/Ccsap/Kif24/Met/Ska1	17
GO:0032640	tumor necrosis factor production	21/1197	167/23210	0.000145174	0.00165089	0.00117034	Zfp36/Sirpa/Cx3cr1/Vsir/Akap12/Ifngr1/Ube2j1/Ccr5/Cd34/Ptprc/Syk/Ptpn6/Ptafr/Sash3/Tlr9/Clec4a2/Ripk2/Tlr1/Hspb1/Ccr2/Cd2	21
GO:0045216	cell-cell junction organization	21/1197	167/23210	0.000145174	0.00165089	0.00117034	Csf1r/Flna/Actn4/Tgfbr1/Lims1/Rab8b/Rock2/Cxadr/Pmp22/Afdn/Heg1/Tgfb1/Cdh4/Pecam1/Ect2/Bmp6/Gjb2/Epha2/Ceacam1/Gja5/Cdh3	21
GO:0051494	negative regulation of cytoskeleton organization	20/1197	155/23210	0.000145373	0.00165089	0.00117034	Tpm1/Wasf2/Cdk5rap2/Evl/Stmn1/Pecam1/Ckap2/Phldb2/Kifc1/Ccnf/Mdm1/Was/Tmod1/Nek2/Mid1/Kank4/Plekhh2/Met/Espn/Spta1	20
GO:0006312	mitotic recombination	7/1197	24/23210	0.000152044	0.00172295	0.00122142	Rad50/Brca2/Blm/Rad51/Gen1/Ankle1/Rad51c	7
GO:0002687	positive regulation of leukocyte migration	19/1197	144/23210	0.000157008	0.00177539	0.0012586	Lgmn/P2ry12/Adam10/Nckap1l/Mapk14/Mdk/Ano6/Tgfb1/Dock8/Camk1d/Pecam1/Itga4/Rac2/Ptafr/Edn3/Itgb3/Ccr2/Adora3/Madcam1	19
GO:0007596	blood coagulation	20/1197	156/23210	0.000158822	0.0017906	0.00126939	Pdgfra/P2ry12/Evl/Entpd1/Lyn/Sh2b3/Ano6/Pros1/Cd34/Lyst/Syk/Ptpn6/Pdgfb/Ubash3b/Rab27a/Tfpi/Ceacam1/Itgb3/Procr/P2rx1	20
GO:0042089	cytokine biosynthetic process	17/1197	121/23210	0.000159029	0.0017906	0.00126939	Egr1/Zfp36/Cx3cr1/Inpp5d/Akap12/Ube2j1/Ptprc/Syk/Tlr7/Ptafr/Icosl/Tlr9/Tlr1/Hspb1/Ccr2/Irf4/Cd28	17
GO:0032663	regulation of interleukin-2 production	11/1197	58/23210	0.000159645	0.00179372	0.0012716	Zfp36/Cd34/Ptprc/Malt1/Sash3/Ripk2/Ceacam1/Ccr2/Irf4/Btnl2/Cd28	11
GO:0007249	I-kappaB kinase/NF-kappaB signaling	23/1197	193/23210	0.00016268	0.00182395	0.00129303	Sirpa/Cx3cr1/Nfkbia/Akap13/Rock2/Dab2ip/Esr1/Tlr7/Nup62/Casp8/Tifab/Malt1/Map3k14/Eda2r/Tlr9/Btk/Relb/Ripk2/Pidd1/Ticam2/Hspb1/Card6/Capn3	23
GO:0046638	positive regulation of alpha-beta T cell differentiation	10/1197	49/23210	0.00016713	0.00186988	0.00132558	Nckap1l/Nfkbiz/Tgfbr2/Syk/Ikzf1/Malt1/Sash3/Ripk2/Ccr2/Il2rg	10
GO:1902115	regulation of organelle assembly	24/1197	206/23210	0.000168117	0.00187696	0.0013306	Msn/Akap13/Smc1a/Smc3/Cdk5rap2/Stag1/Cnot6l/Lcp1/Pip4k2a/Mef2c/Plk2/Cdkl5/Cep192/Nup62/Spag5/Plk1/Cep135/Plk4/Mdm1/Sdc1/Mns1/Cenpj/Stil/Ccsap	24
GO:0032743	positive regulation of interleukin-2 production	8/1197	32/23210	0.000169471	0.00188808	0.00133849	Ptprc/Malt1/Sash3/Ripk2/Ccr2/Irf4/Btnl2/Cd28	8
GO:0031099	regeneration	19/1197	145/23210	0.00017211	0.00191345	0.00135648	Jun/Ccnd1/Inpp5f/Mapk14/Mdk/Bcl9/Tgfb1/Mtr/Cflar/Itpr1/Kremen1/Cdk1/Cdkn1a/Dhfr/Rtn4rl1/Aurka/Adm/Capn3/Klk8	19
GO:0061448	connective tissue development	30/1197	285/23210	0.000176745	0.00196087	0.00139009	Egr1/Tgfbr1/Maf/Bmp7/Tgfbr2/Mapk14/Lrp5/Mdk/Mef2c/Vwa1/Il6ra/Tgfb1/Arrdc3/Cflar/Slc25a25/Frzb/Paxip1/Creb5/Pdgfb/Rflnb/Vit/Bmp6/Sfrp2/Col2a1/Bmp5/Itgb3/Rarb/Rflna/Pthlh/Umodl1	30
GO:0034504	protein localization to nucleus	29/1197	272/23210	0.000180655	0.00199588	0.00141491	Flna/Txnip/Nfkbia/Xpo1/Hdgf/Bmp7/Rangap1/Mapk14/Sun2/Nup153/Cd2ap/Kpna2/Tgfb1/Morc3/Tek/Syk/Cdk1/Hcls1/Nup62/Cdkn1a/Sesn2/Ect2/Nup107/Plk1/Pola2/Rassf5/Mdfic/Hhex/Bard1	29
GO:0002702	positive regulation of production of molecular mediator of immune response	15/1197	100/23210	0.000182559	0.00201271	0.00142684	Nsd2/Mapk14/Sema7a/Tgfb1/Paxip1/Tek/Ptprc/Stat6/Atad5/Foxp1/Malt1/Sash3/Tlr9/Ceacam1/Cd28	15
GO:0071706	tumor necrosis factor superfamily cytokine production	21/1197	170/23210	0.000186713	0.00205423	0.00145628	Zfp36/Sirpa/Cx3cr1/Vsir/Akap12/Ifngr1/Ube2j1/Ccr5/Cd34/Ptprc/Syk/Ptpn6/Ptafr/Sash3/Tlr9/Clec4a2/Ripk2/Tlr1/Hspb1/Ccr2/Cd2	21
GO:0051781	positive regulation of cell division	13/1197	79/23210	0.00018875	0.00207233	0.00146911	Racgap1/Mdk/Tgfb1/Nup62/Pdgfb/Ect2/Cdc25b/Kif23/Aurkb/Kif20b/Kif14/Tal1/Cdc6	13
GO:0007266	Rho protein signal transduction	23/1197	195/23210	0.000189721	0.00207869	0.00147361	Rhob/Akap13/Rock2/Rhoq/Spata13/Stmn1/Heg1/Tiam1/Pecam1/Vav1/Arhgef6/Arhgdib/Baiap2/Ect2/Rac2/Was/Lpar6/Arhgef39/Met/Gpr35/Lpar2/P2ry10b/Ccdc125	23
GO:0043299	leukocyte degranulation	12/1197	69/23210	0.000193115	0.0021115	0.00149687	Lyn/Syk/Itgam/Myo1f/Itgb2/Rac2/Ptafr/Rab27a/Btk/Foxf1/Ccr2/Adora3	12
GO:0031663	lipopolysaccharide-mediated signaling pathway	10/1197	50/23210	0.000199357	0.00217077	0.00153889	Nfkbia/Mapk14/Lyn/Trib1/Ly86/Tgfb1/Cd180/Malt1/Bmp6/Ripk2	10
GO:0045124	regulation of bone resorption	10/1197	50/23210	0.000199357	0.00217077	0.00153889	Csf1r/Trf/Tmem119/Inpp5d/Tmem64/Syk/Ubash3b/Tnfrsf11a/Ceacam1/Itgb3	10
GO:0110110	positive regulation of animal organ morphogenesis	15/1197	101/23210	0.000204341	0.00221593	0.0015709	Pdgfra/Tgfbr1/Sall1/Spry1/Bmp7/Tgfbr2/Mdk/Tgfb1/Jag1/Cd34/Cflar/Itpr1/B4galt1/Sema3c/Wnt6	15
GO:0050817	coagulation	20/1197	159/23210	0.000205963	0.00222895	0.00158014	Pdgfra/P2ry12/Evl/Entpd1/Lyn/Sh2b3/Ano6/Pros1/Cd34/Lyst/Syk/Ptpn6/Pdgfb/Ubash3b/Rab27a/Tfpi/Ceacam1/Itgb3/Procr/P2rx1	20
GO:2000027	regulation of animal organ morphogenesis	24/1197	209/23210	0.000209639	0.00226349	0.00160462	Pdgfra/Tgfbr1/Sall1/Lims1/Spry1/Bmp7/Tgfbr2/Mdk/Nkd1/Esr1/Tgfb1/Jag1/Cd34/Cflar/Itpr1/Hes1/B4galt1/Dact1/Sfrp2/Sema3c/Ceacam1/Met/Wnt6/Sp6	24
GO:0007100	mitotic centrosome separation	5/1197	12/23210	0.000211293	0.00226349	0.00160462	Kif11/Nup62/Nek2/Aurka/Chek1	5
GO:0007135	meiosis II	5/1197	12/23210	0.000211293	0.00226349	0.00160462	Bub1b/Bub1/Sgo2a/Mastl/Rad51c	5
GO:0043312	neutrophil degranulation	5/1197	12/23210	0.000211293	0.00226349	0.00160462	Syk/Itgam/Myo1f/Itgb2/Ptafr	5
GO:0061983	meiosis II cell cycle process	5/1197	12/23210	0.000211293	0.00226349	0.00160462	Bub1b/Bub1/Sgo2a/Mastl/Rad51c	5
GO:0040001	establishment of mitotic spindle localization	8/1197	33/23210	0.000213661	0.00228424	0.00161933	Spry1/Cdk5rap2/Nusap1/Cenpa/Mad2l1/Plk1/Ndc80/Spdl1	8
GO:2000134	negative regulation of G1/S transition of mitotic cell cycle	11/1197	60/23210	0.00021866	0.00233297	0.00165387	Ccnd1/Rfwd3/Cdkn1a/Rbl1/Jade1/Dact1/Rpa2/Pidd1/E2f7/Haspin/Cdkn2b	11
GO:0002700	regulation of production of molecular mediator of immune response	19/1197	148/23210	0.000225331	0.0023993	0.0017009	Nsd2/Vsir/Mapk14/Sema7a/Tgfb1/Paxip1/Tek/Tnfrsf1b/Ptprc/Stat6/Atad5/Foxp1/Malt1/Sash3/Tlr9/Ceacam1/Cgas/Ccr2/Cd28	19
GO:0030900	forebrain development	37/1197	386/23210	0.000228006	0.00242291	0.00171764	Csf1r/Cx3cr1/Pou3f3/Btg2/P2ry12/Myh10/Srgap2/Sall1/Tra2b/Zbtb18/Mboat7/Dab2ip/Tacc1/Sun2/Afdn/Mdk/Sema7a/Aspm/Akna/Pou3f1/Tacc3/Ikzf1/Gsx1/Hes1/Apaf1/Hprt/Cdon/Dct/Wdr62/Rtn4rl1/Kif14/Uchl5/Disc1/E2f1/Hhex/Stil/Rarb	37
GO:0042107	cytokine metabolic process	17/1197	125/23210	0.000237012	0.00251356	0.0017819	Egr1/Zfp36/Cx3cr1/Inpp5d/Akap12/Ube2j1/Ptprc/Syk/Tlr7/Ptafr/Icosl/Tlr9/Tlr1/Hspb1/Ccr2/Irf4/Cd28	17
GO:0050864	regulation of B cell activation	28/1197	264/23210	0.000252523	0.00267271	0.00189472	Zfp36l2/Nsd2/Nckap1l/Slc39a10/Inpp5d/Lyn/Mef2c/Atm/Tgfb1/Paxip1/Ptprc/Syk/Nfam1/Ptpn6/Stat6/Cdkn1a/Atad5/Sash3/Gpr183/Tnfrsf13b/Tlr9/Btk/Bank1/Samsn1/Il2rg/Ikzf3/Cd28/Btla	28
GO:0051058	negative regulation of small GTPase mediated signal transduction	11/1197	61/23210	0.000254488	0.00268526	0.00190362	Rasa3/Spry1/Dab2ip/Cd2ap/Stmn1/Heg1/Cgnl1/Nup62/Sh3bp1/Met/Ccdc125	11
GO:0002224	toll-like receptor signaling pathway	15/1197	103/23210	0.000254724	0.00268526	0.00190362	Nfkbia/Unc93b1/Dab2ip/Rps6ka3/Lyn/Esr1/Tlr7/Tlr13/Cd86/Tlr9/Ripk2/Tlr1/Mapkapk3/Ticam2/Irf4	15
GO:0050679	positive regulation of epithelial cell proliferation	23/1197	199/23210	0.000255969	0.00269302	0.00190912	Jun/Ccnd1/Ccnd2/Sp1/Cxadr/Mdk/Hmgb2/Gas1/Esr1/Tgfb1/Cflar/Itpr1/Rreb1/Aplnr/B4galt1/Pdgfb/Itga4/Iqgap3/Foxp1/Bmp6/Bmp5/Itgb3/Cdh3	23
GO:0072574	hepatocyte proliferation	7/1197	26/23210	0.000263948	0.00276597	0.00196084	Mki67/Lims1/Mdk/Rps6ka1/Cflar/Itpr1/Ceacam1	7
GO:0072575	epithelial cell proliferation involved in liver morphogenesis	7/1197	26/23210	0.000263948	0.00276597	0.00196084	Mki67/Lims1/Mdk/Rps6ka1/Cflar/Itpr1/Ceacam1	7
GO:0050869	negative regulation of B cell activation	8/1197	34/23210	0.000266873	0.00279109	0.00197864	Inpp5d/Lyn/Atm/Tnfrsf13b/Btk/Bank1/Samsn1/Btla	8
GO:0045580	regulation of T cell differentiation	19/1197	150/23210	0.000268347	0.00280097	0.00198565	Vsir/Nckap1l/Nfkbiz/Tgfbr2/Mdk/Tgfb1/Ptprc/Syk/Ikzf1/Fanca/Malt1/Sash3/Fancd2/Il1rl2/Ripk2/Il7r/Ccr2/Il2rg/Cd28	19
GO:2000116	regulation of cysteine-type endopeptidase activity	25/1197	226/23210	0.000279716	0.00290247	0.0020576	Lgmn/Arl6ip1/Asph/Rps6ka3/Rps6ka1/Cflar/Herpud1/Syk/Apaf1/Casp8ap2/Casp8/Birc5/Cast/Bcl2l11/Malt1/Sfrp2/Bbc3/Ripk2/Pidd1/Ret/Pmaip1/Tfap4/P2rx1/Nlrp1b/Fcmr	25
GO:0030889	negative regulation of B cell proliferation	6/1197	19/23210	0.000282029	0.00290935	0.00206248	Inpp5d/Lyn/Atm/Tnfrsf13b/Btk/Btla	6
GO:2000269	regulation of fibroblast apoptotic process	6/1197	19/23210	0.000282029	0.00290935	0.00206248	Btg1/Stk17b/Pik3cg/Xrcc2/Bcl2l11/Ddias	6
GO:2000773	negative regulation of cellular senescence	6/1197	19/23210	0.000282029	0.00290935	0.00206248	Nampt/Plk2/Map3k3/Cdk6/Rbl1/Fbxo5	6
GO:0051592	response to calcium ion	17/1197	127/23210	0.000287181	0.00295673	0.00209607	Fos/Jun/Lgmn/Junb/Jund/Hnrnpd/Mef2a/Iqgap1/Asph/Mef2c/Nfatc3/Itpr3/Ect2/Cpne8/Apobec1/Syt15/Capn3	17
GO:0001763	morphogenesis of a branching structure	26/1197	240/23210	0.000296844	0.00305028	0.00216239	Pdgfra/Sall1/Spry1/Bmp7/Tgfbr2/Lrp5/Mdk/Esr1/Ctsh/Tgfb1/Tek/Nfatc3/Nfatc1/Npnt/B4galt1/Pdgfb/Lama1/Timeless/Sfrp2/Sema3c/Hhex/Epha2/Met/Wnt6/Foxf1/Adm	26
GO:0033673	negative regulation of kinase activity	24/1197	214/23210	0.000299205	0.00306859	0.00217537	Actb/Dusp6/Spry1/Bmp7/Dab2ip/Lrp5/Lyn/Trib1/Sh2b3/Rgs2/Heg1/Ptprc/Ptpn6/Cdkn2c/Nup62/Cdkn1a/Ubash3b/Plk1/Mvp/Sfrp2/Hhex/Ceacam1/Tfap4/Hspb1	24
GO:0003279	cardiac septum development	17/1197	128/23210	0.000315548	0.00321749	0.00228093	Nsd2/Myh10/Tgfbr1/Sall1/Lmo4/Bmp7/Tgfbr2/Heg1/Jag1/Sav1/Nfatc1/Hes1/Sema3c/Bmp5/Gja5/Rarb/Dnah11	17
GO:1901343	negative regulation of vasculature development	17/1197	128/23210	0.000315548	0.00321749	0.00228093	Sparc/Cx3cr1/Dnmt1/Rock2/Bmp7/Pde3b/Dab2ip/Plk2/Tek/Nfatc3/Nfatc1/Pdgfb/Ecscr/Emilin1/Hhex/Epha2/Ccr2	17
GO:0001570	vasculogenesis	14/1197	94/23210	0.000319412	0.00325063	0.00230442	Junb/Tgfbr2/Heg1/Tgfb1/Foxm1/Cd34/Paxip1/Tek/Aplnr/Hhex/Epha2/Ceacam1/Foxf1/Adm	14
GO:0035265	organ growth	24/1197	215/23210	0.000320702	0.0032575	0.00230929	Pdgfra/Tgfbr1/Akap13/Dusp6/Cxadr/Tgfbr2/Mapk14/Mef2c/Rgs2/Vwa1/Esr1/Heg1/Ccnb1/Sav1/Cdk1/Vit/Ctdp1/Foxp1/Bcl2l11/Sash3/Rarb/Bnc2/Plag1/Rln1	24
GO:0046606	negative regulation of centrosome cycle	5/1197	13/23210	0.000328785	0.00332452	0.0023568	Cdk5rap2/Kifc1/Ccnf/Mdm1/Nek2	5
GO:0051299	centrosome separation	5/1197	13/23210	0.000328785	0.00332452	0.0023568	Kif11/Nup62/Nek2/Aurka/Chek1	5
GO:0042063	gliogenesis	32/1197	323/23210	0.000329659	0.00332452	0.0023568	Csf1r/Hexb/P2ry12/Vim/Trf/Srgap2/Exoc4/Mboat7/Dab2ip/Pmp22/Sun2/Afdn/Mdk/Lyn/Ifngr1/Tgfb1/Tiam1/Pou3f1/Tnfrsf1b/Cdk6/Itgam/Hes1/Pdgfb/Nab2/Tal1/Gpr183/Disc1/E2f1/Adgrg6/Ccr2/Cdkn2b/Plag1	32
GO:0016572	histone phosphorylation	8/1197	35/23210	0.000330441	0.00332452	0.0023568	Fmr1/Ccna2/Atm/Cdk2/Ccnb1/Vrk1/Aurkb/Haspin	8
GO:0021846	cell proliferation in forebrain	8/1197	35/23210	0.000330441	0.00332452	0.0023568	Pou3f3/Tacc1/Akna/Tacc3/Dct/Kif14/Disc1/Hhex	8
GO:0002637	regulation of immunoglobulin production	12/1197	73/23210	0.000333234	0.00334625	0.00237221	Nsd2/Tgfb1/Paxip1/Ptprc/Stat6/Atad5/Foxp1/Sash3/Tlr9/Ceacam1/Cgas/Cd28	12
GO:0002335	mature B cell differentiation	7/1197	27/23210	0.000340572	0.00339343	0.00240566	Dock11/Nfatc1/Pou2f2/Plcl2/Cmtm7/Malt1/Gpr183	7
GO:0008340	determination of adult lifespan	7/1197	27/23210	0.000340572	0.00339343	0.00240566	Inpp5d/Atm/Msh6/Bbc3/Rad54l/Rad54b/Cgas	7
GO:0045830	positive regulation of isotype switching	7/1197	27/23210	0.000340572	0.00339343	0.00240566	Nsd2/Tgfb1/Paxip1/Ptprc/Stat6/Atad5/Cd28	7
GO:0042093	T-helper cell differentiation	11/1197	63/23210	0.000341139	0.00339343	0.00240566	Nfkbiz/Tgfb1/Stat6/Foxp1/Malt1/Gpr183/Relb/Ripk2/Ccr2/Irf4/Slamf6	11
GO:0050866	negative regulation of cell activation	23/1197	203/23210	0.000341801	0.00339365	0.00240581	Pdgfra/Vsir/Inpp5d/Mdk/Lyn/Sh2b3/Atm/Tgfb1/Ptpn6/Pdgfb/Ubash3b/Cd86/Tnfrsf13b/Emilin1/Btk/Tnfaip8l2/Enpp3/Ceacam1/Bank1/Samsn1/Foxf1/Ccr2/Btla	23
GO:0006816	calcium ion transport	39/1197	423/23210	0.000344804	0.00341704	0.00242239	P2ry12/Atp2b1/Tspan13/Tpcn1/Fmr1/Asph/Lyn/Ano6/Ccr5/Tgfb1/Slc25a25/P2ry6/Nfatc3/Ptprc/Itpr1/Nfatc1/Pik3cg/Ptpn6/Aplnr/Hes1/Pdgfb/Ubash3b/Itpr3/Plcb2/Atp2a3/Il16/Trpv2/Tlr9/Bbc3/Srl/Cysltr1/Itgb3/Tmem37/P2rx1/Gpr35/Capn3/Kcnn4/Ms4a1/Trpm1	39
GO:0070527	platelet aggregation	9/1197	44/23210	0.000345888	0.00342139	0.00242547	Pdgfra/P2ry12/Lyn/Sh2b3/Syk/Ptpn6/Ubash3b/Ceacam1/Itgb3	9
GO:0042692	muscle cell differentiation	37/1197	395/23210	0.000357089	0.00352559	0.00249934	Pdgfra/H3f3b/Myh9/Myh10/Dnmt1/Akap13/Mef2a/Sort1/Cxadr/Tmem119/Pmp22/Mapk14/Plekho1/Mef2c/Bcl9/Cd53/Rgs2/Bnip2/Tgfb1/Cflar/Nfatc3/Efnb2/Nfatc1/Hes1/Npnt/Bhlhe41/Pdgfb/Ctdp1/Itga8/Cdon/Foxp1/Tmod1/Met/Rarb/Foxf1/Adm/Capn3	37
GO:2000573	positive regulation of DNA biosynthetic process	12/1197	74/23210	0.000379342	0.00373832	0.00265015	Hnrnpd/Atm/Rfc2/Pdgfb/Aurkb/Rfc3/Rfc5/Cyp1b1/Nek2/Chtf18/Rfc4/Dscc1	12
GO:1903034	regulation of response to wounding	21/1197	179/23210	0.000380521	0.00374297	0.00265345	Pdgfra/Myh9/Inpp5f/Mdk/Lyn/Sh2b3/Ano6/Pros1/Cd34/Syk/Rreb1/Kremen1/Phldb2/Cdkn1a/Pdgfb/Ubash3b/Rtn4rl1/Tfpi/Ceacam1/Capn3/Klk8	21
GO:0032495	response to muramyl dipeptide	6/1197	20/23210	0.000385397	0.00376991	0.00267254	Vim/Nfkbia/Mapk14/Jag1/Irf5/Ripk2	6
GO:0050434	positive regulation of viral transcription	6/1197	20/23210	0.000385397	0.00376991	0.00267254	Jun/Nucks1/Sp1/Ctdp1/Mdfic/Tfap4	6
GO:1904994	regulation of leukocyte adhesion to vascular endothelial cell	6/1197	20/23210	0.000385397	0.00376991	0.00267254	Mdk/Ets1/Itga4/Itgb2/Ptafr/Ccr2	6
GO:0002294	CD4-positive, alpha-beta T cell differentiation involved in immune response	11/1197	64/23210	0.000393008	0.00380694	0.0026988	Nfkbiz/Tgfb1/Stat6/Foxp1/Malt1/Gpr183/Relb/Ripk2/Ccr2/Irf4/Slamf6	11
GO:0002763	positive regulation of myeloid leukocyte differentiation	11/1197	64/23210	0.000393008	0.00380694	0.0026988	Fos/Csf1r/Jun/Trib1/Tgfb1/Tmem64/Ikzf1/Hcls1/Klf10/Casp8/Itgb3	11
GO:0042267	natural killer cell mediated cytotoxicity	11/1197	64/23210	0.000393008	0.00380694	0.0026988	Lyst/Vav1/Ptpn6/Rab27a/Ceacam1/Ulbp1/Slamf6/Raet1a/Raet1b/Raet1c/Raet1d	11
GO:0090398	cellular senescence	11/1197	64/23210	0.000393008	0.00380694	0.0026988	Nampt/Mapk14/Plk2/Map3k3/Nuak1/Cdk6/Cdkn1a/Rbl1/Fbxo5/Cgas/Cdkn2b	11
GO:2000514	regulation of CD4-positive, alpha-beta T cell activation	11/1197	64/23210	0.000393008	0.00380694	0.0026988	Vsir/Nckap1l/Nfkbiz/Tgfbr2/Tgfb1/Malt1/Sash3/Ripk2/Ceacam1/Ccr2/Il2rg	11
GO:0002819	regulation of adaptive immune response	23/1197	205/23210	0.000393499	0.00380694	0.0026988	Nsd2/Vsir/Nfkbiz/Mef2c/Il6ra/Adcy7/Tgfb1/Paxip1/Tnfrsf1b/Ptprc/Ptpn6/Stat6/Atad5/Was/Malt1/Sash3/Btk/Ripk2/Il7r/Samsn1/Ccr2/H2-Q10/Cd28	23
GO:0045926	negative regulation of growth	27/1197	258/23210	0.000399111	0.00385418	0.00273229	Lgmn/Adam15/Dab2ip/Cxadr/Tgfbr2/Rgs2/Gas1/Ccr5/Nkd1/Sema7a/Tgfb1/Frzb/Sav1/Cdkn2c/Cdkn1a/Sesn2/Crlf3/Sema3g/Ctdp1/Foxp1/Sfrp2/Enpp1/Psrc1/Bbc3/Sema3c/Sertad1/Fstl4	27
GO:0051294	establishment of spindle orientation	8/1197	36/23210	0.000405826	0.00390478	0.00276816	Spry1/Cdk5rap2/Cenpa/Spag5/Mad2l1/Plk1/Ndc80/Spdl1	8
GO:0098751	bone cell development	8/1197	36/23210	0.000405826	0.00390478	0.00276816	Wasf2/Pip4k2a/Zfp385a/Sh2b3/Ptpn6/Fli1/Lrrk1/Tal1	8
GO:0021543	pallium development	19/1197	155/23210	0.000408572	0.00392407	0.00278183	Cx3cr1/Pou3f3/Btg2/P2ry12/Srgap2/Tra2b/Zbtb18/Mboat7/Dab2ip/Tacc1/Sun2/Afdn/Mdk/Aspm/Tacc3/Cdon/Wdr62/Kif14/Disc1	19
GO:0030890	positive regulation of B cell proliferation	9/1197	45/23210	0.000412795	0.00395029	0.00280042	Nckap1l/Slc39a10/Mef2c/Ptprc/Cdkn1a/Atad5/Sash3/Gpr183/Tlr9	9
GO:0031952	regulation of protein autophosphorylation	9/1197	45/23210	0.000412795	0.00395029	0.00280042	Jun/Iqgap1/Ptprc/Syk/Pdgfb/Mre11a/Rad50/Mvp/Enpp1	9
GO:0045589	regulation of regulatory T cell differentiation	7/1197	28/23210	0.000434032	0.00413111	0.00292861	Vsir/Mdk/Tgfb1/Fanca/Fancd2/Il2rg/Cd28	7
GO:0072576	liver morphogenesis	7/1197	28/23210	0.000434032	0.00413111	0.00292861	Mki67/Lims1/Mdk/Rps6ka1/Cflar/Itpr1/Ceacam1	7
GO:0022412	cellular process involved in reproduction in multicellular organism	40/1197	443/23210	0.000443661	0.00421199	0.00298595	H3f3b/Hexb/Abhd2/Tgfbr1/Top2a/Cxadr/Tmem119/Mdk/Hmgb2/Ube2j1/Hpgds/Atm/Aspm/Tgfb1/Ccnb1/Diaph2/Prdx4/Mybl1/Ncaph/Cdc25b/Cep57/Plk1/Larp7/Fanca/Brca2/Sgo2a/Ttk/Fignl1/Aurka/Chtf18/Mastl/Fancc/Kif18a/Fbxo5/Lgr5/Trip13/Brip1/Rad51c/Ddias/Tex15	40
GO:0030278	regulation of ossification	25/1197	233/23210	0.000444122	0.00421199	0.00298595	Jund/Atp2b1/Bmp7/Tmem119/Mapk14/Lrp5/Mdk/Mef2c/Ano6/Bmp2k/Clic1/Tgfb1/Fndc3b/Jag1/Tmem64/Nfatc1/Cdk6/Kremen1/Npnt/Rflnb/Bmp6/Sfrp2/Enpp1/Fbxo5/Rflna	25
GO:0060411	cardiac septum morphogenesis	13/1197	86/23210	0.000446043	0.00422265	0.0029935	Nsd2/Tgfbr1/Bmp7/Tgfbr2/Jag1/Sav1/Nfatc1/Hes1/Sema3c/Bmp5/Gja5/Rarb/Dnah11	13
GO:0002062	chondrocyte differentiation	16/1197	120/23210	0.000447815	0.00423185	0.00300002	Tgfbr1/Maf/Tgfbr2/Mapk14/Mdk/Mef2c/Vwa1/Tgfb1/Rflnb/Vit/Bmp6/Sfrp2/Col2a1/Rarb/Rflna/Pthlh	16
GO:0050732	negative regulation of peptidyl-tyrosine phosphorylation	10/1197	55/23210	0.00044933	0.00423344	0.00300115	Inpp5f/Sh2b3/Suz12/Pecam1/Ptprc/Ptpn6/Lrrk1/Mvp/Sfrp2/Samsn1	10
GO:0030308	negative regulation of cell growth	22/1197	194/23210	0.000449583	0.00423344	0.00300115	Adam15/Dab2ip/Rgs2/Gas1/Ccr5/Sema7a/Tgfb1/Frzb/Cdkn2c/Cdkn1a/Sesn2/Crlf3/Sema3g/Ctdp1/Foxp1/Sfrp2/Enpp1/Psrc1/Bbc3/Sema3c/Sertad1/Fstl4	22
GO:0002293	alpha-beta T cell differentiation involved in immune response	11/1197	65/23210	0.000451333	0.00423794	0.00300434	Nfkbiz/Tgfb1/Stat6/Foxp1/Malt1/Gpr183/Relb/Ripk2/Ccr2/Irf4/Slamf6	11
GO:0097529	myeloid leukocyte migration	23/1197	207/23210	0.000451921	0.00423794	0.00300434	Lgmn/Sirpa/Cx3cr1/P2ry12/Nckap1l/Cxadr/Mapk14/Mdk/Lyn/Ano6/Mtus1/Camk1d/Pecam1/Syk/Itgam/Vav1/Pdgfb/Itgb2/Rac2/Emilin1/Edn3/Ccr2/Gpr35	23
GO:0002708	positive regulation of lymphocyte mediated immunity	18/1197	144/23210	0.000452464	0.00423794	0.00300434	Nsd2/Tgfb1/Paxip1/Ptprc/Vav1/Stat6/Atad5/Malt1/Sash3/Btk/Ulbp1/Slamf6/Raet1a/Raet1b/Raet1c/Raet1d/H2-Q10/Cd28	18
GO:0033002	muscle cell proliferation	25/1197	234/23210	0.000473466	0.00442683	0.00313824	Egr1/Jun/Dnmt1/Tgfbr1/Nampt/Igfbp3/Cxadr/Tgfbr2/Mapk14/Mef2c/Trib1/Esr1/Il6ra/Cflar/Ccnb1/P2ry6/Sav1/Cdk1/Cdkn1a/Pdgfb/Ptafr/Foxp1/Skp2/Itgb3/Orc1	25
GO:0042271	susceptibility to natural killer cell mediated cytotoxicity	5/1197	14/23210	0.000489775	0.00457123	0.00324061	Ulbp1/Raet1a/Raet1b/Raet1c/Raet1d	5
GO:0001782	B cell homeostasis	8/1197	37/23210	0.000494605	0.00460819	0.00326681	Nckap1l/Lyn/Mef2c/Pik3cd/Dock11/Bcl2l11/Tnfrsf13b/Gapt	8
GO:0006913	nucleocytoplasmic transport	29/1197	289/23210	0.000498382	0.00462709	0.00328021	Flna/Adam10/Txnip/Nfkbia/Xpo1/Akap13/Anp32a/Rangap1/Mapk14/Nup153/Kpna2/Tgfb1/Ctdspl2/Tek/Syk/Hcls1/Nup62/Cdkn1a/Ect2/Nup107/Inpp4b/Pola2/Aaas/Malt1/Mdfic/Hhex/Cchcr1/Bard1/Ankle1	29
GO:0051169	nuclear transport	29/1197	289/23210	0.000498382	0.00462709	0.00328021	Flna/Adam10/Txnip/Nfkbia/Xpo1/Akap13/Anp32a/Rangap1/Mapk14/Nup153/Kpna2/Tgfb1/Ctdspl2/Tek/Syk/Hcls1/Nup62/Cdkn1a/Ect2/Nup107/Inpp4b/Pola2/Aaas/Malt1/Mdfic/Hhex/Cchcr1/Bard1/Ankle1	29
GO:0009404	toxin metabolic process	6/1197	21/23210	0.000516142	0.00474746	0.00336554	Sp1/Pam/Sqor/Cyp1b1/Pon3/Acaa1b	6
GO:0044346	fibroblast apoptotic process	6/1197	21/23210	0.000516142	0.00474746	0.00336554	Btg1/Stk17b/Pik3cg/Xrcc2/Bcl2l11/Ddias	6
GO:0002228	natural killer cell mediated immunity	11/1197	66/23210	0.00051673	0.00474746	0.00336554	Lyst/Vav1/Ptpn6/Rab27a/Ceacam1/Ulbp1/Slamf6/Raet1a/Raet1b/Raet1c/Raet1d	11
GO:0002287	alpha-beta T cell activation involved in immune response	11/1197	66/23210	0.00051673	0.00474746	0.00336554	Nfkbiz/Tgfb1/Stat6/Foxp1/Malt1/Gpr183/Relb/Ripk2/Ccr2/Irf4/Slamf6	11
GO:0032623	interleukin-2 production	11/1197	66/23210	0.00051673	0.00474746	0.00336554	Zfp36/Cd34/Ptprc/Malt1/Sash3/Ripk2/Ceacam1/Ccr2/Irf4/Btnl2/Cd28	11
GO:0045739	positive regulation of DNA repair	11/1197	66/23210	0.00051673	0.00474746	0.00336554	Smchd1/Pcna/Slf2/Foxm1/Rnf168/Timeless/Ddx11/Spidr/Was/Blm/Slf1	11
GO:0002244	hematopoietic progenitor cell differentiation	19/1197	158/23210	0.000520184	0.00477091	0.00338217	Pdgfra/Csf1r/Sirpa/Top2a/Pld4/Ssbp3/Tgfb1/Tent2/Ptprc/Spi1/Cdk6/Ptpn6/Hes1/Anln/Tal1/Tnfrsf13b/Esco2/Ankle1/Ptprq	19
GO:0048538	thymus development	10/1197	56/23210	0.000522068	0.0047799	0.00338855	Tgfbr1/Lmo4/Ctc1/Atm/Nfatc3/Ikzf1/Hes1/Ccnb2/Bcl2l11/Tyr	10
GO:0048871	multicellular organismal homeostasis	43/1197	491/23210	0.000523932	0.00478869	0.00339477	Csf1r/Egr1/Epas1/Ctss/Trf/Cxadr/Ildr2/Tmem119/Inpp5d/Rpa1/Slc40a1/Ccr5/Stmn1/Ptgs1/Ctsh/Arrdc3/Prkab1/Cd34/Tmem64/Syk/Stat6/Ubash3b/Plcl2/Rac2/Prcp/Nanos1/Lrrk1/Mdm1/Bmp6/Sash3/Tnfrsf11a/Pask/Trpv2/Tlr9/Col2a1/Ceacam1/Itgb3/Met/Ccr2/Irf4/Cdh3/Tex15/Pthlh	43
GO:0031098	stress-activated protein kinase signaling cascade	29/1197	290/23210	0.000527162	0.0048099	0.00340981	Zfp36/Sirpa/Trf/Lmnb1/Dab2ip/Mapk14/Lyn/Trib1/Map3k3/Foxm1/Tiam1/Syk/Magi3/Pbk/Stk10/Dact1/Map3k20/Map3k14/Tnfrsf11a/Mdfic/Sfrp2/Eda2r/Tlr9/Mid1/Map3k8/Ripk2/Ceacam1/Met/Map4k1	29
GO:0001837	epithelial to mesenchymal transition	17/1197	134/23210	0.000542133	0.00493798	0.00350061	Flna/Tgfbr1/Bmp7/Adam15/Dab2ip/Tgfbr2/Mdk/Tgfb1/Jag1/Akna/Tiam1/Nfatc1/Phldb2/Rflnb/Ldlrad4/Sfrp2/Fam83d	17
GO:0006336	DNA replication-independent nucleosome assembly	7/1197	29/23210	0.000546874	0.00497261	0.00352516	Hjurp/Nasp/Hat1/Mis18a/Asf1b/Oip5/Cenpp	7
GO:0061180	mammary gland epithelium development	12/1197	77/23210	0.000551238	0.00499512	0.00354112	Ccnd1/Lrp5/Esr1/Tgfb1/Rreb1/Stat6/Iqgap3/Brca2/Epha2/Foxf1/Irf6/Pthlh	12
GO:0014706	striated muscle tissue development	40/1197	449/23210	0.000578571	0.00523384	0.00371035	Pdgfra/Fos/Egr1/Btg2/Tpm1/Myh10/Tgfbr1/Eln/Akap13/Mef2a/Bmp7/Mbnl1/Zbtb18/Cxadr/Tgfbr2/Pmp22/Mapk14/Mef2c/Bcl9/Rgs2/Cenpf/Heg1/Tgfb1/Cflar/Ccnb1/Nfatc3/Sav1/Efnb2/Cdk1/Ctdp1/Cdon/Casp8/Foxp1/Sema3c/Asb2/Bmp5/Gja5/Met/Rarb/Capn3	40
GO:0030595	leukocyte chemotaxis	23/1197	211/23210	0.000591878	0.00534508	0.00378921	Lgmn/Cx3cr1/Adam10/Nckap1l/Cxadr/Mapk14/Mdk/Lyn/Ano6/Mtus1/Lyst/Camk1d/Syk/Itgam/Vav1/Pdgfb/Itgb2/Rac2/Gpr183/Il16/Edn3/Ccr2/Gpr35	23
GO:0002237	response to molecule of bacterial origin	35/1197	377/23210	0.000597692	0.0053884	0.00381992	Zfp36/Jun/Junb/Sirpa/Cx3cr1/Jund/Vim/Nfkbia/Dab2ip/Mapk14/Rps6ka3/Hmgb2/Lyn/Mef2c/Trib1/Ly86/Tgfb1/Litaf/Tnfrsf1b/Cd180/Irf5/Cd86/Ptafr/Malt1/Bmp6/Tnfrsf11a/Tlr9/Ripk2/Tlr1/Mapkapk3/Ticam2/Adm/Raet1a/Raet1b/Raet1c	35
GO:0000726	non-recombinational repair	10/1197	57/23210	0.000604292	0.00543862	0.00385552	Nsd2/Dek/Smchd1/Lig1/Mre11a/Pola1/Rbbp8/Polq/Usp51/Aunip	10
GO:0110020	regulation of actomyosin structure organization	14/1197	100/23210	0.000608081	0.00546344	0.00387311	Tpm1/Tgfbr1/Wasf2/Akap13/Rock2/Evl/Mef2c/Stmn1/Phldb2/Ect2/Was/Kank4/Synpo/Met	14
GO:1902903	regulation of supramolecular fiber organization	33/1197	349/23210	0.000615464	0.0055204	0.00391349	Flna/Tpm1/Tgfbr1/Wasf2/Cotl1/Eln/Akap13/Nckap1l/Rock2/Cdk5rap2/Evl/Vasp/Mef2c/Stmn1/Clip1/Pecam1/Ckap2/Phldb2/Hcls1/Aebp1/Baiap2/Was/Tmod1/Emilin1/Psrc1/Mid1/Sh3bp1/Fmn1/Kank4/Plekhh2/Synpo/Met/Spta1	33
GO:0061515	myeloid cell development	12/1197	78/23210	0.000621392	0.00556414	0.0039445	Wasf2/Ptbp3/Pip4k2a/Zfp385a/Sh2b3/Arid4a/Itgam/Ptpn6/Fli1/Lrrk1/Tal1/Lyar	12
GO:0001649	osteoblast differentiation	22/1197	199/23210	0.000636912	0.00569347	0.00403619	H3f3b/Junb/Jund/Bmp7/Igfbp3/Tmem119/Lrp5/Mef2c/Clic1/Fndc3b/Jag1/Tmem64/Nfatc1/Cdk6/Npnt/Bmp6/Sfrp2/Fignl1/Fbxo5/Epha2/Clec5a/Pthlh	22
GO:0003007	heart morphogenesis	28/1197	280/23210	0.000651823	0.00581694	0.00412372	Jun/Flna/Tpm1/Nsd2/Tgfbr1/Bmp7/Adam15/Tgfbr2/Mef2c/Heg1/Tgfb1/Jag1/Tek/Sav1/Nfatc1/Hes1/Sfrp2/Sema3c/Col2a1/Stil/Adgrg6/Bmp5/Gja5/Rarb/Foxf1/Dnah11/Tbx6/Lefty1	28
GO:0045669	positive regulation of osteoblast differentiation	11/1197	68/23210	0.000671406	0.00596154	0.00422623	Jund/Bmp7/Tmem119/Lrp5/Mef2c/Clic1/Jag1/Npnt/Bmp6/Sfrp2/Fbxo5	11
GO:0046637	regulation of alpha-beta T cell differentiation	11/1197	68/23210	0.000671406	0.00596154	0.00422623	Nckap1l/Nfkbiz/Tgfbr2/Tgfb1/Syk/Ikzf1/Malt1/Sash3/Ripk2/Ccr2/Il2rg	11
GO:0072111	cell proliferation involved in kidney development	6/1197	22/23210	0.000678932	0.00600391	0.00425626	Egr1/Bmp7/Il6ra/Cflar/Pdgfb/Itgb3	6
GO:0000132	establishment of mitotic spindle orientation	7/1197	30/23210	0.00068185	0.00600391	0.00425626	Spry1/Cdk5rap2/Cenpa/Mad2l1/Plk1/Ndc80/Spdl1	7
GO:0042533	tumor necrosis factor biosynthetic process	7/1197	30/23210	0.00068185	0.00600391	0.00425626	Cx3cr1/Akap12/Ube2j1/Syk/Tlr1/Hspb1/Ccr2	7
GO:0042534	regulation of tumor necrosis factor biosynthetic process	7/1197	30/23210	0.00068185	0.00600391	0.00425626	Cx3cr1/Akap12/Ube2j1/Syk/Tlr1/Hspb1/Ccr2	7
GO:0043372	positive regulation of CD4-positive, alpha-beta T cell differentiation	7/1197	30/23210	0.00068185	0.00600391	0.00425626	Nckap1l/Nfkbiz/Malt1/Sash3/Ripk2/Ccr2/Il2rg	7
GO:0002286	T cell activation involved in immune response	15/1197	113/23210	0.000699121	0.00614576	0.00435682	Nfkbiz/Lcp1/Mdk/Tgfb1/Apbb1ip/Stat6/Foxp1/Malt1/Gpr183/Rab27a/Relb/Ripk2/Ccr2/Irf4/Slamf6	15
GO:0000212	meiotic spindle organization	5/1197	15/23210	0.000703578	0.00617469	0.00437733	Myh9/Aspm/Espl1/Aurka/Fbxo5	5
GO:0030336	negative regulation of cell migration	27/1197	268/23210	0.00072007	0.00629853	0.00446512	Rhob/Abhd2/Cx3cr1/Tpm1/Srgap2/Adam15/Evl/Dab2ip/Igfbp3/Afdn/Mef2c/Trib1/Ccr5/Trp53inp1/Tgfb1/Jag1/Phldb2/Arhgdib/Pdgfb/Ldlrad4/Erdr1/Cyp1b1/Rras/Sfrp2/Emilin1/Podn/Adora3	27
GO:0002449	lymphocyte mediated immunity	38/1197	425/23210	0.000732209	0.00639414	0.0045329	Nsd2/Vsir/Inpp5d/Ctsh/Tgfb1/Jag1/Lyst/Paxip1/Rnf168/Tnfrsf1b/Ptprc/Pou2f2/Msh6/Vav1/Ptpn6/Stat6/Hprt/Atad5/Was/Malt1/Sash3/Icosl/Rab27a/Btk/Ung/Exo1/Ceacam1/Il7r/Ccr2/Ulbp1/Slamf6/Raet1a/Raet1b/Raet1c/Raet1d/H2-Q10/Cd28/Gapt	38
GO:0034614	cellular response to reactive oxygen species	18/1197	150/23210	0.000739266	0.00644514	0.00456905	Pdgfra/Fos/Jun/Rhob/Sirpa/Hnrnpd/Mtr/Cflar/Fbln5/Stat6/Ect2/Foxp1/Dhfr/Cyp1b1/Btk/Fancc/Pde8a/Met	18
GO:0046683	response to organophosphorus	13/1197	91/23210	0.000774844	0.00673313	0.00477322	Jun/Junb/Jund/P2ry12/Rap1b/Asph/Cdk2/P2ry6/Hcn2/Itpr1/Pik3cg/Itpr3/P2rx1	13
GO:0002822	regulation of adaptive immune response based on somatic recombination of immune receptors built from immunoglobulin superfamily domains	21/1197	189/23210	0.000783313	0.00679556	0.00481747	Nsd2/Vsir/Nfkbiz/Mef2c/Il6ra/Tgfb1/Paxip1/Tnfrsf1b/Ptprc/Ptpn6/Stat6/Atad5/Was/Malt1/Sash3/Btk/Ripk2/Il7r/Ccr2/H2-Q10/Cd28	21
GO:0043300	regulation of leukocyte degranulation	9/1197	49/23210	0.000795422	0.00688931	0.00488394	Lyn/Syk/Itgam/Itgb2/Rac2/Ptafr/Foxf1/Ccr2/Adora3	9
GO:0097191	extrinsic apoptotic signaling pathway	24/1197	229/23210	0.0007996	0.00691419	0.00490157	Cx3cr1/Tgfbr1/Rock2/Sort1/Dab2ip/Mknk2/Hmgb2/Gas1/Tgfb1/Cflar/Tnfrsf1b/Ptprc/Acsl5/Casp8ap2/Casp8/Bcl2l11/Sfrp2/Col2a1/Itprip/Pidd1/Ret/Tnfrsf23/Tnfrsf10b/Fcmr	24
GO:0051148	negative regulation of muscle cell differentiation	10/1197	59/23210	0.000800954	0.0069146	0.00490186	Dnmt1/Tmem119/Rgs2/Cflar/Nfatc3/Nfatc1/Bhlhe41/Pdgfb/Ctdp1/Foxp1	10
GO:0060537	muscle tissue development	41/1197	472/23210	0.000818742	0.00705085	0.00499846	Pdgfra/Fos/Egr1/Btg2/Tpm1/Myh10/Tgfbr1/Eln/Akap13/Mef2a/Bmp7/Mbnl1/Zbtb18/Cxadr/Tgfbr2/Pmp22/Mapk14/Mef2c/Bcl9/Rgs2/Cenpf/Heg1/Tgfb1/Cflar/Ccnb1/Nfatc3/Sav1/Efnb2/Cdk1/Ctdp1/Itga8/Cdon/Casp8/Foxp1/Sema3c/Asb2/Bmp5/Gja5/Met/Rarb/Capn3	41
GO:0043149	stress fiber assembly	14/1197	103/23210	0.000820734	0.00705085	0.00499846	Tpm1/Tgfbr1/Itgb5/Wasf2/Eln/Rock2/Evl/Zyx/Stmn1/Phldb2/Was/Kank4/Synpo/Met	14
GO:0051209	release of sequestered calcium ion into cytosol	15/1197	115/23210	0.000841303	0.00720935	0.00511082	Asph/Lyn/Ccr5/Tgfb1/P2ry6/Ptprc/Itpr1/Ptpn6/Aplnr/Ubash3b/Itpr3/Plcb2/Bbc3/Itgb3/Capn3	15
GO:0045066	regulatory T cell differentiation	7/1197	31/23210	0.000841908	0.00720935	0.00511082	Vsir/Mdk/Tgfb1/Fanca/Fancd2/Il2rg/Cd28	7
GO:0071216	cellular response to biotic stimulus	30/1197	313/23210	0.00085602	0.00731835	0.00518809	Zfp36/Sirpa/Cx3cr1/Txnip/Vim/Nfkbia/Smc1a/Dab2ip/Mapk14/Lyn/Mef2c/Trib1/Ly86/Tgfb1/Litaf/Tnfrsf1b/Syk/Cd180/Cd86/Bcl2l11/Malt1/Bmp6/Btk/Ripk2/Tlr1/Ticam2/Eme1/Raet1a/Raet1b/Raet1c	30
GO:0046661	male sex differentiation	18/1197	152/23210	0.000864404	0.00736623	0.00522203	Pdgfra/H3f3b/Ccnd1/Flna/Tgfbr1/Hmgb2/Esr1/Arid4a/Aspm/Prdx4/Fanca/Bcl2l11/Bmp6/Sfrp2/Kif18a/Bmp5/Brip1/Tex15	18
GO:0071248	cellular response to metal ion	18/1197	152/23210	0.000864404	0.00736623	0.00522203	Fos/Jun/Lgmn/Junb/Jund/Trf/Mef2a/Iqgap1/Asph/Mef2c/Slc40a1/Adcy7/Nfatc3/Ect2/Cpne8/Bmp6/Syt15/Capn3	18
GO:0031331	positive regulation of cellular catabolic process	33/1197	356/23210	0.000866039	0.00736829	0.00522349	Zfp36/Btg2/Zfp36l2/Hnrnpd/Msn/Rock2/Tpcn1/Fmr1/Dab2ip/Igfbp3/Cnot6l/Pip4k2a/Edem1/Trib1/Plk2/Trp53inp1/Atm/Herpud1/Tnfrsf1b/Acsl5/Sesn2/Plk1/Tmem173/Dact1/Nanos1/Bcl2l11/Ecscr/Tlr9/Aurka/Cbfa2t3/Prr5l/Disc1/Ripk2	33
GO:0050818	regulation of coagulation	12/1197	81/23210	0.000878246	0.00745274	0.00528336	Pdgfra/Lyn/Sh2b3/Ano6/Pros1/Cd34/Syk/Pdgfb/Ubash3b/Tfpi/Ceacam1/Procr	12
GO:0022403	cell cycle phase	6/1197	23/23210	0.000878781	0.00745274	0.00528336	Dek/Nfatc1/Cdk6/Cdc20/Ttk/Chek2	6
GO:0050878	regulation of body fluid levels	32/1197	342/23210	0.000880659	0.00745672	0.00528618	Pdgfra/P2ry12/Ccnd1/Evl/Entpd1/Lyn/Zfp385a/Sh2b3/Ano6/Stmn1/Heg1/Pros1/Cd34/Lyst/Syk/Ptpn6/Aplnr/Pdgfb/Ubash3b/Tifab/Rab27a/Tfpi/Ceacam1/Gja5/Itgb3/Met/Procr/P2rx1/Adora3/Adm/Kcnn4/Chrm3	32
GO:0019827	stem cell population maintenance	19/1197	165/23210	0.000887614	0.0075036	0.00531942	Zfp36l2/Sall1/Smc1a/Bmp7/Smc3/Lrp5/Bcl9/Med14/Aspm/Sav1/Spi1/Hes1/Erdr1/Klf10/Phf19/Wdr62/Tal1/Fancd2/Fancc	19
GO:0050921	positive regulation of chemotaxis	17/1197	140/23210	0.00089641	0.00756587	0.00536356	Lgmn/P2ry12/Adam10/Nckap1l/Mapk14/Mdk/Ano6/Tgfb1/Tiam1/Camk1d/Pdgfb/Rac2/Il16/Edn3/Met/Hspb1/Ccr2	17
GO:0030101	natural killer cell activation	14/1197	104/23210	0.000904272	0.00762008	0.00540199	Sp3/Il6ra/Lyst/Ptprc/Ikzf1/Itgb2/Elf4/Rab27a/Ulbp1/Slamf6/Raet1a/Raet1b/Raet1c/Raet1d	14
GO:0071156	regulation of cell cycle arrest	10/1197	60/23210	0.000917412	0.00771852	0.00547177	Ccnd1/Dab2ip/Tgfb1/Foxm1/Cdkn1a/Crlf3/Cast/Chek2/Pidd1/Tfap4	10
GO:0051261	protein depolymerization	15/1197	116/23210	0.000921118	0.00773739	0.00548515	Tpm1/Evl/Asph/Stmn1/Ckap2/Kif18b/Kif2c/Tmod1/Mid1/Sh3bp1/Kif18a/Plekhh2/Ccsap/Kif24/Spta1	15
GO:0006303	double-strand break repair via nonhomologous end joining	9/1197	50/23210	0.000926265	0.00774375	0.00548966	Nsd2/Dek/Smchd1/Lig1/Mre11a/Pola1/Polq/Usp51/Aunip	9
GO:0007129	synapsis	9/1197	50/23210	0.000926265	0.00774375	0.00548966	Ndc1/Mre11a/Fancd2/Ccne2/Ccne1/Syce2/Trip13/Brip1/Tex15	9
GO:0060043	regulation of cardiac muscle cell proliferation	9/1197	50/23210	0.000926265	0.00774375	0.00548966	Tgfbr1/Cxadr/Tgfbr2/Mapk14/Mef2c/Ccnb1/Sav1/Cdk1/Foxp1	9
GO:0001906	cell killing	20/1197	179/23210	0.000963166	0.00803955	0.00569936	Cfh/Ccr5/Ctsh/Lyst/Ptprc/Syk/Vav1/Ptpn6/Hprt/Bcl2l11/Rab27a/Ceacam1/Il7r/Ulbp1/Slamf6/Raet1a/Raet1b/Raet1c/Raet1d/H2-Q10	20
GO:0002292	T cell differentiation involved in immune response	11/1197	71/23210	0.000974168	0.00811858	0.00575538	Nfkbiz/Tgfb1/Stat6/Foxp1/Malt1/Gpr183/Relb/Ripk2/Ccr2/Irf4/Slamf6	11
GO:0001886	endothelial cell morphogenesis	5/1197	16/23210	0.000980145	0.00812998	0.00576347	Col18a1/Heg1/Pecam1/Col23a1/Met	5
GO:0002283	neutrophil activation involved in immune response	5/1197	16/23210	0.000980145	0.00812998	0.00576347	Syk/Itgam/Myo1f/Itgb2/Ptafr	5
GO:0043923	positive regulation by host of viral transcription	5/1197	16/23210	0.000980145	0.00812998	0.00576347	Jun/Nucks1/Sp1/Ctdp1/Tfap4	5
GO:0043473	pigmentation	14/1197	105/23210	0.000994857	0.00823909	0.00584082	Sparc/Atp6ap2/Mef2c/Lyst/Dct/Rab32/Bcl2l11/Enpp1/Rab27a/Edn3/Recql4/Mreg/Cdh3/Tyr	14
GO:0051283	negative regulation of sequestering of calcium ion	15/1197	117/23210	0.00100724	0.00832863	0.00590429	Asph/Lyn/Ccr5/Tgfb1/P2ry6/Ptprc/Itpr1/Ptpn6/Aplnr/Ubash3b/Itpr3/Plcb2/Bbc3/Itgb3/Capn3	15
GO:2000772	regulation of cellular senescence	8/1197	41/23210	0.00101956	0.0084173	0.00596715	Nampt/Plk2/Map3k3/Nuak1/Cdk6/Rbl1/Fbxo5/Cgas	8
GO:0045600	positive regulation of fat cell differentiation	10/1197	61/23210	0.0010474	0.00862975	0.00611776	Zfp36/Mapk14/Lrp5/Zfp385a/Fndc3b/Frzb/Tmem64/Sav1/Dact1/Sfrp2	10
GO:0021700	developmental maturation	30/1197	317/23210	0.00104855	0.00862975	0.00611776	Epas1/Abhd2/Cx3cr1/Picalm/Ptbp3/Dab2ip/Pmp22/Ano6/Ccnb1/Pou2f2/Cdc20/Hes1/Lyl1/Pdgfb/Rflnb/Cdc25b/Brca2/Rab32/Kif14/Tal1/Aurka/Btk/Disc1/Fbxo5/Ret/Trip13/Mreg/Cdh3/Rflna/Tbx6	30
GO:0001974	blood vessel remodeling	9/1197	51/23210	0.00107404	0.00881213	0.00624705	Epas1/Flna/Mef2c/Jag1/Nfatc3/Itga4/Sema3c/Ceacam1/Ccr2	9
GO:0050819	negative regulation of coagulation	9/1197	51/23210	0.00107404	0.00881213	0.00624705	Pdgfra/Sh2b3/Pros1/Cd34/Pdgfb/Ubash3b/Tfpi/Ceacam1/Procr	9
GO:0045446	endothelial cell differentiation	14/1197	106/23210	0.00109295	0.00895157	0.0063459	Tgfbr1/Msn/Rap1b/Rock2/Btg1/Afdn/Col18a1/Heg1/Jag1/Pecam1/Col23a1/Bmp6/Ceacam1/Met	14
GO:0051817	modulation of process of other organism involved in symbiotic interaction	12/1197	83/23210	0.00109442	0.00895157	0.0063459	Csf1r/Jun/Nucks1/Sp1/Smc3/Fmr1/Ccr5/Tgfb1/Ctdp1/Bcl2l11/Ceacam1/Tfap4	12
GO:0009416	response to light stimulus	28/1197	290/23210	0.00111991	0.00914596	0.00648371	Ccnd1/Fmr1/Pcna/Trp53inp1/Usp1/N4bp1/Rnf168/Msh6/Pold1/Cdkn1a/Pbk/Pold3/Pclaf/Casp7/Tipin/Aurkb/Bmf/Polh/Brca2/Dtl/Polk/Primpol/Rad18/Chek1/Synpo/Pmaip1/Ddias/Trpm1	28
GO:0072073	kidney epithelium development	17/1197	143/23210	0.00113749	0.00927518	0.00657532	Pou3f3/Basp1/Sall1/Spry1/Bmp7/Mef2c/Tgfb1/Jag1/Efnb2/Hes1/Npnt/Pdgfb/Timeless/Fmn1/Ret/Rarb/Wnt6	17
GO:0043497	regulation of protein heterodimerization activity	4/1197	10/23210	0.00115051	0.00932388	0.00660984	Dab2ip/Hes1/Cdon/Dut	4
GO:0045144	meiotic sister chromatid segregation	4/1197	10/23210	0.00115051	0.00932388	0.00660984	Bub1b/Bub1/Sgo2a/Rad51c	4
GO:0051177	meiotic sister chromatid cohesion	4/1197	10/23210	0.00115051	0.00932388	0.00660984	Bub1b/Bub1/Sgo2a/Rad51c	4
GO:1902563	regulation of neutrophil activation	4/1197	10/23210	0.00115051	0.00932388	0.00660984	Syk/Itgam/Itgb2/Ptafr	4
GO:0048477	oogenesis	13/1197	95/23210	0.00116667	0.00944039	0.00669244	H3f3b/Hexb/Mdk/Atm/Aspm/Ccnb1/Diaph2/Cdc25b/Brca2/Aurka/Fbxo5/Lgr5/Trip13	13
GO:0050731	positive regulation of peptidyl-tyrosine phosphorylation	21/1197	195/23210	0.00117041	0.0094562	0.00670364	Pdgfra/Csf1r/Grm5/Iqgap1/Lyn/Il6ra/Tgfb1/Pecam1/Ptprc/Syk/Ncapg2/Hes1/Hcls1/Pdgfb/Lrrk1/Bmp6/Tal1/Ripk2/Bank1/Cass4/Itgb3	21
GO:0098727	maintenance of cell number	19/1197	169/23210	0.001184	0.00955141	0.00677114	Zfp36l2/Sall1/Smc1a/Bmp7/Smc3/Lrp5/Bcl9/Med14/Aspm/Sav1/Spi1/Hes1/Erdr1/Klf10/Phf19/Wdr62/Tal1/Fancd2/Fancc	19
GO:0051282	regulation of sequestering of calcium ion	15/1197	119/23210	0.00119999	0.00966569	0.00685215	Asph/Lyn/Ccr5/Tgfb1/P2ry6/Ptprc/Itpr1/Ptpn6/Aplnr/Ubash3b/Itpr3/Plcb2/Bbc3/Itgb3/Capn3	15
GO:0048524	positive regulation of viral process	12/1197	84/23210	0.00121804	0.00978125	0.00693408	Csf1r/Jun/Nucks1/Top2a/Sp1/Smc3/Fmr1/Kpna2/Ctdp1/Mdfic/Ceacam1/Tfap4	12
GO:0060420	regulation of heart growth	12/1197	84/23210	0.00121804	0.00978125	0.00693408	Tgfbr1/Dusp6/Cxadr/Tgfbr2/Mapk14/Mef2c/Rgs2/Ccnb1/Sav1/Cdk1/Ctdp1/Foxp1	12
GO:0051145	smooth muscle cell differentiation	11/1197	73/23210	0.00123273	0.00988425	0.00700709	Dnmt1/Mef2c/Tgfb1/Nfatc3/Nfatc1/Hes1/Npnt/Pdgfb/Itga8/Foxf1/Adm	11
GO:0010543	regulation of platelet activation	7/1197	33/23210	0.00125003	0.00997758	0.00707326	Pdgfra/Lyn/Sh2b3/Syk/Pdgfb/Ubash3b/Ceacam1	7
GO:0033598	mammary gland epithelial cell proliferation	7/1197	33/23210	0.00125003	0.00997758	0.00707326	Ccnd1/Esr1/Rreb1/Stat6/Iqgap3/Brca2/Epha2	7
GO:0071539	protein localization to centrosome	7/1197	33/23210	0.00125003	0.00997758	0.00707326	Cep192/Nup62/Spag5/Cep72/Aurka/Disc1/Stil	7

## Sheet: Table6_Tns3iKO_resCPM_stats
Statistics and expression levels (counts per million) of all genes detected in purified OPCs/iOLs, when comparing Tns3iKO and control cells
Symbol	logFC	logCPM	F	PValue	KO1	KO2	KO3	CT1	CT2	CT3	CT4	CT5
Sept1	0.170023	1.38687	0.68211	0.428598	1.45858	1.45858	1.45858	1.28856	1.28856	1.28856	1.28856	1.28856
March2	-0.0421943	5.03832	0.171851	0.687441	5.00915	5.00915	5.00915	5.05135	5.05135	5.05135	5.05135	5.05135
Sept2	0.0328282	1.75047	0.00927569	0.925224	1.75009	1.75009	1.75009	1.71726	1.71726	1.71726	1.71726	1.71726
Sept3	-0.190077	7.43684	5.61579	0.0398851	7.31464	7.31464	7.31464	7.50471	7.50471	7.50471	7.50471	7.50471
Sept4	0.0163721	6.34798	0.00466341	0.946935	6.35677	6.35677	6.35677	6.3404	6.3404	6.3404	6.3404	6.3404
Sept5	-0.614469	6.29649	9.63015	0.0115139	5.88156	5.88156	5.88156	6.49603	6.49603	6.49603	6.49603	6.49603
Sept6	0.068968	4.74589	0.27317	0.612876	4.78558	4.78558	4.78558	4.71661	4.71661	4.71661	4.71661	4.71661
Sept7	-0.114854	9.07881	0.646917	0.440378	9.00579	9.00579	9.00579	9.12064	9.12064	9.12064	9.12064	9.12064
Sept8	-0.288803	8.81915	11.3121	0.00745324	8.63179	8.63179	8.63179	8.92059	8.92059	8.92059	8.92059	8.92059
Sept9	0.0711131	6.26893	0.42773	0.528221	6.31202	6.31202	6.31202	6.24091	6.24091	6.24091	6.24091	6.24091
Sept10	0.11945	5.0708	1.14923	0.309515	5.14182	5.14182	5.14182	5.02237	5.02237	5.02237	5.02237	5.02237
Sept11	0.13487	6.53147	0.923409	0.359795	6.61338	6.61338	6.61338	6.47851	6.47851	6.47851	6.47851	6.47851
0610009B22Rik	-0.136786	3.80818	0.822185	0.386392	3.71496	3.71496	3.71496	3.85175	3.85175	3.85175	3.85175	3.85175
0610009E02Rik	-0.424699	-0.733133	0.752977	0.406376	-1.17031	-1.17031	-1.17031	-0.745609	-0.745609	-0.745609	-0.745609	-0.745609
0610009L18Rik	-0.136784	1.51097	0.40192	0.54068	1.39398	1.39398	1.39398	1.53077	1.53077	1.53077	1.53077	1.53077
0610010F05Rik	-0.00236628	5.00091	0.000615502	0.980707	4.99674	4.99674	4.99674	4.99911	4.99911	4.99911	4.99911	4.99911
0610010K14Rik	-0.390408	0.474295	1.82943	0.206714	0.160285	0.160285	0.160285	0.550693	0.550693	0.550693	0.550693	0.550693
0610012G03Rik	-0.147691	4.69248	1.36009	0.271243	4.59518	4.59518	4.59518	4.74287	4.74287	4.74287	4.74287	4.74287
0610030E20Rik	0.0048591	5.316	0.00429936	0.949045	5.3169	5.3169	5.3169	5.31204	5.31204	5.31204	5.31204	5.31204
0610040B10Rik	-0.301814	0.99404	1.34429	0.273872	0.754528	0.754528	0.754528	1.05634	1.05634	1.05634	1.05634	1.05634
0610040J01Rik	-0.111573	5.93864	2.54267	0.142657	5.86655	5.86655	5.86655	5.97812	5.97812	5.97812	5.97812	5.97812
1110002E22Rik	0.395673	-1.67562	0.352765	0.56607	-1.71289	-1.71289	-1.71289	-2.10857	-2.10857	-2.10857	-2.10857	-2.10857
1110002L01Rik	-0.11608	3.81507	0.814308	0.388588	3.73546	3.73546	3.73546	3.85154	3.85154	3.85154	3.85154	3.85154
1110004F10Rik	-0.112867	6.51286	1.58573	0.237234	6.4403	6.4403	6.4403	6.55317	6.55317	6.55317	6.55317	6.55317
1110006O24Rik	0.0868607	0.561686	0.0783619	0.785376	0.560378	0.560378	0.560378	0.473518	0.473518	0.473518	0.473518	0.473518
1110008P14Rik	-0.251971	3.24954	2.77172	0.127682	3.07755	3.07755	3.07755	3.32952	3.32952	3.32952	3.32952	3.32952
1110012L19Rik	-0.134165	3.51268	0.534619	0.481865	3.41965	3.41965	3.41965	3.55382	3.55382	3.55382	3.55382	3.55382
1110015O18Rik	0.0678156	4.13428	0.348803	0.568221	4.17163	4.17163	4.17163	4.10382	4.10382	4.10382	4.10382	4.10382
1110017D15Rik	-0.552408	-0.0343872	2.51236	0.144805	-0.493931	-0.493931	-0.493931	0.0584767	0.0584767	0.0584767	0.0584767	0.0584767
1110019D14Rik	-0.00401077	0.805256	0.000195011	0.98914	0.758854	0.758854	0.758854	0.762865	0.762865	0.762865	0.762865	0.762865
1110020A21Rik	0.00465823	0.240849	0.000246169	0.987798	0.179795	0.179795	0.179795	0.175137	0.175137	0.175137	0.175137	0.175137
1110032A03Rik	-0.157212	4.04152	2.28368	0.162437	3.93604	3.93604	3.93604	4.09326	4.09326	4.09326	4.09326	4.09326
1110032F04Rik	-0.089274	2.38588	0.349282	0.56796	2.31269	2.31269	2.31269	2.40196	2.40196	2.40196	2.40196	2.40196
1110038B12Rik	-0.0552007	4.14039	0.23884	0.635846	4.10089	4.10089	4.10089	4.15609	4.15609	4.15609	4.15609	4.15609
1110038F14Rik	-0.161647	4.56062	1.64183	0.229695	4.4539	4.4539	4.4539	4.61555	4.61555	4.61555	4.61555	4.61555
1110046J04Rik	-0.682459	-0.418416	3.33402	0.0985766	-1.00516	-1.00516	-1.00516	-0.322703	-0.322703	-0.322703	-0.322703	-0.322703
1110051M20Rik	-0.16986	5.07527	4.72376	0.055515	4.96418	4.96418	4.96418	5.13404	5.13404	5.13404	5.13404	5.13404
1110059E24Rik	0.102105	4.43562	0.631656	0.445654	4.49489	4.49489	4.49489	4.39278	4.39278	4.39278	4.39278	4.39278
1110059G10Rik	0.00283346	4.0249	0.000575545	0.981344	4.02157	4.02157	4.02157	4.01874	4.01874	4.01874	4.01874	4.01874
1110065P20Rik	-0.282765	4.59274	4.77409	0.0544508	4.40597	4.40597	4.40597	4.68874	4.68874	4.68874	4.68874	4.68874
1190005I06Rik	-0.178425	-0.8061	0.129855	0.726263	-1.07184	-1.07184	-1.07184	-0.893413	-0.893413	-0.893413	-0.893413	-0.893413
1190007I07Rik	0.0425109	2.52796	0.0826675	0.77973	2.53957	2.53957	2.53957	2.49706	2.49706	2.49706	2.49706	2.49706
1300002E11Rik	0.102564	3.06987	0.290069	0.602249	3.12362	3.12362	3.12362	3.02105	3.02105	3.02105	3.02105	3.02105
1500004A13Rik	-0.103856	4.93439	0.547734	0.476679	4.86567	4.86567	4.86567	4.96952	4.96952	4.96952	4.96952	4.96952
1500009C09Rik	-0.349798	5.09251	7.61547	0.0205862	4.86158	4.86158	4.86158	5.21138	5.21138	5.21138	5.21138	5.21138
1500009L16Rik	0.456968	2.68675	3.15481	0.106842	2.943	2.943	2.943	2.48603	2.48603	2.48603	2.48603	2.48603
1500011B03Rik	-0.256791	5.50014	9.66093	0.0114183	5.33241	5.33241	5.33241	5.5892	5.5892	5.5892	5.5892	5.5892
1500015A07Rik	-0.152514	0.857176	0.375194	0.554196	0.712474	0.712474	0.712474	0.864988	0.864988	0.864988	0.864988	0.864988
1500015L24Rik	-1.15082	-1.13975	7.70013	0.0200586	-2.16803	-2.16803	-2.16803	-1.01721	-1.01721	-1.01721	-1.01721	-1.01721
1500026H17Rik	-0.205599	0.680258	0.740314	0.410209	0.490448	0.490448	0.490448	0.696046	0.696046	0.696046	0.696046	0.696046
1600002K03Rik	-0.00705215	1.83515	0.00128526	0.972125	1.80679	1.80679	1.80679	1.81384	1.81384	1.81384	1.81384	1.81384
1600010M07Rik	-0.455932	-1.29501	0.439115	0.522898	-1.84828	-1.84828	-1.84828	-1.39235	-1.39235	-1.39235	-1.39235	-1.39235
1600012H06Rik	-0.0287765	5.252	0.070119	0.796675	5.23164	5.23164	5.23164	5.26042	5.26042	5.26042	5.26042	5.26042
1600014C10Rik	0.14124	4.10355	1.57494	0.238723	4.18555	4.18555	4.18555	4.04431	4.04431	4.04431	4.04431	4.04431
1600020E01Rik	-0.197193	3.65196	1.11304	0.31685	3.51872	3.51872	3.51872	3.71591	3.71591	3.71591	3.71591	3.71591
1600029I14Rik	0.150086	-1.37793	0.0438587	0.838425	-1.50942	-1.50942	-1.50942	-1.6595	-1.6595	-1.6595	-1.6595	-1.6595
1700001G11Rik	0.881242	-1.54579	2.53722	0.143041	-1.30547	-1.30547	-1.30547	-2.18671	-2.18671	-2.18671	-2.18671	-2.18671
1700001G17Rik	-0.613825	-1.18175	0.885712	0.369363	-1.81647	-1.81647	-1.81647	-1.20264	-1.20264	-1.20264	-1.20264	-1.20264
1700001L19Rik	-0.00605379	-1.34803	0.000107996	0.991918	-1.58974	-1.58974	-1.58974	-1.58369	-1.58369	-1.58369	-1.58369	-1.58369
1700001O22Rik	-0.110799	1.88679	0.115654	0.741005	1.79219	1.79219	1.79219	1.90299	1.90299	1.90299	1.90299	1.90299
1700001P01Rik	0.339068	-1.59361	0.314619	0.587511	-1.65431	-1.65431	-1.65431	-1.99337	-1.99337	-1.99337	-1.99337	-1.99337
1700003E16Rik	-0.026208	0.103871	0.00299877	0.957434	0.00205653	0.00205653	0.00205653	0.0282645	0.0282645	0.0282645	0.0282645	0.0282645
1700003F12Rik	-0.205463	-0.389836	0.161519	0.696426	-0.655138	-0.655138	-0.655138	-0.449674	-0.449674	-0.449674	-0.449674	-0.449674
1700007K13Rik	0.57091	0.222218	2.08833	0.179774	0.478412	0.478412	0.478412	-0.0924981	-0.0924981	-0.0924981	-0.0924981	-0.0924981
1700007L15Rik	-0.231258	-0.944584	0.267273	0.616685	-1.27993	-1.27993	-1.27993	-1.04867	-1.04867	-1.04867	-1.04867	-1.04867
1700008J07Rik	0.00207631	1.72243	6.11286e-05	0.993919	1.69457	1.69457	1.69457	1.69249	1.69249	1.69249	1.69249	1.69249
1700008O03Rik	-0.479486	-0.640273	1.28259	0.284487	-1.09412	-1.09412	-1.09412	-0.614635	-0.614635	-0.614635	-0.614635	-0.614635
1700010I14Rik	0.0602321	0.638685	0.0564334	0.817139	0.620006	0.620006	0.620006	0.559774	0.559774	0.559774	0.559774	0.559774
1700012D01Rik	0.543442	4.07262	17.9201	0.00183367	4.38341	4.38341	4.38341	3.83996	3.83996	3.83996	3.83996	3.83996
1700012D14Rik	-0.0639734	1.22622	0.068012	0.799676	1.14912	1.14912	1.14912	1.21309	1.21309	1.21309	1.21309	1.21309
1700017B05Rik	0.385619	5.38595	4.49836	0.0606095	5.61326	5.61326	5.61326	5.22764	5.22764	5.22764	5.22764	5.22764
1700018A04Rik	-0.0935676	-0.36974	0.0780393	0.785806	-0.540438	-0.540438	-0.540438	-0.446871	-0.446871	-0.446871	-0.446871	-0.446871
1700019A02Rik	-0.103976	-1.57194	0.0146804	0.906022	-1.89175	-1.89175	-1.89175	-1.78777	-1.78777	-1.78777	-1.78777	-1.78777
1700019D03Rik	-0.222814	3.85358	3.86064	0.0785311	3.70431	3.70431	3.70431	3.92713	3.92713	3.92713	3.92713	3.92713
1700020D05Rik	0.0872497	0.950397	0.0700406	0.796785	0.963554	0.963554	0.963554	0.876304	0.876304	0.876304	0.876304	0.876304
1700021F05Rik	-0.077083	3.4791	0.27912	0.609087	3.42282	3.42282	3.42282	3.49991	3.49991	3.49991	3.49991	3.49991
1700022N22Rik	-0.292495	-1.61339	0.299206	0.596671	-2.07744	-2.07744	-2.07744	-1.78495	-1.78495	-1.78495	-1.78495	-1.78495
1700024F13Rik	0.420806	1.89058	4.30992	0.0653202	2.11737	2.11737	2.11737	1.69657	1.69657	1.69657	1.69657	1.69657
1700025G04Rik	-0.0670184	7.37769	0.488329	0.500994	7.33493	7.33493	7.33493	7.40195	7.40195	7.40195	7.40195	7.40195
1700028E10Rik	0.486051	0.943727	3.33571	0.0985025	1.1883	1.1883	1.1883	0.702247	0.702247	0.702247	0.702247	0.702247
1700028J19Rik	-0.113295	0.85126	0.172437	0.686941	0.727581	0.727581	0.727581	0.840877	0.840877	0.840877	0.840877	0.840877
1700028P14Rik	-1.28531	-1.64958	4.01292	0.0737087	-2.89513	-2.89513	-2.89513	-1.60982	-1.60982	-1.60982	-1.60982	-1.60982
1700029I15Rik	0.125047	0.353755	0.238962	0.63576	0.367277	0.367277	0.367277	0.242229	0.242229	0.242229	0.242229	0.242229
1700029J07Rik	-0.145882	1.62027	0.315751	0.58685	1.502	1.502	1.502	1.64788	1.64788	1.64788	1.64788	1.64788
1700030J22Rik	-0.071313	1.73058	0.132619	0.723502	1.66229	1.66229	1.66229	1.7336	1.7336	1.7336	1.7336	1.7336
1700030K09Rik	-0.183277	3.90093	2.63859	0.136125	3.77794	3.77794	3.77794	3.96122	3.96122	3.96122	3.96122	3.96122
1700034H15Rik	-0.36492	0.499936	1.93786	0.194821	0.201772	0.201772	0.201772	0.566692	0.566692	0.566692	0.566692	0.566692
1700037C18Rik	-0.168318	1.21767	0.484691	0.502555	1.07037	1.07037	1.07037	1.23869	1.23869	1.23869	1.23869	1.23869
1700037H04Rik	-0.0198238	4.1705	0.0344556	0.856544	4.15346	4.15346	4.15346	4.17328	4.17328	4.17328	4.17328	4.17328
1700040D17Rik	-0.513017	0.0594616	2.47265	0.147683	-0.369889	-0.369889	-0.369889	0.143128	0.143128	0.143128	0.143128	0.143128
1700047M11Rik	-0.657245	5.05561	1.74687	0.216427	4.60831	4.60831	4.60831	5.26556	5.26556	5.26556	5.26556	5.26556
1700048O20Rik	-0.254135	2.474	0.76937	0.401498	2.29314	2.29314	2.29314	2.54727	2.54727	2.54727	2.54727	2.54727
1700055D18Rik	-0.376327	-0.589826	0.804258	0.391418	-0.966488	-0.966488	-0.966488	-0.590161	-0.590161	-0.590161	-0.590161	-0.590161
1700056E22Rik	0.196507	-0.276934	0.275853	0.611161	-0.260373	-0.260373	-0.260373	-0.45688	-0.45688	-0.45688	-0.45688	-0.45688
1700063D05Rik	-0.644226	-1.17932	0.74531	0.40869	-1.80251	-1.80251	-1.80251	-1.15828	-1.15828	-1.15828	-1.15828	-1.15828
1700065D16Rik	-0.264135	-1.34622	0.40774	0.537821	-1.75437	-1.75437	-1.75437	-1.49023	-1.49023	-1.49023	-1.49023	-1.49023
1700066M21Rik	-0.0545598	5.88674	0.197281	0.666615	5.85073	5.85073	5.85073	5.90529	5.90529	5.90529	5.90529	5.90529
1700086L19Rik	0.026393	4.74433	0.0693975	0.797697	4.75774	4.75774	4.75774	4.73135	4.73135	4.73135	4.73135	4.73135
1700086O06Rik	0.319112	1.5672	0.8622	0.375529	1.72834	1.72834	1.72834	1.40923	1.40923	1.40923	1.40923	1.40923
1700088E04Rik	-0.0273126	2.28018	0.0230964	0.882304	2.24529	2.24529	2.24529	2.27261	2.27261	2.27261	2.27261	2.27261
1700094D03Rik	-0.102821	3.63074	0.457026	0.514724	3.55888	3.55888	3.55888	3.6617	3.6617	3.6617	3.6617	3.6617
1700095J03Rik	0.558479	0.962731	3.83237	0.0794695	1.2432	1.2432	1.2432	0.684719	0.684719	0.684719	0.684719	0.684719
1700096K18Rik	-0.134773	2.96415	1.04139	0.332141	2.86762	2.86762	2.86762	3.0024	3.0024	3.0024	3.0024	3.0024
1700101I11Rik	-0.106477	-1.74911	0.0188673	0.893541	-2.13823	-2.13823	-2.13823	-2.03176	-2.03176	-2.03176	-2.03176	-2.03176
1700102H20Rik	0.118811	-0.504327	0.0629941	0.807032	-0.549628	-0.549628	-0.549628	-0.668438	-0.668438	-0.668438	-0.668438	-0.668438
1700102P08Rik	-0.439212	0.0925516	1.68036	0.224704	-0.289799	-0.289799	-0.289799	0.149413	0.149413	0.149413	0.149413	0.149413
1700109H08Rik	-0.18104	2.42446	0.258105	0.622715	2.29394	2.29394	2.29394	2.47498	2.47498	2.47498	2.47498	2.47498
1700110C19Rik	-0.401409	0.760458	1.47781	0.252718	0.446081	0.446081	0.446081	0.84749	0.84749	0.84749	0.84749	0.84749
1700112J16Rik	-0.426508	-1.44312	0.288602	0.603155	-1.99489	-1.99489	-1.99489	-1.56838	-1.56838	-1.56838	-1.56838	-1.56838
1700113A16Rik	-0.0482007	0.949422	0.0265709	0.873841	0.875477	0.875477	0.875477	0.923678	0.923678	0.923678	0.923678	0.923678
1700120C14Rik	-0.372722	-0.636667	0.731336	0.412962	-1.02715	-1.02715	-1.02715	-0.654426	-0.654426	-0.654426	-0.654426	-0.654426
1700123O20Rik	-0.180731	4.75776	1.90213	0.198637	4.639	4.639	4.639	4.81973	4.81973	4.81973	4.81973	4.81973
1700124L16Rik	-1.03621	-0.405237	10.4911	0.00916944	-1.25758	-1.25758	-1.25758	-0.221368	-0.221368	-0.221368	-0.221368	-0.221368
1810010H24Rik	0.176307	3.99263	1.179	0.303663	4.09523	4.09523	4.09523	3.91893	3.91893	3.91893	3.91893	3.91893
1810013A23Rik	0.0221272	6.10168	0.0523659	0.823722	6.11427	6.11427	6.11427	6.09214	6.09214	6.09214	6.09214	6.09214
1810013L24Rik	-0.022459	6.15316	0.0956408	0.763629	6.13785	6.13785	6.13785	6.16031	6.16031	6.16031	6.16031	6.16031
1810014B01Rik	0.0387037	2.92304	0.0591797	0.812836	2.9362	2.9362	2.9362	2.8975	2.8975	2.8975	2.8975	2.8975
1810021B22Rik	-0.238635	0.809522	0.722614	0.415664	0.602486	0.602486	0.602486	0.841121	0.841121	0.841121	0.841121	0.841121
1810024B03Rik	-0.168194	0.997401	0.457182	0.514654	0.845578	0.845578	0.845578	1.01377	1.01377	1.01377	1.01377	1.01377
1810026B05Rik	0.0262941	5.09098	0.0555517	0.818545	5.1049	5.1049	5.1049	5.0786	5.0786	5.0786	5.0786	5.0786
1810030O07Rik	0.0380102	5.14625	0.216681	0.651799	5.16755	5.16755	5.16755	5.12954	5.12954	5.12954	5.12954	5.12954
1810034E14Rik	-0.128709	-1.58227	0.0273926	0.871925	-1.95728	-1.95728	-1.95728	-1.82857	-1.82857	-1.82857	-1.82857	-1.82857
1810037I17Rik	-0.307222	6.09023	5.40593	0.0430143	5.88957	5.88957	5.88957	6.19679	6.19679	6.19679	6.19679	6.19679
1810044D09Rik	-0.614804	0.175617	3.59533	0.0879156	-0.321866	-0.321866	-0.321866	0.292938	0.292938	0.292938	0.292938	0.292938
1810055G02Rik	-0.0898981	5.13025	1.47061	0.253801	5.07101	5.07101	5.07101	5.16091	5.16091	5.16091	5.16091	5.16091
1810058I24Rik	-0.310341	5.21703	7.1475	0.023828	5.01295	5.01295	5.01295	5.32329	5.32329	5.32329	5.32329	5.32329
1810062O18Rik	-0.424836	-0.0065542	0.931061	0.357899	-0.385382	-0.385382	-0.385382	0.0394536	0.0394536	0.0394536	0.0394536	0.0394536
2010001A14Rik	-0.385767	1.81784	2.92587	0.118723	1.53978	1.53978	1.53978	1.92555	1.92555	1.92555	1.92555	1.92555
2010300C02Rik	0.144752	3.85928	1.27131	0.28649	3.94249	3.94249	3.94249	3.79774	3.79774	3.79774	3.79774	3.79774
2010315B03Rik	-0.0309271	4.03759	0.0779336	0.785946	4.01309	4.01309	4.01309	4.04401	4.04401	4.04401	4.04401	4.04401
2210016F16Rik	0.0675445	3.80485	0.179871	0.680684	3.84073	3.84073	3.84073	3.77318	3.77318	3.77318	3.77318	3.77318
2210016L21Rik	-0.116873	5.48735	2.04985	0.183472	5.41126	5.41126	5.41126	5.52814	5.52814	5.52814	5.52814	5.52814
2210406O10Rik	-0.345444	-0.243914	0.99845	0.341827	-0.572512	-0.572512	-0.572512	-0.227068	-0.227068	-0.227068	-0.227068	-0.227068
2210408F21Rik	-0.55041	-0.78516	1.01303	0.338492	-1.30471	-1.30471	-1.30471	-0.754296	-0.754296	-0.754296	-0.754296	-0.754296
2210408I21Rik	0.0134294	3.50308	0.00965754	0.923706	3.50438	3.50438	3.50438	3.49095	3.49095	3.49095	3.49095	3.49095
2210416O15Rik	-0.127617	6.9805	1.60643	0.234414	6.89878	6.89878	6.89878	7.0264	7.0264	7.0264	7.0264	7.0264
2300009A05Rik	-0.370206	3.55606	9.97984	0.0104828	3.30622	3.30622	3.30622	3.67643	3.67643	3.67643	3.67643	3.67643
2310001H17Rik	0.170624	0.867635	0.213843	0.653915	0.919284	0.919284	0.919284	0.74866	0.74866	0.74866	0.74866	0.74866
2310009A05Rik	-0.120528	2.30786	0.533512	0.482307	2.21391	2.21391	2.21391	2.33444	2.33444	2.33444	2.33444	2.33444
2310009B15Rik	-0.318983	2.68337	3.58421	0.0883389	2.46249	2.46249	2.46249	2.78147	2.78147	2.78147	2.78147	2.78147
2310010J17Rik	0.124665	1.18531	0.34396	0.570874	1.22527	1.22527	1.22527	1.10061	1.10061	1.10061	1.10061	1.10061
2310011J03Rik	-0.187649	4.62151	2.6862	0.133026	4.49787	4.49787	4.49787	4.68552	4.68552	4.68552	4.68552	4.68552
2310022A10Rik	0.0203005	4.57879	0.047305	0.832303	4.58799	4.58799	4.58799	4.56769	4.56769	4.56769	4.56769	4.56769
2310022B05Rik	-0.0895961	7.48735	1.32835	0.27656	7.43024	7.43024	7.43024	7.51983	7.51983	7.51983	7.51983	7.51983
2310030G06Rik	0.0645195	-1.18879	0.0087266	0.927464	-1.36011	-1.36011	-1.36011	-1.42463	-1.42463	-1.42463	-1.42463	-1.42463
2310033P09Rik	0.144872	3.56568	1.11181	0.317105	3.64767	3.64767	3.64767	3.5028	3.5028	3.5028	3.5028	3.5028
2310039H08Rik	-0.49802	2.70087	3.77934	0.0812675	2.35392	2.35392	2.35392	2.85194	2.85194	2.85194	2.85194	2.85194
2310040G24Rik	0.667515	-0.392145	3.26558	0.101634	-0.120989	-0.120989	-0.120989	-0.788504	-0.788504	-0.788504	-0.788504	-0.788504
2310057M21Rik	-0.187971	3.67533	1.45107	0.256769	3.54843	3.54843	3.54843	3.73641	3.73641	3.73641	3.73641	3.73641
2310061I04Rik	-0.0991557	4.59202	1.02149	0.336578	4.52573	4.52573	4.52573	4.62488	4.62488	4.62488	4.62488	4.62488
2310068J16Rik	-0.554712	-1.46527	0.999318	0.341627	-2.10228	-2.10228	-2.10228	-1.54757	-1.54757	-1.54757	-1.54757	-1.54757
2310069G16Rik	-0.0745432	2.14029	0.159369	0.698338	2.07357	2.07357	2.07357	2.14812	2.14812	2.14812	2.14812	2.14812
2410002F23Rik	-0.0900747	6.34537	0.766061	0.402475	6.28726	6.28726	6.28726	6.37734	6.37734	6.37734	6.37734	6.37734
2410004B18Rik	-0.117089	4.68079	2.36936	0.155521	4.60313	4.60313	4.60313	4.72022	4.72022	4.72022	4.72022	4.72022
2410004I01Rik	0.429135	-1.65244	0.729158	0.413634	-1.68269	-1.68269	-1.68269	-2.11183	-2.11183	-2.11183	-2.11183	-2.11183
2410004P03Rik	-0.259829	1.12029	0.226241	0.644797	0.905593	0.905593	0.905593	1.16542	1.16542	1.16542	1.16542	1.16542
2410006H16Rik	-0.222498	4.2898	1.30824	0.280005	4.14231	4.14231	4.14231	4.36481	4.36481	4.36481	4.36481	4.36481
2410018L13Rik	0.169121	-0.762255	0.0445659	0.837149	-0.796895	-0.796895	-0.796895	-0.966016	-0.966016	-0.966016	-0.966016	-0.966016
2410022M11Rik	-0.151666	1.54076	0.24619	0.630759	1.41236	1.41236	1.41236	1.56402	1.56402	1.56402	1.56402	1.56402
2410131K14Rik	-0.172305	4.69994	3.87233	0.0781475	4.58653	4.58653	4.58653	4.75883	4.75883	4.75883	4.75883	4.75883
2500002B13Rik	0.0747243	0.831894	0.0900092	0.770461	0.82979	0.82979	0.82979	0.755065	0.755065	0.755065	0.755065	0.755065
2500004C02Rik	-0.0888578	3.15998	0.428311	0.527947	3.0944	3.0944	3.0944	3.18325	3.18325	3.18325	3.18325	3.18325
2510002D24Rik	-0.237201	2.75699	2.06298	0.1822	2.59052	2.59052	2.59052	2.82772	2.82772	2.82772	2.82772	2.82772
2510003B16Rik	-0.17532	6.40314	4.72973	0.0553874	6.28998	6.28998	6.28998	6.4653	6.4653	6.4653	6.4653	6.4653
2510009E07Rik	0.0153729	7.57344	0.0359684	0.853469	7.58258	7.58258	7.58258	7.56721	7.56721	7.56721	7.56721	7.56721
2510039O18Rik	-0.0300793	5.91979	0.123163	0.73309	5.8996	5.8996	5.8996	5.92968	5.92968	5.92968	5.92968	5.92968
2610001J05Rik	-0.0859814	5.11129	0.733434	0.412316	5.05458	5.05458	5.05458	5.14056	5.14056	5.14056	5.14056	5.14056
2610002M06Rik	0.0308885	5.0935	0.074285	0.790879	5.11026	5.11026	5.11026	5.07937	5.07937	5.07937	5.07937	5.07937
2610005L07Rik	-0.0240265	3.9631	0.0199347	0.890593	3.94274	3.94274	3.94274	3.96677	3.96677	3.96677	3.96677	3.96677
2610008E11Rik	-0.087987	5.93202	0.693486	0.4249	5.87485	5.87485	5.87485	5.96283	5.96283	5.96283	5.96283	5.96283
2610035D17Rik	-0.269289	5.02176	4.91441	0.0516142	4.8448	4.8448	4.8448	5.11409	5.11409	5.11409	5.11409	5.11409
2610035F20Rik	0.111612	-0.703714	0.0949656	0.764437	-0.77405	-0.77405	-0.77405	-0.885663	-0.885663	-0.885663	-0.885663	-0.885663
2610042L04Rik	0.00686459	-0.621863	0.0002366	0.988038	-0.754662	-0.754662	-0.754662	-0.761527	-0.761527	-0.761527	-0.761527	-0.761527
2610044O15Rik8	-0.174712	4.37197	1.79177	0.21107	4.25613	4.25613	4.25613	4.43084	4.43084	4.43084	4.43084	4.43084
2610203C22Rik	0.449086	1.81003	3.02963	0.113141	2.05183	2.05183	2.05183	1.60274	1.60274	1.60274	1.60274	1.60274
2610206C17Rik	0.0653404	-1.52386	0.0201443	0.890023	-1.74985	-1.74985	-1.74985	-1.81519	-1.81519	-1.81519	-1.81519	-1.81519
2610301B20Rik	-0.181516	5.01169	1.41194	0.262859	4.89272	4.89272	4.89272	5.07424	5.07424	5.07424	5.07424	5.07424
2610306M01Rik	-0.24927	2.62555	1.91669	0.19707	2.44981	2.44981	2.44981	2.69908	2.69908	2.69908	2.69908	2.69908
2610316D01Rik	-0.0995395	3.21843	0.414356	0.534607	3.14642	3.14642	3.14642	3.24596	3.24596	3.24596	3.24596	3.24596
2610318N02Rik	0.862179	0.0353616	8.02477	0.0181826	0.435447	0.435447	0.435447	-0.426732	-0.426732	-0.426732	-0.426732	-0.426732
2610507B11Rik	0.0346165	8.68094	0.252473	0.626487	8.70228	8.70228	8.70228	8.66767	8.66767	8.66767	8.66767	8.66767
2610524H06Rik	-0.256791	5.50014	9.66093	0.0114183	5.33241	5.33241	5.33241	5.5892	5.5892	5.5892	5.5892	5.5892
2610528A11Rik	0.939768	-0.303326	3.27929	0.101012	0.112367	0.112367	0.112367	-0.8274	-0.8274	-0.8274	-0.8274	-0.8274
2700038G22Rik	-0.294311	1.07466	0.576197	0.465753	0.849973	0.849973	0.849973	1.14428	1.14428	1.14428	1.14428	1.14428
2700046A07Rik	0.199693	1.96646	0.876207	0.371837	2.0675	2.0675	2.0675	1.86781	1.86781	1.86781	1.86781	1.86781
2700046G09Rik	-0.207628	1.41204	1.00053	0.341349	1.24747	1.24747	1.24747	1.4551	1.4551	1.4551	1.4551	1.4551
2700049A03Rik	0.122765	4.04536	1.47227	0.25355	4.11598	4.11598	4.11598	3.99322	3.99322	3.99322	3.99322	3.99322
2700054A10Rik	-0.0731112	-0.451096	0.0253522	0.876741	-0.610289	-0.610289	-0.610289	-0.537178	-0.537178	-0.537178	-0.537178	-0.537178
2700062C07Rik	-0.11021	3.24105	0.825133	0.385576	3.16232	3.16232	3.16232	3.27253	3.27253	3.27253	3.27253	3.27253
2700081O15Rik	-0.0915742	6.62175	1.36875	0.269817	6.56306	6.56306	6.56306	6.65464	6.65464	6.65464	6.65464	6.65464
2700097O09Rik	-0.0977491	3.80181	0.124516	0.731693	3.73399	3.73399	3.73399	3.83174	3.83174	3.83174	3.83174	3.83174
2700099C18Rik	0.817173	2.77062	27.8968	0.000387455	3.215	3.215	3.215	2.39783	2.39783	2.39783	2.39783	2.39783
2810001G20Rik	-0.236072	3.49346	2.20102	0.169494	3.33348	3.33348	3.33348	3.56955	3.56955	3.56955	3.56955	3.56955
2810004N23Rik	-0.105684	5.44863	2.5004	0.145664	5.37974	5.37974	5.37974	5.48543	5.48543	5.48543	5.48543	5.48543
2810006K23Rik	0.195667	3.92691	3.82421	0.079743	4.04087	4.04087	4.04087	3.8452	3.8452	3.8452	3.8452	3.8452
2810013P06Rik	-0.171705	4.58156	2.34905	0.157125	4.46826	4.46826	4.46826	4.63996	4.63996	4.63996	4.63996	4.63996
2810021J22Rik	-0.145543	3.66881	1.92247	0.196453	3.56943	3.56943	3.56943	3.71497	3.71497	3.71497	3.71497	3.71497
2810025M15Rik	0.208543	4.31345	2.29542	0.161466	4.43632	4.43632	4.43632	4.22778	4.22778	4.22778	4.22778	4.22778
2810029C07Rik	-0.401886	2.86367	6.29251	0.0315318	2.58742	2.58742	2.58742	2.98931	2.98931	2.98931	2.98931	2.98931
2810032G03Rik	-0.307204	0.172321	0.873151	0.372638	-0.104619	-0.104619	-0.104619	0.202585	0.202585	0.202585	0.202585	0.202585
2810049E08Rik	-0.280011	0.577496	0.902444	0.365069	0.337746	0.337746	0.337746	0.617757	0.617757	0.617757	0.617757	0.617757
2810403D21Rik	0.123084	1.44137	0.441517	0.521788	1.48752	1.48752	1.48752	1.36444	1.36444	1.36444	1.36444	1.36444
2810408A11Rik	0.0728272	1.43686	0.0943718	0.765149	1.44937	1.44937	1.44937	1.37655	1.37655	1.37655	1.37655	1.37655
2810408I11Rik	1.03088	-0.394222	3.68147	0.0847218	0.072147	0.072147	0.072147	-0.958737	-0.958737	-0.958737	-0.958737	-0.958737
2810414N06Rik	0.0646985	0.615795	0.0644224	0.804907	0.604636	0.604636	0.604636	0.539938	0.539938	0.539938	0.539938	0.539938
2810429I04Rik	0.420806	1.89058	4.30992	0.0653202	2.11737	2.11737	2.11737	1.69657	1.69657	1.69657	1.69657	1.69657
2810454H06Rik	-0.143434	0.128836	0.139181	0.717076	-0.0405604	-0.0405604	-0.0405604	0.102873	0.102873	0.102873	0.102873	0.102873
2810459M11Rik	-0.0327212	5.9505	0.0696929	0.797278	5.92877	5.92877	5.92877	5.96149	5.96149	5.96149	5.96149	5.96149
2900005J15Rik	0.0480912	0.977292	0.0234944	0.881303	0.960248	0.960248	0.960248	0.912156	0.912156	0.912156	0.912156	0.912156
2900026A02Rik	0.346038	4.54702	2.58333	0.13984	4.75027	4.75027	4.75027	4.40423	4.40423	4.40423	4.40423	4.40423
2900040C04Rik	0.200968	-0.643815	0.0858546	0.775653	-0.655054	-0.655054	-0.655054	-0.856022	-0.856022	-0.856022	-0.856022	-0.856022
2900052N01Rik	-0.701694	3.76618	2.52913	0.143611	3.28359	3.28359	3.28359	3.98528	3.98528	3.98528	3.98528	3.98528
2900076A07Rik	-0.242676	3.61743	1.76871	0.213799	3.454	3.454	3.454	3.69667	3.69667	3.69667	3.69667	3.69667
2900079G21Rik	-0.504056	1.81283	3.77665	0.0813602	1.44934	1.44934	1.44934	1.95339	1.95339	1.95339	1.95339	1.95339
2900093K20Rik	-0.435918	0.707481	1.83152	0.206476	0.363359	0.363359	0.363359	0.799277	0.799277	0.799277	0.799277	0.799277
2900097C17Rik	-0.0716119	6.88118	1.04761	0.330769	6.83527	6.83527	6.83527	6.90689	6.90689	6.90689	6.90689	6.90689
3010001F23Rik	-0.0540428	0.863499	0.0277229	0.871162	0.787601	0.787601	0.787601	0.841644	0.841644	0.841644	0.841644	0.841644
3010003L21Rik	0.645122	-0.698743	3.06125	0.111507	-0.469934	-0.469934	-0.469934	-1.11506	-1.11506	-1.11506	-1.11506	-1.11506
3110009E18Rik	-0.599245	1.84868	3.47754	0.0925319	1.42554	1.42554	1.42554	2.02479	2.02479	2.02479	2.02479	2.02479
3110039M20Rik	-0.219176	0.0783295	0.275834	0.611173	-0.141566	-0.141566	-0.141566	0.0776094	0.0776094	0.0776094	0.0776094	0.0776094
3110040N11Rik	-0.180974	2.30923	1.15791	0.307792	2.17542	2.17542	2.17542	2.35639	2.35639	2.35639	2.35639	2.35639
3110045C21Rik	-0.0664135	-1.02564	0.0297569	0.866569	-1.25772	-1.25772	-1.25772	-1.19131	-1.19131	-1.19131	-1.19131	-1.19131
3110056K07Rik	-0.194386	2.54264	1.52396	0.245932	2.40301	2.40301	2.40301	2.5974	2.5974	2.5974	2.5974	2.5974
3110070M22Rik	0.071796	0.773993	0.0596789	0.812066	0.767875	0.767875	0.767875	0.696079	0.696079	0.696079	0.696079	0.696079
3110082I17Rik	0.299835	3.01662	4.17231	0.0690504	3.18672	3.18672	3.18672	2.88689	2.88689	2.88689	2.88689	2.88689
3110082J24Rik	-0.0411183	1.78566	0.041594	0.842587	1.73394	1.73394	1.73394	1.77506	1.77506	1.77506	1.77506	1.77506
3110099E03Rik	-0.150214	-0.0512685	0.240645	0.634587	-0.232961	-0.232961	-0.232961	-0.0827472	-0.0827472	-0.0827472	-0.0827472	-0.0827472
3300002I08Rik	-0.127772	1.74847	0.364346	0.559876	1.64322	1.64322	1.64322	1.77099	1.77099	1.77099	1.77099	1.77099
3425401B19Rik	-1.10883	-1.84423	1.65315	0.228214	-2.9883	-2.9883	-2.9883	-1.87947	-1.87947	-1.87947	-1.87947	-1.87947
3632454L22Rik	0.21567	-0.214743	0.541134	0.479277	-0.17874	-0.17874	-0.17874	-0.39441	-0.39441	-0.39441	-0.39441	-0.39441
3830403N18Rik	1.61902	-1.37146	4.6753	0.056564	-0.779962	-0.779962	-0.779962	-2.39898	-2.39898	-2.39898	-2.39898	-2.39898
3830406C13Rik	0.0701907	4.02423	0.376161	0.553696	4.0627	4.0627	4.0627	3.9925	3.9925	3.9925	3.9925	3.9925
3830408C21Rik	-0.376551	2.67303	2.66435	0.134437	2.41349	2.41349	2.41349	2.79005	2.79005	2.79005	2.79005	2.79005
3930402G23Rik	0.394482	-1.43687	0.531554	0.483091	-1.45435	-1.45435	-1.45435	-1.84883	-1.84883	-1.84883	-1.84883	-1.84883
4430402I18Rik	-0.248931	1.64523	0.973002	0.347767	1.4568	1.4568	1.4568	1.70574	1.70574	1.70574	1.70574	1.70574
4632404H12Rik	-0.15373	3.49099	1.88946	0.200014	3.38545	3.38545	3.38545	3.53918	3.53918	3.53918	3.53918	3.53918
4632427E13Rik	-0.118215	2.1917	0.172978	0.68648	2.09901	2.09901	2.09901	2.21722	2.21722	2.21722	2.21722	2.21722
4732440D04Rik	-0.414139	1.38773	2.42065	0.151563	1.08315	1.08315	1.08315	1.49729	1.49729	1.49729	1.49729	1.49729
4732471J01Rik	-0.188007	0.681553	0.211112	0.655966	0.506365	0.506365	0.506365	0.694372	0.694372	0.694372	0.694372	0.694372
4732491K20Rik	-0.159401	1.8986	0.663938	0.434615	1.77418	1.77418	1.77418	1.93358	1.93358	1.93358	1.93358	1.93358
4833417C18Rik	-0.285434	-0.24094	0.658666	0.436387	-0.538192	-0.538192	-0.538192	-0.252758	-0.252758	-0.252758	-0.252758	-0.252758
4833418N02Rik	0.45615	0.476486	2.53648	0.143093	0.691102	0.691102	0.691102	0.234952	0.234952	0.234952	0.234952	0.234952
4833420G17Rik	-0.101512	5.9626	0.447659	0.518969	5.89695	5.89695	5.89695	5.99846	5.99846	5.99846	5.99846	5.99846
4833422C13Rik	0.183123	3.44616	2.33399	0.158329	3.55053	3.55053	3.55053	3.3674	3.3674	3.3674	3.3674	3.3674
4833428L15Rik	-0.185298	-1.18397	0.154325	0.702883	-1.50909	-1.50909	-1.50909	-1.3238	-1.3238	-1.3238	-1.3238	-1.3238
4833438C02Rik	-0.220089	2.28275	1.4254	0.260741	2.12223	2.12223	2.12223	2.34232	2.34232	2.34232	2.34232	2.34232
4833439L19Rik	-0.134666	7.8871	2.05077	0.183382	7.80109	7.80109	7.80109	7.93575	7.93575	7.93575	7.93575	7.93575
4921504A21Rik	-0.4846	1.21185	3.85994	0.0785545	0.854758	0.854758	0.854758	1.33936	1.33936	1.33936	1.33936	1.33936
4921507P07Rik	0.414967	-1.46561	0.886792	0.369084	-1.45805	-1.45805	-1.45805	-1.87302	-1.87302	-1.87302	-1.87302	-1.87302
4921524J17Rik	0.0290794	3.50574	0.0610749	0.809928	3.51663	3.51663	3.51663	3.48755	3.48755	3.48755	3.48755	3.48755
4921531C22Rik	0.0310155	1.12205	0.0272431	0.872271	1.10262	1.10262	1.10262	1.07161	1.07161	1.07161	1.07161	1.07161
4921536K21Rik	-0.119118	-0.396248	0.0891738	0.771494	-0.589386	-0.589386	-0.589386	-0.470269	-0.470269	-0.470269	-0.470269	-0.470269
4922502N22Rik	-0.0724619	-0.24499	0.0390503	0.847406	-0.396813	-0.396813	-0.396813	-0.324351	-0.324351	-0.324351	-0.324351	-0.324351
4930402H24Rik	-0.348986	7.80943	4.11457	0.0706943	7.58116	7.58116	7.58116	7.93015	7.93015	7.93015	7.93015	7.93015
4930426L09Rik	0.284328	-1.15026	0.432887	0.525797	-1.17915	-1.17915	-1.17915	-1.46348	-1.46348	-1.46348	-1.46348	-1.46348
4930430F08Rik	-0.186654	4.38041	1.82899	0.206764	4.25675	4.25675	4.25675	4.44341	4.44341	4.44341	4.44341	4.44341
4930432K21Rik	-0.324582	1.28229	2.75635	0.128622	1.03458	1.03458	1.03458	1.35917	1.35917	1.35917	1.35917	1.35917
4930447C04Rik	-0.463552	-0.258621	0.566353	0.469483	-0.6689	-0.6689	-0.6689	-0.205348	-0.205348	-0.205348	-0.205348	-0.205348
4930447K03Rik	0.582765	-1.65151	1.81153	0.208769	-1.59587	-1.59587	-1.59587	-2.17863	-2.17863	-2.17863	-2.17863	-2.17863
4930451G09Rik	0.354494	0.758442	1.56665	0.239876	0.925021	0.925021	0.925021	0.570527	0.570527	0.570527	0.570527	0.570527
4930452B06Rik	0.902303	2.43516	15.7103	0.00280374	2.91765	2.91765	2.91765	2.01534	2.01534	2.01534	2.01534	2.01534
4930452G13Rik	-0.739068	3.04028	5.16831	0.0469309	2.526	2.526	2.526	3.26507	3.26507	3.26507	3.26507	3.26507
4930453N24Rik	0.00995046	4.80435	0.0138701	0.908638	4.80755	4.80755	4.80755	4.7976	4.7976	4.7976	4.7976	4.7976
4930503L19Rik	0.197323	5.21288	2.72904	0.130314	5.33078	5.33078	5.33078	5.13346	5.13346	5.13346	5.13346	5.13346
4930506C21Rik	0.190763	-0.610814	0.207564	0.658656	-0.628896	-0.628896	-0.628896	-0.819659	-0.819659	-0.819659	-0.819659	-0.819659
4930507D05Rik	-0.0567514	-0.748013	0.0236806	0.880837	-0.937072	-0.937072	-0.937072	-0.88032	-0.88032	-0.88032	-0.88032	-0.88032
4930509G22Rik	0.425681	-1.17556	0.378776	0.552346	-1.0854	-1.0854	-1.0854	-1.51108	-1.51108	-1.51108	-1.51108	-1.51108
4930511A08Rik	-0.147402	6.89859	3.17626	0.105808	6.80397	6.80397	6.80397	6.95137	6.95137	6.95137	6.95137	6.95137
4930513N10Rik	0.198297	0.266973	0.244936	0.63162	0.314639	0.314639	0.314639	0.116343	0.116343	0.116343	0.116343	0.116343
4930515G01Rik	-0.459834	-0.0194549	1.70873	0.221123	-0.417897	-0.417897	-0.417897	0.0419374	0.0419374	0.0419374	0.0419374	0.0419374
4930519K11Rik	-0.0387255	-0.949211	0.00824069	0.929506	-1.14296	-1.14296	-1.14296	-1.10423	-1.10423	-1.10423	-1.10423	-1.10423
4930520O04Rik	0.160228	-0.0014314	0.272532	0.613286	0.0143076	0.0143076	0.0143076	-0.14592	-0.14592	-0.14592	-0.14592	-0.14592
4930523C07Rik	0.245742	2.34272	0.738354	0.410807	2.4764	2.4764	2.4764	2.23066	2.23066	2.23066	2.23066	2.23066
4930525G20Rik	0.629666	-1.00453	2.40645	0.152645	-0.817251	-0.817251	-0.817251	-1.44692	-1.44692	-1.44692	-1.44692	-1.44692
4930539E08Rik	1.10384	-1.0287	4.63905	0.0573648	-0.615442	-0.615442	-0.615442	-1.71929	-1.71929	-1.71929	-1.71929	-1.71929
4930539J05Rik	-0.337767	0.533063	0.936224	0.356627	0.252697	0.252697	0.252697	0.590464	0.590464	0.590464	0.590464	0.590464
4930553P18Rik	-0.542906	-1.52766	0.923399	0.359797	-2.14378	-2.14378	-2.14378	-1.60087	-1.60087	-1.60087	-1.60087	-1.60087
4930556M19Rik	0.730342	-0.456818	2.16302	0.172872	-0.145423	-0.145423	-0.145423	-0.875765	-0.875765	-0.875765	-0.875765	-0.875765
4930558J18Rik	0.96182	0.0306826	6.44721	0.0299338	0.491013	0.491013	0.491013	-0.470806	-0.470806	-0.470806	-0.470806	-0.470806
4930570G19Rik	-0.158986	3.81488	0.368273	0.557806	3.7076	3.7076	3.7076	3.86659	3.86659	3.86659	3.86659	3.86659
4930577N17Rik	0.482475	-0.139901	1.42091	0.261446	0.0595543	0.0595543	0.0595543	-0.42292	-0.42292	-0.42292	-0.42292	-0.42292
4930578M01Rik	-0.548365	-0.0741865	2.99797	0.114808	-0.533374	-0.533374	-0.533374	0.0149908	0.0149908	0.0149908	0.0149908	0.0149908
4930579G24Rik	0.474058	2.16134	10.655	0.00879134	2.42185	2.42185	2.42185	1.94779	1.94779	1.94779	1.94779	1.94779
4930579K19Rik	0.471318	-1.5531	0.974226	0.347477	-1.54021	-1.54021	-1.54021	-2.01153	-2.01153	-2.01153	-2.01153	-2.01153
4930581F22Rik	-0.0599298	2.25621	0.0369205	0.851568	2.20143	2.20143	2.20143	2.26136	2.26136	2.26136	2.26136	2.26136
4930590J08Rik	-0.137724	0.496265	0.222506	0.64751	0.349411	0.349411	0.349411	0.487135	0.487135	0.487135	0.487135	0.487135
4930594M22Rik	0.168642	0.151159	0.211042	0.656019	0.187273	0.187273	0.187273	0.018631	0.018631	0.018631	0.018631	0.018631
4930599N23Rik	-0.136137	-1.51641	0.0454833	0.835509	-1.87954	-1.87954	-1.87954	-1.7434	-1.7434	-1.7434	-1.7434	-1.7434
4931406C07Rik	-0.19954	5.9471	6.17478	0.0328184	5.81762	5.81762	5.81762	6.01716	6.01716	6.01716	6.01716	6.01716
4931406P16Rik	0.00895334	7.23998	0.0133823	0.910251	7.24497	7.24497	7.24497	7.23602	7.23602	7.23602	7.23602	7.23602
4931414P19Rik	0.0869222	3.19198	0.321843	0.583321	3.2369	3.2369	3.2369	3.14998	3.14998	3.14998	3.14998	3.14998
4931428F04Rik	-0.152417	4.99171	1.68711	0.223844	4.89186	4.89186	4.89186	5.04427	5.04427	5.04427	5.04427	5.04427
4931440P22Rik	0.0157636	0.8476	0.00290266	0.958121	0.810576	0.810576	0.810576	0.794813	0.794813	0.794813	0.794813	0.794813
4932435O22Rik	-0.0882962	-0.15958	0.0383074	0.848844	-0.305977	-0.305977	-0.305977	-0.217681	-0.217681	-0.217681	-0.217681	-0.217681
4932438A13Rik	0.0347714	7.28585	0.104905	0.752859	7.30688	7.30688	7.30688	7.27211	7.27211	7.27211	7.27211	7.27211
4932438H23Rik	-0.603548	1.04133	4.39082	0.063244	0.589832	0.589832	0.589832	1.19338	1.19338	1.19338	1.19338	1.19338
4932441J04Rik	-0.553182	1.4378	7.1852	0.0235448	1.03308	1.03308	1.03308	1.58626	1.58626	1.58626	1.58626	1.58626
4933400C23Rik	-0.848777	-1.75811	1.98608	0.189823	-2.65976	-2.65976	-2.65976	-1.81099	-1.81099	-1.81099	-1.81099	-1.81099
4933404O12Rik	0.0176608	4.0079	0.0189464	0.89332	4.01375	4.01375	4.01375	3.99609	3.99609	3.99609	3.99609	3.99609
4933406C10Rik	-0.464338	-0.521804	1.66045	0.227265	-0.96408	-0.96408	-0.96408	-0.499742	-0.499742	-0.499742	-0.499742	-0.499742
4933406I18Rik	0.438809	-0.116082	1.02037	0.33683	0.0491543	0.0491543	0.0491543	-0.389655	-0.389655	-0.389655	-0.389655	-0.389655
4933407K13Rik	-0.0623789	2.92444	0.0823053	0.780198	2.87452	2.87452	2.87452	2.9369	2.9369	2.9369	2.9369	2.9369
4933407L21Rik	-0.7442	1.63967	11.9622	0.00636484	1.10099	1.10099	1.10099	1.84519	1.84519	1.84519	1.84519	1.84519
4933412E12Rik	0.240112	0.623133	0.928845	0.358446	0.712784	0.712784	0.712784	0.472672	0.472672	0.472672	0.472672	0.472672
4933416E14Rik	-0.700205	-1.04814	1.17435	0.304568	-1.69474	-1.69474	-1.69474	-0.994534	-0.994534	-0.994534	-0.994534	-0.994534
4933421O10Rik	0.0359334	2.9593	0.0492836	0.828893	2.97082	2.97082	2.97082	2.93489	2.93489	2.93489	2.93489	2.93489
4933427D14Rik	0.262714	1.1383	0.863929	0.37507	1.26061	1.26061	1.26061	0.9979	0.9979	0.9979	0.9979	0.9979
4933427I22Rik	-0.0793054	-1.33127	0.0174032	0.897728	-1.59664	-1.59664	-1.59664	-1.51734	-1.51734	-1.51734	-1.51734	-1.51734
4933430I17Rik	0.751029	-0.803753	4.27881	0.0661411	-0.516215	-0.516215	-0.516215	-1.26724	-1.26724	-1.26724	-1.26724	-1.26724
4933431E20Rik	-0.285594	6.6148	8.75898	0.0146709	6.42878	6.42878	6.42878	6.71437	6.71437	6.71437	6.71437	6.71437
4933433G15Rik	0.369375	-1.44367	0.677649	0.430062	-1.4687	-1.4687	-1.4687	-1.83807	-1.83807	-1.83807	-1.83807	-1.83807
4933434E20Rik	-0.102821	3.63074	0.457026	0.514724	3.55888	3.55888	3.55888	3.6617	3.6617	3.6617	3.6617	3.6617
4933439C10Rik	-0.28514	4.50439	3.42871	0.0945348	4.31583	4.31583	4.31583	4.60097	4.60097	4.60097	4.60097	4.60097
5031425E22Rik	-0.0831963	4.08824	0.437831	0.523493	4.03071	4.03071	4.03071	4.1139	4.1139	4.1139	4.1139	4.1139
5031439G07Rik	-0.0412446	7.8946	0.127472	0.728671	7.86829	7.86829	7.86829	7.90953	7.90953	7.90953	7.90953	7.90953
5033403F01Rik	0.334681	-0.578058	1.04313	0.331757	-0.506898	-0.506898	-0.506898	-0.841579	-0.841579	-0.841579	-0.841579	-0.841579
5033406O09Rik	0.330021	-1.45445	0.288001	0.603527	-1.49683	-1.49683	-1.49683	-1.82685	-1.82685	-1.82685	-1.82685	-1.82685
5033417F24Rik	-0.140895	1.02614	0.304287	0.593617	0.894581	0.894581	0.894581	1.03548	1.03548	1.03548	1.03548	1.03548
5330413P13Rik	-0.766809	-0.110776	3.29562	0.100278	-0.720065	-0.720065	-0.720065	0.0467438	0.0467438	0.0467438	0.0467438	0.0467438
5330416C01Rik	0.277897	3.93967	1.95799	0.192714	4.10184	4.10184	4.10184	3.82394	3.82394	3.82394	3.82394	3.82394
5330417C22Rik	-0.126934	0.371568	0.19397	0.669231	0.222584	0.222584	0.222584	0.349517	0.349517	0.349517	0.349517	0.349517
5330434G04Rik	-0.159377	1.6601	0.474515	0.50697	1.5338	1.5338	1.5338	1.69318	1.69318	1.69318	1.69318	1.69318
5430402O13Rik	-0.544432	-1.6477	1.10161	0.31922	-2.32264	-2.32264	-2.32264	-1.77821	-1.77821	-1.77821	-1.77821	-1.77821
5430405H02Rik	-0.210778	2.83904	1.90891	0.197905	2.69185	2.69185	2.69185	2.90263	2.90263	2.90263	2.90263	2.90263
5430416N02Rik	-0.0848848	3.10094	0.205523	0.660216	3.03757	3.03757	3.03757	3.12245	3.12245	3.12245	3.12245	3.12245
5430427O19Rik	0.617771	0.143516	2.03811	0.18462	0.418277	0.418277	0.418277	-0.199494	-0.199494	-0.199494	-0.199494	-0.199494
5430440P10Rik	0.379333	-1.22748	0.853212	0.377928	-1.20133	-1.20133	-1.20133	-1.58067	-1.58067	-1.58067	-1.58067	-1.58067
5530601H04Rik	-0.112029	4.2864	0.541999	0.478935	4.211	4.211	4.211	4.32303	4.32303	4.32303	4.32303	4.32303
5730405O15Rik	0.111676	-0.506381	0.0926951	0.767174	-0.561421	-0.561421	-0.561421	-0.673097	-0.673097	-0.673097	-0.673097	-0.673097
5730409E04Rik	0.0455084	3.46968	0.145276	0.711261	3.4904	3.4904	3.4904	3.44489	3.44489	3.44489	3.44489	3.44489
5730455P16Rik	-0.0190335	5.70153	0.0525525	0.823415	5.68783	5.68783	5.68783	5.70687	5.70687	5.70687	5.70687	5.70687
5730480H06Rik	-0.0901199	3.93101	0.376844	0.553343	3.86848	3.86848	3.86848	3.9586	3.9586	3.9586	3.9586	3.9586
5830408C22Rik	0.0658163	1.02526	0.0594508	0.812417	1.02296	1.02296	1.02296	0.957146	0.957146	0.957146	0.957146	0.957146
5830432E09Rik	-0.151669	-0.639897	0.126419	0.729742	-0.883504	-0.883504	-0.883504	-0.731835	-0.731835	-0.731835	-0.731835	-0.731835
5830444B04Rik	-0.498806	-1.04176	0.256091	0.624058	-1.5067	-1.5067	-1.5067	-1.0079	-1.0079	-1.0079	-1.0079	-1.0079
5830454E08Rik	-0.110361	-0.779802	0.105869	0.751768	-0.991987	-0.991987	-0.991987	-0.881626	-0.881626	-0.881626	-0.881626	-0.881626
5930430L01Rik	0.307551	0.449957	1.23518	0.293043	0.579137	0.579137	0.579137	0.271587	0.271587	0.271587	0.271587	0.271587
6030407O03Rik	-0.541754	2.40684	5.10135	0.0481132	2.02872	2.02872	2.02872	2.57047	2.57047	2.57047	2.57047	2.57047
6030443J06Rik	-0.30418	1.49031	0.870522	0.373329	1.26503	1.26503	1.26503	1.56921	1.56921	1.56921	1.56921	1.56921
6030458C11Rik	-0.0164419	5.15753	0.0129342	0.91176	5.14469	5.14469	5.14469	5.16113	5.16113	5.16113	5.16113	5.16113
6230400D17Rik	-0.34735	0.00552736	0.921277	0.360326	-0.308064	-0.308064	-0.308064	0.0392855	0.0392855	0.0392855	0.0392855	0.0392855
6330403K07Rik	-0.309378	5.97336	3.86466	0.0783989	5.77122	5.77122	5.77122	6.0806	6.0806	6.0806	6.0806	6.0806
6330415G19Rik	0.118256	-1.28843	0.037497	0.850429	-1.41942	-1.41942	-1.41942	-1.53767	-1.53767	-1.53767	-1.53767	-1.53767
6330418K02Rik	-0.204196	1.49138	0.685131	0.427611	1.32691	1.32691	1.32691	1.5311	1.5311	1.5311	1.5311	1.5311
6330420H09Rik	0.861589	0.894751	7.6404	0.0204291	1.32932	1.32932	1.32932	0.46773	0.46773	0.46773	0.46773	0.46773
6330549D23Rik	-0.494728	-0.25921	3.19831	0.104758	-0.697167	-0.697167	-0.697167	-0.202439	-0.202439	-0.202439	-0.202439	-0.202439
6430503K07Rik	-0.41856	1.31561	3.55544	0.089446	1.00195	1.00195	1.00195	1.42051	1.42051	1.42051	1.42051	1.42051
6430548M08Rik	-0.091332	5.81026	1.45065	0.256832	5.75106	5.75106	5.75106	5.84239	5.84239	5.84239	5.84239	5.84239
6430550D23Rik	-0.0965406	0.294604	0.0568772	0.816437	0.165047	0.165047	0.165047	0.261588	0.261588	0.261588	0.261588	0.261588
6430571L13Rik	-0.0139933	1.56645	0.00448954	0.947932	1.52888	1.52888	1.52888	1.54288	1.54288	1.54288	1.54288	1.54288
6430584L05Rik	-1.08917	-1.19633	4.44518	0.0618948	-2.16111	-2.16111	-2.16111	-1.07194	-1.07194	-1.07194	-1.07194	-1.07194
6530402F18Rik	-0.0710872	3.67577	0.525231	0.485638	3.62433	3.62433	3.62433	3.69542	3.69542	3.69542	3.69542	3.69542
6530411M01Rik	-0.310792	2.53715	1.38249	0.267576	2.31902	2.31902	2.31902	2.62981	2.62981	2.62981	2.62981	2.62981
6720483E21Rik	0.59719	-0.924725	1.04823	0.330633	-0.740838	-0.740838	-0.740838	-1.33803	-1.33803	-1.33803	-1.33803	-1.33803
6720489N17Rik	0.185268	2.89072	1.32118	0.277781	2.99324	2.99324	2.99324	2.80797	2.80797	2.80797	2.80797	2.80797
6820408C15Rik	-0.453498	-0.131145	0.969595	0.348574	-0.535186	-0.535186	-0.535186	-0.0816875	-0.0816875	-0.0816875	-0.0816875	-0.0816875
6820431F20Rik	0.0815513	2.85217	0.215868	0.652403	2.89182	2.89182	2.89182	2.81027	2.81027	2.81027	2.81027	2.81027
8030423F21Rik	-0.169975	-1.1615	0.0757303	0.78891	-1.47701	-1.47701	-1.47701	-1.30703	-1.30703	-1.30703	-1.30703	-1.30703
8030462N17Rik	-0.00496875	4.98598	0.00463375	0.947104	4.98028	4.98028	4.98028	4.98525	4.98525	4.98525	4.98525	4.98525
8430429K09Rik	0.0215415	1.90401	0.0129619	0.911666	1.8959	1.8959	1.8959	1.87436	1.87436	1.87436	1.87436	1.87436
9030025P20Rik	-0.145256	2.13063	0.0810572	0.781822	2.01479	2.01479	2.01479	2.16005	2.16005	2.16005	2.16005	2.16005
9030612E09Rik	-0.00978061	-0.053891	0.000623705	0.980579	-0.158811	-0.158811	-0.158811	-0.149031	-0.149031	-0.149031	-0.149031	-0.149031
9030624G23Rik	-0.550759	-1.22955	1.16234	0.306918	-1.82027	-1.82027	-1.82027	-1.26951	-1.26951	-1.26951	-1.26951	-1.26951
9130019O22Rik	-0.154106	2.17131	0.827015	0.385056	2.05477	2.05477	2.05477	2.20888	2.20888	2.20888	2.20888	2.20888
9130019P16Rik	-1.77738	-0.634522	13.6417	0.00433123	-2.10607	-2.10607	-2.10607	-0.328688	-0.328688	-0.328688	-0.328688	-0.328688
9130023H24Rik	0.0329839	2.99357	0.069595	0.797416	3.00389	3.00389	3.00389	2.97091	2.97091	2.97091	2.97091	2.97091
9130213A22Rik	0.11791	0.69049	0.190683	0.671855	0.711794	0.711794	0.711794	0.593883	0.593883	0.593883	0.593883	0.593883
9130221H12Rik	0.0911987	2.5195	0.265634	0.617753	2.56091	2.56091	2.56091	2.46971	2.46971	2.46971	2.46971	2.46971
9130401M01Rik	-0.120388	2.7821	0.550447	0.475619	2.69256	2.69256	2.69256	2.81295	2.81295	2.81295	2.81295	2.81295
9230114K14Rik	0.0830447	2.17875	0.198654	0.665538	2.21244	2.21244	2.21244	2.1294	2.1294	2.1294	2.1294	2.1294
9230116N13Rik	-0.0672952	0.211167	0.0331353	0.859285	0.0930907	0.0930907	0.0930907	0.160386	0.160386	0.160386	0.160386	0.160386
9330102E08Rik	0.242999	1.65434	1.53738	0.244006	1.77551	1.77551	1.77551	1.53251	1.53251	1.53251	1.53251	1.53251
9330104G04Rik	-0.544364	1.35842	6.08687	0.0338212	0.956685	0.956685	0.956685	1.50105	1.50105	1.50105	1.50105	1.50105
9330111N05Rik	0.199755	-1.62828	0.117514	0.739018	-1.77716	-1.77716	-1.77716	-1.97691	-1.97691	-1.97691	-1.97691	-1.97691
9330151L19Rik	-0.257151	4.70108	3.57033	0.0888709	4.53169	4.53169	4.53169	4.78884	4.78884	4.78884	4.78884	4.78884
9330159F19Rik	-0.185397	5.41128	1.57369	0.238896	5.29033	5.29033	5.29033	5.47573	5.47573	5.47573	5.47573	5.47573
9330159M07Rik	0.184633	1.57595	0.58155	0.463747	1.65974	1.65974	1.65974	1.47511	1.47511	1.47511	1.47511	1.47511
9330179D12Rik	-0.0433169	0.314036	0.0166753	0.899876	0.211258	0.211258	0.211258	0.254575	0.254575	0.254575	0.254575	0.254575
9330182L06Rik	-0.207279	5.29963	1.46046	0.255336	5.16417	5.16417	5.16417	5.37145	5.37145	5.37145	5.37145	5.37145
9330188P03Rik	0.535231	3.75339	7.4789	0.0214733	4.05855	4.05855	4.05855	3.52332	3.52332	3.52332	3.52332	3.52332
9430015G10Rik	0.169607	4.91263	1.39606	0.265388	5.01359	5.01359	5.01359	4.84398	4.84398	4.84398	4.84398	4.84398
9430037G07Rik	0.202166	0.346321	0.608813	0.453752	0.404348	0.404348	0.404348	0.202182	0.202182	0.202182	0.202182	0.202182
9430038I01Rik	0.152595	2.53577	1.14217	0.310926	2.61541	2.61541	2.61541	2.46282	2.46282	2.46282	2.46282	2.46282
9430041J12Rik	-0.425963	2.09944	5.12012	0.0477781	1.79795	1.79795	1.79795	2.22391	2.22391	2.22391	2.22391	2.22391
9430078K24Rik	-0.016573	-1.66057	0.000440028	0.983687	-1.94713	-1.94713	-1.94713	-1.93056	-1.93056	-1.93056	-1.93056	-1.93056
9530026P05Rik	-0.437039	0.423125	1.50662	0.248453	0.0662723	0.0662723	0.0662723	0.503311	0.503311	0.503311	0.503311	0.503311
9530036O11Rik	-1.36054	-1.1841	5.94258	0.0355502	-2.39853	-2.39853	-2.39853	-1.03799	-1.03799	-1.03799	-1.03799	-1.03799
9530051G07Rik	-0.148835	-0.644523	0.107495	0.749942	-0.885184	-0.885184	-0.885184	-0.736349	-0.736349	-0.736349	-0.736349	-0.736349
9530052E02Rik	0.192025	-0.932063	0.174717	0.685005	-0.994781	-0.994781	-0.994781	-1.18681	-1.18681	-1.18681	-1.18681	-1.18681
9530059O14Rik	-1.23508	-0.319795	3.54012	0.0900423	-1.29746	-1.29746	-1.29746	-0.0623773	-0.0623773	-0.0623773	-0.0623773	-0.0623773
9530068E07Rik	0.0779207	7.32402	1.17911	0.303643	7.37172	7.37172	7.37172	7.2938	7.2938	7.2938	7.2938	7.2938
9530077C05Rik	0.072935	2.38718	0.166907	0.691699	2.41647	2.41647	2.41647	2.34354	2.34354	2.34354	2.34354	2.34354
9530080O11Rik	-0.0628017	-1.00786	0.0145238	0.906522	-1.22795	-1.22795	-1.22795	-1.16515	-1.16515	-1.16515	-1.16515	-1.16515
9530082P21Rik	-0.247847	2.34743	0.417543	0.533072	2.16772	2.16772	2.16772	2.41557	2.41557	2.41557	2.41557	2.41557
9630001P10Rik	-0.409898	1.15887	3.30861	0.0996982	0.847722	0.847722	0.847722	1.25762	1.25762	1.25762	1.25762	1.25762
9630013A20Rik	-0.891827	7.29706	5.23824	0.0457342	6.67824	6.67824	6.67824	7.57006	7.57006	7.57006	7.57006	7.57006
9630028B13Rik	-0.233998	0.619784	0.644875	0.441078	0.409533	0.409533	0.409533	0.643532	0.643532	0.643532	0.643532	0.643532
9630028I04Rik	0.214703	-0.436966	0.474258	0.507082	-0.424663	-0.424663	-0.424663	-0.639366	-0.639366	-0.639366	-0.639366	-0.639366
9930012K11Rik	0.565493	0.691307	3.0378	0.112716	0.970699	0.970699	0.970699	0.405206	0.405206	0.405206	0.405206	0.405206
9930021J03Rik	0.0237434	6.18574	0.107104	0.75038	6.19927	6.19927	6.19927	6.17553	6.17553	6.17553	6.17553	6.17553
9930104L06Rik	-0.221577	3.65814	2.06494	0.18201	3.50899	3.50899	3.50899	3.73057	3.73057	3.73057	3.73057	3.73057
9930111J21Rik1	0.395916	1.81549	1.95345	0.193187	2.02622	2.02622	2.02622	1.6303	1.6303	1.6303	1.6303	1.6303
9930111J21Rik2	0.57499	3.28099	4.86225	0.0526467	3.60534	3.60534	3.60534	3.03035	3.03035	3.03035	3.03035	3.03035
A030001D20Rik	0.136413	1.38454	0.415706	0.533955	1.4375	1.4375	1.4375	1.30109	1.30109	1.30109	1.30109	1.30109
A130010J15Rik	0.0570902	3.66232	0.2391	0.635664	3.69117	3.69117	3.69117	3.63408	3.63408	3.63408	3.63408	3.63408
A130077B15Rik	0.982361	0.942263	11.1196	0.00781792	1.43408	1.43408	1.43408	0.451719	0.451719	0.451719	0.451719	0.451719
A230009B12Rik	-0.617024	-0.346431	2.97424	0.116079	-0.878828	-0.878828	-0.878828	-0.261803	-0.261803	-0.261803	-0.261803	-0.261803
A230056J06Rik	-0.0342013	5.66996	0.13	0.726117	5.64672	5.64672	5.64672	5.68092	5.68092	5.68092	5.68092	5.68092
A230057D06Rik	-0.423532	4.07858	1.2574	0.288989	3.7946	3.7946	3.7946	4.21813	4.21813	4.21813	4.21813	4.21813
A230072E10Rik	0.457019	-1.29731	0.549628	0.475939	-1.2425	-1.2425	-1.2425	-1.69951	-1.69951	-1.69951	-1.69951	-1.69951
A230077H06Rik	0.0318325	4.0703	0.0290206	0.868213	4.0852	4.0852	4.0852	4.05336	4.05336	4.05336	4.05336	4.05336
A230103J11Rik	0.621388	-1.70784	1.66206	0.227056	-1.64947	-1.64947	-1.64947	-2.27086	-2.27086	-2.27086	-2.27086	-2.27086
A230107N01Rik	-0.37642	-0.221264	0.995205	0.342576	-0.58411	-0.58411	-0.58411	-0.20769	-0.20769	-0.20769	-0.20769	-0.20769
A2m	-0.64017	4.53541	4.63134	0.0575371	4.09914	4.09914	4.09914	4.73931	4.73931	4.73931	4.73931	4.73931
A330009N23Rik	-0.0199859	0.784979	0.00647574	0.937489	0.721622	0.721622	0.721622	0.741608	0.741608	0.741608	0.741608	0.741608
A330023F24Rik	-0.68612	-0.225225	2.35957	0.156292	-0.805994	-0.805994	-0.805994	-0.119875	-0.119875	-0.119875	-0.119875	-0.119875
A330041J22Rik	-0.31727	0.264774	1.17614	0.304219	-0.0141814	-0.0141814	-0.0141814	0.303089	0.303089	0.303089	0.303089	0.303089
A330048O09Rik	-0.703781	-0.30494	2.18823	0.170622	-0.901836	-0.901836	-0.901836	-0.198056	-0.198056	-0.198056	-0.198056	-0.198056
A330049N07Rik	0.826035	-0.985644	2.25679	0.16469	-0.689533	-0.689533	-0.689533	-1.51557	-1.51557	-1.51557	-1.51557	-1.51557
A330076H08Rik	-0.194452	3.20372	0.243484	0.63262	3.071	3.071	3.071	3.26545	3.26545	3.26545	3.26545	3.26545
A330102I10Rik	-0.142989	1.8271	0.27972	0.608708	1.71191	1.71191	1.71191	1.8549	1.8549	1.8549	1.8549	1.8549
A3galt2	-0.371375	-1.40433	0.535973	0.481325	-1.89579	-1.89579	-1.89579	-1.52442	-1.52442	-1.52442	-1.52442	-1.52442
A430005L14Rik	0.108382	3.57865	0.581376	0.463812	3.63845	3.63845	3.63845	3.53006	3.53006	3.53006	3.53006	3.53006
A430033K04Rik	0.0625712	3.92692	0.200127	0.664388	3.96038	3.96038	3.96038	3.89781	3.89781	3.89781	3.89781	3.89781
A430035B10Rik	-0.0756333	2.51245	0.215163	0.652928	2.45048	2.45048	2.45048	2.52611	2.52611	2.52611	2.52611	2.52611
A4galt	0.441012	1.4959	1.24978	0.29037	1.72744	1.72744	1.72744	1.28643	1.28643	1.28643	1.28643	1.28643
A530064D06Rik	0.0475359	-1.25465	0.00691713	0.935399	-1.42997	-1.42997	-1.42997	-1.47751	-1.47751	-1.47751	-1.47751	-1.47751
A530072M11Rik	0.042344	-0.919998	0.00620397	0.938812	-1.06093	-1.06093	-1.06093	-1.10327	-1.10327	-1.10327	-1.10327	-1.10327
A530076I17Rik	0.0171438	-0.542644	0.00107912	0.974457	-0.656299	-0.656299	-0.656299	-0.673443	-0.673443	-0.673443	-0.673443	-0.673443
A630001G21Rik	0.852064	2.79514	6.21021	0.0324245	3.25585	3.25585	3.25585	2.40378	2.40378	2.40378	2.40378	2.40378
A630072M18Rik	0.0829547	3.2665	0.617779	0.450544	3.30933	3.30933	3.30933	3.22638	3.22638	3.22638	3.22638	3.22638
A630089N07Rik	0.209243	2.60853	1.77517	0.21303	2.72286	2.72286	2.72286	2.51362	2.51362	2.51362	2.51362	2.51362
A730008H23Rik	0.450418	7.39832	6.29443	0.0315113	7.66248	7.66248	7.66248	7.21206	7.21206	7.21206	7.21206	7.21206
A730020M07Rik	-0.671052	-0.305026	2.13087	0.1758	-0.852566	-0.852566	-0.852566	-0.181514	-0.181514	-0.181514	-0.181514	-0.181514
A730036I17Rik	-1.30047	0.333083	6.07954	0.0339065	-0.67805	-0.67805	-0.67805	0.622425	0.622425	0.622425	0.622425	0.622425
A730056A06Rik	-0.27938	2.69384	3.08989	0.110052	2.49897	2.49897	2.49897	2.77835	2.77835	2.77835	2.77835	2.77835
A730063M14Rik	-0.45501	1.25974	2.47374	0.147602	0.917293	0.917293	0.917293	1.3723	1.3723	1.3723	1.3723	1.3723
A730081D07Rik	0.480271	-0.276937	1.4945	0.250235	-0.0924686	-0.0924686	-0.0924686	-0.57274	-0.57274	-0.57274	-0.57274	-0.57274
A830005F24Rik	-0.235285	-1.12065	0.155927	0.70143	-1.46773	-1.46773	-1.46773	-1.23244	-1.23244	-1.23244	-1.23244	-1.23244
A830010M20Rik	-0.00165171	4.49753	0.000138912	0.990834	4.49272	4.49272	4.49272	4.49437	4.49437	4.49437	4.49437	4.49437
A830011K09Rik	0.218011	0.247849	0.47322	0.507536	0.317495	0.317495	0.317495	0.0994833	0.0994833	0.0994833	0.0994833	0.0994833
A830018L16Rik	0.0227441	-0.565266	0.00415441	0.94991	-0.676954	-0.676954	-0.676954	-0.699698	-0.699698	-0.699698	-0.699698	-0.699698
A830082N09Rik	-0.189072	3.4506	1.80648	0.209354	3.3217	3.3217	3.3217	3.51077	3.51077	3.51077	3.51077	3.51077
A930003A15Rik	-0.594988	-1.31329	1.467	0.254345	-1.94033	-1.94033	-1.94033	-1.34534	-1.34534	-1.34534	-1.34534	-1.34534
A930003O13Rik	-0.0543871	3.56094	0.102998	0.755031	3.51988	3.51988	3.51988	3.57427	3.57427	3.57427	3.57427	3.57427
A930004D18Rik	0.35893	1.78249	2.79262	0.126418	1.9727	1.9727	1.9727	1.61377	1.61377	1.61377	1.61377	1.61377
A930005H10Rik	-0.661897	4.09942	13.1385	0.0048449	3.64593	3.64593	3.64593	4.30783	4.30783	4.30783	4.30783	4.30783
A930006K02Rik	-0.553211	0.558648	3.51244	0.091133	0.11966	0.11966	0.11966	0.672871	0.672871	0.672871	0.672871	0.672871
A930007I19Rik	-0.262326	0.558873	0.928847	0.358446	0.332824	0.332824	0.332824	0.59515	0.59515	0.59515	0.59515	0.59515
A930009A15Rik	-0.490454	4.22165	11.2756	0.00752084	3.8913	3.8913	3.8913	4.38176	4.38176	4.38176	4.38176	4.38176
A930011G23Rik	-0.483452	6.58411	3.43419	0.0943073	6.26221	6.26221	6.26221	6.74566	6.74566	6.74566	6.74566	6.74566
A930012L18Rik	-0.754976	-0.909271	2.48379	0.146868	-1.61661	-1.61661	-1.61661	-0.86163	-0.86163	-0.86163	-0.86163	-0.86163
A930017M01Rik	-0.0745432	2.14029	0.159369	0.698338	2.07357	2.07357	2.07357	2.14812	2.14812	2.14812	2.14812	2.14812
A930024E05Rik	0.740003	1.97307	18.3111	0.00170737	2.37137	2.37137	2.37137	1.63137	1.63137	1.63137	1.63137	1.63137
A930033H14Rik	0.200147	1.40314	1.02504	0.33578	1.49429	1.49429	1.49429	1.29414	1.29414	1.29414	1.29414	1.29414
A930037H05Rik	0.0406148	1.29929	0.0170163	0.898864	1.29327	1.29327	1.29327	1.25266	1.25266	1.25266	1.25266	1.25266
AA386476	0.241636	-0.637217	0.328894	0.579292	-0.62601	-0.62601	-0.62601	-0.867646	-0.867646	-0.867646	-0.867646	-0.867646
AA387883	0.534961	1.03117	3.15306	0.106927	1.30226	1.30226	1.30226	0.7673	0.7673	0.7673	0.7673	0.7673
AA413626	0.347201	-1.28326	0.284802	0.605517	-1.27385	-1.27385	-1.27385	-1.62105	-1.62105	-1.62105	-1.62105	-1.62105
AA465934	-0.285874	1.44458	1.61717	0.232969	1.22658	1.22658	1.22658	1.51245	1.51245	1.51245	1.51245	1.51245
AA986860	0.0376868	1.4178	0.0259101	0.875405	1.41374	1.41374	1.41374	1.37606	1.37606	1.37606	1.37606	1.37606
Aaas	0.537883	4.43073	29.6722	0.000307555	4.73942	4.73942	4.73942	4.20154	4.20154	4.20154	4.20154	4.20154
Aacs	-0.20265	6.45516	2.75752	0.12855	6.32406	6.32406	6.32406	6.52671	6.52671	6.52671	6.52671	6.52671
Aadat	0.549185	-0.763997	1.42936	0.260123	-0.595732	-0.595732	-0.595732	-1.14492	-1.14492	-1.14492	-1.14492	-1.14492
Aagab	0.198717	5.51086	4.17722	0.0689128	5.63032	5.63032	5.63032	5.43161	5.43161	5.43161	5.43161	5.43161
Aak1	0.189833	7.54914	4.79567	0.0540021	7.66437	7.66437	7.66437	7.47454	7.47454	7.47454	7.47454	7.47454
Aamdc	-0.298234	4.15215	7.88777	0.018947	3.95366	3.95366	3.95366	4.25189	4.25189	4.25189	4.25189	4.25189
Aamp	-0.120408	7.10965	3.20876	0.104265	7.03263	7.03263	7.03263	7.15304	7.15304	7.15304	7.15304	7.15304
Aar2	-0.091852	5.00473	1.10285	0.318961	4.94394	4.94394	4.94394	5.03579	5.03579	5.03579	5.03579	5.03579
Aard	0.100278	2.29909	0.220217	0.649187	2.34318	2.34318	2.34318	2.2429	2.2429	2.2429	2.2429	2.2429
Aars	0.024418	7.48495	0.128274	0.727857	7.49972	7.49972	7.49972	7.4753	7.4753	7.4753	7.4753	7.4753
Aars2	-0.245638	4.56885	5.34583	0.0439656	4.40674	4.40674	4.40674	4.65238	4.65238	4.65238	4.65238	4.65238
Aarsd1	0.173891	-0.0230349	0.112083	0.744872	0.00121209	0.00121209	0.00121209	-0.172678	-0.172678	-0.172678	-0.172678	-0.172678
Aasdh	-0.316013	3.88094	2.77972	0.127196	3.66952	3.66952	3.66952	3.98554	3.98554	3.98554	3.98554	3.98554
Aasdhppt	-0.0385257	4.65574	0.0861481	0.775282	4.6281	4.6281	4.6281	4.66663	4.66663	4.66663	4.66663	4.66663
Aass	-0.884264	1.33669	6.8798	0.0259637	0.685009	0.685009	0.685009	1.56927	1.56927	1.56927	1.56927	1.56927
Aatf	-0.00666156	4.27025	0.0032809	0.955479	4.26175	4.26175	4.26175	4.26842	4.26842	4.26842	4.26842	4.26842
Aatk	-0.420687	8.5772	1.78091	0.21235	8.3	8.3	8.3	8.72069	8.72069	8.72069	8.72069	8.72069
AB124611	0.171177	2.55512	0.248304	0.629314	2.64381	2.64381	2.64381	2.47264	2.47264	2.47264	2.47264	2.47264
Abat	-0.392964	8.19997	20.3467	0.00119676	7.94181	7.94181	7.94181	8.33477	8.33477	8.33477	8.33477	8.33477
Abca1	0.165516	8.294	1.49362	0.250365	8.39497	8.39497	8.39497	8.22945	8.22945	8.22945	8.22945	8.22945
Abca13	0.0791007	-1.52369	0.0363261	0.852752	-1.74016	-1.74016	-1.74016	-1.81926	-1.81926	-1.81926	-1.81926	-1.81926
Abca2	-0.213408	8.4376	1.57183	0.239154	8.30028	8.30028	8.30028	8.51369	8.51369	8.51369	8.51369	8.51369
Abca3	-0.0402983	7.42042	0.171181	0.688014	7.39465	7.39465	7.39465	7.43495	7.43495	7.43495	7.43495	7.43495
Abca4	0.11074	1.45039	0.0522283	0.82395	1.48863	1.48863	1.48863	1.37789	1.37789	1.37789	1.37789	1.37789
Abca5	0.122904	5.60495	1.41766	0.261957	5.67867	5.67867	5.67867	5.55577	5.55577	5.55577	5.55577	5.55577
Abca6	-0.024264	3.82076	0.0073149	0.933572	3.79953	3.79953	3.79953	3.8238	3.8238	3.8238	3.8238	3.8238
Abca7	-0.149446	5.92765	1.40091	0.264611	5.83102	5.83102	5.83102	5.98047	5.98047	5.98047	5.98047	5.98047
Abca8a	0.364081	3.00928	1.82648	0.207051	3.21658	3.21658	3.21658	2.8525	2.8525	2.8525	2.8525	2.8525
Abca8b	-0.0124231	4.93391	0.00594773	0.940086	4.92335	4.92335	4.92335	4.93577	4.93577	4.93577	4.93577	4.93577
Abca9	0.758731	6.77178	21.8925	0.000928936	7.19726	7.19726	7.19726	6.43853	6.43853	6.43853	6.43853	6.43853
Abcb10	-0.204718	5.01356	4.66384	0.0568158	4.87944	4.87944	4.87944	5.08416	5.08416	5.08416	5.08416	5.08416
Abcb1a	0.572699	5.62754	4.84135	0.0530677	5.9567	5.9567	5.9567	5.384	5.384	5.384	5.384	5.384
Abcb1b	0.173199	3.11386	1.5346	0.244403	3.21019	3.21019	3.21019	3.03699	3.03699	3.03699	3.03699	3.03699
Abcb4	0.0350179	5.00005	0.0776595	0.786313	5.01927	5.01927	5.01927	4.98426	4.98426	4.98426	4.98426	4.98426
Abcb6	-0.22416	0.723255	0.63959	0.442898	0.524701	0.524701	0.524701	0.748861	0.748861	0.748861	0.748861	0.748861
Abcb7	0.128285	5.75061	1.74871	0.216204	5.82773	5.82773	5.82773	5.69944	5.69944	5.69944	5.69944	5.69944
Abcb8	-0.17934	5.68677	8.97551	0.0137969	5.57043	5.57043	5.57043	5.74977	5.74977	5.74977	5.74977	5.74977
Abcb9	-0.0455093	3.62225	0.146978	0.709662	3.58681	3.58681	3.58681	3.63232	3.63232	3.63232	3.63232	3.63232
Abcc1	-0.179325	5.91721	3.72934	0.0830097	5.80107	5.80107	5.80107	5.9804	5.9804	5.9804	5.9804	5.9804
Abcc10	-0.291415	4.77437	3.33931	0.0983451	4.58222	4.58222	4.58222	4.87364	4.87364	4.87364	4.87364	4.87364
Abcc12	-0.991241	0.139302	3.14409	0.107364	-0.648792	-0.648792	-0.648792	0.342449	0.342449	0.342449	0.342449	0.342449
Abcc3	0.635789	4.81244	5.86632	0.0365079	5.17399	5.17399	5.17399	4.5382	4.5382	4.5382	4.5382	4.5382
Abcc4	-0.0163054	5.04063	0.0128489	0.91205	5.02773	5.02773	5.02773	5.04404	5.04404	5.04404	5.04404	5.04404
Abcc5	-0.182232	7.63189	0.718576	0.416925	7.51486	7.51486	7.51486	7.69709	7.69709	7.69709	7.69709	7.69709
Abcc6	0.611524	2.66918	5.0686	0.0487049	3.00968	3.00968	3.00968	2.39816	2.39816	2.39816	2.39816	2.39816
Abcc8	-0.210681	-0.600296	0.0775572	0.78645	-0.875549	-0.875549	-0.875549	-0.664868	-0.664868	-0.664868	-0.664868	-0.664868
Abcc9	0.111209	3.57436	0.156275	0.701116	3.63601	3.63601	3.63601	3.5248	3.5248	3.5248	3.5248	3.5248
Abcd1	0.145318	5.54781	2.13208	0.175688	5.6353	5.6353	5.6353	5.48998	5.48998	5.48998	5.48998	5.48998
Abcd2	-0.0175199	5.31114	0.0199354	0.890591	5.29813	5.29813	5.29813	5.31565	5.31565	5.31565	5.31565	5.31565
Abcd3	-0.102171	7.70396	1.36309	0.270747	7.63882	7.63882	7.63882	7.74099	7.74099	7.74099	7.74099	7.74099
Abcd4	-0.220421	4.98779	3.35376	0.0977165	4.84337	4.84337	4.84337	5.06379	5.06379	5.06379	5.06379	5.06379
Abce1	0.0119172	7.12595	0.0123363	0.913814	7.13271	7.13271	7.13271	7.12079	7.12079	7.12079	7.12079	7.12079
Abcf1	0.0531485	6.55506	0.632922	0.445213	6.58714	6.58714	6.58714	6.53399	6.53399	6.53399	6.53399	6.53399
Abcf2	-0.0327372	6.17944	0.146273	0.710324	6.15771	6.15771	6.15771	6.19045	6.19045	6.19045	6.19045	6.19045
Abcf3	-0.0310708	5.80495	0.17458	0.685121	5.78406	5.78406	5.78406	5.81513	5.81513	5.81513	5.81513	5.81513
Abcg1	0.0593207	6.29822	0.249042	0.628811	6.33407	6.33407	6.33407	6.27475	6.27475	6.27475	6.27475	6.27475
Abcg2	0.183968	5.62832	5.31873	0.044403	5.73892	5.73892	5.73892	5.55495	5.55495	5.55495	5.55495	5.55495
Abcg3	0.429712	1.95886	1.18337	0.302816	2.18953	2.18953	2.18953	1.75981	1.75981	1.75981	1.75981	1.75981
Abcg4	-0.14384	4.9799	2.25732	0.164645	4.88566	4.88566	4.88566	5.0295	5.0295	5.0295	5.0295	5.0295
Abhd1	-0.64564	2.96348	1.32002	0.27798	2.51356	2.51356	2.51356	3.1592	3.1592	3.1592	3.1592	3.1592
Abhd10	0.142967	4.25954	1.13666	0.312035	4.34299	4.34299	4.34299	4.20003	4.20003	4.20003	4.20003	4.20003
Abhd11	-0.215042	4.23017	4.50763	0.0603887	4.0874	4.0874	4.0874	4.30244	4.30244	4.30244	4.30244	4.30244
Abhd11os	0.0751653	-1.70883	0.0247688	0.878154	-1.96732	-1.96732	-1.96732	-2.04249	-2.04249	-2.04249	-2.04249	-2.04249
Abhd12	0.0132969	8.32467	0.0289198	0.868439	8.33272	8.33272	8.33272	8.31942	8.31942	8.31942	8.31942	8.31942
Abhd13	-0.0146844	5.77903	0.0285814	0.869203	5.76819	5.76819	5.76819	5.78288	5.78288	5.78288	5.78288	5.78288
Abhd14a	-0.0426994	4.17925	0.140378	0.715922	4.1478	4.1478	4.1478	4.1905	4.1905	4.1905	4.1905	4.1905
Abhd14b	-0.244724	2.72914	1.01688	0.33762	2.55783	2.55783	2.55783	2.80255	2.80255	2.80255	2.80255	2.80255
Abhd15	0.522923	2.27291	6.20298	0.0325044	2.56112	2.56112	2.56112	2.0382	2.0382	2.0382	2.0382	2.0382
Abhd16a	-0.270585	6.18509	17.5788	0.00195325	6.0089	6.0089	6.0089	6.27949	6.27949	6.27949	6.27949	6.27949
Abhd17a	-0.133226	6.07098	1.53529	0.244305	5.98523	5.98523	5.98523	6.11845	6.11845	6.11845	6.11845	6.11845
Abhd17b	-0.155222	6.51768	0.788107	0.396035	6.41756	6.41756	6.41756	6.57279	6.57279	6.57279	6.57279	6.57279
Abhd17c	0.0319839	5.93466	0.213446	0.654212	5.95328	5.95328	5.95328	5.9213	5.9213	5.9213	5.9213	5.9213
Abhd18	-0.250483	4.47629	5.14431	0.0473505	4.31072	4.31072	4.31072	4.5612	4.5612	4.5612	4.5612	4.5612
Abhd2	0.230592	8.9268	9.01087	0.0136602	9.06638	9.06638	9.06638	8.83579	8.83579	8.83579	8.83579	8.83579
Abhd3	-0.249052	6.49869	2.40304	0.152907	6.33719	6.33719	6.33719	6.58624	6.58624	6.58624	6.58624	6.58624
Abhd4	-0.173356	7.6932	1.76936	0.213721	7.58202	7.58202	7.58202	7.75538	7.75538	7.75538	7.75538	7.75538
Abhd5	-0.135759	5.7042	1.6489	0.228768	5.61608	5.61608	5.61608	5.75184	5.75184	5.75184	5.75184	5.75184
Abhd6	0.0338074	5.22437	0.148553	0.708193	5.24323	5.24323	5.24323	5.20943	5.20943	5.20943	5.20943	5.20943
Abhd8	-0.0193026	4.7854	0.00985163	0.922946	4.77035	4.77035	4.77035	4.78965	4.78965	4.78965	4.78965	4.78965
Abi1	-0.041221	6.94509	0.24518	0.631452	6.91845	6.91845	6.91845	6.95967	6.95967	6.95967	6.95967	6.95967
Abi2	0.00334551	7.48488	0.0014967	0.96992	7.48647	7.48647	7.48647	7.48312	7.48312	7.48312	7.48312	7.48312
Abi3	0.691535	4.27277	7.61156	0.020611	4.66159	4.66159	4.66159	3.97006	3.97006	3.97006	3.97006	3.97006
Abi3bp	-0.0497913	0.74609	0.0106733	0.919809	0.659475	0.659475	0.659475	0.709266	0.709266	0.709266	0.709266	0.709266
Abitram	-0.152865	4.99004	2.36219	0.156085	4.8898	4.8898	4.8898	5.04267	5.04267	5.04267	5.04267	5.04267
Abl1	-0.0542886	7.57947	0.189235	0.67302	7.54481	7.54481	7.54481	7.5991	7.5991	7.5991	7.5991	7.5991
Abl2	-0.0396839	6.38168	0.371636	0.556046	6.35574	6.35574	6.35574	6.39542	6.39542	6.39542	6.39542	6.39542
Ablim1	0.400675	5.86364	3.02911	0.113168	6.09953	6.09953	6.09953	5.69885	5.69885	5.69885	5.69885	5.69885
Ablim2	-0.527157	5.1811	4.61591	0.0578836	4.82703	4.82703	4.82703	5.35419	5.35419	5.35419	5.35419	5.35419
Ablim3	-0.362487	2.3823	1.92814	0.195849	2.12876	2.12876	2.12876	2.49125	2.49125	2.49125	2.49125	2.49125
Abr	-0.300009	8.13964	17.6157	0.00193987	7.94464	7.94464	7.94464	8.24465	8.24465	8.24465	8.24465	8.24465
Abracl	0.19734	3.27177	1.70994	0.220971	3.3834	3.3834	3.3834	3.18606	3.18606	3.18606	3.18606	3.18606
Abraxas1	-0.0303553	3.05297	0.0515322	0.825105	3.02394	3.02394	3.02394	3.0543	3.0543	3.0543	3.0543	3.0543
Abraxas2	0.0298294	4.86833	0.150583	0.706312	4.88411	4.88411	4.88411	4.85428	4.85428	4.85428	4.85428	4.85428
Abt1	0.00205961	3.40394	0.000244264	0.987845	3.39723	3.39723	3.39723	3.39517	3.39517	3.39517	3.39517	3.39517
Abtb1	-0.0682767	4.8338	0.22938	0.642538	4.78788	4.78788	4.78788	4.85616	4.85616	4.85616	4.85616	4.85616
Abtb2	-0.327911	7.76862	5.09133	0.0482933	7.55466	7.55466	7.55466	7.88257	7.88257	7.88257	7.88257	7.88257
Acaa1a	-0.25589	6.33612	15.9249	0.0026859	6.16991	6.16991	6.16991	6.4258	6.4258	6.4258	6.4258	6.4258
Acaa1b	0.94615	-0.10057	8.83603	0.0143523	0.33743	0.33743	0.33743	-0.60872	-0.60872	-0.60872	-0.60872	-0.60872
Acaa2	-0.165763	4.61131	0.757388	0.405054	4.50203	4.50203	4.50203	4.6678	4.6678	4.6678	4.6678	4.6678
Acaca	-0.0584639	6.9576	0.536219	0.481227	6.92003	6.92003	6.92003	6.9785	6.9785	6.9785	6.9785	6.9785
Acacb	0.0754238	3.38578	0.259837	0.621565	3.42488	3.42488	3.42488	3.34945	3.34945	3.34945	3.34945	3.34945
Acad10	-0.0379135	2.05394	0.021953	0.88523	2.00885	2.00885	2.00885	2.04676	2.04676	2.04676	2.04676	2.04676
Acad11	-0.0962755	4.83122	1.22414	0.295087	4.76725	4.76725	4.76725	4.86353	4.86353	4.86353	4.86353	4.86353
Acad12	-0.261009	2.33815	3.12559	0.108272	2.15247	2.15247	2.15247	2.41348	2.41348	2.41348	2.41348	2.41348
Acad8	-0.179167	4.72201	3.88145	0.0778496	4.60421	4.60421	4.60421	4.78338	4.78338	4.78338	4.78338	4.78338
Acad9	-0.0246691	5.38816	0.105687	0.751974	5.37073	5.37073	5.37073	5.3954	5.3954	5.3954	5.3954	5.3954
Acadl	-0.163997	5.68885	1.97578	0.190877	5.58269	5.58269	5.58269	5.74669	5.74669	5.74669	5.74669	5.74669
Acadm	-0.136345	5.83451	2.54237	0.142678	5.74639	5.74639	5.74639	5.88274	5.88274	5.88274	5.88274	5.88274
Acads	-0.11202	4.77005	0.799609	0.392738	4.696	4.696	4.696	4.80802	4.80802	4.80802	4.80802	4.80802
Acadsb	-0.114997	6.39584	1.94747	0.193811	6.32185	6.32185	6.32185	6.43685	6.43685	6.43685	6.43685	6.43685
Acadvl	-0.242631	5.96435	4.53166	0.0598213	5.80661	5.80661	5.80661	6.04924	6.04924	6.04924	6.04924	6.04924
Acan	-0.130613	5.31802	0.644734	0.441127	5.23289	5.23289	5.23289	5.3635	5.3635	5.3635	5.3635	5.3635
Acap1	-0.0787399	-0.828103	0.0408045	0.844066	-1.04306	-1.04306	-1.04306	-0.964319	-0.964319	-0.964319	-0.964319	-0.964319
Acap2	0.0255057	7.33287	0.0612859	0.809608	7.3482	7.3482	7.3482	7.3227	7.3227	7.3227	7.3227	7.3227
Acap3	-0.373929	8.52068	6.10329	0.0336311	8.27566	8.27566	8.27566	8.64959	8.64959	8.64959	8.64959	8.64959
Acat1	-0.0434479	6.92608	0.222929	0.647202	6.89811	6.89811	6.89811	6.94156	6.94156	6.94156	6.94156	6.94156
Acat2	-0.209144	6.46772	1.92641	0.196033	6.33227	6.33227	6.33227	6.54142	6.54142	6.54142	6.54142	6.54142
Acat3	-0.748638	1.40739	9.92518	0.0106364	0.86119	0.86119	0.86119	1.60983	1.60983	1.60983	1.60983	1.60983
Acbd3	-0.0395259	5.93923	0.197506	0.666438	5.91291	5.91291	5.91291	5.95244	5.95244	5.95244	5.95244	5.95244
Acbd4	-0.196514	3.73687	1.16803	0.305802	3.60432	3.60432	3.60432	3.80083	3.80083	3.80083	3.80083	3.80083
Acbd5	-0.0776485	6.41391	1.03554	0.333435	6.36383	6.36383	6.36383	6.44148	6.44148	6.44148	6.44148	6.44148
Acbd6	-0.0341377	5.11377	0.107473	0.749967	5.09005	5.09005	5.09005	5.12419	5.12419	5.12419	5.12419	5.12419
Accs	-0.00806283	4.80588	0.00322831	0.955837	4.79787	4.79787	4.79787	4.80594	4.80594	4.80594	4.80594	4.80594
Accsl	-0.582398	-1.62413	0.703528	0.421679	-2.28722	-2.28722	-2.28722	-1.70482	-1.70482	-1.70482	-1.70482	-1.70482
Acd	-0.0861108	4.78586	0.717818	0.417162	4.72841	4.72841	4.72841	4.81452	4.81452	4.81452	4.81452	4.81452
Ace	0.254025	5.11318	2.01564	0.186844	5.26421	5.26421	5.26421	5.01018	5.01018	5.01018	5.01018	5.01018
Ace2	0.480798	1.28224	1.41285	0.262715	1.53337	1.53337	1.53337	1.05257	1.05257	1.05257	1.05257	1.05257
Acer2	-0.25339	3.19164	1.03169	0.334292	3.01808	3.01808	3.01808	3.27147	3.27147	3.27147	3.27147	3.27147
Acer3	0.242154	4.76613	7.32364	0.0225393	4.90973	4.90973	4.90973	4.66758	4.66758	4.66758	4.66758	4.66758
Ache	-0.267163	5.68491	2.89028	0.120719	5.51068	5.51068	5.51068	5.77784	5.77784	5.77784	5.77784	5.77784
Acin1	-0.052858	7.99265	0.147205	0.70945	7.95905	7.95905	7.95905	8.01191	8.01191	8.01191	8.01191	8.01191
Ackr1	-0.429404	3.31661	1.87271	0.201854	3.02542	3.02542	3.02542	3.45482	3.45482	3.45482	3.45482	3.45482
Ackr2	0.608184	0.626401	1.94088	0.194504	0.921319	0.921319	0.921319	0.313134	0.313134	0.313134	0.313134	0.313134
Ackr3	0.00939249	5.6126	0.00383312	0.951883	5.61681	5.61681	5.61681	5.60742	5.60742	5.60742	5.60742	5.60742
Ackr4	-0.0342324	-1.39505	0.00229757	0.962737	-1.65022	-1.65022	-1.65022	-1.61599	-1.61599	-1.61599	-1.61599	-1.61599
Acly	-0.0364427	8.12748	0.14609	0.710495	8.10427	8.10427	8.10427	8.14071	8.14071	8.14071	8.14071	8.14071
Aco1	-0.132019	6.90357	4.65834	0.0569371	6.81891	6.81891	6.81891	6.95093	6.95093	6.95093	6.95093	6.95093
Aco2	-0.158178	8.50442	4.18125	0.0688002	8.40331	8.40331	8.40331	8.56148	8.56148	8.56148	8.56148	8.56148
Acot1	-0.0780176	5.33444	0.578634	0.464838	5.28313	5.28313	5.28313	5.36115	5.36115	5.36115	5.36115	5.36115
Acot11	-0.444219	5.72557	26.1693	0.000490491	5.43062	5.43062	5.43062	5.87484	5.87484	5.87484	5.87484	5.87484
Acot12	0.523725	-0.620042	2.44636	0.149628	-0.447913	-0.447913	-0.447913	-0.971638	-0.971638	-0.971638	-0.971638	-0.971638
Acot13	-0.145994	4.18285	1.0432	0.33174	4.08517	4.08517	4.08517	4.23116	4.23116	4.23116	4.23116	4.23116
Acot2	-0.0421309	4.18558	0.143738	0.712714	4.1545	4.1545	4.1545	4.19663	4.19663	4.19663	4.19663	4.19663
Acot4	-0.478032	-0.335849	1.26918	0.286872	-0.775648	-0.775648	-0.775648	-0.297617	-0.297617	-0.297617	-0.297617	-0.297617
Acot5	0.260688	-0.957554	0.336616	0.574945	-0.964033	-0.964033	-0.964033	-1.22472	-1.22472	-1.22472	-1.22472	-1.22472
Acot6	-0.0404935	3.78334	0.159438	0.698276	3.75176	3.75176	3.75176	3.79225	3.79225	3.79225	3.79225	3.79225
Acot7	-0.287234	5.17414	2.25233	0.165068	4.98552	4.98552	4.98552	5.27275	5.27275	5.27275	5.27275	5.27275
Acot8	-0.241272	3.51426	3.90715	0.0770177	3.35106	3.35106	3.35106	3.59234	3.59234	3.59234	3.59234	3.59234
Acot9	0.262453	3.06496	3.20759	0.10432	3.21391	3.21391	3.21391	2.95145	2.95145	2.95145	2.95145	2.95145
Acox1	-0.184727	8.46152	6.41166	0.030292	8.34307	8.34307	8.34307	8.5278	8.5278	8.5278	8.5278	8.5278
Acox2	-0.616388	-1.11687	1.02496	0.335797	-1.72419	-1.72419	-1.72419	-1.1078	-1.1078	-1.1078	-1.1078	-1.1078
Acox3	0.0315568	6.05891	0.094902	0.764513	6.07746	6.07746	6.07746	6.0459	6.0459	6.0459	6.0459	6.0459
Acp1	0.12861	4.6325	0.557643	0.472826	4.7082	4.7082	4.7082	4.57959	4.57959	4.57959	4.57959	4.57959
Acp2	0.0783055	7.16835	1.45065	0.256833	7.21622	7.21622	7.21622	7.13791	7.13791	7.13791	7.13791	7.13791
Acp5	0.0182946	0.665611	0.00398506	0.95094	0.621807	0.621807	0.621807	0.603513	0.603513	0.603513	0.603513	0.603513
Acp6	-0.296144	4.80007	5.8023	0.0373364	4.60485	4.60485	4.60485	4.90099	4.90099	4.90099	4.90099	4.90099
Acpp	1.46164	-0.0688388	2.33757	0.158042	0.571466	0.571466	0.571466	-0.890177	-0.890177	-0.890177	-0.890177	-0.890177
Acr	-0.155514	0.578153	0.265587	0.617783	0.422199	0.422199	0.422199	0.577713	0.577713	0.577713	0.577713	0.577713
Acrbp	-0.115647	2.41365	0.208024	0.658306	2.32466	2.32466	2.32466	2.44031	2.44031	2.44031	2.44031	2.44031
Acsbg1	-0.331567	7.90912	7.44359	0.0217103	7.69281	7.69281	7.69281	8.02437	8.02437	8.02437	8.02437	8.02437
Acsf2	-0.389961	5.08898	16.9629	0.00219383	4.83054	4.83054	4.83054	5.2205	5.2205	5.2205	5.2205	5.2205
Acsf3	-0.0475881	4.23721	0.199214	0.6651	4.20283	4.20283	4.20283	4.25042	4.25042	4.25042	4.25042	4.25042
Acsl1	-0.176697	5.62445	0.583512	0.463015	5.50938	5.50938	5.50938	5.68608	5.68608	5.68608	5.68608	5.68608
Acsl3	-0.360578	7.88335	3.90315	0.0771464	7.64719	7.64719	7.64719	8.00777	8.00777	8.00777	8.00777	8.00777
Acsl4	0.263249	5.29174	5.00886	0.0498074	5.4484	5.4484	5.4484	5.18515	5.18515	5.18515	5.18515	5.18515
Acsl5	0.235417	5.33059	7.00476	0.0249389	5.47134	5.47134	5.47134	5.23593	5.23593	5.23593	5.23593	5.23593
Acsl6	-0.337172	7.63361	14.3388	0.00372408	7.41337	7.41337	7.41337	7.75054	7.75054	7.75054	7.75054	7.75054
Acsm5	0.302566	-0.974906	0.441905	0.521609	-0.95437	-0.95437	-0.95437	-1.25694	-1.25694	-1.25694	-1.25694	-1.25694
Acss1	-0.0568282	6.81274	0.748177	0.407822	6.77624	6.77624	6.77624	6.83307	6.83307	6.83307	6.83307	6.83307
Acss2	-0.370791	6.22263	12.6836	0.00537417	5.97862	5.97862	5.97862	6.34941	6.34941	6.34941	6.34941	6.34941
Acss3	0.0324313	1.36237	0.0138813	0.908602	1.34952	1.34952	1.34952	1.31709	1.31709	1.31709	1.31709	1.31709
Acta1	0.323073	-1.05768	0.326666	0.580558	-1.03975	-1.03975	-1.03975	-1.36283	-1.36283	-1.36283	-1.36283	-1.36283
Acta2	0.581967	5.25392	1.28602	0.283882	5.58773	5.58773	5.58773	5.00576	5.00576	5.00576	5.00576	5.00576
Actb	0.292555	10.9666	8.63088	0.0152197	11.1423	11.1423	11.1423	10.8498	10.8498	10.8498	10.8498	10.8498
Actg1	0.00153077	9.1543	0.00021683	0.988548	9.1551	9.1551	9.1551	9.15357	9.15357	9.15357	9.15357	9.15357
Actg2	0.825487	-0.832048	1.09887	0.319793	-0.510843	-0.510843	-0.510843	-1.33633	-1.33633	-1.33633	-1.33633	-1.33633
Actl6a	-0.0149496	5.28598	0.0495252	0.828482	5.27445	5.27445	5.27445	5.2894	5.2894	5.2894	5.2894	5.2894
Actl6b	-0.204015	3.05121	1.17436	0.304564	2.90939	2.90939	2.90939	3.11341	3.11341	3.11341	3.11341	3.11341
Actn1	0.124684	5.49413	0.648882	0.439706	5.569	5.569	5.569	5.44432	5.44432	5.44432	5.44432	5.44432
Actn2	0.437151	-0.888449	1.14035	0.311293	-0.789745	-0.789745	-0.789745	-1.2269	-1.2269	-1.2269	-1.2269	-1.2269
Actn3	-0.425539	0.172449	1.18929	0.301677	-0.183246	-0.183246	-0.183246	0.242294	0.242294	0.242294	0.242294	0.242294
Actn4	0.238489	7.6137	5.46128	0.0421605	7.75765	7.75765	7.75765	7.51916	7.51916	7.51916	7.51916	7.51916
Actr10	-0.0639449	6.28949	0.658672	0.436385	6.24809	6.24809	6.24809	6.31204	6.31204	6.31204	6.31204	6.31204
Actr1a	-0.0745709	7.89228	0.764212	0.403023	7.84485	7.84485	7.84485	7.91942	7.91942	7.91942	7.91942	7.91942
Actr1b	-0.095063	6.99312	1.31191	0.279372	6.93234	6.93234	6.93234	7.0274	7.0274	7.0274	7.0274	7.0274
Actr2	0.14975	7.74594	4.44451	0.0619114	7.83733	7.83733	7.83733	7.68758	7.68758	7.68758	7.68758	7.68758
Actr3	0.166556	7.53497	4.26317	0.0665587	7.6364	7.6364	7.6364	7.46984	7.46984	7.46984	7.46984	7.46984
Actr3b	-0.211096	4.24654	3.89467	0.0774203	4.10643	4.10643	4.10643	4.31753	4.31753	4.31753	4.31753	4.31753
Actr5	-0.114467	3.8486	1.27773	0.285349	3.7701	3.7701	3.7701	3.88456	3.88456	3.88456	3.88456	3.88456
Actr6	-0.175068	4.20426	2.02403	0.18601	4.08767	4.08767	4.08767	4.26274	4.26274	4.26274	4.26274	4.26274
Actr8	-0.13675	5.34296	2.18433	0.170967	5.25383	5.25383	5.25383	5.39058	5.39058	5.39058	5.39058	5.39058
Acvr1	0.114819	5.14877	1.48088	0.252259	5.21719	5.21719	5.21719	5.10237	5.10237	5.10237	5.10237	5.10237
Acvr1b	-0.0346451	6.01071	0.264759	0.618325	5.98771	5.98771	5.98771	6.02235	6.02235	6.02235	6.02235	6.02235
Acvr1c	-0.573575	0.0130286	1.62641	0.231735	-0.467788	-0.467788	-0.467788	0.105788	0.105788	0.105788	0.105788	0.105788
Acvr2a	0.0381592	5.42833	0.0835892	0.778542	5.44987	5.44987	5.44987	5.41172	5.41172	5.41172	5.41172	5.41172
Acvr2b	-0.0703778	3.96429	0.404139	0.539586	3.91449	3.91449	3.91449	3.98487	3.98487	3.98487	3.98487	3.98487
Acvrl1	0.513572	4.83958	4.5591	0.0591815	5.13614	5.13614	5.13614	4.62257	4.62257	4.62257	4.62257	4.62257
Acy1	-0.175247	3.71025	1.97879	0.190569	3.59154	3.59154	3.59154	3.76679	3.76679	3.76679	3.76679	3.76679
Acy3	0.319425	1.09543	1.11646	0.316147	1.25101	1.25101	1.25101	0.931585	0.931585	0.931585	0.931585	0.931585
Acyp1	-0.178148	2.9428	1.19307	0.300952	2.81731	2.81731	2.81731	2.99546	2.99546	2.99546	2.99546	2.99546
Acyp2	-0.352625	3.12885	3.07976	0.110563	2.88769	2.88769	2.88769	3.24031	3.24031	3.24031	3.24031	3.24031
Ada	0.0176964	1.9919	0.00594409	0.940104	1.98074	1.98074	1.98074	1.96304	1.96304	1.96304	1.96304	1.96304
Adal	0.018639	4.68404	0.0229029	0.882794	4.69234	4.69234	4.69234	4.6737	4.6737	4.6737	4.6737	4.6737
Adam10	0.22006	7.62866	7.10616	0.0241434	7.7618	7.7618	7.7618	7.54174	7.54174	7.54174	7.54174	7.54174
Adam11	-0.475301	5.92503	4.22098	0.0677016	5.60853	5.60853	5.60853	6.08383	6.08383	6.08383	6.08383	6.08383
Adam12	0.28467	6.70412	9.6572	0.0114298	6.87454	6.87454	6.87454	6.58987	6.58987	6.58987	6.58987	6.58987
Adam15	0.395522	6.70701	9.84323	0.0108717	6.9406	6.9406	6.9406	6.54508	6.54508	6.54508	6.54508	6.54508
Adam17	0.160248	6.86367	4.17784	0.0688956	6.96098	6.96098	6.96098	6.80073	6.80073	6.80073	6.80073	6.80073
Adam18	-0.493558	0.238492	0.751304	0.406879	-0.170367	-0.170367	-0.170367	0.32319	0.32319	0.32319	0.32319	0.32319
Adam19	0.52134	4.91697	13.7509	0.00422858	5.21761	5.21761	5.21761	4.69627	4.69627	4.69627	4.69627	4.69627
Adam1a	0.0538379	1.74909	0.0244558	0.87892	1.7593	1.7593	1.7593	1.70546	1.70546	1.70546	1.70546	1.70546
Adam22	-0.120265	7.16384	1.1974	0.300125	7.08685	7.08685	7.08685	7.20711	7.20711	7.20711	7.20711	7.20711
Adam23	-0.238622	6.14182	0.98167	0.345726	5.98647	5.98647	5.98647	6.22509	6.22509	6.22509	6.22509	6.22509
Adam3	1.01517	-0.206499	4.13537	0.0700968	0.242899	0.242899	0.242899	-0.772267	-0.772267	-0.772267	-0.772267	-0.772267
Adam32	-0.0560168	-1.18092	0.0115246	0.916685	-1.43227	-1.43227	-1.43227	-1.37626	-1.37626	-1.37626	-1.37626	-1.37626
Adam33	0.199291	2.55973	0.336937	0.574766	2.66591	2.66591	2.66591	2.46662	2.46662	2.46662	2.46662	2.46662
Adam4	-0.000986803	-1.54934	2.10527e-06	0.998872	-1.81301	-1.81301	-1.81301	-1.81202	-1.81202	-1.81202	-1.81202	-1.81202
Adam5	-0.0683676	0.845359	0.0769418	0.787275	0.756395	0.756395	0.756395	0.824763	0.824763	0.824763	0.824763	0.824763
Adam8	-0.339911	2.34744	1.36654	0.270181	2.10669	2.10669	2.10669	2.44661	2.44661	2.44661	2.44661	2.44661
Adam9	0.0166263	8.51978	0.0373851	0.85065	8.52992	8.52992	8.52992	8.51329	8.51329	8.51329	8.51329	8.51329
Adamts1	0.40296	5.71843	3.8612	0.0785127	5.95556	5.95556	5.95556	5.5526	5.5526	5.5526	5.5526	5.5526
Adamts10	-0.116525	6.34246	0.478069	0.50542	6.26765	6.26765	6.26765	6.38417	6.38417	6.38417	6.38417	6.38417
Adamts12	0.276541	3.30365	0.923357	0.359808	3.46261	3.46261	3.46261	3.18607	3.18607	3.18607	3.18607	3.18607
Adamts14	-0.00918179	1.03345	0.000469137	0.983156	0.983649	0.983649	0.983649	0.992831	0.992831	0.992831	0.992831	0.992831
Adamts15	0.0348291	2.36743	0.0115471	0.916604	2.37284	2.37284	2.37284	2.33801	2.33801	2.33801	2.33801	2.33801
Adamts16	0.119564	3.68862	0.346492	0.569483	3.75585	3.75585	3.75585	3.63629	3.63629	3.63629	3.63629	3.63629
Adamts17	-0.0473542	3.40345	0.072859	0.792843	3.36589	3.36589	3.36589	3.41324	3.41324	3.41324	3.41324	3.41324
Adamts18	-0.669844	-0.328174	2.97085	0.116261	-0.904125	-0.904125	-0.904125	-0.234281	-0.234281	-0.234281	-0.234281	-0.234281
Adamts19	1.46004	1.22287	14.2722	0.00377743	1.92674	1.92674	1.92674	0.466697	0.466697	0.466697	0.466697	0.466697
Adamts2	0.328171	3.4648	1.36511	0.270415	3.65404	3.65404	3.65404	3.32587	3.32587	3.32587	3.32587	3.32587
Adamts20	0.185945	3.99711	1.21082	0.297582	4.10549	4.10549	4.10549	3.91955	3.91955	3.91955	3.91955	3.91955
Adamts3	0.541828	3.55345	7.52601	0.0211621	3.86136	3.86136	3.86136	3.31953	3.31953	3.31953	3.31953	3.31953
Adamts4	-0.395456	6.97745	1.06895	0.326134	6.71693	6.71693	6.71693	7.11238	7.11238	7.11238	7.11238	7.11238
Adamts5	0.0365776	4.13699	0.119602	0.736808	4.15507	4.15507	4.15507	4.11849	4.11849	4.11849	4.11849	4.11849
Adamts6	0.0262937	4.91993	0.0249879	0.877622	4.93355	4.93355	4.93355	4.90725	4.90725	4.90725	4.90725	4.90725
Adamts7	-0.0702028	3.97014	0.372621	0.555533	3.92048	3.92048	3.92048	3.99068	3.99068	3.99068	3.99068	3.99068
Adamts8	0.391356	2.41879	3.25941	0.101916	2.63592	2.63592	2.63592	2.24456	2.24456	2.24456	2.24456	2.24456
Adamts9	-0.0429725	5.43013	0.230701	0.641593	5.40129	5.40129	5.40129	5.44426	5.44426	5.44426	5.44426	5.44426
Adamtsl1	0.537552	3.03735	7.89568	0.0189018	3.34022	3.34022	3.34022	2.80267	2.80267	2.80267	2.80267	2.80267
Adamtsl2	0.314521	2.99526	1.27269	0.286244	3.1744	3.1744	3.1744	2.85988	2.85988	2.85988	2.85988	2.85988
Adamtsl3	0.446684	5.66776	28.0205	0.00038113	5.92896	5.92896	5.92896	5.48227	5.48227	5.48227	5.48227	5.48227
Adamtsl4	0.286011	1.63647	0.919457	0.36078	1.78338	1.78338	1.78338	1.49737	1.49737	1.49737	1.49737	1.49737
Adamtsl5	0.495939	0.471585	1.50998	0.247961	0.702041	0.702041	0.702041	0.206102	0.206102	0.206102	0.206102	0.206102
Adap1	-0.188758	4.33432	1.574	0.238854	4.20923	4.20923	4.20923	4.39799	4.39799	4.39799	4.39799	4.39799
Adap2	0.679238	4.89635	9.15448	0.0131219	5.28014	5.28014	5.28014	4.6009	4.6009	4.6009	4.6009	4.6009
Adar	0.0366278	6.49025	0.161634	0.696324	6.51217	6.51217	6.51217	6.47554	6.47554	6.47554	6.47554	6.47554
Adarb1	-0.0533857	5.10791	0.419568	0.5321	5.07189	5.07189	5.07189	5.12527	5.12527	5.12527	5.12527	5.12527
Adarb2	-0.0444374	4.36499	0.0624563	0.807839	4.33299	4.33299	4.33299	4.37743	4.37743	4.37743	4.37743	4.37743
Adat1	-0.0112496	3.08964	0.0101106	0.921943	3.07293	3.07293	3.07293	3.08418	3.08418	3.08418	3.08418	3.08418
Adat2	-0.050859	2.77918	0.108665	0.748638	2.73464	2.73464	2.73464	2.7855	2.7855	2.7855	2.7855	2.7855
Adck1	-0.204399	4.86074	5.04677	0.0491042	4.72669	4.72669	4.72669	4.93109	4.93109	4.93109	4.93109	4.93109
Adck2	-0.0770359	4.40574	0.743725	0.409171	4.35315	4.35315	4.35315	4.43018	4.43018	4.43018	4.43018	4.43018
Adck5	-0.147652	3.85864	0.951146	0.352992	3.75863	3.75863	3.75863	3.90628	3.90628	3.90628	3.90628	3.90628
Adcy1	-0.248802	6.13428	4.8842	0.0522092	5.97262	5.97262	5.97262	6.22142	6.22142	6.22142	6.22142	6.22142
Adcy2	-0.336938	5.96422	4.84963	0.0529005	5.7433	5.7433	5.7433	6.08024	6.08024	6.08024	6.08024	6.08024
Adcy3	-0.00977989	6.11788	0.0160169	0.901861	6.11067	6.11067	6.11067	6.12045	6.12045	6.12045	6.12045	6.12045
Adcy4	0.46163	3.55047	2.41554	0.151951	3.81538	3.81538	3.81538	3.35375	3.35375	3.35375	3.35375	3.35375
Adcy5	-0.155718	6.63478	6.1571	0.0330171	6.53464	6.53464	6.53464	6.69036	6.69036	6.69036	6.69036	6.69036
Adcy6	-0.140651	6.55039	1.65535	0.227926	6.45993	6.45993	6.45993	6.60058	6.60058	6.60058	6.60058	6.60058
Adcy7	0.658447	5.75584	7.96172	0.0185296	6.13043	6.13043	6.13043	5.47198	5.47198	5.47198	5.47198	5.47198
Adcy8	-0.390817	4.73572	3.06634	0.111246	4.47606	4.47606	4.47606	4.86687	4.86687	4.86687	4.86687	4.86687
Adcy9	-0.0616342	4.43361	0.326665	0.580559	4.3909	4.3909	4.3909	4.45254	4.45254	4.45254	4.45254	4.45254
Adcyap1r1	-0.305337	8.99216	12.2969	0.00587997	8.79372	8.79372	8.79372	9.09905	9.09905	9.09905	9.09905	9.09905
Add1	-0.174572	8.8678	3.1758	0.10583	8.75604	8.75604	8.75604	8.93061	8.93061	8.93061	8.93061	8.93061
Add2	0.115229	6.18583	1.61967	0.232634	6.25571	6.25571	6.25571	6.14048	6.14048	6.14048	6.14048	6.14048
Add3	-0.0258134	7.6176	0.144742	0.711764	7.60097	7.60097	7.60097	7.62678	7.62678	7.62678	7.62678	7.62678
Adgb	-0.00660804	2.93373	0.0005151	0.98235	2.91907	2.91907	2.91907	2.92568	2.92568	2.92568	2.92568	2.92568
Adgra1	-0.0164825	4.57825	0.0179866	0.896039	4.5645	4.5645	4.5645	4.58099	4.58099	4.58099	4.58099	4.58099
Adgra2	0.437908	5.77011	5.781	0.037617	6.02659	6.02659	6.02659	5.58868	5.58868	5.58868	5.58868	5.58868
Adgra3	-0.0454089	6.31265	0.506672	0.493254	6.28308	6.28308	6.28308	6.32849	6.32849	6.32849	6.32849	6.32849
Adgrb1	-0.141737	9.09048	2.22291	0.167587	9.00012	9.00012	9.00012	9.14185	9.14185	9.14185	9.14185	9.14185
Adgrb2	-0.0463688	8.55342	0.308094	0.591352	8.52405	8.52405	8.52405	8.57042	8.57042	8.57042	8.57042	8.57042
Adgrb3	-0.0281732	6.45337	0.132099	0.724019	6.43469	6.43469	6.43469	6.46286	6.46286	6.46286	6.46286	6.46286
Adgrd1	-0.0303145	-0.788653	0.00546645	0.942556	-0.967405	-0.967405	-0.967405	-0.93709	-0.93709	-0.93709	-0.93709	-0.93709
Adgre1	0.686776	6.9105	8.49827	0.0158144	7.30001	7.30001	7.30001	6.61323	6.61323	6.61323	6.61323	6.61323
Adgre5	0.508276	4.69858	6.6468	0.028016	4.99203	4.99203	4.99203	4.48375	4.48375	4.48375	4.48375	4.48375
Adgrf5	0.40243	6.22233	2.62279	0.137175	6.45938	6.45938	6.45938	6.05695	6.05695	6.05695	6.05695	6.05695
Adgrg1	0.0719592	8.78742	0.761838	0.403728	8.83179	8.83179	8.83179	8.75983	8.75983	8.75983	8.75983	8.75983
Adgrg2	-0.240615	1.40344	1.42608	0.260635	1.21533	1.21533	1.21533	1.45594	1.45594	1.45594	1.45594	1.45594
Adgrg3	0.17751	-0.362961	0.260908	0.620856	-0.359181	-0.359181	-0.359181	-0.536691	-0.536691	-0.536691	-0.536691	-0.536691
Adgrg5	0.835714	1.62433	2.62984	0.136706	2.05971	2.05971	2.05971	1.224	1.224	1.224	1.224	1.224
Adgrg6	0.600101	3.10633	6.03316	0.0344526	3.44346	3.44346	3.44346	2.84336	2.84336	2.84336	2.84336	2.84336
Adgrl1	-0.138759	8.88044	1.83488	0.206094	8.79198	8.79198	8.79198	8.93074	8.93074	8.93074	8.93074	8.93074
Adgrl2	0.335125	5.47159	6.60313	0.0284224	5.67006	5.67006	5.67006	5.33494	5.33494	5.33494	5.33494	5.33494
Adgrl3	-0.111227	8.05149	1.8522	0.204138	7.98065	7.98065	7.98065	8.09187	8.09187	8.09187	8.09187	8.09187
Adgrl4	0.533306	5.12439	3.9717	0.0749769	5.43201	5.43201	5.43201	4.89871	4.89871	4.89871	4.89871	4.89871
Adgrv1	0.119433	4.29262	1.48494	0.251653	4.36198	4.36198	4.36198	4.24255	4.24255	4.24255	4.24255	4.24255
Adh1	0.84112	1.28104	4.29616	0.065682	1.72177	1.72177	1.72177	0.880654	0.880654	0.880654	0.880654	0.880654
Adh5	-0.133362	6.62617	2.72719	0.13043	6.54055	6.54055	6.54055	6.67392	6.67392	6.67392	6.67392	6.67392
Adhfe1	-0.262799	4.77091	3.48923	0.0920605	4.59783	4.59783	4.59783	4.86063	4.86063	4.86063	4.86063	4.86063
Adi1	-0.0736134	5.36488	0.316178	0.586601	5.31627	5.31627	5.31627	5.38988	5.38988	5.38988	5.38988	5.38988
Adipor1	-0.0398972	6.83835	0.146057	0.710526	6.81263	6.81263	6.81263	6.85253	6.85253	6.85253	6.85253	6.85253
Adipor2	-0.0303485	6.73818	0.195559	0.667972	6.71833	6.71833	6.71833	6.74868	6.74868	6.74868	6.74868	6.74868
Adk	-0.232966	5.67372	7.51922	0.0212066	5.52216	5.52216	5.52216	5.75513	5.75513	5.75513	5.75513	5.75513
Adm	0.643049	1.81571	5.06584	0.0487552	2.16107	2.16107	2.16107	1.51802	1.51802	1.51802	1.51802	1.51802
Adnp	0.401155	3.10091	2.74215	0.129498	3.3296	3.3296	3.3296	2.92845	2.92845	2.92845	2.92845	2.92845
Adnp2	-0.00662764	4.88521	0.00479165	0.946212	4.87832	4.87832	4.87832	4.88495	4.88495	4.88495	4.88495	4.88495
Ado	-0.216573	6.99643	1.40869	0.263373	6.85648	6.85648	6.85648	7.07306	7.07306	7.07306	7.07306	7.07306
Adora1	0.128078	7.71467	0.917748	0.361208	7.79301	7.79301	7.79301	7.66493	7.66493	7.66493	7.66493	7.66493
Adora2a	0.165099	2.36817	0.312128	0.588971	2.45307	2.45307	2.45307	2.28797	2.28797	2.28797	2.28797	2.28797
Adora2b	-0.197299	4.7233	4.92079	0.0514897	4.59355	4.59355	4.59355	4.79085	4.79085	4.79085	4.79085	4.79085
Adora3	0.929747	1.88298	12.4347	0.00569329	2.37214	2.37214	2.37214	1.44239	1.44239	1.44239	1.44239	1.44239
Adpgk	-0.0563903	5.30241	0.131182	0.724933	5.26459	5.26459	5.26459	5.32098	5.32098	5.32098	5.32098	5.32098
Adprh	-0.0578536	6.50176	0.697158	0.423718	6.46442	6.46442	6.46442	6.52228	6.52228	6.52228	6.52228	6.52228
Adprhl2	-0.0491689	4.94858	0.241181	0.634215	4.91507	4.91507	4.91507	4.96424	4.96424	4.96424	4.96424	4.96424
Adprm	-0.0216625	3.49398	0.0282936	0.869857	3.47286	3.47286	3.47286	3.49453	3.49453	3.49453	3.49453	3.49453
Adra1a	-0.784217	2.77619	13.9087	0.00408547	2.22519	2.22519	2.22519	3.00941	3.00941	3.00941	3.00941	3.00941
Adra1b	0.198347	2.92157	1.631	0.231125	3.03149	3.03149	3.03149	2.83314	2.83314	2.83314	2.83314	2.83314
Adra1d	0.0553423	-1.6292	0.00792049	0.930885	-1.87005	-1.87005	-1.87005	-1.9254	-1.9254	-1.9254	-1.9254	-1.9254
Adra2a	-0.0626875	4.07827	0.116158	0.740465	4.03375	4.03375	4.03375	4.09644	4.09644	4.09644	4.09644	4.09644
Adra2c	-0.883416	0.861721	7.00476	0.0249389	0.193231	0.193231	0.193231	1.07665	1.07665	1.07665	1.07665	1.07665
Adrb1	0.00590093	2.72819	0.00138064	0.971109	2.71889	2.71889	2.71889	2.71299	2.71299	2.71299	2.71299	2.71299
Adrb2	0.533055	4.40508	3.23154	0.1032	4.71164	4.71164	4.71164	4.17859	4.17859	4.17859	4.17859	4.17859
Adrb3	0.699807	-1.46998	1.15957	0.307465	-1.31603	-1.31603	-1.31603	-2.01584	-2.01584	-2.01584	-2.01584	-2.01584
Adrm1	-0.0394079	5.89028	0.253677	0.625676	5.86418	5.86418	5.86418	5.90359	5.90359	5.90359	5.90359	5.90359
Adsl	-0.0483114	5.18053	0.314775	0.58742	5.14793	5.14793	5.14793	5.19624	5.19624	5.19624	5.19624	5.19624
Adss	0.0280135	5.3231	0.0865487	0.774776	5.33835	5.33835	5.33835	5.31034	5.31034	5.31034	5.31034	5.31034
Adssl1	0.282216	2.82359	0.725771	0.414683	2.98355	2.98355	2.98355	2.70133	2.70133	2.70133	2.70133	2.70133
Aebp1	0.545605	5.11873	12.3366	0.00582534	5.43306	5.43306	5.43306	4.88746	4.88746	4.88746	4.88746	4.88746
Aebp2	0.0967869	6.05764	2.26383	0.164096	6.1161	6.1161	6.1161	6.01932	6.01932	6.01932	6.01932	6.01932
Aen	0.631755	4.80546	43.6187	6.7927e-05	5.16441	5.16441	5.16441	4.53266	4.53266	4.53266	4.53266	4.53266
Afap1	-0.161877	5.65583	4.26988	0.0663792	5.55069	5.55069	5.55069	5.71256	5.71256	5.71256	5.71256	5.71256
Afap1l1	0.291547	5.57084	3.28957	0.100549	5.74435	5.74435	5.74435	5.45281	5.45281	5.45281	5.45281	5.45281
Afap1l2	-0.103639	7.91345	1.50512	0.248672	7.84742	7.84742	7.84742	7.95105	7.95105	7.95105	7.95105	7.95105
Afdn	0.230546	6.29362	7.9878	0.0183851	6.43227	6.43227	6.43227	6.20173	6.20173	6.20173	6.20173	6.20173
Aff1	0.305628	5.29903	6.06412	0.0340869	5.48052	5.48052	5.48052	5.1749	5.1749	5.1749	5.1749	5.1749
Aff2	0.0212571	3.77987	0.0314241	0.862924	3.78712	3.78712	3.78712	3.76587	3.76587	3.76587	3.76587	3.76587
Aff3	-0.142518	4.38311	1.26881	0.286938	4.28831	4.28831	4.28831	4.43083	4.43083	4.43083	4.43083	4.43083
Aff4	-0.0101766	8.31472	0.0151453	0.904553	8.30806	8.30806	8.30806	8.31824	8.31824	8.31824	8.31824	8.31824
Afg1l	-0.0700888	4.42044	0.447909	0.518855	4.37226	4.37226	4.37226	4.44235	4.44235	4.44235	4.44235	4.44235
Afg3l1	-0.00277263	5.86689	0.00151447	0.969742	5.86384	5.86384	5.86384	5.86661	5.86661	5.86661	5.86661	5.86661
Afg3l2	-0.0420153	5.76742	0.278047	0.609767	5.73943	5.73943	5.73943	5.78145	5.78145	5.78145	5.78145	5.78145
Afmid	-0.230033	0.854403	0.41773	0.532982	0.661871	0.661871	0.661871	0.891904	0.891904	0.891904	0.891904	0.891904
Aftph	0.232702	5.98928	12.7912	0.00524293	6.12902	6.12902	6.12902	5.89632	5.89632	5.89632	5.89632	5.89632
Aga	0.0920281	3.72026	0.4514	0.517266	3.77088	3.77088	3.77088	3.67885	3.67885	3.67885	3.67885	3.67885
Agap1	0.238082	7.97526	6.24958	0.0319936	8.11909	8.11909	8.11909	7.88101	7.88101	7.88101	7.88101	7.88101
Agap2	-0.13419	8.31008	1.35525	0.272045	8.2245	8.2245	8.2245	8.35869	8.35869	8.35869	8.35869	8.35869
Agap3	-0.121589	6.70105	2.70392	0.131895	6.62307	6.62307	6.62307	6.74466	6.74466	6.74466	6.74466	6.74466
Agbl1	0.0282268	-1.74911	0.00193082	0.965838	-2.05253	-2.05253	-2.05253	-2.08076	-2.08076	-2.08076	-2.08076	-2.08076
Agbl2	-0.0361557	0.393363	0.00782402	0.931306	0.305943	0.305943	0.305943	0.342099	0.342099	0.342099	0.342099	0.342099
Agbl3	-0.158577	3.78331	1.31371	0.279062	3.67596	3.67596	3.67596	3.83454	3.83454	3.83454	3.83454	3.83454
Agbl4	-0.0203323	0.624674	0.00381662	0.951986	0.563834	0.563834	0.563834	0.584167	0.584167	0.584167	0.584167	0.584167
Agbl5	-0.00914325	5.11076	0.0103162	0.921156	5.10267	5.10267	5.10267	5.11182	5.11182	5.11182	5.11182	5.11182
Ager	0.33688	1.43551	1.63689	0.230346	1.60901	1.60901	1.60901	1.27213	1.27213	1.27213	1.27213	1.27213
Agfg1	0.0019671	7.4877	0.000925253	0.976347	7.48845	7.48845	7.48845	7.48649	7.48649	7.48649	7.48649	7.48649
Agfg2	0.0910024	4.59548	1.00413	0.340521	4.64832	4.64832	4.64832	4.55732	4.55732	4.55732	4.55732	4.55732
Aggf1	-0.0315563	5.87607	0.235075	0.638489	5.85489	5.85489	5.85489	5.88644	5.88644	5.88644	5.88644	5.88644
Agk	-0.00518167	4.43427	0.00310044	0.956719	4.42716	4.42716	4.42716	4.43235	4.43235	4.43235	4.43235	4.43235
Agl	-0.131225	6.74688	3.55617	0.0894174	6.66267	6.66267	6.66267	6.79389	6.79389	6.79389	6.79389	6.79389
Agmo	0.249944	3.80369	3.29497	0.100307	3.94922	3.94922	3.94922	3.69927	3.69927	3.69927	3.69927	3.69927
Ago1	-0.0419396	7.72887	0.347102	0.56915	7.70211	7.70211	7.70211	7.74405	7.74405	7.74405	7.74405	7.74405
Ago2	0.0292981	6.89638	0.123996	0.732229	6.9139	6.9139	6.9139	6.8846	6.8846	6.8846	6.8846	6.8846
Ago3	-0.281397	7.12026	1.23078	0.293855	6.93719	6.93719	6.93719	7.21858	7.21858	7.21858	7.21858	7.21858
Ago4	-0.0373004	5.27594	0.176929	0.683142	5.25032	5.25032	5.25032	5.28762	5.28762	5.28762	5.28762	5.28762
Agpat1	-0.0993968	6.80481	1.7457	0.216569	6.74111	6.74111	6.74111	6.84051	6.84051	6.84051	6.84051	6.84051
Agpat2	0.00532613	1.9801	0.00076306	0.978519	1.9609	1.9609	1.9609	1.95557	1.95557	1.95557	1.95557	1.95557
Agpat3	-0.207992	8.82381	6.89354	0.0258486	8.69015	8.69015	8.69015	8.89815	8.89815	8.89815	8.89815	8.89815
Agpat4	-0.298513	5.97971	1.64687	0.229033	5.78426	5.78426	5.78426	6.08277	6.08277	6.08277	6.08277	6.08277
Agpat5	-0.142045	6.89716	3.54801	0.0897347	6.806	6.806	6.806	6.94804	6.94804	6.94804	6.94804	6.94804
Agps	0.086997	6.64328	0.633482	0.445017	6.69611	6.69611	6.69611	6.60911	6.60911	6.60911	6.60911	6.60911
Agr3	1.5541	-0.881146	7.25574	0.0230257	-0.260586	-0.260586	-0.260586	-1.81468	-1.81468	-1.81468	-1.81468	-1.81468
Agrn	-0.122635	9.39491	1.12718	0.313956	9.31693	9.31693	9.31693	9.43957	9.43957	9.43957	9.43957	9.43957
Agt	-0.857062	6.01504	13.3798	0.00458987	5.4219	5.4219	5.4219	6.27897	6.27897	6.27897	6.27897	6.27897
Agtpbp1	-0.0342013	5.66996	0.13	0.726117	5.64672	5.64672	5.64672	5.68092	5.68092	5.68092	5.68092	5.68092
Agtr1a	-0.202481	0.580494	0.202955	0.662193	0.385744	0.385744	0.385744	0.588225	0.588225	0.588225	0.588225	0.588225
Agtr2	0.327927	-0.745253	0.230485	0.641748	-0.686341	-0.686341	-0.686341	-1.01427	-1.01427	-1.01427	-1.01427	-1.01427
Agtrap	0.0773255	4.06896	0.217166	0.651439	4.11196	4.11196	4.11196	4.03464	4.03464	4.03464	4.03464	4.03464
Ahctf1	0.182686	6.11965	3.70102	0.0840175	6.22977	6.22977	6.22977	6.04708	6.04708	6.04708	6.04708	6.04708
Ahcy	-0.0516976	3.66074	0.158904	0.698753	3.62141	3.62141	3.62141	3.67311	3.67311	3.67311	3.67311	3.67311
Ahcyl1	-0.244696	8.47393	9.84293	0.0108726	8.31595	8.31595	8.31595	8.56064	8.56064	8.56064	8.56064	8.56064
Ahcyl2	0.219387	6.56943	9.60903	0.01158	6.70174	6.70174	6.70174	6.48235	6.48235	6.48235	6.48235	6.48235
Ahdc1	0.103082	5.85686	1.5047	0.248733	5.91911	5.91911	5.91911	5.81603	5.81603	5.81603	5.81603	5.81603
Ahi1	-0.0495021	6.57935	0.473386	0.507464	6.54732	6.54732	6.54732	6.59682	6.59682	6.59682	6.59682	6.59682
Ahnak	0.414458	5.99065	2.58615	0.139648	6.23411	6.23411	6.23411	5.81965	5.81965	5.81965	5.81965	5.81965
Ahr	0.360102	3.02298	2.08866	0.179744	3.22776	3.22776	3.22776	2.86766	2.86766	2.86766	2.86766	2.86766
Ahrr	-0.0796251	1.75336	0.177218	0.682899	1.67767	1.67767	1.67767	1.75729	1.75729	1.75729	1.75729	1.75729
Ahsa1	-0.0327408	6.20885	0.203747	0.661582	6.18718	6.18718	6.18718	6.21992	6.21992	6.21992	6.21992	6.21992
Ahsa2	-0.222778	5.44343	3.88176	0.0778393	5.29798	5.29798	5.29798	5.52076	5.52076	5.52076	5.52076	5.52076
AI182371	0.145878	-0.343772	0.112634	0.744271	-0.355823	-0.355823	-0.355823	-0.501701	-0.501701	-0.501701	-0.501701	-0.501701
AI197445	-0.0475978	-0.233546	0.0237811	0.880587	-0.36962	-0.36962	-0.36962	-0.322022	-0.322022	-0.322022	-0.322022	-0.322022
AI413582	-0.29436	3.45737	4.30385	0.0654796	3.2582	3.2582	3.2582	3.55256	3.55256	3.55256	3.55256	3.55256
AI427809	0.560503	-0.264465	1.13886	0.311593	-0.04622	-0.04622	-0.04622	-0.606723	-0.606723	-0.606723	-0.606723	-0.606723
AI429214	-0.0927317	1.8794	0.133604	0.722526	1.79858	1.79858	1.79858	1.89132	1.89132	1.89132	1.89132	1.89132
AI467606	0.685609	2.38318	7.17372	0.0236306	2.75879	2.75879	2.75879	2.07318	2.07318	2.07318	2.07318	2.07318
AI504432	0.194217	4.63861	2.63002	0.136693	4.75371	4.75371	4.75371	4.55949	4.55949	4.55949	4.55949	4.55949
AI506816	0.426408	6.56624	8.31824	0.0166678	6.81704	6.81704	6.81704	6.39064	6.39064	6.39064	6.39064	6.39064
AI593442	-0.399602	3.46334	6.02138	0.0345929	3.19272	3.19272	3.19272	3.59232	3.59232	3.59232	3.59232	3.59232
AI597479	-0.211434	4.69967	4.39677	0.0630947	4.56053	4.56053	4.56053	4.77196	4.77196	4.77196	4.77196	4.77196
AI661453	0.399445	0.128595	1.18528	0.302448	0.295178	0.295178	0.295178	-0.104266	-0.104266	-0.104266	-0.104266	-0.104266
AI662270	0.733895	0.1607	5.74212	0.0381363	0.50509	0.50509	0.50509	-0.228805	-0.228805	-0.228805	-0.228805	-0.228805
AI837181	-0.134123	5.10517	1.80314	0.209743	5.01751	5.01751	5.01751	5.15163	5.15163	5.15163	5.15163	5.15163
AI854703	-0.184684	3.29866	1.54442	0.243004	3.17165	3.17165	3.17165	3.35633	3.35633	3.35633	3.35633	3.35633
AI987944	-0.156015	3.94043	1.39893	0.264928	3.83539	3.83539	3.83539	3.99141	3.99141	3.99141	3.99141	3.99141
Aida	0.044204	5.42169	0.449623	0.518074	5.44726	5.44726	5.44726	5.40306	5.40306	5.40306	5.40306	5.40306
Aif1	0.468808	4.27042	2.93201	0.118384	4.54169	4.54169	4.54169	4.07288	4.07288	4.07288	4.07288	4.07288
Aif1l	0.0999058	5.64989	0.629295	0.44648	5.71003	5.71003	5.71003	5.61012	5.61012	5.61012	5.61012	5.61012
Aifm1	-0.0933791	5.19045	0.572713	0.467067	5.12896	5.12896	5.12896	5.22234	5.22234	5.22234	5.22234	5.22234
Aifm2	-0.238645	2.57128	1.78217	0.212201	2.4018	2.4018	2.4018	2.64045	2.64045	2.64045	2.64045	2.64045
Aifm3	-0.359999	4.75324	9.48708	0.011971	4.51461	4.51461	4.51461	4.87461	4.87461	4.87461	4.87461	4.87461
Aig1	-0.175917	4.97097	3.80561	0.0803704	4.8557	4.8557	4.8557	5.03161	5.03161	5.03161	5.03161	5.03161
Aim2	0.573039	3.27378	3.66116	0.0854615	3.59679	3.59679	3.59679	3.02375	3.02375	3.02375	3.02375	3.02375
Aimp1	-0.0986311	5.04396	0.698477	0.423294	4.9791	4.9791	4.9791	5.07773	5.07773	5.07773	5.07773	5.07773
Aimp2	-0.176119	4.30604	1.98106	0.190337	4.18912	4.18912	4.18912	4.36524	4.36524	4.36524	4.36524	4.36524
Aip	-0.107422	5.1268	1.07001	0.325906	5.05646	5.05646	5.05646	5.16389	5.16389	5.16389	5.16389	5.16389
Aire	-0.551499	-1.37577	1.20867	0.297987	-1.99035	-1.99035	-1.99035	-1.43885	-1.43885	-1.43885	-1.43885	-1.43885
Airn	-0.126455	1.66303	0.416645	0.533504	1.55553	1.55553	1.55553	1.68199	1.68199	1.68199	1.68199	1.68199
Ajap1	-0.445486	3.52174	8.79666	0.0145141	3.21966	3.21966	3.21966	3.66515	3.66515	3.66515	3.66515	3.66515
Ajm1	-0.498224	4.82802	8.17254	0.0173998	4.49392	4.49392	4.49392	4.99215	4.99215	4.99215	4.99215	4.99215
Ajuba	0.530831	3.19725	4.5952	0.0583526	3.49764	3.49764	3.49764	2.96681	2.96681	2.96681	2.96681	2.96681
Ak1	-0.270664	4.95289	3.11784	0.108655	4.77505	4.77505	4.77505	5.04571	5.04571	5.04571	5.04571	5.04571
Ak2	0.0445043	5.63749	0.444685	0.52033	5.66358	5.66358	5.66358	5.61908	5.61908	5.61908	5.61908	5.61908
Ak3	-0.247347	6.72403	7.48207	0.0214523	6.56364	6.56364	6.56364	6.81099	6.81099	6.81099	6.81099	6.81099
Ak4	-0.109008	4.69644	0.705743	0.420973	4.62407	4.62407	4.62407	4.73308	4.73308	4.73308	4.73308	4.73308
Ak5	0.0870567	4.27155	0.443433	0.520905	4.32117	4.32117	4.32117	4.23412	4.23412	4.23412	4.23412	4.23412
Ak6	-0.0767229	3.01514	0.338515	0.573886	2.95669	2.95669	2.95669	3.03341	3.03341	3.03341	3.03341	3.03341
Ak7	-0.782721	0.804451	2.53719	0.143042	0.207562	0.207562	0.207562	0.990283	0.990283	0.990283	0.990283	0.990283
Ak8	-0.0335063	-0.614166	0.00534515	0.943195	-0.765553	-0.765553	-0.765553	-0.732047	-0.732047	-0.732047	-0.732047	-0.732047
Ak9	0.0153559	-0.534899	0.000920292	0.976411	-0.663261	-0.663261	-0.663261	-0.678617	-0.678617	-0.678617	-0.678617	-0.678617
Akap1	-0.115337	5.70831	2.59507	0.139041	5.63345	5.63345	5.63345	5.74879	5.74879	5.74879	5.74879	5.74879
Akap10	0.0289354	5.30653	0.0938109	0.765824	5.32233	5.32233	5.32233	5.2934	5.2934	5.2934	5.2934	5.2934
Akap11	-0.119444	7.27797	1.21006	0.297725	7.20152	7.20152	7.20152	7.32096	7.32096	7.32096	7.32096	7.32096
Akap12	0.583928	6.20329	24.4421	0.000628446	6.53893	6.53893	6.53893	5.955	5.955	5.955	5.955	5.955
Akap13	0.322382	7.09994	11.5846	0.00697154	7.29232	7.29232	7.29232	6.96994	6.96994	6.96994	6.96994	6.96994
Akap17b	-0.0172251	3.85446	0.0166733	0.899882	3.83788	3.83788	3.83788	3.85511	3.85511	3.85511	3.85511	3.85511
Akap5	-0.117266	3.81209	0.851124	0.378488	3.73154	3.73154	3.73154	3.8488	3.8488	3.8488	3.8488	3.8488
Akap6	-0.396478	6.29659	2.39898	0.153219	6.03532	6.03532	6.03532	6.4318	6.4318	6.4318	6.4318	6.4318
Akap7	-0.0627271	5.15879	0.414848	0.534369	5.11698	5.11698	5.11698	5.17971	5.17971	5.17971	5.17971	5.17971
Akap8	0.0470398	6.79444	0.149319	0.707482	6.82287	6.82287	6.82287	6.77584	6.77584	6.77584	6.77584	6.77584
Akap8l	-0.15844	6.83852	1.01739	0.337503	6.7367	6.7367	6.7367	6.89514	6.89514	6.89514	6.89514	6.89514
Akap9	0.046429	7.05587	0.104701	0.75309	7.08395	7.08395	7.08395	7.03752	7.03752	7.03752	7.03752	7.03752
Akip1	0.230607	2.52252	2.67994	0.133428	2.64849	2.64849	2.64849	2.41788	2.41788	2.41788	2.41788	2.41788
Akirin1	-0.0896072	6.45081	1.48371	0.251837	6.39319	6.39319	6.39319	6.4828	6.4828	6.4828	6.4828	6.4828
Akirin2	0.0828801	5.80064	1.58611	0.237182	5.85039	5.85039	5.85039	5.76751	5.76751	5.76751	5.76751	5.76751
Akna	0.543358	5.54301	16.1521	0.00256766	5.85677	5.85677	5.85677	5.31341	5.31341	5.31341	5.31341	5.31341
Akr1a1	-0.0810786	8.14951	0.365634	0.559195	8.09805	8.09805	8.09805	8.17913	8.17913	8.17913	8.17913	8.17913
Akr1b10	0.162673	4.6195	1.78228	0.212188	4.71582	4.71582	4.71582	4.55315	4.55315	4.55315	4.55315	4.55315
Akr1b3	0.177366	4.98778	1.5011	0.249262	5.09367	5.09367	5.09367	4.9163	4.9163	4.9163	4.9163	4.9163
Akr1b8	-0.613159	-0.754148	0.853287	0.377907	-1.33778	-1.33778	-1.33778	-0.724624	-0.724624	-0.724624	-0.724624	-0.724624
Akr1c13	-0.017009	0.0897029	0.00288533	0.958246	-0.00735764	-0.00735764	-0.00735764	0.00965136	0.00965136	0.00965136	0.00965136	0.00965136
Akr1c14	0.206611	1.31654	0.323551	0.58234	1.40975	1.40975	1.40975	1.20314	1.20314	1.20314	1.20314	1.20314
Akr1e1	-0.214222	4.77504	0.402794	0.540248	4.63454	4.63454	4.63454	4.84876	4.84876	4.84876	4.84876	4.84876
Akr7a5	-0.219717	4.57872	3.50006	0.0916262	4.4339	4.4339	4.4339	4.65362	4.65362	4.65362	4.65362	4.65362
Akt1	0.0554551	7.63195	0.45202	0.516985	7.66599	7.66599	7.66599	7.61053	7.61053	7.61053	7.61053	7.61053
Akt1s1	-0.241129	6.00591	7.42145	0.0218605	5.84934	5.84934	5.84934	6.09047	6.09047	6.09047	6.09047	6.09047
Akt2	-0.0777921	7.42894	1.24235	0.291726	7.37935	7.37935	7.37935	7.45714	7.45714	7.45714	7.45714	7.45714
Akt3	-0.119403	6.46748	2.34357	0.157562	6.39069	6.39069	6.39069	6.5101	6.5101	6.5101	6.5101	6.5101
Aktip	-0.249421	5.83492	6.13657	0.0332498	5.67253	5.67253	5.67253	5.92196	5.92196	5.92196	5.92196	5.92196
Alad	-0.238603	4.98511	3.86862	0.078269	4.82861	4.82861	4.82861	5.06721	5.06721	5.06721	5.06721	5.06721
Alas1	0.0649624	5.51265	0.398074	0.542585	5.55119	5.55119	5.55119	5.48623	5.48623	5.48623	5.48623	5.48623
Alas2	0.215729	4.62504	0.685472	0.4275	4.75277	4.75277	4.75277	4.53704	4.53704	4.53704	4.53704	4.53704
Alcam	0.0456255	7.83689	0.228565	0.643123	7.86483	7.86483	7.86483	7.8192	7.8192	7.8192	7.8192	7.8192
Aldh16a1	0.127505	4.33503	1.39343	0.265811	4.40948	4.40948	4.40948	4.28197	4.28197	4.28197	4.28197	4.28197
Aldh18a1	-0.120167	6.12093	2.69321	0.132577	6.0435	6.0435	6.0435	6.16367	6.16367	6.16367	6.16367	6.16367
Aldh1a1	-0.231371	3.84475	0.482668	0.503427	3.68944	3.68944	3.68944	3.92081	3.92081	3.92081	3.92081	3.92081
Aldh1a2	0.519004	2.69068	1.41029	0.26312	2.98196	2.98196	2.98196	2.46296	2.46296	2.46296	2.46296	2.46296
Aldh1a7	1.30115	0.79401	14.7547	0.00341076	1.43535	1.43535	1.43535	0.134202	0.134202	0.134202	0.134202	0.134202
Aldh1b1	-0.152025	2.47416	1.07731	0.324342	2.36251	2.36251	2.36251	2.51453	2.51453	2.51453	2.51453	2.51453
Aldh1l1	-0.54596	6.67308	29.9921	0.000295359	6.30763	6.30763	6.30763	6.85359	6.85359	6.85359	6.85359	6.85359
Aldh1l2	0.0273195	6.30436	0.0942573	0.765287	6.3203	6.3203	6.3203	6.29298	6.29298	6.29298	6.29298	6.29298
Aldh2	-0.0104786	6.57597	0.00755661	0.932487	6.56868	6.56868	6.56868	6.57915	6.57915	6.57915	6.57915	6.57915
Aldh3a2	-0.0877954	6.43109	2.07739	0.180816	6.37457	6.37457	6.37457	6.46237	6.46237	6.46237	6.46237	6.46237
Aldh3b1	0.0409296	3.66283	0.118423	0.738054	3.68181	3.68181	3.68181	3.64088	3.64088	3.64088	3.64088	3.64088
Aldh4a1	-0.00274432	4.92853	0.000522208	0.982229	4.92392	4.92392	4.92392	4.92666	4.92666	4.92666	4.92666	4.92666
Aldh5a1	-0.162046	7.31187	4.76281	0.054687	7.20794	7.20794	7.20794	7.36999	7.36999	7.36999	7.36999	7.36999
Aldh6a1	-0.273117	6.83479	9.16931	0.0130678	6.65731	6.65731	6.65731	6.93042	6.93042	6.93042	6.93042	6.93042
Aldh7a1	-0.149612	6.82423	3.10737	0.109176	6.7282	6.7282	6.7282	6.87781	6.87781	6.87781	6.87781	6.87781
Aldh9a1	-0.0267629	5.93223	0.169277	0.689649	5.91415	5.91415	5.91415	5.94092	5.94092	5.94092	5.94092	5.94092
Aldoa	-0.217013	8.25421	4.62961	0.0575757	8.11453	8.11453	8.11453	8.33154	8.33154	8.33154	8.33154	8.33154
Aldoc	-0.573021	9.39123	16.6728	0.00231949	9.0073	9.0073	9.0073	9.58032	9.58032	9.58032	9.58032	9.58032
Alg1	-0.0296435	4.8294	0.0840665	0.77793	4.80794	4.80794	4.80794	4.83758	4.83758	4.83758	4.83758	4.83758
Alg10b	0.135564	6.34992	2.34624	0.157349	6.43201	6.43201	6.43201	6.29645	6.29645	6.29645	6.29645	6.29645
Alg11	-0.185046	5.39621	3.22656	0.103432	5.27562	5.27562	5.27562	5.46066	5.46066	5.46066	5.46066	5.46066
Alg12	-0.129627	3.85676	0.59775	0.457763	3.76847	3.76847	3.76847	3.89809	3.89809	3.89809	3.89809	3.89809
Alg13	0.355182	4.37123	14.9318	0.00328708	4.57909	4.57909	4.57909	4.22391	4.22391	4.22391	4.22391	4.22391
Alg14	-0.00406869	4.14461	0.00148688	0.970019	4.13736	4.13736	4.13736	4.14142	4.14142	4.14142	4.14142	4.14142
Alg2	-0.191901	6.86772	7.67188	0.0202328	6.74404	6.74404	6.74404	6.93595	6.93595	6.93595	6.93595	6.93595
Alg3	-0.0637973	4.45699	0.472427	0.507884	4.41296	4.41296	4.41296	4.47676	4.47676	4.47676	4.47676	4.47676
Alg5	-0.0359351	4.91257	0.144953	0.711566	4.8873	4.8873	4.8873	4.92323	4.92323	4.92323	4.92323	4.92323
Alg6	0.17318	4.32947	2.23248	0.166762	4.43122	4.43122	4.43122	4.25804	4.25804	4.25804	4.25804	4.25804
Alg8	0.328307	3.05808	4.21452	0.0678788	3.24503	3.24503	3.24503	2.91672	2.91672	2.91672	2.91672	2.91672
Alg9	-0.0941656	4.81525	0.799052	0.392897	4.75262	4.75262	4.75262	4.84678	4.84678	4.84678	4.84678	4.84678
Alk	0.0841937	4.34626	0.492476	0.499225	4.39431	4.39431	4.39431	4.31012	4.31012	4.31012	4.31012	4.31012
Alkbh1	-0.0748865	4.68735	0.366978	0.558487	4.63675	4.63675	4.63675	4.71164	4.71164	4.71164	4.71164	4.71164
Alkbh2	0.20639	1.39966	0.749303	0.407482	1.49218	1.49218	1.49218	1.28579	1.28579	1.28579	1.28579	1.28579
Alkbh3	0.137347	4.06241	1.39012	0.266342	4.14188	4.14188	4.14188	4.00453	4.00453	4.00453	4.00453	4.00453
Alkbh4	-0.0117109	3.0623	0.00597102	0.939969	3.04522	3.04522	3.04522	3.05693	3.05693	3.05693	3.05693	3.05693
Alkbh5	0.0846854	6.93654	1.38467	0.267223	6.98822	6.98822	6.98822	6.90353	6.90353	6.90353	6.90353	6.90353
Alkbh6	-0.0927473	4.43981	0.931946	0.35768	4.37726	4.37726	4.37726	4.47001	4.47001	4.47001	4.47001	4.47001
Alkbh7	-0.374553	2.9556	4.22248	0.0676607	2.69781	2.69781	2.69781	3.07236	3.07236	3.07236	3.07236	3.07236
Alkbh8	-0.0646485	5.57029	0.688125	0.426636	5.52764	5.52764	5.52764	5.59229	5.59229	5.59229	5.59229	5.59229
Alms1	0.224809	4.78949	3.64652	0.086	4.92293	4.92293	4.92293	4.69812	4.69812	4.69812	4.69812	4.69812
Alox12	0.416716	1.47649	4.86383	0.0526151	1.69603	1.69603	1.69603	1.27931	1.27931	1.27931	1.27931	1.27931
Alox5	-0.335685	3.82367	2.18061	0.171298	3.59868	3.59868	3.59868	3.93436	3.93436	3.93436	3.93436	3.93436
Alox5ap	0.392634	3.55352	3.04967	0.112102	3.77956	3.77956	3.77956	3.38692	3.38692	3.38692	3.38692	3.38692
Alox8	-0.936092	-1.28085	3.95451	0.0755137	-2.16805	-2.16805	-2.16805	-1.23196	-1.23196	-1.23196	-1.23196	-1.23196
Aloxe3	-0.044934	-0.638904	0.0174388	0.897624	-0.798684	-0.798684	-0.798684	-0.75375	-0.75375	-0.75375	-0.75375	-0.75375
Alpk1	-0.317381	3.9472	1.55896	0.240951	3.73492	3.73492	3.73492	4.0523	4.0523	4.0523	4.0523	4.0523
Alpk3	0.0339377	-0.099891	0.00606788	0.939485	-0.175475	-0.175475	-0.175475	-0.209413	-0.209413	-0.209413	-0.209413	-0.209413
Alpl	0.309048	4.79587	2.79081	0.126526	4.97843	4.97843	4.97843	4.66938	4.66938	4.66938	4.66938	4.66938
Als2	0.0291717	5.70673	0.146177	0.710414	5.72333	5.72333	5.72333	5.69416	5.69416	5.69416	5.69416	5.69416
Als2cl	-0.117864	5.83389	0.669786	0.432664	5.75761	5.75761	5.75761	5.87548	5.87548	5.87548	5.87548	5.87548
Alx1	0.0936005	-1.52246	0.0284552	0.869489	-1.7291	-1.7291	-1.7291	-1.8227	-1.8227	-1.8227	-1.8227	-1.8227
Alx3	0.589561	2.02419	5.60162	0.0400874	2.34611	2.34611	2.34611	1.75654	1.75654	1.75654	1.75654	1.75654
Alx4	0.545052	3.87926	2.7873	0.126738	4.19032	4.19032	4.19032	3.64527	3.64527	3.64527	3.64527	3.64527
Alyref	0.0983989	5.42167	1.70942	0.221036	5.48058	5.48058	5.48058	5.38218	5.38218	5.38218	5.38218	5.38218
Alyref2	0.16732	2.44379	1.22034	0.295797	2.53078	2.53078	2.53078	2.36346	2.36346	2.36346	2.36346	2.36346
Amacr	0.141189	3.05036	0.941348	0.355373	3.1272	3.1272	3.1272	2.98602	2.98602	2.98602	2.98602	2.98602
Ambra1	-0.0216827	6.0497	0.0435241	0.839033	6.03476	6.03476	6.03476	6.05644	6.05644	6.05644	6.05644	6.05644
Amd1	-0.133567	5.65604	1.11582	0.316278	5.56915	5.56915	5.56915	5.70272	5.70272	5.70272	5.70272	5.70272
Amd2	-0.410786	-0.931566	0.435814	0.524431	-1.37469	-1.37469	-1.37469	-0.963903	-0.963903	-0.963903	-0.963903	-0.963903
Amdhd2	-0.0585194	4.10683	0.222303	0.647659	4.06508	4.06508	4.06508	4.1236	4.1236	4.1236	4.1236	4.1236
Amer1	0.0768622	4.85444	0.569315	0.468355	4.89916	4.89916	4.89916	4.8223	4.8223	4.8223	4.8223	4.8223
Amer2	0.028499	6.89794	0.124464	0.731747	6.91497	6.91497	6.91497	6.88647	6.88647	6.88647	6.88647	6.88647
Amer3	-0.236829	1.69236	1.14138	0.311085	1.5124	1.5124	1.5124	1.74923	1.74923	1.74923	1.74923	1.74923
Amfr	-0.0227248	7.93187	0.109917	0.747252	7.91728	7.91728	7.91728	7.94001	7.94001	7.94001	7.94001	7.94001
Amh	0.308338	-1.25747	0.399948	0.541655	-1.28358	-1.28358	-1.28358	-1.59191	-1.59191	-1.59191	-1.59191	-1.59191
Amigo1	-0.0945759	3.98859	0.542172	0.478867	3.92337	3.92337	3.92337	4.01795	4.01795	4.01795	4.01795	4.01795
Amigo2	-0.257125	2.52229	1.97952	0.190494	2.3404	2.3404	2.3404	2.59752	2.59752	2.59752	2.59752	2.59752
Amigo3	-0.112797	2.01193	0.376469	0.553536	1.91955	1.91955	1.91955	2.03235	2.03235	2.03235	2.03235	2.03235
Ammecr1	-0.153373	3.83793	1.41046	0.263093	3.73427	3.73427	3.73427	3.88764	3.88764	3.88764	3.88764	3.88764
Ammecr1l	-0.0566548	6.23722	0.64958	0.439468	6.20033	6.20033	6.20033	6.25699	6.25699	6.25699	6.25699	6.25699
Amn1	-0.214854	4.02818	1.4198	0.26162	3.88491	3.88491	3.88491	4.09976	4.09976	4.09976	4.09976	4.09976
Amot	-0.229463	5.28647	3.02432	0.113419	5.13661	5.13661	5.13661	5.36607	5.36607	5.36607	5.36607	5.36607
Amotl1	0.0657661	6.25569	0.606968	0.454417	6.2954	6.2954	6.2954	6.22964	6.22964	6.22964	6.22964	6.22964
Amotl2	-0.242366	6.43296	8.9028	0.0140831	6.27571	6.27571	6.27571	6.51808	6.51808	6.51808	6.51808	6.51808
Ampd2	0.00165916	5.94556	0.000266853	0.987296	5.94532	5.94532	5.94532	5.94366	5.94366	5.94366	5.94366	5.94366
Ampd3	-0.142303	6.80443	2.42552	0.151194	6.71313	6.71313	6.71313	6.85543	6.85543	6.85543	6.85543	6.85543
Amph	-0.0450836	6.13082	0.33503	0.575832	6.10131	6.10131	6.10131	6.14639	6.14639	6.14639	6.14639	6.14639
Amt	-0.310333	5.01748	11.6806	0.00681098	4.81311	4.81311	4.81311	5.12344	5.12344	5.12344	5.12344	5.12344
Amy1	-0.269212	1.19311	0.457549	0.514489	0.98463	0.98463	0.98463	1.25384	1.25384	1.25384	1.25384	1.25384
Amz1	-0.384346	6.19736	34.5704	0.00017127	5.94424	5.94424	5.94424	6.32859	6.32859	6.32859	6.32859	6.32859
Amz2	-0.0239936	5.77476	0.0965941	0.762495	5.75825	5.75825	5.75825	5.78225	5.78225	5.78225	5.78225	5.78225
Anapc1	0.0813364	7.75165	1.40119	0.264566	7.80155	7.80155	7.80155	7.72021	7.72021	7.72021	7.72021	7.72021
Anapc10	-0.0608497	4.42437	0.153695	0.703457	4.38208	4.38208	4.38208	4.44293	4.44293	4.44293	4.44293	4.44293
Anapc11	-0.0709698	5.54505	0.521587	0.487117	5.49861	5.49861	5.49861	5.56958	5.56958	5.56958	5.56958	5.56958
Anapc13	-0.0698355	4.21999	0.250738	0.62766	4.17144	4.17144	4.17144	4.24128	4.24128	4.24128	4.24128	4.24128
Anapc15	0.243201	4.31315	5.34482	0.0439818	4.45641	4.45641	4.45641	4.21321	4.21321	4.21321	4.21321	4.21321
Anapc16	-0.19708	5.74416	5.27869	0.0450592	5.61638	5.61638	5.61638	5.81346	5.81346	5.81346	5.81346	5.81346
Anapc2	-0.0553824	6.78436	0.798549	0.39304	6.74876	6.74876	6.74876	6.80414	6.80414	6.80414	6.80414	6.80414
Anapc4	-0.0491283	5.97942	0.374926	0.554335	5.94704	5.94704	5.94704	5.99617	5.99617	5.99617	5.99617	5.99617
Anapc5	0.0303624	7.42906	0.19027	0.672187	7.44751	7.44751	7.44751	7.41714	7.41714	7.41714	7.41714	7.41714
Anapc7	-0.00430114	5.60488	0.00281867	0.958731	5.60065	5.60065	5.60065	5.60495	5.60495	5.60495	5.60495	5.60495
Ang	0.783349	2.43254	1.32702	0.276787	2.85485	2.85485	2.85485	2.0715	2.0715	2.0715	2.0715	2.0715
Angel1	-0.0142553	4.44659	0.0344539	0.856547	4.43386	4.43386	4.43386	4.44811	4.44811	4.44811	4.44811	4.44811
Angel2	-0.0845691	6.01711	1.74902	0.216167	5.96234	5.96234	5.96234	6.04691	6.04691	6.04691	6.04691	6.04691
Angpt1	-0.367473	4.04163	1.36181	0.270958	3.79553	3.79553	3.79553	4.163	4.163	4.163	4.163	4.163
Angpt2	0.432247	2.45083	1.44175	0.258201	2.6922	2.6922	2.6922	2.25995	2.25995	2.25995	2.25995	2.25995
Angpt4	0.317483	0.00662319	0.339635	0.573264	0.127241	0.127241	0.127241	-0.190242	-0.190242	-0.190242	-0.190242	-0.190242
Angptl1	0.31153	1.98631	1.3259	0.276977	2.15341	2.15341	2.15341	1.84188	1.84188	1.84188	1.84188	1.84188
Angptl2	0.209921	2.8883	0.678909	0.429648	3.00513	3.00513	3.00513	2.79521	2.79521	2.79521	2.79521	2.79521
Angptl4	0.0553048	4.01429	0.0545191	0.820205	4.04352	4.04352	4.04352	3.98822	3.98822	3.98822	3.98822	3.98822
Angptl6	-0.254858	2.22999	2.06798	0.181717	2.04655	2.04655	2.04655	2.30141	2.30141	2.30141	2.30141	2.30141
Angptl7	0.0824057	2.68136	0.0420229	0.84179	2.71733	2.71733	2.71733	2.63493	2.63493	2.63493	2.63493	2.63493
Ank	-0.172746	6.84308	5.17725	0.0467758	6.73192	6.73192	6.73192	6.90467	6.90467	6.90467	6.90467	6.90467
Ank1	-0.0243627	5.51379	0.0611005	0.809889	5.49671	5.49671	5.49671	5.52107	5.52107	5.52107	5.52107	5.52107
Ank2	-0.223458	8.35292	6.92653	0.0255745	8.20899	8.20899	8.20899	8.43245	8.43245	8.43245	8.43245	8.43245
Ank3	-0.110501	8.12243	0.418889	0.532426	8.05202	8.05202	8.05202	8.16252	8.16252	8.16252	8.16252	8.16252
Ankef1	0.552154	-0.491057	1.06192	0.327651	-0.293643	-0.293643	-0.293643	-0.845797	-0.845797	-0.845797	-0.845797	-0.845797
Ankfn1	-0.102159	3.58017	0.351801	0.566592	3.50831	3.50831	3.50831	3.61047	3.61047	3.61047	3.61047	3.61047
Ankfy1	0.0557879	7.39609	0.827794	0.384841	7.4302	7.4302	7.4302	7.37442	7.37442	7.37442	7.37442	7.37442
Ankhd1	0.128279	6.10014	2.0307	0.185349	6.1777	6.1777	6.1777	6.04942	6.04942	6.04942	6.04942	6.04942
Ankib1	-0.037032	7.00604	0.160617	0.697226	6.98203	6.98203	6.98203	7.01906	7.01906	7.01906	7.01906	7.01906
Ankle1	0.589543	2.54562	7.39717	0.0220266	2.87213	2.87213	2.87213	2.28258	2.28258	2.28258	2.28258	2.28258
Ankle2	0.04424	6.08682	0.386866	0.548212	6.11306	6.11306	6.11306	6.06882	6.06882	6.06882	6.06882	6.06882
Ankmy1	-0.125777	-1.729	0.0445722	0.837138	-2.12303	-2.12303	-2.12303	-1.99725	-1.99725	-1.99725	-1.99725	-1.99725
Ankmy2	0.000263938	5.43833	1.19195e-05	0.997315	5.43649	5.43649	5.43649	5.43623	5.43623	5.43623	5.43623	5.43623
Ankra2	-0.150188	5.72781	2.46707	0.148092	5.63046	5.63046	5.63046	5.78065	5.78065	5.78065	5.78065	5.78065
Ankrd10	-0.0994718	6.428	0.451344	0.517291	6.36398	6.36398	6.36398	6.46345	6.46345	6.46345	6.46345	6.46345
Ankrd11	0.00271134	8.74176	0.000666176	0.979929	8.74325	8.74325	8.74325	8.74054	8.74054	8.74054	8.74054	8.74054
Ankrd12	-0.0497415	5.9246	0.28636	0.604546	5.89182	5.89182	5.89182	5.94156	5.94156	5.94156	5.94156	5.94156
Ankrd13a	0.0585816	6.99299	0.75498	0.405775	7.02868	7.02868	7.02868	6.9701	6.9701	6.9701	6.9701	6.9701
Ankrd13b	-0.142227	5.6693	4.29006	0.065843	5.57708	5.57708	5.57708	5.71931	5.71931	5.71931	5.71931	5.71931
Ankrd13c	-0.00490668	6.53128	0.00335502	0.95498	6.52724	6.52724	6.52724	6.53215	6.53215	6.53215	6.53215	6.53215
Ankrd13d	-0.17091	4.73532	1.27406	0.286001	4.62294	4.62294	4.62294	4.79385	4.79385	4.79385	4.79385	4.79385
Ankrd16	-0.20492	5.5508	1.14232	0.310896	5.41751	5.41751	5.41751	5.62243	5.62243	5.62243	5.62243	5.62243
Ankrd17	0.0710802	7.57989	1.08001	0.323768	7.62346	7.62346	7.62346	7.55238	7.55238	7.55238	7.55238	7.55238
Ankrd23	-0.394536	0.83989	0.700333	0.422699	0.533662	0.533662	0.533662	0.928198	0.928198	0.928198	0.928198	0.928198
Ankrd24	-0.0859312	3.99863	0.563261	0.470665	3.93902	3.93902	3.93902	4.02495	4.02495	4.02495	4.02495	4.02495
Ankrd26	0.033876	4.9136	0.0917639	0.768308	4.93182	4.93182	4.93182	4.89794	4.89794	4.89794	4.89794	4.89794
Ankrd27	-0.0704829	5.30374	0.392862	0.545187	5.25703	5.25703	5.25703	5.32752	5.32752	5.32752	5.32752	5.32752
Ankrd28	-0.272438	8.18178	3.42152	0.0948344	8.00523	8.00523	8.00523	8.27766	8.27766	8.27766	8.27766	8.27766
Ankrd29	-0.144299	3.68392	0.511995	0.491048	3.58562	3.58562	3.58562	3.72992	3.72992	3.72992	3.72992	3.72992
Ankrd33b	0.684382	1.44079	5.12069	0.047768	1.8073	1.8073	1.8073	1.12292	1.12292	1.12292	1.12292	1.12292
Ankrd34a	-0.320789	0.563131	1.85232	0.204124	0.292266	0.292266	0.292266	0.613054	0.613054	0.613054	0.613054	0.613054
Ankrd34b	-0.25267	2.73766	3.59165	0.0880554	2.56103	2.56103	2.56103	2.8137	2.8137	2.8137	2.8137	2.8137
Ankrd34c	-0.105168	-0.658563	0.0291522	0.867917	-0.882099	-0.882099	-0.882099	-0.776931	-0.776931	-0.776931	-0.776931	-0.776931
Ankrd35	-0.468368	1.11331	2.39785	0.153306	0.758495	0.758495	0.758495	1.22686	1.22686	1.22686	1.22686	1.22686
Ankrd37	0.124693	1.83588	0.323307	0.58248	1.88868	1.88868	1.88868	1.76399	1.76399	1.76399	1.76399	1.76399
Ankrd39	-0.171186	3.51983	1.19958	0.29971	3.40316	3.40316	3.40316	3.57435	3.57435	3.57435	3.57435	3.57435
Ankrd40	-0.159761	6.91309	3.81408	0.0800841	6.81041	6.81041	6.81041	6.97017	6.97017	6.97017	6.97017	6.97017
Ankrd42	0.166042	2.8535	1.38089	0.267836	2.94432	2.94432	2.94432	2.77828	2.77828	2.77828	2.77828	2.77828
Ankrd44	0.0334377	6.19699	0.0328629	0.859858	6.21637	6.21637	6.21637	6.18293	6.18293	6.18293	6.18293	6.18293
Ankrd45	0.192338	2.5023	1.38153	0.267732	2.60532	2.60532	2.60532	2.41298	2.41298	2.41298	2.41298	2.41298
Ankrd46	-0.151083	6.98858	4.17385	0.0690073	6.89162	6.89162	6.89162	7.04271	7.04271	7.04271	7.04271	7.04271
Ankrd49	-0.0864183	4.84644	0.408568	0.537417	4.78876	4.78876	4.78876	4.87518	4.87518	4.87518	4.87518	4.87518
Ankrd50	0.0839651	6.06696	0.797589	0.393314	6.11766	6.11766	6.11766	6.03369	6.03369	6.03369	6.03369	6.03369
Ankrd52	-0.0688665	7.00146	0.364456	0.559818	6.95735	6.95735	6.95735	7.02621	7.02621	7.02621	7.02621	7.02621
Ankrd54	-0.304788	4.52905	13.3904	0.00457903	4.32731	4.32731	4.32731	4.63209	4.63209	4.63209	4.63209	4.63209
Ankrd55	0.12813	-0.426559	0.0799092	0.783328	-0.474768	-0.474768	-0.474768	-0.602898	-0.602898	-0.602898	-0.602898	-0.602898
Ankrd6	-0.166315	6.09307	3.27558	0.10118	5.98562	5.98562	5.98562	6.15194	6.15194	6.15194	6.15194	6.15194
Ankrd61	-0.651178	-1.80659	1.12617	0.314161	-2.58856	-2.58856	-2.58856	-1.93738	-1.93738	-1.93738	-1.93738	-1.93738
Ankrd66	-0.113962	-0.869086	0.0477236	0.831575	-1.12281	-1.12281	-1.12281	-1.00885	-1.00885	-1.00885	-1.00885	-1.00885
Ankrd9	-0.312058	1.72874	3.16446	0.106375	1.49841	1.49841	1.49841	1.81046	1.81046	1.81046	1.81046	1.81046
Anks1	-0.00367163	6.28856	0.00150424	0.969844	6.28512	6.28512	6.28512	6.28879	6.28879	6.28879	6.28879	6.28879
Anks1b	0.0805775	8.59609	0.934185	0.357129	8.6457	8.6457	8.6457	8.56512	8.56512	8.56512	8.56512	8.56512
Anks3	-0.05222	5.33798	0.259567	0.621744	5.30305	5.30305	5.30305	5.35527	5.35527	5.35527	5.35527	5.35527
Anks6	0.0419167	4.85086	0.144173	0.712303	4.87405	4.87405	4.87405	4.83213	4.83213	4.83213	4.83213	4.83213
Ankub1	-0.362556	-0.432705	0.889616	0.368354	-0.792711	-0.792711	-0.792711	-0.430155	-0.430155	-0.430155	-0.430155	-0.430155
Ankzf1	-0.203253	4.42726	3.0085	0.114251	4.29287	4.29287	4.29287	4.49612	4.49612	4.49612	4.49612	4.49612
Anln	0.85642	4.77757	26.0697	0.000497378	5.24861	5.24861	5.24861	4.39219	4.39219	4.39219	4.39219	4.39219
Ano1	0.618173	3.38592	3.15055	0.107049	3.7342	3.7342	3.7342	3.11603	3.11603	3.11603	3.11603	3.11603
Ano10	-0.0262994	5.40401	0.174509	0.685181	5.38556	5.38556	5.38556	5.41186	5.41186	5.41186	5.41186	5.41186
Ano2	-0.245223	-0.227659	0.452273	0.51687	-0.483841	-0.483841	-0.483841	-0.238618	-0.238618	-0.238618	-0.238618	-0.238618
Ano3	0.939385	3.21691	66.4422	1.16553e-05	3.72258	3.72258	3.72258	2.78319	2.78319	2.78319	2.78319	2.78319
Ano4	0.00701756	4.62223	0.00327034	0.955551	4.62322	4.62322	4.62322	4.6162	4.6162	4.6162	4.6162	4.6162
Ano5	0.071637	1.63913	0.114596	0.742144	1.65676	1.65676	1.65676	1.58512	1.58512	1.58512	1.58512	1.58512
Ano6	0.254982	6.02929	8.87481	0.0141952	6.18209	6.18209	6.18209	5.92711	5.92711	5.92711	5.92711	5.92711
Ano8	-0.121522	5.91072	1.05375	0.329425	5.83217	5.83217	5.83217	5.95369	5.95369	5.95369	5.95369	5.95369
Anp32a	0.181589	6.89217	5.15029	0.0472455	7.00228	7.00228	7.00228	6.82069	6.82069	6.82069	6.82069	6.82069
Anp32b	0.0758607	5.96483	0.74042	0.410177	6.0105	6.0105	6.0105	5.93463	5.93463	5.93463	5.93463	5.93463
Anp32e	0.198916	7.60551	4.44854	0.0618127	7.7262	7.7262	7.7262	7.52728	7.52728	7.52728	7.52728	7.52728
Anpep	0.482862	3.63348	1.81227	0.208684	3.91026	3.91026	3.91026	3.4274	3.4274	3.4274	3.4274	3.4274
Antxr1	0.023686	6.5905	0.0822023	0.780332	6.60436	6.60436	6.60436	6.58067	6.58067	6.58067	6.58067	6.58067
Antxr2	0.310593	3.12358	3.50667	0.0913625	3.30078	3.30078	3.30078	2.99019	2.99019	2.99019	2.99019	2.99019
Anxa1	0.623732	2.61382	2.58302	0.139862	2.95967	2.95967	2.95967	2.33594	2.33594	2.33594	2.33594	2.33594
Anxa11	0.431087	2.2989	4.56761	0.0589848	2.53811	2.53811	2.53811	2.10702	2.10702	2.10702	2.10702	2.10702
Anxa2	0.457222	4.88089	3.3113	0.0995786	5.14695	5.14695	5.14695	4.68973	4.68973	4.68973	4.68973	4.68973
Anxa3	0.299479	5.19905	2.16865	0.172367	5.37686	5.37686	5.37686	5.07739	5.07739	5.07739	5.07739	5.07739
Anxa4	0.291361	3.14219	1.38272	0.267539	3.30837	3.30837	3.30837	3.01701	3.01701	3.01701	3.01701	3.01701
Anxa5	0.107622	5.53792	0.233027	0.639938	5.60266	5.60266	5.60266	5.49504	5.49504	5.49504	5.49504	5.49504
Anxa6	0.105676	7.08932	1.2853	0.28401	7.15391	7.15391	7.15391	7.04823	7.04823	7.04823	7.04823	7.04823
Anxa7	0.123599	4.79852	1.26698	0.287265	4.87174	4.87174	4.87174	4.74814	4.74814	4.74814	4.74814	4.74814
Anxa8	0.135721	-1.77734	0.0283269	0.869781	-2.00634	-2.00634	-2.00634	-2.14206	-2.14206	-2.14206	-2.14206	-2.14206
Anxa9	0.142278	-0.501385	0.0928211	0.767021	-0.534346	-0.534346	-0.534346	-0.676624	-0.676624	-0.676624	-0.676624	-0.676624
Aoah	0.213907	3.3377	0.542018	0.478927	3.45937	3.45937	3.45937	3.24546	3.24546	3.24546	3.24546	3.24546
Aoc2	0.0657096	1.95085	0.0976101	0.761293	1.97022	1.97022	1.97022	1.90451	1.90451	1.90451	1.90451	1.90451
Aoc3	0.531081	2.86051	1.45637	0.255959	3.15977	3.15977	3.15977	2.62869	2.62869	2.62869	2.62869	2.62869
Aopep	-0.037363	3.74468	0.103267	0.754723	3.71497	3.71497	3.71497	3.75233	3.75233	3.75233	3.75233	3.75233
Aox1	0.119707	2.1503	0.402932	0.54018	2.20565	2.20565	2.20565	2.08594	2.08594	2.08594	2.08594	2.08594
Aox3	1.26523	0.509152	6.17319	0.0328363	1.13422	1.13422	1.13422	-0.131006	-0.131006	-0.131006	-0.131006	-0.131006
Aox4	0.181799	-1.32104	0.062474	0.807812	-1.42386	-1.42386	-1.42386	-1.60566	-1.60566	-1.60566	-1.60566	-1.60566
Ap1ar	-0.0100593	5.07408	0.0190792	0.892949	5.06529	5.06529	5.06529	5.07535	5.07535	5.07535	5.07535	5.07535
Ap1b1	0.105153	6.97164	1.15017	0.309328	7.03588	7.03588	7.03588	6.93073	6.93073	6.93073	6.93073	6.93073
Ap1g1	0.0639475	7.18627	0.822946	0.386181	7.2253	7.2253	7.2253	7.16135	7.16135	7.16135	7.16135	7.16135
Ap1g2	0.262459	2.65269	2.22099	0.167753	2.79803	2.79803	2.79803	2.53557	2.53557	2.53557	2.53557	2.53557
Ap1m1	-0.11922	6.68462	3.19925	0.104713	6.60815	6.60815	6.60815	6.72737	6.72737	6.72737	6.72737	6.72737
Ap1s1	-0.0112307	5.92081	0.00784915	0.931196	5.91251	5.91251	5.91251	5.92374	5.92374	5.92374	5.92374	5.92374
Ap1s2	0.176863	5.36907	2.64657	0.1356	5.47498	5.47498	5.47498	5.29812	5.29812	5.29812	5.29812	5.29812
Ap1s3	0.80617	-1.05531	4.01844	0.0735412	-0.773882	-0.773882	-0.773882	-1.58005	-1.58005	-1.58005	-1.58005	-1.58005
Ap2a1	-0.0876528	7.4828	1.25603	0.289237	7.42692	7.42692	7.42692	7.51458	7.51458	7.51458	7.51458	7.51458
Ap2a2	0.046814	7.28993	0.24394	0.632306	7.31853	7.31853	7.31853	7.27172	7.27172	7.27172	7.27172	7.27172
Ap2b1	-0.0106955	8.16724	0.0250885	0.877378	8.16024	8.16024	8.16024	8.17094	8.17094	8.17094	8.17094	8.17094
Ap2m1	-0.0335102	7.69834	0.145345	0.711196	7.67693	7.67693	7.67693	7.71044	7.71044	7.71044	7.71044	7.71044
Ap2s1	-0.0147744	6.09546	0.0166917	0.899827	6.08517	6.08517	6.08517	6.09995	6.09995	6.09995	6.09995	6.09995
Ap3b1	0.107813	5.84813	3.11401	0.108845	5.91317	5.91317	5.91317	5.80536	5.80536	5.80536	5.80536	5.80536
Ap3b2	-0.135283	6.15975	3.50225	0.0915388	6.07256	6.07256	6.07256	6.20784	6.20784	6.20784	6.20784	6.20784
Ap3d1	-0.0565047	7.61003	0.618064	0.450443	7.57401	7.57401	7.57401	7.63052	7.63052	7.63052	7.63052	7.63052
Ap3m1	-0.0644894	6.91398	0.326869	0.580442	6.87255	6.87255	6.87255	6.93704	6.93704	6.93704	6.93704	6.93704
Ap3m2	-0.0363195	5.64544	0.251972	0.626825	5.62097	5.62097	5.62097	5.65729	5.65729	5.65729	5.65729	5.65729
Ap3s1	-0.0760511	5.3839	0.587616	0.46149	5.33391	5.33391	5.33391	5.40996	5.40996	5.40996	5.40996	5.40996
Ap3s2	-0.0742035	6.47963	0.870582	0.373313	6.43183	6.43183	6.43183	6.50604	6.50604	6.50604	6.50604	6.50604
Ap4b1	-0.182917	1.40882	0.752694	0.406461	1.25999	1.25999	1.25999	1.4429	1.4429	1.4429	1.4429	1.4429
Ap4e1	-0.0464324	5.00611	0.0897924	0.770729	4.97418	4.97418	4.97418	5.02061	5.02061	5.02061	5.02061	5.02061
Ap4m1	0.0206886	5.04212	0.046374	0.833933	5.05254	5.05254	5.05254	5.03185	5.03185	5.03185	5.03185	5.03185
Ap4s1	-0.0318351	4.45099	0.0813967	0.781379	4.42711	4.42711	4.42711	4.45895	4.45895	4.45895	4.45895	4.45895
Ap5b1	0.306165	2.73495	3.29515	0.100299	2.90652	2.90652	2.90652	2.60035	2.60035	2.60035	2.60035	2.60035
Ap5m1	-0.00851892	5.20236	0.0051189	0.944408	5.19462	5.19462	5.19462	5.20314	5.20314	5.20314	5.20314	5.20314
Ap5s1	-0.0673443	3.76989	0.345207	0.570188	3.72122	3.72122	3.72122	3.78856	3.78856	3.78856	3.78856	3.78856
Ap5z1	0.0684131	5.28237	0.219843	0.649462	5.32261	5.32261	5.32261	5.2542	5.2542	5.2542	5.2542	5.2542
Apaf1	0.438871	5.1139	22.7288	0.000814314	5.37016	5.37016	5.37016	4.93129	4.93129	4.93129	4.93129	4.93129
Apba1	-0.0860474	6.69825	0.913786	0.362201	6.64301	6.64301	6.64301	6.72906	6.72906	6.72906	6.72906	6.72906
Apba2	-0.118418	7.26868	2.59285	0.139191	7.19295	7.19295	7.19295	7.31137	7.31137	7.31137	7.31137	7.31137
Apba3	-0.199327	5.12907	4.18656	0.0686521	4.99886	4.99886	4.99886	5.19819	5.19819	5.19819	5.19819	5.19819
Apbb1	-0.362394	7.54084	8.59989	0.0153562	7.30338	7.30338	7.30338	7.66578	7.66578	7.66578	7.66578	7.66578
Apbb1ip	0.551195	5.2867	5.67685	0.0390279	5.60432	5.60432	5.60432	5.05313	5.05313	5.05313	5.05313	5.05313
Apbb2	0.100818	5.25463	1.40348	0.264202	5.31457	5.31457	5.31457	5.21375	5.21375	5.21375	5.21375	5.21375
Apbb3	-0.140919	4.90903	2.02698	0.185718	4.81655	4.81655	4.81655	4.95747	4.95747	4.95747	4.95747	4.95747
Apc	-0.791897	9.26931	2.74409	0.129378	8.72607	8.72607	8.72607	9.51797	9.51797	9.51797	9.51797	9.51797
Apc2	-0.113583	8.2509	1.22625	0.294696	8.1786	8.1786	8.1786	8.29218	8.29218	8.29218	8.29218	8.29218
Apcdd1	0.39284	7.90692	4.83309	0.0532351	8.13937	8.13937	8.13937	7.74653	7.74653	7.74653	7.74653	7.74653
Apeh	-0.205435	5.11904	5.62086	0.0398131	4.98483	4.98483	4.98483	5.19027	5.19027	5.19027	5.19027	5.19027
Apex1	0.00159699	5.42592	0.000170939	0.989832	5.42517	5.42517	5.42517	5.42357	5.42357	5.42357	5.42357	5.42357
Apex2	0.0938598	3.32889	0.649638	0.439448	3.37884	3.37884	3.37884	3.28498	3.28498	3.28498	3.28498	3.28498
Aph1a	-0.0515489	5.9194	0.280715	0.60808	5.88552	5.88552	5.88552	5.93707	5.93707	5.93707	5.93707	5.93707
Aph1b	-0.0432408	5.66896	0.346879	0.569272	5.64006	5.64006	5.64006	5.6833	5.6833	5.6833	5.6833	5.6833
Aph1c	-0.14818	2.95214	0.966923	0.349208	2.84632	2.84632	2.84632	2.9945	2.9945	2.9945	2.9945	2.9945
Api5	0.0169055	7.1508	0.0408422	0.843995	7.1607	7.1607	7.1607	7.1438	7.1438	7.1438	7.1438	7.1438
Apip	-0.0594774	3.95594	0.323705	0.582251	3.91303	3.91303	3.91303	3.9725	3.9725	3.9725	3.9725	3.9725
Aplf	-0.0124591	3.24451	0.0127729	0.912309	3.22791	3.22791	3.22791	3.24036	3.24036	3.24036	3.24036	3.24036
Apln	0.220687	5.00236	2.17025	0.172223	5.13369	5.13369	5.13369	4.913	4.913	4.913	4.913	4.913
Aplnr	0.649383	5.27315	5.37709	0.0434676	5.64182	5.64182	5.64182	4.99243	4.99243	4.99243	4.99243	4.99243
Aplp1	-0.314635	9.11476	2.0594	0.182545	8.91005	8.91005	8.91005	9.22468	9.22468	9.22468	9.22468	9.22468
Aplp2	0.0668081	9.26323	0.708992	0.419943	9.30448	9.30448	9.30448	9.23768	9.23768	9.23768	9.23768	9.23768
Apmap	-0.00836018	5.74072	0.0196739	0.891305	5.73392	5.73392	5.73392	5.74228	5.74228	5.74228	5.74228	5.74228
Apob	0.837245	0.245345	2.10366	0.178329	0.637395	0.637395	0.637395	-0.19985	-0.19985	-0.19985	-0.19985	-0.19985
Apobec1	0.485683	3.39246	6.84291	0.0262761	3.66919	3.66919	3.66919	3.1835	3.1835	3.1835	3.1835	3.1835
Apobec3	0.0219588	4.19797	0.00778308	0.931485	4.2072	4.2072	4.2072	4.18524	4.18524	4.18524	4.18524	4.18524
Apobr	0.371649	2.47337	1.65667	0.227755	2.67911	2.67911	2.67911	2.30746	2.30746	2.30746	2.30746	2.30746
Apoc1	-0.637687	1.64586	3.34556	0.0980725	1.17956	1.17956	1.17956	1.81725	1.81725	1.81725	1.81725	1.81725
Apod	0.308717	6.63975	2.68844	0.132882	6.82393	6.82393	6.82393	6.51521	6.51521	6.51521	6.51521	6.51521
Apoe	-0.150256	11.8218	0.736227	0.411458	11.7261	11.7261	11.7261	11.8763	11.8763	11.8763	11.8763	11.8763
Apol10b	-0.23602	-0.818383	0.224102	0.646348	-1.12701	-1.12701	-1.12701	-0.890991	-0.890991	-0.890991	-0.890991	-0.890991
Apol11b	0.70217	-1.05437	1.81455	0.208421	-0.830651	-0.830651	-0.830651	-1.53282	-1.53282	-1.53282	-1.53282	-1.53282
Apold1	0.299159	5.41371	0.867011	0.374255	5.59175	5.59175	5.59175	5.29259	5.29259	5.29259	5.29259	5.29259
Apoo	-0.0668366	3.73527	0.367548	0.558187	3.6868	3.6868	3.6868	3.75364	3.75364	3.75364	3.75364	3.75364
Apool	0.119184	3.09606	0.499413	0.496291	3.15971	3.15971	3.15971	3.04053	3.04053	3.04053	3.04053	3.04053
Apopt1	-0.0779831	4.35257	0.629716	0.446332	4.29923	4.29923	4.29923	4.37721	4.37721	4.37721	4.37721	4.37721
App	-0.0651739	9.64659	0.200791	0.663871	9.6054	9.6054	9.6054	9.67058	9.67058	9.67058	9.67058	9.67058
Appbp2	-0.082064	7.36128	1.03963	0.332529	7.30888	7.30888	7.30888	7.39095	7.39095	7.39095	7.39095	7.39095
Appbp2os	-0.292714	-1.30362	0.34844	0.568419	-1.72091	-1.72091	-1.72091	-1.4282	-1.4282	-1.4282	-1.4282	-1.4282
Appl1	-0.0161331	6.97169	0.0342158	0.857038	6.96085	6.96085	6.96085	6.97699	6.97699	6.97699	6.97699	6.97699
Appl2	-0.175176	7.06136	1.39668	0.265289	6.94876	6.94876	6.94876	7.12393	7.12393	7.12393	7.12393	7.12393
Aprt	-0.327963	4.77223	8.20914	0.0172123	4.5555	4.5555	4.5555	4.88346	4.88346	4.88346	4.88346	4.88346
Aptx	-0.146246	4.45682	3.37223	0.09692	4.35976	4.35976	4.35976	4.50601	4.50601	4.50601	4.50601	4.50601
Aqp1	0.300969	3.80839	1.62284	0.23221	3.98352	3.98352	3.98352	3.68255	3.68255	3.68255	3.68255	3.68255
Aqp11	-0.0906179	3.34197	0.411916	0.535788	3.27621	3.27621	3.27621	3.36683	3.36683	3.36683	3.36683	3.36683
Aqp3	-0.378226	-0.102687	0.875825	0.371937	-0.450514	-0.450514	-0.450514	-0.0722888	-0.0722888	-0.0722888	-0.0722888	-0.0722888
Aqp4	-0.579058	9.08191	5.40739	0.0429914	8.69363	8.69363	8.69363	9.27269	9.27269	9.27269	9.27269	9.27269
Aqp5	0.646919	-0.848201	1.35818	0.271558	-0.608654	-0.608654	-0.608654	-1.25557	-1.25557	-1.25557	-1.25557	-1.25557
Aqp9	-0.171755	1.8025	1.18463	0.302574	1.66756	1.66756	1.66756	1.83932	1.83932	1.83932	1.83932	1.83932
Aqr	0.0528215	5.9726	0.436064	0.524314	6.00403	6.00403	6.00403	5.95121	5.95121	5.95121	5.95121	5.95121
Ar	-0.138346	-0.29123	0.104022	0.753861	-0.491961	-0.491961	-0.491961	-0.353615	-0.353615	-0.353615	-0.353615	-0.353615
Araf	-0.172352	6.76761	2.52898	0.143622	6.65664	6.65664	6.65664	6.82899	6.82899	6.82899	6.82899	6.82899
Arap1	-0.0126127	6.85214	0.0215164	0.886368	6.84359	6.84359	6.84359	6.8562	6.8562	6.8562	6.8562	6.8562
Arap2	0.077902	5.94572	0.716227	0.417662	5.99266	5.99266	5.99266	5.91476	5.91476	5.91476	5.91476	5.91476
Arap3	0.500704	5.52309	4.86954	0.052501	5.81369	5.81369	5.81369	5.31299	5.31299	5.31299	5.31299	5.31299
Arc	-0.130323	3.75675	0.130407	0.725709	3.6678	3.6678	3.6678	3.79812	3.79812	3.79812	3.79812	3.79812
Arcn1	-0.043665	7.49792	0.261953	0.620168	7.46996	7.46996	7.46996	7.51362	7.51362	7.51362	7.51362	7.51362
Arel1	-0.07674	7.04037	1.12905	0.313575	6.99125	6.99125	6.99125	7.06799	7.06799	7.06799	7.06799	7.06799
Arf1	-0.00220552	8.07543	0.000760243	0.978559	8.07376	8.07376	8.07376	8.07597	8.07597	8.07597	8.07597	8.07597
Arf2	-0.0460585	6.04871	0.182402	0.67859	6.01858	6.01858	6.01858	6.06464	6.06464	6.06464	6.06464	6.06464
Arf3	0.00368316	7.92143	0.00204516	0.964842	7.92341	7.92341	7.92341	7.91972	7.91972	7.91972	7.91972	7.91972
Arf4	-0.161885	7.6814	2.24021	0.1661	7.57766	7.57766	7.57766	7.73955	7.73955	7.73955	7.73955	7.73955
Arf5	-0.0949541	6.3267	1.22147	0.295585	6.2657	6.2657	6.2657	6.36065	6.36065	6.36065	6.36065	6.36065
Arf6	0.206681	6.10421	4.36799	0.0638217	6.22888	6.22888	6.22888	6.0222	6.0222	6.0222	6.0222	6.0222
Arfgap1	-0.152503	6.44415	2.2433	0.165835	6.346	6.346	6.346	6.4985	6.4985	6.4985	6.4985	6.4985
Arfgap2	-0.0705012	6.43637	1.08807	0.322059	6.39093	6.39093	6.39093	6.46143	6.46143	6.46143	6.46143	6.46143
Arfgap3	-0.00257097	4.60761	0.000994733	0.975475	4.60256	4.60256	4.60256	4.60513	4.60513	4.60513	4.60513	4.60513
Arfgef1	0.0582296	6.88232	0.515895	0.489443	6.91766	6.91766	6.91766	6.85943	6.85943	6.85943	6.85943	6.85943
Arfgef2	-0.0373387	5.88155	0.16397	0.694264	5.85666	5.85666	5.85666	5.894	5.894	5.894	5.894	5.894
Arfgef3	-0.00138334	5.93687	0.000201392	0.988963	5.9346	5.9346	5.9346	5.93598	5.93598	5.93598	5.93598	5.93598
Arfip1	-0.0138066	3.35629	0.00388003	0.95159	3.33989	3.33989	3.33989	3.35369	3.35369	3.35369	3.35369	3.35369
Arfip2	-0.171776	5.88534	7.02523	0.0247758	5.77414	5.77414	5.77414	5.94592	5.94592	5.94592	5.94592	5.94592
Arfrp1	-0.044567	5.22014	0.212062	0.65525	5.18986	5.18986	5.18986	5.23443	5.23443	5.23443	5.23443	5.23443
Arg1	0.126781	1.50492	0.0763276	0.788102	1.5484	1.5484	1.5484	1.42162	1.42162	1.42162	1.42162	1.42162
Arg2	-0.481661	-0.483973	1.25466	0.289485	-0.927814	-0.927814	-0.927814	-0.446153	-0.446153	-0.446153	-0.446153	-0.446153
Arglu1	-0.147028	7.68735	0.469738	0.509066	7.59327	7.59327	7.59327	7.74029	7.74029	7.74029	7.74029	7.74029
Arhgap1	-0.0258857	6.55916	0.141819	0.714541	6.54204	6.54204	6.54204	6.56793	6.56793	6.56793	6.56793	6.56793
Arhgap10	0.235468	3.44546	1.52019	0.246477	3.58084	3.58084	3.58084	3.34537	3.34537	3.34537	3.34537	3.34537
Arhgap11a	0.742528	4.71977	35.6423	0.000152024	5.13522	5.13522	5.13522	4.39269	4.39269	4.39269	4.39269	4.39269
Arhgap12	0.0455467	6.20398	0.328548	0.579488	6.23109	6.23109	6.23109	6.18555	6.18555	6.18555	6.18555	6.18555
Arhgap15	0.278101	0.386201	0.799436	0.392788	0.491041	0.491041	0.491041	0.21294	0.21294	0.21294	0.21294	0.21294
Arhgap17	0.135168	5.80294	0.976968	0.346831	5.88438	5.88438	5.88438	5.74921	5.74921	5.74921	5.74921	5.74921
Arhgap18	0.284108	4.23284	2.90768	0.119738	4.39977	4.39977	4.39977	4.11566	4.11566	4.11566	4.11566	4.11566
Arhgap19	0.506409	5.29941	8.22252	0.0171444	5.59308	5.59308	5.59308	5.08667	5.08667	5.08667	5.08667	5.08667
Arhgap20	-0.0991826	5.77827	0.968546	0.348823	5.71371	5.71371	5.71371	5.8129	5.8129	5.8129	5.8129	5.8129
Arhgap21	-0.0106397	7.5808	0.0151663	0.904487	7.5737	7.5737	7.5737	7.58434	7.58434	7.58434	7.58434	7.58434
Arhgap22	-0.0111871	3.30727	0.0031129	0.956633	3.29207	3.29207	3.29207	3.30326	3.30326	3.30326	3.30326	3.30326
Arhgap23	-0.199531	7.03027	0.660428	0.435793	6.90152	6.90152	6.90152	7.10105	7.10105	7.10105	7.10105	7.10105
Arhgap24	-0.336344	4.89014	17.9709	0.00181664	4.66786	4.66786	4.66786	5.00421	5.00421	5.00421	5.00421	5.00421
Arhgap25	0.472103	3.99556	4.50491	0.0604534	4.26764	4.26764	4.26764	3.79553	3.79553	3.79553	3.79553	3.79553
Arhgap26	-0.147841	4.25894	1.11865	0.315697	4.16023	4.16023	4.16023	4.30807	4.30807	4.30807	4.30807	4.30807
Arhgap27	0.609792	4.62085	6.75096	0.027075	4.96822	4.96822	4.96822	4.35843	4.35843	4.35843	4.35843	4.35843
Arhgap27os3	0.644168	-0.198742	2.78275	0.127013	0.0903072	0.0903072	0.0903072	-0.553861	-0.553861	-0.553861	-0.553861	-0.553861
Arhgap28	0.568047	1.31532	1.88179	0.200854	1.61924	1.61924	1.61924	1.05119	1.05119	1.05119	1.05119	1.05119
Arhgap29	0.268713	5.06377	1.23541	0.293001	5.22348	5.22348	5.22348	4.95477	4.95477	4.95477	4.95477	4.95477
Arhgap30	0.723084	5.1496	10.5416	0.00905086	5.55622	5.55622	5.55622	4.83313	4.83313	4.83313	4.83313	4.83313
Arhgap31	0.0103186	8.65082	0.012702	0.912551	8.65704	8.65704	8.65704	8.64672	8.64672	8.64672	8.64672	8.64672
Arhgap32	-0.0539843	6.61794	0.383908	0.549716	6.58307	6.58307	6.58307	6.63706	6.63706	6.63706	6.63706	6.63706
Arhgap33	-0.0132861	7.3853	0.0134887	0.909897	7.37643	7.37643	7.37643	7.38972	7.38972	7.38972	7.38972	7.38972
Arhgap35	-0.217412	9.1597	2.89134	0.120658	9.01986	9.01986	9.01986	9.23727	9.23727	9.23727	9.23727	9.23727
Arhgap36	-0.605894	-0.62209	1.31559	0.27874	-1.17092	-1.17092	-1.17092	-0.565029	-0.565029	-0.565029	-0.565029	-0.565029
Arhgap39	0.186061	6.14855	1.54254	0.24327	6.26097	6.26097	6.26097	6.07491	6.07491	6.07491	6.07491	6.07491
Arhgap4	0.671992	4.89508	4.12516	0.0703893	5.27529	5.27529	5.27529	4.6033	4.6033	4.6033	4.6033	4.6033
Arhgap42	-0.12203	4.74762	1.23551	0.292983	4.66686	4.66686	4.66686	4.78889	4.78889	4.78889	4.78889	4.78889
Arhgap44	-0.118492	5.23908	2.71394	0.131262	5.16166	5.16166	5.16166	5.28015	5.28015	5.28015	5.28015	5.28015
Arhgap45	0.611991	5.89206	5.44879	0.0423514	6.24269	6.24269	6.24269	5.6307	5.6307	5.6307	5.6307	5.6307
Arhgap5	-0.024353	7.56239	0.0165314	0.900306	7.54656	7.54656	7.54656	7.57091	7.57091	7.57091	7.57091	7.57091
Arhgap6	0.0836195	1.37042	0.14778	0.708913	1.38945	1.38945	1.38945	1.30583	1.30583	1.30583	1.30583	1.30583
Arhgap8	1.02289	-1.26098	3.02087	0.113599	-0.915058	-0.915058	-0.915058	-1.93795	-1.93795	-1.93795	-1.93795	-1.93795
Arhgap9	0.275894	3.17613	2.02379	0.186033	3.33339	3.33339	3.33339	3.05749	3.05749	3.05749	3.05749	3.05749
Arhgdia	0.00436905	8.81598	0.00218082	0.963695	8.81852	8.81852	8.81852	8.81415	8.81415	8.81415	8.81415	8.81415
Arhgdib	0.561547	5.07626	10.6229	0.00886391	5.39912	5.39912	5.39912	4.83758	4.83758	4.83758	4.83758	4.83758
Arhgdig	-0.287976	3.4608	0.963592	0.350002	3.26559	3.26559	3.26559	3.55357	3.55357	3.55357	3.55357	3.55357
Arhgef1	-0.0458635	7.11615	0.0623937	0.807933	7.08668	7.08668	7.08668	7.13254	7.13254	7.13254	7.13254	7.13254
Arhgef10	-0.424527	6.83483	2.86619	0.122094	6.55421	6.55421	6.55421	6.97874	6.97874	6.97874	6.97874	6.97874
Arhgef10l	-0.358943	6.79804	10.3228	0.00957845	6.56257	6.56257	6.56257	6.92151	6.92151	6.92151	6.92151	6.92151
Arhgef11	0.0268362	6.83014	0.0668755	0.801316	6.84599	6.84599	6.84599	6.81916	6.81916	6.81916	6.81916	6.81916
Arhgef12	0.0206284	7.75902	0.0644718	0.804834	7.77148	7.77148	7.77148	7.75085	7.75085	7.75085	7.75085	7.75085
Arhgef15	0.500939	3.44782	4.31052	0.0653045	3.73359	3.73359	3.73359	3.23265	3.23265	3.23265	3.23265	3.23265
Arhgef16	0.423881	1.79487	0.941956	0.355224	2.02092	2.02092	2.02092	1.59704	1.59704	1.59704	1.59704	1.59704
Arhgef17	-0.103316	6.01529	0.774177	0.400085	5.94857	5.94857	5.94857	6.05188	6.05188	6.05188	6.05188	6.05188
Arhgef18	-0.0784411	5.63058	0.924489	0.359526	5.5794	5.5794	5.5794	5.65785	5.65785	5.65785	5.65785	5.65785
Arhgef19	-0.221418	4.12035	1.06516	0.326951	3.97304	3.97304	3.97304	4.19446	4.19446	4.19446	4.19446	4.19446
Arhgef2	0.0225709	7.24875	0.0148226	0.90557	7.26216	7.26216	7.26216	7.23959	7.23959	7.23959	7.23959	7.23959
Arhgef25	-0.257672	5.58995	10.6395	0.00882643	5.42177	5.42177	5.42177	5.67945	5.67945	5.67945	5.67945	5.67945
Arhgef26	-0.0691498	6.53318	0.466305	0.510583	6.48866	6.48866	6.48866	6.55781	6.55781	6.55781	6.55781	6.55781
Arhgef28	-0.245716	5.20075	3.05895	0.111625	5.03974	5.03974	5.03974	5.28546	5.28546	5.28546	5.28546	5.28546
Arhgef3	0.140607	5.96521	2.82299	0.124609	6.05024	6.05024	6.05024	5.90963	5.90963	5.90963	5.90963	5.90963
Arhgef33	-0.509132	-0.0767715	1.46623	0.254462	-0.514595	-0.514595	-0.514595	-0.00546302	-0.00546302	-0.00546302	-0.00546302	-0.00546302
Arhgef37	-0.0344288	0.836548	0.0231476	0.882174	0.764379	0.764379	0.764379	0.798807	0.798807	0.798807	0.798807	0.798807
Arhgef39	0.756134	3.03623	15.1666	0.00313135	3.45224	3.45224	3.45224	2.6961	2.6961	2.6961	2.6961	2.6961
Arhgef4	-0.263718	6.4296	5.31109	0.0445273	6.25825	6.25825	6.25825	6.52197	6.52197	6.52197	6.52197	6.52197
Arhgef40	0.0548199	7.58345	0.227936	0.643575	7.61704	7.61704	7.61704	7.56222	7.56222	7.56222	7.56222	7.56222
Arhgef5	0.517183	3.52542	3.97144	0.0749848	3.82053	3.82053	3.82053	3.30335	3.30335	3.30335	3.30335	3.30335
Arhgef6	0.573894	5.18872	28.0495	0.000379669	5.51811	5.51811	5.51811	4.94422	4.94422	4.94422	4.94422	4.94422
Arhgef7	-0.0290334	7.41163	0.108066	0.749305	7.39287	7.39287	7.39287	7.4219	7.4219	7.4219	7.4219	7.4219
Arhgef9	-0.151561	7.05303	3.34507	0.0980939	6.95574	6.95574	6.95574	7.1073	7.1073	7.1073	7.1073	7.1073
Arid1a	0.038042	8.01521	0.0987588	0.759942	8.03852	8.03852	8.03852	8.00048	8.00048	8.00048	8.00048	8.00048
Arid1b	0.0588188	6.42975	0.79924	0.392843	6.46532	6.46532	6.46532	6.4065	6.4065	6.4065	6.4065	6.4065
Arid2	0.0483194	6.76369	0.519357	0.488026	6.79291	6.79291	6.79291	6.74459	6.74459	6.74459	6.74459	6.74459
Arid3a	0.487756	3.69213	4.96976	0.0505458	3.97159	3.97159	3.97159	3.48384	3.48384	3.48384	3.48384	3.48384
Arid3b	0.411189	3.39525	2.78967	0.126596	3.63117	3.63117	3.63117	3.21998	3.21998	3.21998	3.21998	3.21998
Arid4a	0.253562	5.81927	12.3833	0.00576209	5.9711	5.9711	5.9711	5.71754	5.71754	5.71754	5.71754	5.71754
Arid4b	-0.0646218	6.31844	0.218064	0.650774	6.27643	6.27643	6.27643	6.34106	6.34106	6.34106	6.34106	6.34106
Arid5a	-0.0305848	4.41124	0.0517754	0.8247	4.38818	4.38818	4.38818	4.41877	4.41877	4.41877	4.41877	4.41877
Arid5b	0.12202	4.67882	1.92066	0.196646	4.75071	4.75071	4.75071	4.62869	4.62869	4.62869	4.62869	4.62869
Arih1	0.00995164	6.60911	0.0163362	0.900893	6.61438	6.61438	6.61438	6.60443	6.60443	6.60443	6.60443	6.60443
Arih2	-0.0844191	5.97266	1.65311	0.228219	5.91806	5.91806	5.91806	6.00248	6.00248	6.00248	6.00248	6.00248
Arl1	-0.069343	6.40115	0.601727	0.456314	6.35639	6.35639	6.35639	6.42574	6.42574	6.42574	6.42574	6.42574
Arl10	-0.0681834	4.76702	0.514887	0.489857	4.72099	4.72099	4.72099	4.78918	4.78918	4.78918	4.78918	4.78918
Arl11	0.415115	1.51944	1.23341	0.293369	1.73254	1.73254	1.73254	1.31743	1.31743	1.31743	1.31743	1.31743
Arl13b	0.0769712	4.3523	0.25521	0.624647	4.39587	4.39587	4.39587	4.3189	4.3189	4.3189	4.3189	4.3189
Arl14ep	0.0170656	5.48001	0.0423377	0.841208	5.4887	5.4887	5.4887	5.47163	5.47163	5.47163	5.47163	5.47163
Arl15	0.0668053	5.35887	0.587129	0.461671	5.39815	5.39815	5.39815	5.33134	5.33134	5.33134	5.33134	5.33134
Arl16	-0.202628	3.59621	1.66946	0.226101	3.459	3.459	3.459	3.66163	3.66163	3.66163	3.66163	3.66163
Arl2	-0.165316	4.90423	4.65979	0.056905	4.79584	4.79584	4.79584	4.96116	4.96116	4.96116	4.96116	4.96116
Arl2bp	-0.107963	8.29429	1.35658	0.271824	8.22561	8.22561	8.22561	8.33358	8.33358	8.33358	8.33358	8.33358
Arl3	-0.0549113	5.3247	0.233517	0.63959	5.28809	5.28809	5.28809	5.343	5.343	5.343	5.343	5.343
Arl4a	-0.219312	6.33964	6.02788	0.0345154	6.19749	6.19749	6.19749	6.41681	6.41681	6.41681	6.41681	6.41681
Arl4c	0.634071	6.77763	16.0605	0.00261457	7.13984	7.13984	7.13984	6.50577	6.50577	6.50577	6.50577	6.50577
Arl4d	0.300369	2.09733	1.9101	0.197778	2.25741	2.25741	2.25741	1.95704	1.95704	1.95704	1.95704	1.95704
Arl5a	-0.112103	6.47376	0.323984	0.582091	6.40146	6.40146	6.40146	6.51357	6.51357	6.51357	6.51357	6.51357
Arl5b	-0.00859706	5.1953	0.0131503	0.911029	5.18757	5.18757	5.18757	5.19617	5.19617	5.19617	5.19617	5.19617
Arl5c	0.199808	3.85479	0.736447	0.411391	3.97079	3.97079	3.97079	3.77098	3.77098	3.77098	3.77098	3.77098
Arl6	0.0874831	3.96077	0.489695	0.50041	4.00958	4.00958	4.00958	3.9221	3.9221	3.9221	3.9221	3.9221
Arl6ip1	0.248366	8.55205	14.9353	0.00328469	8.70199	8.70199	8.70199	8.45363	8.45363	8.45363	8.45363	8.45363
Arl6ip4	-0.00040057	4.6248	7.1909e-06	0.997914	4.62132	4.62132	4.62132	4.62172	4.62172	4.62172	4.62172	4.62172
Arl6ip5	-0.0485338	6.31789	0.505575	0.493711	6.28636	6.28636	6.28636	6.3349	6.3349	6.3349	6.3349	6.3349
Arl6ip6	0.114005	4.41343	1.14163	0.311035	4.47987	4.47987	4.47987	4.36586	4.36586	4.36586	4.36586	4.36586
Arl8a	-0.136539	7.87997	1.99444	0.188975	7.79274	7.79274	7.79274	7.92928	7.92928	7.92928	7.92928	7.92928
Arl8b	-0.0601391	7.18141	0.456673	0.514883	7.14291	7.14291	7.14291	7.20305	7.20305	7.20305	7.20305	7.20305
Armc1	-0.0346846	6.02136	0.152637	0.704424	5.99824	5.99824	5.99824	6.03292	6.03292	6.03292	6.03292	6.03292
Armc10	0.096479	4.49714	1.24498	0.291244	4.55311	4.55311	4.55311	4.45663	4.45663	4.45663	4.45663	4.45663
Armc2	-0.484023	1.55006	6.04452	0.0343178	1.19702	1.19702	1.19702	1.68104	1.68104	1.68104	1.68104	1.68104
Armc3	0.0272821	-0.0378084	0.00398814	0.950921	-0.114007	-0.114007	-0.114007	-0.141289	-0.141289	-0.141289	-0.141289	-0.141289
Armc4	-0.128173	-0.919029	0.0209126	0.887961	-1.1683	-1.1683	-1.1683	-1.04013	-1.04013	-1.04013	-1.04013	-1.04013
Armc5	0.0226261	4.94887	0.0385451	0.848382	4.96045	4.96045	4.96045	4.93782	4.93782	4.93782	4.93782	4.93782
Armc6	-0.19458	4.74163	1.89454	0.19946	4.61383	4.61383	4.61383	4.80841	4.80841	4.80841	4.80841	4.80841
Armc7	0.285616	3.15217	5.07921	0.0485123	3.31505	3.31505	3.31505	3.02944	3.02944	3.02944	3.02944	3.02944
Armc8	-0.0108616	5.65328	0.0212644	0.88703	5.64481	5.64481	5.64481	5.65567	5.65567	5.65567	5.65567	5.65567
Armc9	-0.161241	4.22267	2.15452	0.17364	4.11518	4.11518	4.11518	4.27642	4.27642	4.27642	4.27642	4.27642
Armcx1	-0.0859808	4.19181	0.452718	0.516668	4.13281	4.13281	4.13281	4.21879	4.21879	4.21879	4.21879	4.21879
Armcx2	-0.0622263	5.93577	0.796431	0.393645	5.89527	5.89527	5.89527	5.9575	5.9575	5.9575	5.9575	5.9575
Armcx3	-0.105785	5.28203	1.01446	0.338167	5.21273	5.21273	5.21273	5.31851	5.31851	5.31851	5.31851	5.31851
Armcx4	0.0216817	6.34786	0.10181	0.756395	6.36032	6.36032	6.36032	6.33863	6.33863	6.33863	6.33863	6.33863
Armcx5	-0.0554071	3.75775	0.121063	0.735276	3.71678	3.71678	3.71678	3.77219	3.77219	3.77219	3.77219	3.77219
Armcx6	0.00294134	2.93705	0.000517325	0.982312	2.92815	2.92815	2.92815	2.92521	2.92521	2.92521	2.92521	2.92521
Armh1	-0.244635	-0.91756	0.376238	0.553655	-1.24291	-1.24291	-1.24291	-0.998276	-0.998276	-0.998276	-0.998276	-0.998276
Armh3	-0.12574	5.01136	1.62893	0.2314	4.92879	4.92879	4.92879	5.05453	5.05453	5.05453	5.05453	5.05453
Armh4	-0.329649	7.7184	7.89163	0.018925	7.50326	7.50326	7.50326	7.8329	7.8329	7.8329	7.8329	7.8329
Armt1	-0.134396	4.32792	2.0796	0.180605	4.2382	4.2382	4.2382	4.3726	4.3726	4.3726	4.3726	4.3726
Arnt	0.0406082	5.97707	0.162194	0.695829	6.00088	6.00088	6.00088	5.96027	5.96027	5.96027	5.96027	5.96027
Arnt2	-0.0377847	7.96645	0.198233	0.665868	7.94239	7.94239	7.94239	7.98017	7.98017	7.98017	7.98017	7.98017
Arntl	-0.237419	4.75815	7.91435	0.0187957	4.60196	4.60196	4.60196	4.83938	4.83938	4.83938	4.83938	4.83938
Arntl2	-0.00470546	2.48162	0.000764052	0.978505	2.46282	2.46282	2.46282	2.46753	2.46753	2.46753	2.46753	2.46753
Arpc1a	-0.247083	6.91402	9.8984	0.0107126	6.75399	6.75399	6.75399	7.00108	7.00108	7.00108	7.00108	7.00108
Arpc1b	0.140486	6.66955	1.10041	0.319471	6.75514	6.75514	6.75514	6.61465	6.61465	6.61465	6.61465	6.61465
Arpc2	0.172007	7.35295	4.39432	0.0631562	7.4576	7.4576	7.4576	7.28559	7.28559	7.28559	7.28559	7.28559
Arpc3	-0.0501977	6.26024	0.162193	0.69583	6.2278	6.2278	6.2278	6.278	6.278	6.278	6.278	6.278
Arpc4	0.0404497	6.27643	0.196926	0.666895	6.30065	6.30065	6.30065	6.2602	6.2602	6.2602	6.2602	6.2602
Arpc5	0.0952396	7.08028	1.49075	0.25079	7.13849	7.13849	7.13849	7.04326	7.04326	7.04326	7.04326	7.04326
Arpc5l	-0.0104209	5.37049	0.0176843	0.896911	5.36203	5.36203	5.36203	5.37245	5.37245	5.37245	5.37245	5.37245
Arpin	0.0741466	4.85993	0.624865	0.448036	4.90302	4.90302	4.90302	4.82887	4.82887	4.82887	4.82887	4.82887
Arpp19	-0.0813599	6.59452	0.666804	0.433657	6.54219	6.54219	6.54219	6.62355	6.62355	6.62355	6.62355	6.62355
Arpp21	-0.24015	5.4832	3.17525	0.105856	5.32659	5.32659	5.32659	5.56674	5.56674	5.56674	5.56674	5.56674
Arrb1	-0.0503927	7.51892	0.298159	0.597304	7.48677	7.48677	7.48677	7.53716	7.53716	7.53716	7.53716	7.53716
Arrb2	0.226255	6.40748	3.02827	0.113212	6.54391	6.54391	6.54391	6.31766	6.31766	6.31766	6.31766	6.31766
Arrdc1	0.334176	3.57437	4.28435	0.065994	3.7674	3.7674	3.7674	3.43323	3.43323	3.43323	3.43323	3.43323
Arrdc2	-0.145972	3.46553	1.25809	0.288864	3.36471	3.36471	3.36471	3.51068	3.51068	3.51068	3.51068	3.51068
Arrdc3	0.437751	5.79718	6.92084	0.0256216	6.05325	6.05325	6.05325	5.6155	5.6155	5.6155	5.6155	5.6155
Arrdc4	0.107199	4.59387	1.32867	0.276506	4.65663	4.65663	4.65663	4.54943	4.54943	4.54943	4.54943	4.54943
Arsa	-0.0502647	5.01584	0.438166	0.523338	4.98168	4.98168	4.98168	5.03195	5.03195	5.03195	5.03195	5.03195
Arsb	-0.138598	9.81363	1.16925	0.305561	9.72536	9.72536	9.72536	9.86396	9.86396	9.86396	9.86396	9.86396
Arsg	0.00301625	3.7694	0.000412362	0.984208	3.76521	3.76521	3.76521	3.76219	3.76219	3.76219	3.76219	3.76219
Arsi	0.504373	0.349871	0.745428	0.408654	0.573903	0.573903	0.573903	0.0695303	0.0695303	0.0695303	0.0695303	0.0695303
Arsj	0.0294071	1.49053	0.0109009	0.918961	1.47646	1.47646	1.47646	1.44705	1.44705	1.44705	1.44705	1.44705
Arsk	0.0688996	4.47528	0.369668	0.557075	4.5142	4.5142	4.5142	4.4453	4.4453	4.4453	4.4453	4.4453
Art3	0.147526	1.85511	0.303189	0.594274	1.92214	1.92214	1.92214	1.77461	1.77461	1.77461	1.77461	1.77461
Artn	-0.259389	-1.44216	0.225505	0.64533	-1.85787	-1.85787	-1.85787	-1.59848	-1.59848	-1.59848	-1.59848	-1.59848
Arv1	-0.0812235	3.46815	0.3808	0.551306	3.40931	3.40931	3.40931	3.49053	3.49053	3.49053	3.49053	3.49053
Arvcf	-0.301254	7.33838	17.3809	0.0020269	7.14231	7.14231	7.14231	7.44356	7.44356	7.44356	7.44356	7.44356
Arx	-0.280509	3.34642	4.80604	0.0537883	3.15624	3.15624	3.15624	3.43675	3.43675	3.43675	3.43675	3.43675
Arxes1	0.0272382	5.222	0.059701	0.812032	5.23674	5.23674	5.23674	5.2095	5.2095	5.2095	5.2095	5.2095
Arxes2	-0.0756064	6.18023	0.615805	0.451247	6.13135	6.13135	6.13135	6.20696	6.20696	6.20696	6.20696	6.20696
As3mt	0.0156494	4.16497	0.0322318	0.861194	4.17013	4.17013	4.17013	4.15448	4.15448	4.15448	4.15448	4.15448
Asah1	0.149815	7.32147	3.03241	0.112996	7.41279	7.41279	7.41279	7.26298	7.26298	7.26298	7.26298	7.26298
Asah2	0.277207	3.8225	3.24471	0.102591	3.98394	3.98394	3.98394	3.70673	3.70673	3.70673	3.70673	3.70673
Asap1	0.0871261	6.46128	1.45827	0.255669	6.51425	6.51425	6.51425	6.42712	6.42712	6.42712	6.42712	6.42712
Asap2	-0.0788228	6.09357	1.44457	0.257767	6.04249	6.04249	6.04249	6.12131	6.12131	6.12131	6.12131	6.12131
Asap3	-0.345797	5.30439	3.25123	0.102291	5.07619	5.07619	5.07619	5.42199	5.42199	5.42199	5.42199	5.42199
Asb1	-0.233125	5.34595	9.35471	0.0124137	5.19367	5.19367	5.19367	5.42679	5.42679	5.42679	5.42679	5.42679
Asb10	0.508025	0.877041	1.32839	0.276553	1.12483	1.12483	1.12483	0.616806	0.616806	0.616806	0.616806	0.616806
Asb13	-0.147629	5.27945	1.99035	0.18939	5.18325	5.18325	5.18325	5.33088	5.33088	5.33088	5.33088	5.33088
Asb18	-0.947217	2.17149	11.1165	0.00782395	1.49171	1.49171	1.49171	2.43892	2.43892	2.43892	2.43892	2.43892
Asb2	0.771277	2.96398	14.3626	0.00370524	3.38682	3.38682	3.38682	2.61554	2.61554	2.61554	2.61554	2.61554
Asb3	0.026695	4.38039	0.0682293	0.799364	4.39301	4.39301	4.39301	4.36632	4.36632	4.36632	4.36632	4.36632
Asb4	0.0989523	1.67239	0.103026	0.754998	1.70702	1.70702	1.70702	1.60807	1.60807	1.60807	1.60807	1.60807
Asb5	-0.116576	0.688949	0.0881839	0.772726	0.557832	0.557832	0.557832	0.674408	0.674408	0.674408	0.674408	0.674408
Asb6	-0.22178	4.76913	4.90223	0.0518531	4.62347	4.62347	4.62347	4.84525	4.84525	4.84525	4.84525	4.84525
Asb7	-0.0487514	4.79241	0.220069	0.649296	4.75868	4.75868	4.75868	4.80743	4.80743	4.80743	4.80743	4.80743
Asb8	-0.190374	4.78909	5.28196	0.045005	4.66405	4.66405	4.66405	4.85442	4.85442	4.85442	4.85442	4.85442
Ascc1	-0.0431572	3.80049	0.100591	0.757805	3.76728	3.76728	3.76728	3.81044	3.81044	3.81044	3.81044	3.81044
Ascc2	-0.0376526	5.74832	0.117245	0.739305	5.72303	5.72303	5.72303	5.76068	5.76068	5.76068	5.76068	5.76068
Ascc3	0.170345	5.2393	2.18079	0.171282	5.34102	5.34102	5.34102	5.17068	5.17068	5.17068	5.17068	5.17068
Ascl1	0.00061409	6.24714	1.59077e-05	0.996898	6.24652	6.24652	6.24652	6.2459	6.2459	6.2459	6.2459	6.2459
Ascl2	-1.04287	-0.901093	5.22192	0.0460101	-1.80562	-1.80562	-1.80562	-0.76275	-0.76275	-0.76275	-0.76275	-0.76275
Ascl4	-0.0835973	-0.423625	0.049957	0.827749	-0.595787	-0.595787	-0.595787	-0.512189	-0.512189	-0.512189	-0.512189	-0.512189
Asf1a	0.0501524	4.87029	0.183723	0.677503	4.89853	4.89853	4.89853	4.84838	4.84838	4.84838	4.84838	4.84838
Asf1b	1.14307	2.98501	25.1476	0.000567062	3.58095	3.58095	3.58095	2.43788	2.43788	2.43788	2.43788	2.43788
Asgr1	0.912677	-0.539007	7.30139	0.0226973	-0.148763	-0.148763	-0.148763	-1.06144	-1.06144	-1.06144	-1.06144	-1.06144
Asgr2	0.32534	0.515575	0.591095	0.460205	0.649237	0.649237	0.649237	0.323897	0.323897	0.323897	0.323897	0.323897
Ash1l	0.0622082	7.22272	0.491623	0.499588	7.26067	7.26067	7.26067	7.19847	7.19847	7.19847	7.19847	7.19847
Ash2l	-0.0122882	6.34521	0.0332198	0.859108	6.33643	6.33643	6.33643	6.34872	6.34872	6.34872	6.34872	6.34872
Asic1	-0.416366	7.32728	26.6049	0.000461673	7.05277	7.05277	7.05277	7.46913	7.46913	7.46913	7.46913	7.46913
Asic2	-0.104332	5.44692	0.54087	0.479381	5.37898	5.37898	5.37898	5.48331	5.48331	5.48331	5.48331	5.48331
Asic4	0.03458	6.22317	0.101156	0.757151	6.24369	6.24369	6.24369	6.20911	6.20911	6.20911	6.20911	6.20911
Asl	-0.174345	4.02432	1.85438	0.203893	3.90756	3.90756	3.90756	4.0819	4.0819	4.0819	4.0819	4.0819
Asna1	-0.131566	6.12811	2.41862	0.151717	6.04327	6.04327	6.04327	6.17484	6.17484	6.17484	6.17484	6.17484
Asns	-0.203968	4.83028	7.26776	0.0229388	4.69642	4.69642	4.69642	4.90038	4.90038	4.90038	4.90038	4.90038
Asnsd1	0.14449	2.30387	0.79339	0.394515	2.37543	2.37543	2.37543	2.23094	2.23094	2.23094	2.23094	2.23094
Aspa	0.497719	3.65893	3.53964	0.0900611	3.94357	3.94357	3.94357	3.44585	3.44585	3.44585	3.44585	3.44585
Aspdh	-0.146993	3.36413	0.135303	0.720851	3.26335	3.26335	3.26335	3.41035	3.41035	3.41035	3.41035	3.41035
Aspg	-0.985363	1.89244	5.33602	0.0441232	1.17121	1.17121	1.17121	2.15657	2.15657	2.15657	2.15657	2.15657
Asph	0.348786	6.49629	15.0115	0.0032332	6.70344	6.70344	6.70344	6.35465	6.35465	6.35465	6.35465	6.35465
Asphd1	-0.223769	-0.0998493	0.245342	0.631341	-0.339459	-0.339459	-0.339459	-0.11569	-0.11569	-0.11569	-0.11569	-0.11569
Asphd2	-0.221237	5.41783	6.02352	0.0345674	5.27363	5.27363	5.27363	5.49487	5.49487	5.49487	5.49487	5.49487
Aspm	0.897793	5.73798	44.8888	6.04391e-05	6.23006	6.23006	6.23006	5.33227	5.33227	5.33227	5.33227	5.33227
Aspn	0.429649	2.03814	0.775703	0.399638	2.27424	2.27424	2.27424	1.84459	1.84459	1.84459	1.84459	1.84459
Asprv1	-0.523463	-0.973908	0.959296	0.35103	-1.50091	-1.50091	-1.50091	-0.977451	-0.977451	-0.977451	-0.977451	-0.977451
Aspscr1	-0.0554838	5.81785	0.742559	0.409525	5.78149	5.78149	5.78149	5.83698	5.83698	5.83698	5.83698	5.83698
Asrgl1	-0.199155	8.56113	3.62972	0.0866227	8.43325	8.43325	8.43325	8.6324	8.6324	8.6324	8.6324	8.6324
Ass1	0.337649	1.45482	1.29629	0.282082	1.62789	1.62789	1.62789	1.29024	1.29024	1.29024	1.29024	1.29024
Aste1	-0.0723078	3.32125	0.308981	0.590826	3.26737	3.26737	3.26737	3.33968	3.33968	3.33968	3.33968	3.33968
Astn1	0.0219595	8.64735	0.0563629	0.817251	8.66081	8.66081	8.66081	8.63885	8.63885	8.63885	8.63885	8.63885
Astn2	-0.309585	7.01169	14.7219	0.00343429	6.80983	6.80983	6.80983	7.11941	7.11941	7.11941	7.11941	7.11941
Asxl1	0.122824	6.27631	2.13742	0.175198	6.35073	6.35073	6.35073	6.22791	6.22791	6.22791	6.22791	6.22791
Asxl2	0.0446811	6.34405	0.097238	0.761732	6.37061	6.37061	6.37061	6.32592	6.32592	6.32592	6.32592	6.32592
Asxl3	0.0314778	4.4728	0.0513895	0.825343	4.48857	4.48857	4.48857	4.45709	4.45709	4.45709	4.45709	4.45709
Atad1	-0.014599	7.08351	0.0220449	0.884992	7.07369	7.07369	7.07369	7.08829	7.08829	7.08829	7.08829	7.08829
Atad2	0.782003	4.94477	43.4869	6.8766e-05	5.38004	5.38004	5.38004	4.59804	4.59804	4.59804	4.59804	4.59804
Atad2b	0.00847019	5.96091	0.0107359	0.919575	5.96477	5.96477	5.96477	5.9563	5.9563	5.9563	5.9563	5.9563
Atad3a	-0.094143	5.90278	1.53902	0.243772	5.84186	5.84186	5.84186	5.936	5.936	5.936	5.936	5.936
Atad3aos	0.100336	-0.805033	0.0251377	0.877259	-0.908694	-0.908694	-0.908694	-1.00903	-1.00903	-1.00903	-1.00903	-1.00903
Atad5	0.586879	4.58134	22.3723	0.000860958	4.91628	4.91628	4.91628	4.3294	4.3294	4.3294	4.3294	4.3294
Atat1	-0.291594	6.85264	7.03384	0.0247075	6.66274	6.66274	6.66274	6.95434	6.95434	6.95434	6.95434	6.95434
Atcay	-0.205822	7.49374	5.41017	0.0429481	7.36119	7.36119	7.36119	7.56701	7.56701	7.56701	7.56701	7.56701
Ate1	-0.124558	6.24837	1.39494	0.265567	6.16812	6.16812	6.16812	6.29267	6.29267	6.29267	6.29267	6.29267
Atf1	0.161844	4.29478	1.64963	0.228673	4.3898	4.3898	4.3898	4.22795	4.22795	4.22795	4.22795	4.22795
Atf2	0.0653343	6.24423	0.906592	0.364016	6.28355	6.28355	6.28355	6.21822	6.21822	6.21822	6.21822	6.21822
Atf3	0.12685	6.37922	0.157366	0.700133	6.45667	6.45667	6.45667	6.32982	6.32982	6.32982	6.32982	6.32982
Atf4	-0.00311208	7.13622	0.00235875	0.962244	7.13368	7.13368	7.13368	7.13679	7.13679	7.13679	7.13679	7.13679
Atf5	-0.0980252	4.57595	0.469354	0.509235	4.5104	4.5104	4.5104	4.60842	4.60842	4.60842	4.60842	4.60842
Atf6	0.0564676	6.21798	0.464477	0.511394	6.25181	6.25181	6.25181	6.19534	6.19534	6.19534	6.19534	6.19534
Atf6b	-0.0184771	6.77316	0.0601131	0.811398	6.76078	6.76078	6.76078	6.77926	6.77926	6.77926	6.77926	6.77926
Atf7	-0.0194104	6.18827	0.0223381	0.884236	6.17475	6.17475	6.17475	6.19416	6.19416	6.19416	6.19416	6.19416
Atf7ip	-0.0414236	7.26431	0.277088	0.610375	7.23772	7.23772	7.23772	7.27915	7.27915	7.27915	7.27915	7.27915
Atg10	0.135773	2.24161	0.480588	0.504327	2.30709	2.30709	2.30709	2.17132	2.17132	2.17132	2.17132	2.17132
Atg101	-0.0860992	4.41306	0.373918	0.554858	4.35474	4.35474	4.35474	4.44083	4.44083	4.44083	4.44083	4.44083
Atg12	-0.138383	5.7641	2.00449	0.18796	5.67459	5.67459	5.67459	5.81298	5.81298	5.81298	5.81298	5.81298
Atg13	-0.150201	6.00023	4.48098	0.0610258	5.90314	5.90314	5.90314	6.05334	6.05334	6.05334	6.05334	6.05334
Atg14	-0.0368294	4.39948	0.160649	0.697198	4.3724	4.3724	4.3724	4.40923	4.40923	4.40923	4.40923	4.40923
Atg16l1	-0.0926687	5.45256	0.725597	0.414737	5.39195	5.39195	5.39195	5.48462	5.48462	5.48462	5.48462	5.48462
Atg16l2	-0.0244776	4.6704	0.0262601	0.874574	4.65181	4.65181	4.65181	4.67629	4.67629	4.67629	4.67629	4.67629
Atg2a	-0.0797195	6.08899	0.985095	0.344925	6.03747	6.03747	6.03747	6.11719	6.11719	6.11719	6.11719	6.11719
Atg2b	-0.0846269	6.27201	0.781616	0.397914	6.21733	6.21733	6.21733	6.30196	6.30196	6.30196	6.30196	6.30196
Atg3	0.0211682	5.81616	0.0418019	0.842201	5.8278	5.8278	5.8278	5.80663	5.80663	5.80663	5.80663	5.80663
Atg4a	-0.241334	3.54231	2.44923	0.149415	3.37952	3.37952	3.37952	3.62085	3.62085	3.62085	3.62085	3.62085
Atg4b	-0.0697772	5.82227	0.906605	0.364013	5.77679	5.77679	5.77679	5.84657	5.84657	5.84657	5.84657	5.84657
Atg4c	-0.0761055	4.66132	0.390592	0.546329	4.60983	4.60983	4.60983	4.68594	4.68594	4.68594	4.68594	4.68594
Atg4d	-0.210709	4.59419	5.83271	0.03694	4.45538	4.45538	4.45538	4.66609	4.66609	4.66609	4.66609	4.66609
Atg5	-0.0472404	5.08269	0.252795	0.62627	5.0505	5.0505	5.0505	5.09774	5.09774	5.09774	5.09774	5.09774
Atg7	-0.0445702	5.09759	0.337168	0.574637	5.06714	5.06714	5.06714	5.11171	5.11171	5.11171	5.11171	5.11171
Atg9a	-0.184317	6.09969	5.07813	0.0485319	5.98042	5.98042	5.98042	6.16474	6.16474	6.16474	6.16474	6.16474
Atg9b	-0.123611	-1.4358	0.0529318	0.822791	-1.751	-1.751	-1.751	-1.62739	-1.62739	-1.62739	-1.62739	-1.62739
Atic	-0.0681952	5.81726	0.989328	0.343938	5.77281	5.77281	5.77281	5.84101	5.84101	5.84101	5.84101	5.84101
Atl1	-0.250548	4.77994	2.49412	0.146118	4.61508	4.61508	4.61508	4.86563	4.86563	4.86563	4.86563	4.86563
Atl2	0.000287184	5.89053	1.48544e-05	0.997003	5.88926	5.88926	5.88926	5.88897	5.88897	5.88897	5.88897	5.88897
Atl3	0.09029	6.73218	0.78573	0.396721	6.78707	6.78707	6.78707	6.69678	6.69678	6.69678	6.69678	6.69678
Atm	0.263795	5.88193	7.18162	0.0235715	6.03954	6.03954	6.03954	5.77575	5.77575	5.77575	5.77575	5.77575
Atmin	-0.225608	6.36306	3.75029	0.0822744	6.21674	6.21674	6.21674	6.44234	6.44234	6.44234	6.44234	6.44234
Atn1	0.0922792	4.23833	0.719642	0.416592	4.29099	4.29099	4.29099	4.19872	4.19872	4.19872	4.19872	4.19872
Atoh7	-0.347883	-1.84301	0.242099	0.633578	-2.41457	-2.41457	-2.41457	-2.06669	-2.06669	-2.06669	-2.06669	-2.06669
Atoh8	-0.340118	2.51491	1.37498	0.268797	2.27649	2.27649	2.27649	2.61661	2.61661	2.61661	2.61661	2.61661
Atox1	-0.013431	4.72993	0.00563121	0.941698	4.71856	4.71856	4.71856	4.73199	4.73199	4.73199	4.73199	4.73199
Atp10a	0.158595	3.11985	0.408978	0.537217	3.20768	3.20768	3.20768	3.04908	3.04908	3.04908	3.04908	3.04908
Atp10b	-0.282162	5.07063	1.90312	0.198529	4.88511	4.88511	4.88511	5.16727	5.16727	5.16727	5.16727	5.16727
Atp10d	0.343408	3.28895	1.65293	0.228242	3.48597	3.48597	3.48597	3.14256	3.14256	3.14256	3.14256	3.14256
Atp11a	-0.116264	7.48639	0.420752	0.531534	7.41207	7.41207	7.41207	7.52834	7.52834	7.52834	7.52834	7.52834
Atp11b	0.106156	6.40678	0.441305	0.521885	6.47106	6.47106	6.47106	6.3649	6.3649	6.3649	6.3649	6.3649
Atp11c	0.210781	5.46691	4.53021	0.0598554	5.59302	5.59302	5.59302	5.38223	5.38223	5.38223	5.38223	5.38223
Atp13a1	-0.119701	6.64747	1.24098	0.291978	6.57065	6.57065	6.57065	6.69035	6.69035	6.69035	6.69035	6.69035
Atp13a2	-0.0499831	7.45195	0.19867	0.665526	7.42012	7.42012	7.42012	7.4701	7.4701	7.4701	7.4701	7.4701
Atp13a3	0.188074	7.3196	5.73045	0.0382938	7.43372	7.43372	7.43372	7.24564	7.24564	7.24564	7.24564	7.24564
Atp13a4	-0.300109	4.81059	2.79558	0.12624	4.61266	4.61266	4.61266	4.91277	4.91277	4.91277	4.91277	4.91277
Atp13a5	0.319894	3.78583	0.887969	0.36878	3.97192	3.97192	3.97192	3.65202	3.65202	3.65202	3.65202	3.65202
Atp1a1	0.148407	8.34026	4.75827	0.0547825	8.43097	8.43097	8.43097	8.28257	8.28257	8.28257	8.28257	8.28257
Atp1a2	-0.26008	11.0337	5.99476	0.0349127	10.8657	10.8657	10.8657	11.1258	11.1258	11.1258	11.1258	11.1258
Atp1a3	-0.108049	6.82321	0.783357	0.397408	6.75408	6.75408	6.75408	6.86213	6.86213	6.86213	6.86213	6.86213
Atp1b1	-0.142454	6.89119	3.00504	0.114433	6.79982	6.79982	6.79982	6.94228	6.94228	6.94228	6.94228	6.94228
Atp1b2	-0.198656	9.87176	3.12572	0.108266	9.74434	9.74434	9.74434	9.94299	9.94299	9.94299	9.94299	9.94299
Atp1b3	0.202496	6.72939	9.62986	0.0115148	6.85185	6.85185	6.85185	6.64936	6.64936	6.64936	6.64936	6.64936
Atp23	-0.0273738	2.93469	0.0471731	0.832533	2.90646	2.90646	2.90646	2.93384	2.93384	2.93384	2.93384	2.93384
Atp2a1	0.44656	-1.49854	0.607025	0.454396	-1.48431	-1.48431	-1.48431	-1.93087	-1.93087	-1.93087	-1.93087	-1.93087
Atp2a2	-0.0366867	9.31513	0.0897688	0.770758	9.29195	9.29195	9.29195	9.32863	9.32863	9.32863	9.32863	9.32863
Atp2a3	0.663562	3.82524	5.31283	0.0444989	4.19864	4.19864	4.19864	3.53508	3.53508	3.53508	3.53508	3.53508
Atp2b1	0.166871	7.16203	5.33866	0.0440808	7.26348	7.26348	7.26348	7.09661	7.09661	7.09661	7.09661	7.09661
Atp2b2	-0.0813843	5.6622	1.06017	0.328031	5.60907	5.60907	5.60907	5.69045	5.69045	5.69045	5.69045	5.69045
Atp2b3	-0.38653	4.19767	5.2904	0.0448661	3.93927	3.93927	3.93927	4.3258	4.3258	4.3258	4.3258	4.3258
Atp2b4	-0.0545329	6.56848	0.241745	0.633824	6.53326	6.53326	6.53326	6.58779	6.58779	6.58779	6.58779	6.58779
Atp2c1	-0.0816217	7.47175	0.493291	0.498879	7.41966	7.41966	7.41966	7.50128	7.50128	7.50128	7.50128	7.50128
Atp4a	-0.39333	1.68163	2.86297	0.122279	1.39579	1.39579	1.39579	1.78912	1.78912	1.78912	1.78912	1.78912
Atp5a1	-0.0807591	9.15233	0.703358	0.421733	9.10118	9.10118	9.10118	9.18194	9.18194	9.18194	9.18194	9.18194
Atp5b	-0.16319	9.51106	3.18729	0.105281	9.40681	9.40681	9.40681	9.57	9.57	9.57	9.57	9.57
Atp5c1	-0.0877558	7.34224	0.778738	0.398751	7.28628	7.28628	7.28628	7.37403	7.37403	7.37403	7.37403	7.37403
Atp5d	-0.196467	6.74689	2.4602	0.1486	6.62033	6.62033	6.62033	6.8168	6.8168	6.8168	6.8168	6.8168
Atp5e	-0.442596	5.8117	3.16105	0.10654	5.51838	5.51838	5.51838	5.96097	5.96097	5.96097	5.96097	5.96097
Atp5g1	-0.203622	5.80621	2.79834	0.126075	5.67412	5.67412	5.67412	5.87774	5.87774	5.87774	5.87774	5.87774
Atp5g2	-0.0620965	5.77611	0.279306	0.608969	5.73567	5.73567	5.73567	5.79777	5.79777	5.79777	5.79777	5.79777
Atp5g3	-0.132626	7.02522	1.46377	0.254834	6.94034	6.94034	6.94034	7.07296	7.07296	7.07296	7.07296	7.07296
Atp5h	-0.145338	6.65433	2.19745	0.169808	6.56096	6.56096	6.56096	6.70629	6.70629	6.70629	6.70629	6.70629
Atp5j	-0.0396321	6.25127	0.117617	0.738909	6.22545	6.22545	6.22545	6.26508	6.26508	6.26508	6.26508	6.26508
Atp5j2	-0.310922	6.12494	3.10103	0.109492	5.92188	5.92188	5.92188	6.2328	6.2328	6.2328	6.2328	6.2328
Atp5k	-0.21633	4.89976	1.70397	0.221718	4.75806	4.75806	4.75806	4.97439	4.97439	4.97439	4.97439	4.97439
Atp5l	-0.304649	5.7514	4.41389	0.0626672	5.55219	5.55219	5.55219	5.85684	5.85684	5.85684	5.85684	5.85684
Atp5md	-0.414416	5.7338	4.32002	0.0650566	5.45979	5.45979	5.45979	5.87421	5.87421	5.87421	5.87421	5.87421
Atp5mpl	-0.145234	5.06543	0.681201	0.428896	4.9706	4.9706	4.9706	5.11584	5.11584	5.11584	5.11584	5.11584
Atp5o	-0.121322	5.68619	1.18012	0.303446	5.60767	5.60767	5.60767	5.72899	5.72899	5.72899	5.72899	5.72899
Atp5pb	-0.149316	7.52149	1.3589	0.27144	7.42591	7.42591	7.42591	7.57523	7.57523	7.57523	7.57523	7.57523
ATP6	-0.326387	4.16734	1.33029	0.276231	3.94982	3.94982	3.94982	4.27621	4.27621	4.27621	4.27621	4.27621
Atp6ap1	-0.0616479	7.70812	0.745752	0.408556	7.66886	7.66886	7.66886	7.73051	7.73051	7.73051	7.73051	7.73051
Atp6ap1l	-0.608209	0.253353	2.16601	0.172604	-0.245955	-0.245955	-0.245955	0.362254	0.362254	0.362254	0.362254	0.362254
Atp6ap2	0.182965	6.38584	6.38058	0.0306096	6.49659	6.49659	6.49659	6.31362	6.31362	6.31362	6.31362	6.31362
Atp6v0a1	0.0437056	7.52989	0.248134	0.62943	7.55662	7.55662	7.55662	7.51292	7.51292	7.51292	7.51292	7.51292
Atp6v0a2	-0.249733	7.41423	2.8091	0.125432	7.25257	7.25257	7.25257	7.5023	7.5023	7.5023	7.5023	7.5023
Atp6v0a4	-0.947309	-0.649308	7.14429	0.0238524	-1.46349	-1.46349	-1.46349	-0.516177	-0.516177	-0.516177	-0.516177	-0.516177
Atp6v0b	-0.247035	6.97686	6.58028	0.028638	6.81698	6.81698	6.81698	7.06401	7.06401	7.06401	7.06401	7.06401
Atp6v0c	0.0345597	5.96162	0.0156841	0.90288	5.98165	5.98165	5.98165	5.94709	5.94709	5.94709	5.94709	5.94709
Atp6v0d1	-0.055849	6.94659	0.648403	0.43987	6.9108	6.9108	6.9108	6.96665	6.96665	6.96665	6.96665	6.96665
Atp6v0d2	-0.515615	-0.706482	0.894099	0.367201	-1.22019	-1.22019	-1.22019	-0.704578	-0.704578	-0.704578	-0.704578	-0.704578
Atp6v0e	-0.279604	6.22665	6.30529	0.0313958	6.04467	6.04467	6.04467	6.32427	6.32427	6.32427	6.32427	6.32427
Atp6v0e2	-0.173079	7.51776	4.88118	0.0522692	7.40672	7.40672	7.40672	7.57979	7.57979	7.57979	7.57979	7.57979
Atp6v1a	-0.0460209	7.51097	0.383216	0.550069	7.48156	7.48156	7.48156	7.52758	7.52758	7.52758	7.52758	7.52758
Atp6v1b2	-0.0424123	7.29169	0.429876	0.52721	7.2645	7.2645	7.2645	7.30691	7.30691	7.30691	7.30691	7.30691
Atp6v1c1	0.0777522	5.77708	0.966435	0.349324	5.82363	5.82363	5.82363	5.74587	5.74587	5.74587	5.74587	5.74587
Atp6v1c2	0.144786	-1.43124	0.128711	0.727415	-1.58975	-1.58975	-1.58975	-1.73453	-1.73453	-1.73453	-1.73453	-1.73453
Atp6v1d	0.0907741	5.81158	1.93317	0.195316	5.86616	5.86616	5.86616	5.77538	5.77538	5.77538	5.77538	5.77538
Atp6v1e1	-0.173867	6.22247	3.23116	0.103218	6.11033	6.11033	6.11033	6.2842	6.2842	6.2842	6.2842	6.2842
Atp6v1e2	0.700041	-1.49673	0.942747	0.355031	-1.35611	-1.35611	-1.35611	-2.05615	-2.05615	-2.05615	-2.05615	-2.05615
Atp6v1f	-0.197514	5.47959	1.90226	0.198623	5.35119	5.35119	5.35119	5.54871	5.54871	5.54871	5.54871	5.54871
Atp6v1g1	-0.0988421	6.32938	0.568833	0.468538	6.26583	6.26583	6.26583	6.36468	6.36468	6.36468	6.36468	6.36468
Atp6v1g2	-0.326964	4.79516	9.24364	0.0128006	4.57906	4.57906	4.57906	4.90603	4.90603	4.90603	4.90603	4.90603
Atp6v1h	-0.0994571	6.09026	1.2849	0.284079	6.02605	6.02605	6.02605	6.12551	6.12551	6.12551	6.12551	6.12551
Atp7a	0.169471	4.89628	2.06839	0.181678	4.99713	4.99713	4.99713	4.82765	4.82765	4.82765	4.82765	4.82765
Atp7b	-0.48264	4.58721	7.34629	0.0223799	4.26336	4.26336	4.26336	4.746	4.746	4.746	4.746	4.746
ATP8	-0.457093	1.81071	2.26389	0.164091	1.48072	1.48072	1.48072	1.93781	1.93781	1.93781	1.93781	1.93781
Atp8a1	0.0112671	7.60063	0.00946361	0.924473	7.60719	7.60719	7.60719	7.59592	7.59592	7.59592	7.59592	7.59592
Atp8a2	0.0293117	5.41302	0.0633216	0.806543	5.4294	5.4294	5.4294	5.40009	5.40009	5.40009	5.40009	5.40009
Atp8b1	0.561807	2.34044	3.02653	0.113303	2.65094	2.65094	2.65094	2.08913	2.08913	2.08913	2.08913	2.08913
Atp8b2	0.0260119	6.0242	0.0784807	0.785218	6.03919	6.03919	6.03919	6.01317	6.01317	6.01317	6.01317	6.01317
Atp8b3	-0.45257	-0.258769	1.92846	0.195815	-0.671951	-0.671951	-0.671951	-0.21938	-0.21938	-0.21938	-0.21938	-0.21938
Atp8b4	0.418539	-1.05994	0.607186	0.454338	-0.989256	-0.989256	-0.989256	-1.4078	-1.4078	-1.4078	-1.4078	-1.4078
Atp8b5	-0.216359	-0.285679	0.466426	0.510529	-0.531193	-0.531193	-0.531193	-0.314834	-0.314834	-0.314834	-0.314834	-0.314834
Atp9a	-0.240392	8.27773	7.11571	0.0240701	8.12257	8.12257	8.12257	8.36296	8.36296	8.36296	8.36296	8.36296
Atp9b	-0.0279744	6.22829	0.0768213	0.787437	6.20967	6.20967	6.20967	6.23765	6.23765	6.23765	6.23765	6.23765
Atpaf1	-0.266385	4.25727	8.54547	0.0155996	4.08049	4.08049	4.08049	4.34688	4.34688	4.34688	4.34688	4.34688
Atpaf2	-0.0185767	4.31722	0.0331698	0.859213	4.3014	4.3014	4.3014	4.31998	4.31998	4.31998	4.31998	4.31998
Atpif1	-0.112862	6.08425	0.617651	0.45059	6.01165	6.01165	6.01165	6.12451	6.12451	6.12451	6.12451	6.12451
Atpsckmt	-0.110283	4.12904	0.736614	0.41134	4.05425	4.05425	4.05425	4.16453	4.16453	4.16453	4.16453	4.16453
Atr	0.266824	5.375	3.99054	0.074394	5.53389	5.53389	5.53389	5.26706	5.26706	5.26706	5.26706	5.26706
Atraid	-0.128386	6.02888	2.69555	0.132428	5.946	5.946	5.946	6.07438	6.07438	6.07438	6.07438	6.07438
Atrip	-0.087603	4.5496	1.12969	0.313446	4.4906	4.4906	4.4906	4.5782	4.5782	4.5782	4.5782	4.5782
Atrip-trex1	-0.087603	4.5496	1.12969	0.313446	4.4906	4.4906	4.4906	4.5782	4.5782	4.5782	4.5782	4.5782
Atrn	-0.126569	7.89153	0.664712	0.434356	7.8107	7.8107	7.8107	7.93727	7.93727	7.93727	7.93727	7.93727
Atrnl1	0.0520595	5.57813	0.356826	0.563882	5.60878	5.60878	5.60878	5.55672	5.55672	5.55672	5.55672	5.55672
Atrx	-0.0123508	7.90987	0.0134642	0.909979	7.90175	7.90175	7.90175	7.9141	7.9141	7.9141	7.9141	7.9141
Atxn1	-0.0309567	5.01818	0.17054	0.688563	4.99623	4.99623	4.99623	5.02718	5.02718	5.02718	5.02718	5.02718
Atxn10	-0.0989536	7.62633	1.54735	0.242588	7.56327	7.56327	7.56327	7.66222	7.66222	7.66222	7.66222	7.66222
Atxn1l	0.0243101	6.56575	0.160965	0.696917	6.57999	6.57999	6.57999	6.55568	6.55568	6.55568	6.55568	6.55568
Atxn2	-0.105255	6.59097	0.673642	0.431385	6.52328	6.52328	6.52328	6.62854	6.62854	6.62854	6.62854	6.62854
Atxn2l	-0.0922606	8.08128	0.376626	0.553455	8.02261	8.02261	8.02261	8.11487	8.11487	8.11487	8.11487	8.11487
Atxn3	0.0501768	5.40987	0.418129	0.53279	5.43899	5.43899	5.43899	5.38882	5.38882	5.38882	5.38882	5.38882
Atxn7	-0.0451463	5.12771	0.112347	0.744584	5.09689	5.09689	5.09689	5.14204	5.14204	5.14204	5.14204	5.14204
Atxn7l1	-0.0367925	4.14379	0.0502785	0.827206	4.11592	4.11592	4.11592	4.15271	4.15271	4.15271	4.15271	4.15271
Atxn7l2	-0.188594	4.09929	1.68441	0.224187	3.97353	3.97353	3.97353	4.16212	4.16212	4.16212	4.16212	4.16212
Atxn7l3	-0.121522	6.57289	3.51211	0.0911463	6.49482	6.49482	6.49482	6.61634	6.61634	6.61634	6.61634	6.61634
Atxn7l3b	-0.15145	8.38385	2.74067	0.12959	8.28708	8.28708	8.28708	8.43853	8.43853	8.43853	8.43853	8.43853
AU021092	0.415626	3.10072	2.94355	0.117748	3.33724	3.33724	3.33724	2.92162	2.92162	2.92162	2.92162	2.92162
AU022252	-0.264536	5.3232	11.6103	0.00692816	5.15	5.15	5.15	5.41454	5.41454	5.41454	5.41454	5.41454
AU022751	-0.317601	-1.52606	0.383489	0.54993	-1.98343	-1.98343	-1.98343	-1.66583	-1.66583	-1.66583	-1.66583	-1.66583
AU022754	-0.404789	2.77151	1.39893	0.264928	2.49379	2.49379	2.49379	2.89858	2.89858	2.89858	2.89858	2.89858
AU040320	-0.0917539	6.66047	0.728867	0.413724	6.60147	6.60147	6.60147	6.69323	6.69323	6.69323	6.69323	6.69323
AU040972	0.295604	-0.569511	0.379197	0.552129	-0.509461	-0.509461	-0.509461	-0.805065	-0.805065	-0.805065	-0.805065	-0.805065
AU041133	-0.0191127	2.60954	0.00845651	0.928591	2.58393	2.58393	2.58393	2.60304	2.60304	2.60304	2.60304	2.60304
Auh	-0.13613	4.71669	2.47661	0.147393	4.62684	4.62684	4.62684	4.76297	4.76297	4.76297	4.76297	4.76297
Aunip	0.97217	0.200276	9.21135	0.0129159	0.661081	0.661081	0.661081	-0.311088	-0.311088	-0.311088	-0.311088	-0.311088
Aup1	-0.0629849	6.33158	0.604154	0.455434	6.29096	6.29096	6.29096	6.35394	6.35394	6.35394	6.35394	6.35394
Aurka	0.925297	3.57433	32.9169	0.000207073	4.07517	4.07517	4.07517	3.14987	3.14987	3.14987	3.14987	3.14987
Aurkaip1	-0.298849	5.35029	4.98976	0.0501664	5.15436	5.15436	5.15436	5.45321	5.45321	5.45321	5.45321	5.45321
Aurkb	0.791701	4.29591	20.7277	0.00112293	4.73483	4.73483	4.73483	3.94313	3.94313	3.94313	3.94313	3.94313
Auts2	0.284486	5.25135	4.74211	0.0551241	5.4202	5.4202	5.4202	5.13571	5.13571	5.13571	5.13571	5.13571
AV039307	-0.411383	-1.12534	0.73016	0.413324	-1.59768	-1.59768	-1.59768	-1.18629	-1.18629	-1.18629	-1.18629	-1.18629
Aven	-0.0672714	2.65157	0.195925	0.667684	2.59636	2.59636	2.59636	2.66363	2.66363	2.66363	2.66363	2.66363
Avil	0.15865	-1.47108	0.0512332	0.825603	-1.62318	-1.62318	-1.62318	-1.78183	-1.78183	-1.78183	-1.78183	-1.78183
Avl9	-0.075123	6.24197	1.38981	0.266392	6.1934	6.1934	6.1934	6.26852	6.26852	6.26852	6.26852	6.26852
Avpi1	0.0779513	1.99714	0.137058	0.719135	2.02358	2.02358	2.02358	1.94563	1.94563	1.94563	1.94563	1.94563
AW011738	-0.0502677	4.7896	0.16446	0.693834	4.75493	4.75493	4.75493	4.8052	4.8052	4.8052	4.8052	4.8052
AW112010	0.415282	-0.580591	0.689803	0.426092	-0.470641	-0.470641	-0.470641	-0.885924	-0.885924	-0.885924	-0.885924	-0.885924
AW146154	-0.14712	2.6308	0.704456	0.421383	2.5235	2.5235	2.5235	2.67062	2.67062	2.67062	2.67062	2.67062
AW209491	-0.151411	3.47398	0.724914	0.414949	3.36963	3.36963	3.36963	3.52104	3.52104	3.52104	3.52104	3.52104
AW495222	-0.318207	0.102109	0.905424	0.364312	-0.191567	-0.191567	-0.191567	0.12664	0.12664	0.12664	0.12664	0.12664
AW549542	0.329634	1.005	0.340066	0.573025	1.16065	1.16065	1.16065	0.831012	0.831012	0.831012	0.831012	0.831012
AW549877	-0.0809631	7.01873	0.47761	0.505619	6.9668	6.9668	6.9668	7.04776	7.04776	7.04776	7.04776	7.04776
AW551984	-0.134491	4.6779	0.790539	0.395334	4.5891	4.5891	4.5891	4.72359	4.72359	4.72359	4.72359	4.72359
AW554918	0.247022	4.09857	7.30693	0.0226578	4.24339	4.24339	4.24339	3.99637	3.99637	3.99637	3.99637	3.99637
AW822252	-0.180092	-0.812088	0.199241	0.665079	-1.08574	-1.08574	-1.08574	-0.905647	-0.905647	-0.905647	-0.905647	-0.905647
Axdnd1	-0.226047	-0.42955	0.198267	0.665841	-0.700132	-0.700132	-0.700132	-0.474085	-0.474085	-0.474085	-0.474085	-0.474085
Axin1	0.0111263	5.86225	0.0280239	0.870472	5.86786	5.86786	5.86786	5.85673	5.85673	5.85673	5.85673	5.85673
Axin2	0.064104	5.81269	0.683793	0.428048	5.85089	5.85089	5.85089	5.78678	5.78678	5.78678	5.78678	5.78678
Axl	-0.116387	6.6982	1.27838	0.285233	6.62361	6.62361	6.62361	6.73999	6.73999	6.73999	6.73999	6.73999
Azi2	0.0176048	5.7808	0.0642023	0.805233	5.7902	5.7902	5.7902	5.77259	5.77259	5.77259	5.77259	5.77259
Azin1	-0.0132392	7.27781	0.0221259	0.884783	7.26899	7.26899	7.26899	7.28223	7.28223	7.28223	7.28223	7.28223
Azin2	0.00521025	3.25609	0.000971032	0.975769	3.25041	3.25041	3.25041	3.2452	3.2452	3.2452	3.2452	3.2452
B130024G19Rik	0.00572248	1.19569	0.00036571	0.985128	1.16089	1.16089	1.16089	1.15517	1.15517	1.15517	1.15517	1.15517
B130034C11Rik	-0.445405	0.0910395	1.23875	0.292386	-0.288085	-0.288085	-0.288085	0.15732	0.15732	0.15732	0.15732	0.15732
B230112J18Rik	0.482007	-0.433116	1.19388	0.300798	-0.25364	-0.25364	-0.25364	-0.735647	-0.735647	-0.735647	-0.735647	-0.735647
B230118H07Rik	-0.0678645	4.84874	0.359149	0.562638	4.80301	4.80301	4.80301	4.87087	4.87087	4.87087	4.87087	4.87087
B230206H07Rik	-0.647395	0.783945	0.982426	0.345549	0.306435	0.306435	0.306435	0.953831	0.953831	0.953831	0.953831	0.953831
B230208H11Rik	-1.32931	-0.65631	8.16833	0.0174215	-1.77935	-1.77935	-1.77935	-0.450038	-0.450038	-0.450038	-0.450038	-0.450038
B230216N24Rik	0.325517	-0.350059	0.636087	0.444111	-0.251367	-0.251367	-0.251367	-0.576884	-0.576884	-0.576884	-0.576884	-0.576884
B230217C12Rik	-0.197706	3.46046	1.92428	0.19626	3.32597	3.32597	3.32597	3.52367	3.52367	3.52367	3.52367	3.52367
B230217O12Rik	-0.57793	0.0741445	3.93542	0.0761153	-0.399823	-0.399823	-0.399823	0.178106	0.178106	0.178106	0.178106	0.178106
B230219D22Rik	0.0610179	7.08732	0.493592	0.498751	7.12449	7.12449	7.12449	7.06347	7.06347	7.06347	7.06347	7.06347
B230307C23Rik	-0.340204	2.61147	3.29934	0.100112	2.37549	2.37549	2.37549	2.71569	2.71569	2.71569	2.71569	2.71569
B230354K17Rik	-0.101768	5.82971	0.58158	0.463735	5.76376	5.76376	5.76376	5.86553	5.86553	5.86553	5.86553	5.86553
B2m	0.332107	7.76727	1.28349	0.284328	7.96555	7.96555	7.96555	7.63345	7.63345	7.63345	7.63345	7.63345
B3galnt1	0.175208	4.79263	2.41546	0.151958	4.89682	4.89682	4.89682	4.72161	4.72161	4.72161	4.72161	4.72161
B3galnt2	-0.282975	4.20458	3.66342	0.0853789	4.01654	4.01654	4.01654	4.29952	4.29952	4.29952	4.29952	4.29952
B3galt1	0.009442	4.85724	0.0063185	0.938251	4.86021	4.86021	4.86021	4.85077	4.85077	4.85077	4.85077	4.85077
B3galt2	-0.182413	4.48893	2.11781	0.177008	4.36831	4.36831	4.36831	4.55072	4.55072	4.55072	4.55072	4.55072
B3galt4	0.240215	1.89576	1.32442	0.277229	2.01985	2.01985	2.01985	1.77964	1.77964	1.77964	1.77964	1.77964
B3galt5	0.202295	4.64998	2.43672	0.15035	4.76982	4.76982	4.76982	4.56752	4.56752	4.56752	4.56752	4.56752
B3galt6	-0.124832	3.70961	1.0952	0.32056	3.62383	3.62383	3.62383	3.74867	3.74867	3.74867	3.74867	3.74867
B3gat1	-0.158857	8.30919	2.52264	0.144072	8.2076	8.2076	8.2076	8.36646	8.36646	8.36646	8.36646	8.36646
B3gat2	0.101979	7.68072	1.10463	0.318591	7.74321	7.74321	7.74321	7.64123	7.64123	7.64123	7.64123	7.64123
B3gat3	-0.106224	5.47043	2.38554	0.154258	5.40129	5.40129	5.40129	5.50751	5.50751	5.50751	5.50751	5.50751
B3glct	-0.0260169	5.98927	0.103225	0.754772	5.97156	5.97156	5.97156	5.99758	5.99758	5.99758	5.99758	5.99758
B3gnt2	0.679427	-0.0512664	4.50588	0.0604305	0.260694	0.260694	0.260694	-0.418733	-0.418733	-0.418733	-0.418733	-0.418733
B3gnt3	-0.0431458	0.141994	0.00243377	0.961649	0.0308315	0.0308315	0.0308315	0.0739773	0.0739773	0.0739773	0.0739773	0.0739773
B3gnt4	0.846121	0.27736	9.48209	0.0119873	0.681224	0.681224	0.681224	-0.164897	-0.164897	-0.164897	-0.164897	-0.164897
B3gnt5	0.172691	4.92201	3.24106	0.102759	5.02479	5.02479	5.02479	4.8521	4.8521	4.8521	4.8521	4.8521
B3gnt6	-0.108691	-1.26142	0.060091	0.811432	-1.53219	-1.53219	-1.53219	-1.4235	-1.4235	-1.4235	-1.4235	-1.4235
B3gnt7	-0.340389	4.44013	9.46203	0.0120533	4.21404	4.21404	4.21404	4.55443	4.55443	4.55443	4.55443	4.55443
B3gnt8	0.33473	-0.298616	0.264073	0.618774	-0.215165	-0.215165	-0.215165	-0.549895	-0.549895	-0.549895	-0.549895	-0.549895
B3gnt9	-0.573708	3.57889	2.77824	0.127286	3.18755	3.18755	3.18755	3.76126	3.76126	3.76126	3.76126	3.76126
B3gntl1	0.0324156	3.63117	0.0444163	0.837418	3.64483	3.64483	3.64483	3.61241	3.61241	3.61241	3.61241	3.61241
B430212C06Rik	-1.47155	-1.38445	5.6696	0.0391284	-2.73015	-2.73015	-2.73015	-1.25859	-1.25859	-1.25859	-1.25859	-1.25859
B430306N03Rik	-1.31857	-0.914594	4.49716	0.0606382	-2.04837	-2.04837	-2.04837	-0.729798	-0.729798	-0.729798	-0.729798	-0.729798
B430319G15Rik	-0.376391	0.772638	2.1309	0.175797	0.472728	0.472728	0.472728	0.849119	0.849119	0.849119	0.849119	0.849119
B4galnt1	-0.00234971	5.63267	0.000809669	0.977873	5.62961	5.62961	5.62961	5.63196	5.63196	5.63196	5.63196	5.63196
B4galnt3	0.0828413	0.234326	0.0596027	0.812183	0.212674	0.212674	0.212674	0.129833	0.129833	0.129833	0.129833	0.129833
B4galnt4	-0.232647	5.36687	5.59633	0.0401633	5.21512	5.21512	5.21512	5.44777	5.44777	5.44777	5.44777	5.44777
B4galt1	0.547344	5.10094	10.3619	0.00948151	5.4163	5.4163	5.4163	4.86896	4.86896	4.86896	4.86896	4.86896
B4galt2	0.0401477	6.26816	0.186905	0.674906	6.29215	6.29215	6.29215	6.25201	6.25201	6.25201	6.25201	6.25201
B4galt3	-0.0526863	5.23138	0.46422	0.511508	5.19603	5.19603	5.19603	5.24872	5.24872	5.24872	5.24872	5.24872
B4galt4	0.0896336	4.94619	1.22947	0.294099	4.99895	4.99895	4.99895	4.90931	4.90931	4.90931	4.90931	4.90931
B4galt5	0.246059	4.85665	2.4755	0.147474	5.0029	5.0029	5.0029	4.75684	4.75684	4.75684	4.75684	4.75684
B4galt6	0.112514	6.31037	2.7215	0.130786	6.37855	6.37855	6.37855	6.26604	6.26604	6.26604	6.26604	6.26604
B4galt7	-0.195562	4.42127	5.59657	0.0401598	4.29194	4.29194	4.29194	4.4875	4.4875	4.4875	4.4875	4.4875
B4gat1	-0.00613004	-0.875968	0.000202197	0.988941	-1.02867	-1.02867	-1.02867	-1.02254	-1.02254	-1.02254	-1.02254	-1.02254
B630019K06Rik	-0.368618	4.23617	2.30757	0.160469	3.99027	3.99027	3.99027	4.35889	4.35889	4.35889	4.35889	4.35889
B930025P03Rik	2.02031	-1.56451	13.1296	0.00485465	-0.867386	-0.867386	-0.867386	-2.8877	-2.8877	-2.8877	-2.8877	-2.8877
B9d1	-0.134197	2.45236	0.512936	0.49066	2.35113	2.35113	2.35113	2.48532	2.48532	2.48532	2.48532	2.48532
B9d1os	-0.274629	4.45893	1.16971	0.305472	4.27732	4.27732	4.27732	4.55195	4.55195	4.55195	4.55195	4.55195
B9d2	-0.541739	3.23819	8.53918	0.015628	2.86636	2.86636	2.86636	3.4081	3.4081	3.4081	3.4081	3.4081
Baalc	-0.29963	6.91394	2.9488	0.11746	6.71886	6.71886	6.71886	7.01849	7.01849	7.01849	7.01849	7.01849
Babam1	-0.0668902	5.5921	0.566425	0.469455	5.54817	5.54817	5.54817	5.61506	5.61506	5.61506	5.61506	5.61506
Babam2	-0.00464487	4.93027	0.00212179	0.964189	4.92458	4.92458	4.92458	4.92922	4.92922	4.92922	4.92922	4.92922
Bace1	-0.281106	7.55534	1.31007	0.279688	7.37273	7.37273	7.37273	7.65384	7.65384	7.65384	7.65384	7.65384
Bace2	-0.15605	3.90946	0.269607	0.615171	3.80441	3.80441	3.80441	3.96046	3.96046	3.96046	3.96046	3.96046
Bach1	0.131447	6.21933	3.12315	0.108392	6.29902	6.29902	6.29902	6.16757	6.16757	6.16757	6.16757	6.16757
Bach2	0.0602021	5.26744	0.523463	0.486355	5.30256	5.30256	5.30256	5.24236	5.24236	5.24236	5.24236	5.24236
Bach2os	0.502156	-0.75402	0.578625	0.464841	-0.623718	-0.623718	-0.623718	-1.12587	-1.12587	-1.12587	-1.12587	-1.12587
Bad	-0.130659	4.32021	0.986095	0.344691	4.23291	4.23291	4.23291	4.36357	4.36357	4.36357	4.36357	4.36357
Bag1	-0.350147	5.72987	10.2412	0.00978483	5.49963	5.49963	5.49963	5.84978	5.84978	5.84978	5.84978	5.84978
Bag2	-0.192865	3.49449	1.86478	0.202733	3.3632	3.3632	3.3632	3.55606	3.55606	3.55606	3.55606	3.55606
Bag3	0.0718663	4.22484	0.227407	0.643956	4.26502	4.26502	4.26502	4.19316	4.19316	4.19316	4.19316	4.19316
Bag4	-0.0286413	5.03056	0.116794	0.739786	5.00998	5.00998	5.00998	5.03862	5.03862	5.03862	5.03862	5.03862
Bag5	-0.00790134	4.70031	0.00622658	0.9387	4.69214	4.69214	4.69214	4.70004	4.70004	4.70004	4.70004	4.70004
Bag6	-0.0899585	8.11843	1.69316	0.223078	8.06126	8.06126	8.06126	8.15121	8.15121	8.15121	8.15121	8.15121
Bahcc1	0.0373585	6.68906	0.0878794	0.773106	6.71139	6.71139	6.71139	6.67403	6.67403	6.67403	6.67403	6.67403
Bahd1	0.0112984	5.39264	0.0149191	0.905265	5.39781	5.39781	5.39781	5.38651	5.38651	5.38651	5.38651	5.38651
Baiap2	0.359713	4.88863	12.4354	0.00569242	5.10026	5.10026	5.10026	4.74054	4.74054	4.74054	4.74054	4.74054
Baiap2l1	0.418265	0.222322	0.580223	0.464242	0.409375	0.409375	0.409375	-0.00889037	-0.00889037	-0.00889037	-0.00889037	-0.00889037
Baiap2l2	-0.388553	1.93182	4.5202	0.0600912	1.65443	1.65443	1.65443	2.04298	2.04298	2.04298	2.04298	2.04298
Baiap3	0.0101236	0.354065	0.000666537	0.979924	0.29318	0.29318	0.29318	0.283057	0.283057	0.283057	0.283057	0.283057
Bak1	-0.0414741	6.42544	0.29009	0.602236	6.39847	6.39847	6.39847	6.43994	6.43994	6.43994	6.43994	6.43994
Bambi	0.275497	2.59656	1.87894	0.201167	2.75004	2.75004	2.75004	2.47454	2.47454	2.47454	2.47454	2.47454
Banf1	0.109085	5.55283	1.01237	0.338642	5.61848	5.61848	5.61848	5.50939	5.50939	5.50939	5.50939	5.50939
Bank1	0.713383	2.79823	7.73038	0.0198741	3.19143	3.19143	3.19143	2.47805	2.47805	2.47805	2.47805	2.47805
Banp	-0.197291	4.76753	4.64139	0.0573129	4.63789	4.63789	4.63789	4.83518	4.83518	4.83518	4.83518	4.83518
Bap1	-0.0870041	6.78296	1.18938	0.30166	6.72723	6.72723	6.72723	6.81423	6.81423	6.81423	6.81423	6.81423
Bard1	0.892018	3.06259	15.864	0.00271871	3.54505	3.54505	3.54505	2.65303	2.65303	2.65303	2.65303	2.65303
Barx2	-0.136966	3.0306	0.375322	0.55413	2.93275	2.93275	2.93275	3.06972	3.06972	3.06972	3.06972	3.06972
Basp1	0.265988	7.60762	5.8191	0.0371167	7.76772	7.76772	7.76772	7.50173	7.50173	7.50173	7.50173	7.50173
Batf	0.276049	-0.0770884	0.461384	0.512772	-0.00823921	-0.00823921	-0.00823921	-0.284289	-0.284289	-0.284289	-0.284289	-0.284289
Batf2	-0.141908	0.385023	0.040351	0.844922	0.213003	0.213003	0.213003	0.354911	0.354911	0.354911	0.354911	0.354911
Batf3	0.65382	0.445028	1.20886	0.297951	0.748686	0.748686	0.748686	0.0948665	0.0948665	0.0948665	0.0948665	0.0948665
Bax	0.182062	5.46015	3.78027	0.0812355	5.56953	5.56953	5.56953	5.38747	5.38747	5.38747	5.38747	5.38747
Baz1a	0.190802	4.00016	1.79812	0.210327	4.11147	4.11147	4.11147	3.92067	3.92067	3.92067	3.92067	3.92067
Baz1b	0.193403	7.25863	4.0912	0.0713737	7.37588	7.37588	7.37588	7.18248	7.18248	7.18248	7.18248	7.18248
Baz2a	-0.0304512	6.7595	0.110259	0.746874	6.7396	6.7396	6.7396	6.77005	6.77005	6.77005	6.77005	6.77005
Baz2b	0.0406312	5.99588	0.0750304	0.789861	6.0196	6.0196	6.0196	5.97897	5.97897	5.97897	5.97897	5.97897
BB218582	0.00255751	0.986161	8.98298e-05	0.992629	0.946108	0.946108	0.946108	0.943551	0.943551	0.943551	0.943551	0.943551
Bbc3	0.519781	3.61464	23.7048	0.000701384	3.91103	3.91103	3.91103	3.39125	3.39125	3.39125	3.39125	3.39125
Bbip1	-0.123884	5.41722	0.998724	0.341764	5.33662	5.33662	5.33662	5.46051	5.46051	5.46051	5.46051	5.46051
Bbof1	-0.139259	1.76777	0.236638	0.637388	1.65535	1.65535	1.65535	1.79461	1.79461	1.79461	1.79461	1.79461
Bbox1	-0.0599061	0.376635	0.0127487	0.912392	0.272944	0.272944	0.272944	0.33285	0.33285	0.33285	0.33285	0.33285
Bbs1	-0.0797883	5.31036	1.12957	0.31347	5.25791	5.25791	5.25791	5.3377	5.3377	5.3377	5.3377	5.3377
Bbs10	-0.061694	2.47009	0.13834	0.717889	2.41595	2.41595	2.41595	2.47764	2.47764	2.47764	2.47764	2.47764
Bbs12	0.147638	2.36152	0.530087	0.48368	2.43544	2.43544	2.43544	2.2878	2.2878	2.2878	2.2878	2.2878
Bbs2	-0.309912	3.77929	3.45827	0.0933157	3.57159	3.57159	3.57159	3.8815	3.8815	3.8815	3.8815	3.8815
Bbs4	-0.0819754	4.24479	0.482139	0.503656	4.18856	4.18856	4.18856	4.27054	4.27054	4.27054	4.27054	4.27054
Bbs5	-0.0655263	2.36853	0.122238	0.73405	2.31091	2.31091	2.31091	2.37643	2.37643	2.37643	2.37643	2.37643
Bbs7	0.0440354	4.51325	0.19747	0.666467	4.53696	4.53696	4.53696	4.49292	4.49292	4.49292	4.49292	4.49292
Bbs9	-0.0098086	4.44004	0.0146209	0.906211	4.43006	4.43006	4.43006	4.43987	4.43987	4.43987	4.43987	4.43987
Bbx	-0.0716394	5.44696	0.82746	0.384933	5.39972	5.39972	5.39972	5.47135	5.47135	5.47135	5.47135	5.47135
BC002059	-0.111427	3.47194	0.510025	0.491863	3.39371	3.39371	3.39371	3.50513	3.50513	3.50513	3.50513	3.50513
BC003965	-0.0392344	4.46491	0.112707	0.744192	4.43649	4.43649	4.43649	4.47572	4.47572	4.47572	4.47572	4.47572
BC004004	-0.00675493	5.69882	0.00739669	0.933203	5.69298	5.69298	5.69298	5.69973	5.69973	5.69973	5.69973	5.69973
BC005537	0.0501696	7.945	0.537702	0.480637	7.97581	7.97581	7.97581	7.92564	7.92564	7.92564	7.92564	7.92564
BC005624	-0.00278244	5.0156	0.00107132	0.974549	5.01137	5.01137	5.01137	5.01415	5.01415	5.01415	5.01415	5.01415
BC006965	-0.118027	1.39857	0.257042	0.623423	1.29098	1.29098	1.29098	1.40901	1.40901	1.40901	1.40901	1.40901
BC017158	-0.00246691	4.68103	0.000625014	0.980559	4.67629	4.67629	4.67629	4.67875	4.67875	4.67875	4.67875	4.67875
BC024063	-0.0190783	2.10949	0.00785445	0.931173	2.07687	2.07687	2.07687	2.09594	2.09594	2.09594	2.09594	2.09594
BC024139	-1.20025	0.114739	3.08491	0.110303	-0.843594	-0.843594	-0.843594	0.356657	0.356657	0.356657	0.356657	0.356657
BC024978	-0.232956	4.1365	4.02748	0.0732673	3.98158	3.98158	3.98158	4.21453	4.21453	4.21453	4.21453	4.21453
BC025920	0.0368654	2.19709	0.0670969	0.800995	2.20227	2.20227	2.20227	2.1654	2.1654	2.1654	2.1654	2.1654
BC028528	0.320294	2.58501	3.0924	0.109925	2.76357	2.76357	2.76357	2.44328	2.44328	2.44328	2.44328	2.44328
BC029722	-0.0830538	5.08919	0.42962	0.52733	5.03429	5.03429	5.03429	5.11734	5.11734	5.11734	5.11734	5.11734
BC030500	-0.0495514	0.490606	0.0200936	0.890161	0.388862	0.388862	0.388862	0.438413	0.438413	0.438413	0.438413	0.438413
BC030867	0.638027	2.08478	8.69492	0.0149423	2.43138	2.43138	2.43138	1.79335	1.79335	1.79335	1.79335	1.79335
BC031181	-0.236356	5.94236	9.6795	0.0113611	5.78874	5.78874	5.78874	6.0251	6.0251	6.0251	6.0251	6.0251
BC034090	0.364994	3.92552	7.8392	0.0192274	4.13764	4.13764	4.13764	3.77265	3.77265	3.77265	3.77265	3.77265
BC035044	0.497711	2.59742	2.39748	0.153335	2.87406	2.87406	2.87406	2.37635	2.37635	2.37635	2.37635	2.37635
BC037704	-0.236586	0.472015	0.482775	0.503381	0.257728	0.257728	0.257728	0.494314	0.494314	0.494314	0.494314	0.494314
BC039771	0.0289093	6.92836	0.167204	0.691442	6.94571	6.94571	6.94571	6.9168	6.9168	6.9168	6.9168	6.9168
BC046251	-0.710037	1.00969	2.75881	0.128471	0.490252	0.490252	0.490252	1.20029	1.20029	1.20029	1.20029	1.20029
BC048403	0.0187263	3.23551	0.0189406	0.893336	3.23825	3.23825	3.23825	3.21952	3.21952	3.21952	3.21952	3.21952
BC049715	-0.151734	1.61033	0.53251	0.482708	1.48631	1.48631	1.48631	1.63804	1.63804	1.63804	1.63804	1.63804
BC051142	0.0063365	2.57047	0.000255925	0.987559	2.56184	2.56184	2.56184	2.5555	2.5555	2.5555	2.5555	2.5555
BC051226	-0.453017	1.67971	1.81257	0.20865	1.34818	1.34818	1.34818	1.8012	1.8012	1.8012	1.8012	1.8012
BC052040	0.105206	3.5423	0.752633	0.406479	3.60024	3.60024	3.60024	3.49504	3.49504	3.49504	3.49504	3.49504
BC055324	0.565994	2.91065	18.7593	0.00157527	3.22795	3.22795	3.22795	2.66195	2.66195	2.66195	2.66195	2.66195
BC065397	0.165975	2.65479	0.288597	0.603158	2.74282	2.74282	2.74282	2.57685	2.57685	2.57685	2.57685	2.57685
BC067074	0.00439852	4.44751	0.001055	0.974744	4.44637	4.44637	4.44637	4.44197	4.44197	4.44197	4.44197	4.44197
Bc1	-1.87099	4.15682	5.32687	0.044271	2.73812	2.73812	2.73812	4.60911	4.60911	4.60911	4.60911	4.60911
BC106179	0.216636	1.14301	0.899194	0.365897	1.24064	1.24064	1.24064	1.02401	1.02401	1.02401	1.02401	1.02401
BC147527	-0.0916696	-0.580986	0.0215177	0.886365	-0.792795	-0.792795	-0.792795	-0.701125	-0.701125	-0.701125	-0.701125	-0.701125
Bcam	0.365474	4.63844	2.5286	0.143649	4.85295	4.85295	4.85295	4.48747	4.48747	4.48747	4.48747	4.48747
Bcan	-0.404063	11.052	11.0879	0.00788002	10.7865	10.7865	10.7865	11.1905	11.1905	11.1905	11.1905	11.1905
Bcap29	0.041494	5.04293	0.0952605	0.764084	5.0662	5.0662	5.0662	5.02471	5.02471	5.02471	5.02471	5.02471
Bcap31	-0.00989056	5.68519	0.0190763	0.892957	5.67735	5.67735	5.67735	5.68724	5.68724	5.68724	5.68724	5.68724
Bcar1	-0.413817	6.42633	2.65984	0.134731	6.15272	6.15272	6.15272	6.56653	6.56653	6.56653	6.56653	6.56653
Bcar3	-0.0720575	4.64465	0.255672	0.624338	4.59585	4.59585	4.59585	4.66791	4.66791	4.66791	4.66791	4.66791
Bcas1	-0.877379	9.52548	21.7395	0.000951962	8.91829	8.91829	8.91829	9.79567	9.79567	9.79567	9.79567	9.79567
Bcas2	0.0168062	5.73121	0.0421372	0.841579	5.74025	5.74025	5.74025	5.72344	5.72344	5.72344	5.72344	5.72344
Bcas3	-0.237132	5.28306	10.535	0.00906639	5.12809	5.12809	5.12809	5.36523	5.36523	5.36523	5.36523	5.36523
Bcat1	-0.317615	6.82519	9.27741	0.0126815	6.61774	6.61774	6.61774	6.93535	6.93535	6.93535	6.93535	6.93535
Bcat2	-0.188531	4.34009	1.97385	0.191075	4.21511	4.21511	4.21511	4.40364	4.40364	4.40364	4.40364	4.40364
Bccip	-0.0768002	5.21159	0.872704	0.372755	5.1608	5.1608	5.1608	5.2376	5.2376	5.2376	5.2376	5.2376
[truncated: 13,887 more rows]
