# Supplementary figures and images for: Transient regulation of focal adhesion via Tensin3 is required for nascent oligodendrocyte differentiation
Source: eLife journal article supplement (doi:10.7554/elife.80273), 2022-10-10

*Ctrl*   *Ctrl*            *gRNA#1*        *gRNA#2*   *ladder*

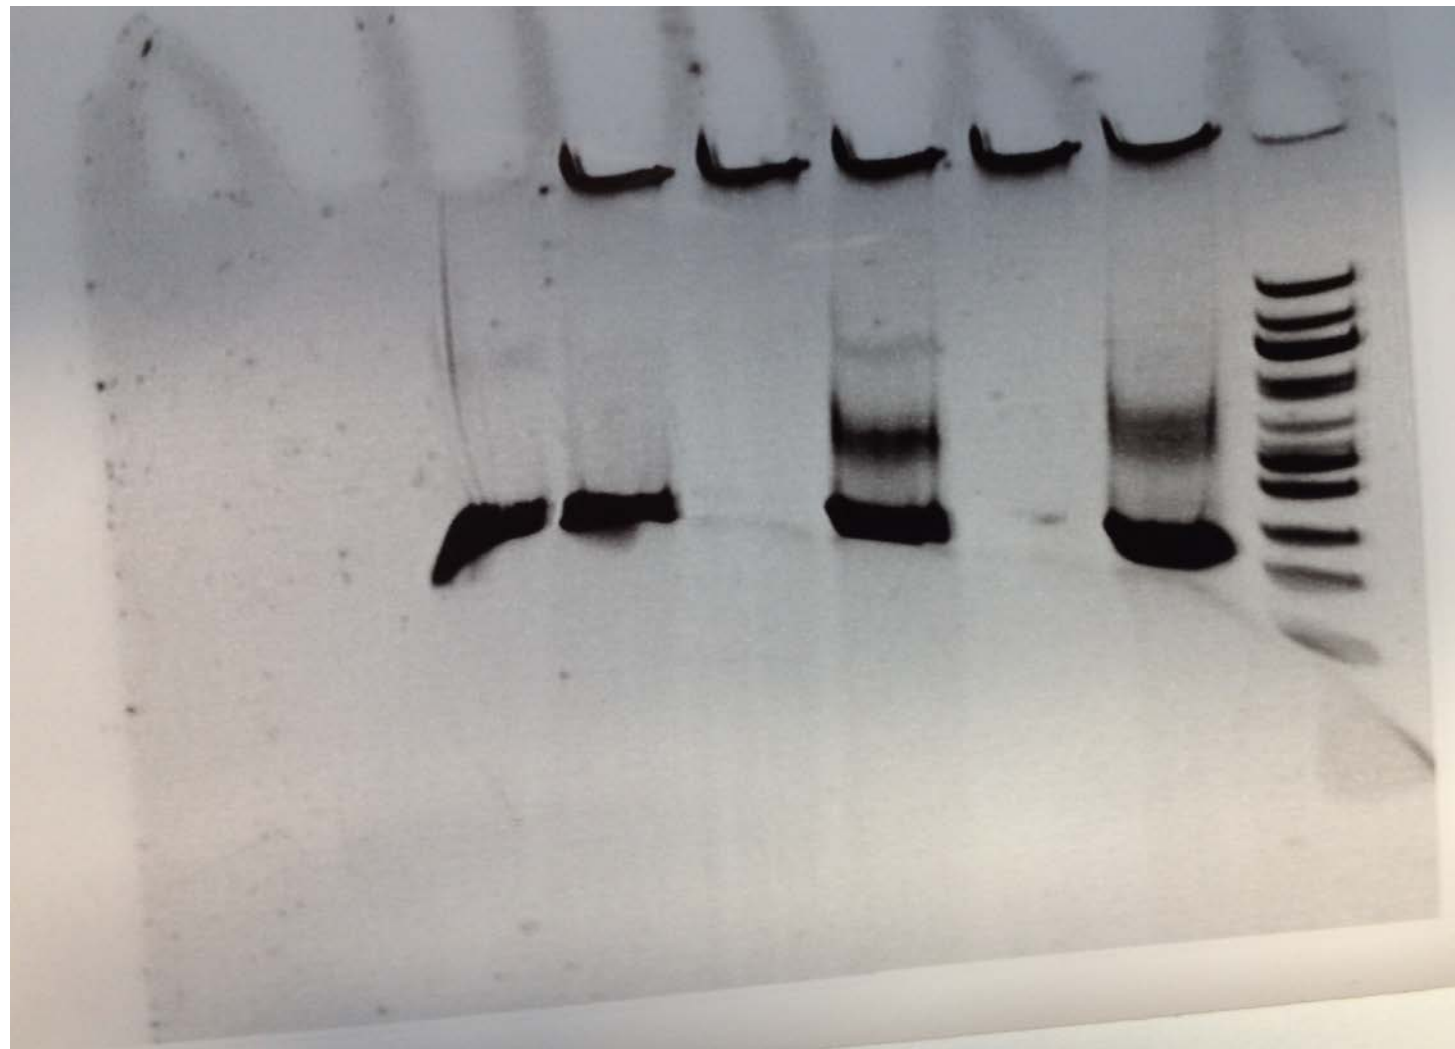

Supplement: fig3-figsupp3-data1 [file elife-80273-fig3-figsupp3-data1-v2.zip]
